# Supplementary material for: Phage resistance profiling identifies new genes required for biogenesis and modification of the corynebacterial cell envelope
Source: eLife. 2022 Nov 9;11:e79981. doi: 10.7554/eLife.79981 (PMC9671496; doi:10.7554/eLife.79981)
Supplement: Figure 1—source data 2. — This spreadsheet contains the data used to create Figure 1C. [file elife-79981-fig1-data2.xlsx]

## Sheet: Fig 1c
A
Time (m)	WT-CL31	CP-CL31
0	2160000	7100000
10	1900000	800000
20	1100000	510000
30	1050000	265000
B
Time (m)	WT-CL31	CP-CL31
0	3000000	6000000
10	1370000	1160000
20	950000	360000
30	480000	71000
C
Time (m)	WT-CL31	CP-CL31
0	2560000	4500000
10	1250000	610000
20	580000	154000
30	268000	41000
