# Supplementary material for: Phage resistance profiling identifies new genes required for biogenesis and modification of the corynebacterial cell envelope
Source: eLife. 2022 Nov 9;11:e79981. doi: 10.7554/eLife.79981 (PMC9671496; doi:10.7554/eLife.79981)
Supplement: Figure 2—source data 2. — This spreadsheet contains the data acquired from the transposon sequencing experiments. [file elife-79981-fig2-data2.xlsx]

## Sheet: Cog_1_results_genes
Loci	Name	length	TA sites	Cog_1 F reads	Cog_1 R reads	nophage_1 F reads	nophage_1 R reads	Ratio (Mut/WT)	log2	Mann Pvalue	Mann Statistic	Cog_1 Unique Insertions	nophage_1 Unique Insertions	Cog_1 Diversity	nophage_1 Diversity
CG1	dnaA	1574	1576	0	0	4	0	0.2	-2.32193	0.0786825	1240312	0	2	0	0.1
CG10	ssuR	1067	1068	248	248	2698	1837	0.1096	-3.18968	0	541540	4	61	0.2	2.9
CG100	ureF	680	680	0	0	1081	515	0.0006	-10.7027	5e-08	221680	0	29	0	2.1
CG1000	cgp1103	2498	2499	1362	867	6095	6337	0.1794	-2.47875	0	2.98673e+06	12	124	0.2	2.5
CG1001	cgp1104	1280	1281	372	124	3568	2836	0.0776	-3.6878	0	773164	4	78	0.2	3
CG1002	lysI	1505	1506	0	0	3951	1856	0.0002	-12.2877	0	1086579	0	64	0	2.1
CG1003	cgp1106	212	213	248	0	514	482	0.2497	-2.00173	0.00349433	21625.5	2	12	0.5	2.8
CG1004	cgp1107	587	561	124	124	1130	841	0.1263	-2.98507	1.118e-05	151477	2	23	0.2	2
CG1005	cgp1108	371	372	124	0	828	1031	0.0672	-3.89539	0.00011867	66403	1	17	0.1	2.3
CG1006	cgp1109	380	381	247	0	1507	1417	0.0848	-3.55979	0	65740	1	37	0.1	4.9
CG1007	cgp1110	764	765	372	124	1975	2631	0.1079	-3.21223	0	276976	4	45	0.3	2.9
CG1008	eno	1277	1278	0	0	0	77	0.0128	-6.28771	0.0416121	814725	0	3	0	0.1
CG1009	cgp1112	542	543	124	0	806	626	0.0872	-3.51953	0.00036909	143898	1	14	0.1	1.3
CG101	ureG	617	618	248	124	1567	1492	0.1219	-3.03623	0	179252	3	42	0.2	3.4
CG1010	cgp1113	554	555	0	0	0	73	0.0135	-6.2109	0.159092	153735	0	1	0	0.1
CG1011	ppx2	965	965	0	0	1298	1662	0.0003	-11.7027	0	443418	0	46	0	2.4
CG1012	cgpt5024	76	77	0	0	0	0	1	0		2964.5	0	0	0	0
CG1013	tdcB	932	933	248	247	1397	2209	0.1375	-2.8625	0	416158	3	46	0.2	2.5
CG1014	cgp1117	197	198	124	0	299	1	0.4153	-1.26777	0.0290699	19109	1	6	0.3	1.5
CG1015	cgp1118	332	333	124	0	1625	1355	0.0419	-4.57691	2e-08	50289	1	32	0.2	4.8
CG1016	cgp1119	191	192	0	0	218	11	0.0043	-7.86145	0.00688136	17856	0	6	0	1.6
CG1017	ripA	995	996	248	0	2823	2235	0.0492	-4.3452	0	477601	2	39	0.1	2
CG1018	cgp1121	818	819	248	0	1181	0	0.2107	-2.24674	5.768e-05	328022	2	20	0.1	1.2
CG1019	cgp1122	452	453	124	0	509	286	0.157	-2.67116	0.00062868	99890	1	13	0.1	1.4
CG102	ureD	851	852	124	0	3152	2841	0.0209	-5.58035	0	340808	1	54	0.1	3.2
CG1020	greA	524	525	0	0	53	159	0.0047	-7.73312	0.0125623	136500	0	5	0	0.5
CG1021	cgp1124	98	99	0	0	50	124	0.0057	-7.45482	0.0413714	4752	0	3	0	1.5
CG1022	cgp1125	338	302	0	0	0	29	0.0333	-4.90833	0.159458	45451	0	1	0	0.2
CG1023	mca	884	885	248	248	3483	3127	0.0752	-3.73312	0	365563	4	65	0.2	3.7
CG1024	cgp1128	320	321	0	0	183	1	0.0054	-7.53282	0.022582	50878.5	0	4	0	0.6
CG1025	aorR	77	78	0	0	0	0	1	0		3042	0	0	0	0
CG1026	aroF	1100	1101	0	372	2991	2448	0.0686	-3.86565	0	573663	3	64	0.1	2.9
CG1027	uppS1	770	771	124	124	1680	1182	0.087	-3.52284	1e-08	284132	2	37	0.1	2.4
CG1028	cgp1131	521	522	0	0	2677	2028	0.0002	-12.2877	0	126585	0	37	0	3.5
CG1029	coaA	971	972	0	0	0	15	0.0625	-4	0.078703	471420	0	2	0	0.1
CG103	cgp0120	779	776	124	124	2654	1816	0.0557	-4.16618	0	285199	2	43	0.1	2.8
CG1030	glyA	1304	1305	0	0	0	1	0.5	-1	0.158841	850860	0	1	0	0
CG1031	pab	1862	1859	248	248	3139	3129	0.0793	-3.65654	0	1.66296e+06	4	74	0.1	2
CG1032	cgp1135	725	726	0	124	1828	3033	0.0257	-5.28209	0	248664	1	43	0.1	3
CG1033	cgp1136	389	390	0	124	283	663	0.132	-2.92139	8.08e-06	72158.5	1	21	0.1	2.7
CG1034	cgp1137	674	675	0	124	59	238	0.4195	-1.25326	0.00111002	224106	1	12	0.1	0.9
CG1035	cgp1138	539	536	0	124	161	596	0.1649	-2.60034	0.00012684	139635	1	16	0.1	1.5
CG1036	cgp1139	881	882	0	0	1591	1195	0.0004	-11.2877	0	370881	0	42	0	2.4
CG1037	cgp1140	653	650	0	496	1632	2335	0.1253	-2.99654	0	198613	4	43	0.3	3.3
CG1038	cgp1141	758	748	0	372	2814	2309	0.0728	-3.77992	0	258482	3	60	0.2	4
CG1039	cgp1142	1310	1311	744	620	4265	3676	0.1719	-2.54036	0	811718	11	86	0.4	3.3
CG104	cgp0121	1154	1155	124	248	1523	2281	0.098	-3.35107	0	641638	3	47	0.1	2
CG1040	cgp1143	653	654	0	124	453	1260	0.0729	-3.77794	1.02e-06	206016	1	25	0.1	1.9
CG1041	cgp1144	1244	1245	0	124	2375	3170	0.0225	-5.47393	0	742656	1	55	0	2.2
CG1042	fum	1409	1410	0	0	371	195	0.0018	-9.11779	2.13e-06	979245	0	21	0	0.7
CG1043	ssuI	491	492	0	0	821	1099	0.0005	-10.9658	1e-08	113652	0	30	0	3
CG1044	cgp1148	263	264	0	0	189	546	0.0014	-9.48036	0.00125716	33660	0	9	0	1.7
CG1045	cgp1149	425	426	0	124	624	1516	0.0584	-4.09789	1.59e-06	85845.5	1	25	0.1	2.9
CG1046	cgp1150	566	567	124	248	2411	2871	0.0706	-3.82419	0	146607	3	53	0.3	4.7
CG1047	seuA	1463	1464	372	0	3869	3189	0.0528	-4.24332	0	1.01316e+06	3	87	0.1	3
CG1048	seuB	1082	1075	0	495	1167	2783	0.1255	-2.99424	1e-08	557959	3	40	0.1	1.9
CG1049	seuC	1199	1200	124	496	1984	2667	0.1335	-2.90509	0	690655	5	55	0.2	2.3
CG105	cgp0122	2777	2778	495	372	6775	7006	0.063	-3.9885	0	3654724	6	155	0.1	2.8
CG1050	ssuD2	1178	1179	124	248	3166	3359	0.0572	-4.12784	0	656742	3	68	0.1	2.9
CG1051	fbp	1007	1008	124	372	2734	3490	0.0798	-3.64747	0	477334	4	65	0.2	3.2
CG1052	cgp1158	572	573	0	0	1376	510	0.0005	-10.9658	3.7e-07	157288	0	24	0	2.1
CG1053	cgp1159	1904	1905	124	124	3839	4820	0.0288	-5.11779	0	1714564	2	112	0.1	2.9
CG1054	cgp1160	227	228	0	0	1021	343	0.0007	-10.4804	1.361e-05	24054	0	17	0	3.7
CG1055	xseB	245	246	0	124	232	259	0.2541	-1.97653	0.0054784	29277	1	9	0.2	1.8
CG1056	xseA	1253	1254	371	124	4058	4226	0.0599	-4.0613	0	734903	2	86	0.1	3.4
CG1057	ispH	977	978	0	0	0	0	1	0		478242	0	0	0	0
CG1058	cgp1165	830	831	0	0	1987	1529	0.0003	-11.7027	2e-08	332816	0	30	0	1.8
CG1059	cgp1166	1481	1482	372	495	3356	3951	0.1188	-3.07339	0	1040500	6	84	0.2	2.8
CG106	htpG	1826	1827	371	9643	4470	6777	0.8904	-0.167475	0	1578709	7	109	0.2	3
CG1060	cgp1167	182	183	0	0	86	1037	0.0009	-10.1178	2.232e-05	15280.5	0	16	0	4.4
CG1061	metP	1691	1692	496	124	5789	4080	0.0629	-3.9908	0	1.33765e+06	5	116	0.1	3.4
CG1062	cmt5	1235	1236	247	496	3347	5249	0.0865	-3.53116	0	708366	5	97	0.2	3.9
CG1063	cgp1171	1085	1086	0	0	131	257	0.0026	-8.58727	2.99e-05	581010	0	16	0	0.7
CG1064	cgp1172	281	282	0	0	438	461	0.0011	-9.82828	0.00041114	38211	0	11	0	2
CG1065	cgp1173	299	300	124	124	292	827	0.2223	-2.16942	0.00360981	43508	2	13	0.3	2.2
CG1066	arcB	833	830	124	124	1360	1250	0.0954	-3.38987	2e-08	330776	2	35	0.1	2.1
CG1067	cgp1175	503	504	0	0	803	1690	0.0004	-11.2877	9.42e-06	122472	0	18	0	1.8
CG1068	cgp1176	557	558	0	0	917	898	0.0006	-10.7027	1e-08	147312	0	31	0	2.8
CG1069	tnp9a	1208	1209	866	124	4167	2751	0.1432	-2.8039	0	688660	6	76	0.2	3.1
CG107	amn	1409	1410	247	372	2835	2757	0.1109	-3.17267	0	943392	4	77	0.1	2.7
CG1070	cgp1179	3056	3057	496	372	6068	6485	0.0692	-3.85308	0	4.48636e+06	7	133	0.1	2.2
CG1071	cgp1180	1469	1466	744	496	3641	3360	0.1772	-2.49655	0	1031466	10	69	0.3	2.4
CG1072	cgp1182	221	222	0	0	27	24	0.0192	-5.70275	0.0788837	24420	0	2	0	0.5
CG1073	cgp1183	335	336	0	371	625	755	0.2694	-1.89218	0.00025834	53939	2	17	0.3	2.5
CG1074	tnp10c	293	290	0	124	815	475	0.0968	-3.36885	0.00011607	39879	1	17	0.2	2.9
CG1075	tnp10b	377	378	124	0	661	440	0.1134	-3.14051	0.00021014	68801.5	1	15	0.1	2
CG1076	Name=tnp10a'	146	147	0	124	169	116	0.4371	-1.19396	0.159069	10658	1	3	0.3	1
CG1077	cgp1189	188	189	0	0	0	39	0.025	-5.32193	0.159939	17766	0	1	0	0.3
CG1078	cgp1190	368	369	0	0	102	165	0.0037	-8.07826	0.0125153	67158	0	5	0	0.7
CG1079	cgp1191	500	501	0	0	812	1050	0.0005	-10.9658	1.84e-06	120240	0	23	0	2.3
CG108	cgp0126	581	582	124	0	403	974	0.0907	-3.46275	2.96e-06	162968	1	23	0.1	2
CG1080	cgp1192	803	804	124	124	2112	1690	0.0655	-3.93236	0	307549	2	41	0.1	2.5
CG1081	cgp1193	323	324	0	0	846	742	0.0006	-10.7027	1.8e-07	48438	0	25	0	3.9
CG1082	cgp1194	656	657	371	124	1138	1283	0.2048	-2.28771	2.96e-06	207634	3	28	0.2	2.1
CG1083	cgp1195	1697	1698	496	248	4349	4183	0.0873	-3.51787	0	1375500	6	88	0.2	2.6
CG1084	cgp1197	599	600	0	0	675	1099	0.0006	-10.7027	4e-08	171600	0	28	0	2.3
CG1085	cgp1198	500	497	0	0	944	1005	0.0005	-10.9658	5.46e-06	118783	0	20	0	2
CG1086	cgp1199	335	336	0	0	328	233	0.0018	-9.11779	0.0007297	54768	0	10	0	1.5
CG1087	cgp1200	122	123	0	0	176	82	0.0039	-8.00231	0.0414225	7380	0	3	0	1.2
CG1088	cgp1201	155	149	0	0	18	595	0.0016	-9.28771	0.00118878	10430	0	9	0	3
CG1089	cgp1202	1958	1959	248	372	4480	3432	0.0785	-3.67116	0	1849391	5	77	0.1	2
CG109	cgp0127	554	555	248	124	1852	757	0.1429	-2.80692	4e-08	144888	3	37	0.3	3.3
CG1090	cgp1203	1364	1365	124	124	3070	2315	0.0462	-4.43596	0	887966	2	66	0.1	2.4
CG1091	cgp1204	689	690	124	248	1383	1281	0.14	-2.8365	4.94e-06	229785	3	27	0.2	2
CG1092	cgp1205	707	704	0	124	724	677	0.0892	-3.48681	1.05e-06	239370	1	26	0.1	1.8
CG1093	cgp1206	764	765	124	248	1421	2346	0.099	-3.33643	1e-08	278493	3	41	0.2	2.7
CG1094	cgp1207	1643	1644	372	372	2298	2776	0.1468	-2.76808	0	1300506	6	68	0.2	2.1
CG1095	cgp1208	398	385	0	0	1505	1896	0.0003	-11.7027	3.3e-07	69492.5	0	25	0	3.2
CG1096	cgp1209	344	345	0	124	863	572	0.087	-3.52284	0.00034922	57270	1	15	0.1	2.2
CG1097	cgp1210	92	93	0	0	301	557	0.0012	-9.70275	0.0221708	4138.5	0	4	0	2.2
CG1098	cgp1211	476	477	0	0	664	696	0.0007	-10.4804	1.609e-05	109710	0	17	0	1.8
CG1099	cgp1212	1220	1221	0	0	2819	3866	0.0001	-13.2877	0	702686	0	70	0	2.9
CG11	cgp0013	263	264	0	0	689	672	0.0007	-10.4804	1.51e-06	32076	0	21	0	4
CG110	cgp0128	551	552	0	124	1202	1641	0.044	-4.50635	8.44e-06	146834	1	21	0.1	1.9
CG1100	tnp1a	1310	1311	0	0	0	0	1	0		859360	0	0	0	0
CG1101	cgp1214	1076	1076	0	372	1708	2649	0.0856	-3.54625	0	546664	3	65	0.1	3
CG1102	nadC	839	840	0	248	1825	1868	0.0674	-3.89111	0	336437	2	41	0.1	2.4
CG1103	nadA	1286	1287	248	124	3532	3056	0.0566	-4.14305	0	780630	3	79	0.1	3.1
CG1104	cgp1218	644	645	0	372	2371	1186	0.1048	-3.25429	2.92e-06	199968	3	28	0.2	2.2
CG1105	cgp1219	923	924	248	372	3174	2453	0.1103	-3.1805	0	398796	5	69	0.3	3.7
CG1106	cgp1220	602	603	0	0	347	656	0.001	-9.96578	3.28e-06	175774	0	20	0	1.7
CG1107	cgp1221	344	345	0	0	748	710	0.0007	-10.4804	2.9e-06	56062.5	0	21	0	3
CG1108	lplA	1058	1059	0	248	3968	4112	0.0308	-5.02093	0	527946	2	65	0.1	3.1
CG1109	cgp1224	413	414	0	124	1320	635	0.0639	-3.96804	1.38e-05	81768.5	1	20	0.1	2.4
CG111	putA	3458	3459	744	496	7367	8387	0.0788	-3.66566	0	5.68188e+06	10	188	0.1	2.7
CG1110	pcaK	1295	1296	124	0	3652	3319	0.0179	-5.8039	0	784748	1	86	0	3.3
CG1111	cgp1226	1187	1188	372	0	2640	3100	0.065	-3.94342	0	667116	3	70	0.1	2.9
CG1112	cgp1227	605	606	0	0	1274	798	0.0005	-10.9658	3e-08	174831	0	29	0	2.4
CG1113	cgp1228	1340	1337	0	372	1815	2290	0.0908	-3.46116	0	859068	3	55	0.1	2.1
CG1114	cgp1229	755	752	0	0	1741	1494	0.0003	-11.7027	0	269592	0	37	0	2.5
CG1115	cgp1230	533	534	0	0	1053	1172	0.0004	-11.2877	6.3e-07	136437	0	23	0	2.2
CG1116	chaA	1052	1053	620	248	2620	1623	0.2048	-2.28771	0	528722	7	59	0.3	2.8
CG1117	cgp1232	704	705	0	124	854	1913	0.0452	-4.46753	2e-08	237591	1	32	0.1	2.3
CG1118	cgp1233	725	692	0	248	1530	1655	0.0782	-3.67669	1e-07	229066	2	32	0.1	2.3
CG1119	cgp1234	2342	2343	0	496	3801	6461	0.0484	-4.36885	0	2.61842e+06	4	112	0.1	2.4
CG112	cgp0131	935	936	372	124	2651	3596	0.0795	-3.6529	0	408630	4	67	0.2	3.6
CG1120	tpx	497	498	0	0	1381	870	0.0004	-11.2877	1.2e-07	117528	0	26	0	2.6
CG1121	cgp1237	1778	1775	124	124	4526	4274	0.0283	-5.14305	0	1498143	2	92	0.1	2.6
CG1122	cgp1238	956	957	0	248	3285	2486	0.0431	-4.53617	0	427810	2	66	0.1	3.4
CG1123	cgp1239	902	903	372	124	4369	2646	0.0708	-3.82011	0	387413	4	49	0.2	2.7
CG1124	cgp1240	368	369	124	0	926	66	0.1259	-2.98965	7.98e-06	64399	1	21	0.1	2.8
CG1125	cgp4004	260	247	0	0	86	307	0.0025	-8.64386	0.00694129	29763.5	0	6	0	1.2
CG1126	cgp1241	263	125	124	0	732	31	0.1636	-2.61176	0.0284823	7501	1	7	0.4	2.8
CG1127	cgp1242	389	390	124	248	603	921	0.2446	-2.0315	0.0001032	72556.5	3	21	0.4	2.7
CG1128	cgp1243	836	837	248	496	1548	2332	0.192	-2.38082	0	329874	6	56	0.4	3.3
CG1129	cgp1244	347	348	0	0	495	202	0.0014	-9.48036	0.00041929	58638	0	12	0	1.7
CG113	cgp0133	1523	1524	124	124	2768	3101	0.0424	-4.55979	0	1114831	2	64	0.1	2.1
CG1130	cgp1245	1202	1203	0	0	4519	2801	0.0001	-13.2877	0	688116	0	59	0	2.5
CG1131	cgp1246	539	540	620	743	813	1091	0.716	-0.481969	0.00117208	140759	10	29	0.9	2.7
CG1132	cgp1247	716	717	0	248	932	1781	0.0917	-3.44693	2e-08	245228	2	36	0.1	2.5
CG1133	cgp1248	1922	1923	0	0	241	0	0.0041	-7.93016	0.00232145	1.84127e+06	0	8	0	0.2
CG1134	cgp1249	1502	1489	0	0	545	132	0.0015	-9.38082	8.854e-05	1.09814e+06	0	14	0	0.5
CG1135	mshB	872	873	372	124	3378	2098	0.0907	-3.46275	0	351030	4	75	0.2	4.3
CG1136	cgp1251	413	414	0	124	1696	1512	0.039	-4.68038	2.72e-06	81150.5	1	23	0.1	2.8
CG1137	fdxC	317	318	0	247	192	195	0.6392	-0.645661	0.00967791	49453	1	8	0.2	1.3
CG1138	dapC	1103	1104	124	0	1	3	25	4.64386	0.0899878	607754	1	4	0	0.2
CG1139	cgp1254	590	591	0	0	170	309	0.0021	-8.89539	0.00400271	172572	0	7	0	0.6
CG114	cgp0134	1388	1389	0	248	2370	1555	0.0634	-3.97937	0	925802	2	58	0.1	2.1
CG1140	cgp1255	1187	1188	0	0	867	1468	0.0004	-11.2877	1.033e-05	694980	0	18	0	0.8
CG1141	dapD	893	890	248	124	1450	2390	0.0971	-3.36438	0	373397	3	54	0.2	3
CG1142	cgp1257	1391	1392	248	124	3417	2487	0.0632	-3.98393	0	927116	3	63	0.1	2.3
CG1143	dapD2	899	900	372	0	5097	3036	0.0459	-4.44536	0	367268	3	89	0.2	4.9
CG1144	dapE	1109	1110	495	496	4090	2223	0.1571	-2.67024	0	587297	7	61	0.3	2.7
CG1145	cgp1261	770	771	372	248	3696	2100	0.1071	-3.22297	0	280674	5	48	0.3	3.1
CG1146	folP2	833	834	0	124	1863	3645	0.0227	-5.46116	0	326106	1	53	0.1	3.2
CG1147	cgp1263	716	717	0	247	1775	1223	0.0827	-3.59597	1e-08	245584	1	33	0.1	2.3
CG1148	cgp1264	308	309	0	0	1	218	0.0045	-7.79586	0.003937	46659	0	7	0	1.1
CG1149	cgp1265	167	168	0	0	143	188	0.003	-8.38082	0.0224291	13776	0	4	0	1.2
CG115	cgp0135	368	369	124	0	709	708	0.0882	-3.50308	0.00035569	65684	1	15	0.1	2
CG1150	rlmA	866	867	124	0	1478	1320	0.0447	-4.48358	0	355924	1	48	0.1	2.8
CG1151	cgp1267	1496	1497	247	867	2750	5071	0.1425	-2.81097	0	1057818	7	91	0.2	3
CG1152	glgA	1172	1173	372	372	2878	2626	0.1353	-2.88577	0	652864	6	67	0.3	2.9
CG1153	glgC	1217	1218	1361	619	6159	3412	0.207	-2.2723	0	688946	7	98	0.3	4
CG1154	cgp1270	641	642	0	0	256	547	0.0012	-9.70275	4.934e-05	201267	0	15	0	1.2
CG1155	sigE	641	642	0	0	105	123	0.0044	-7.82828	0.0070711	204156	0	6	0	0.5
CG1156	cgp1272	494	495	0	0	287	187	0.0021	-8.89539	0.0125556	121275	0	6	0	0.6
CG1157	cgp1273	470	471	0	0	160	140	0.0033	-8.24332	0.0415776	110214	0	3	0	0.3
CG1158	mrp	1127	1128	0	0	189	85	0.0036	-8.11779	0.0126218	633372	0	5	0	0.2
CG1159	cgp1275	581	582	248	248	911	1854	0.1797	-2.47634	1.94e-06	161527	4	31	0.3	2.7
CG116	cgp0136	317	318	0	0	594	570	0.0009	-10.1178	0.00013686	48495	0	14	0	2.2
CG1160	mgtE1	1292	1285	124	124	1665	1821	0.0714	-3.80793	0	797364	2	48	0.1	1.9
CG1161	cgp1277	497	498	0	0	1431	1086	0.0004	-11.2877	1e-08	116283	0	32	0	3.2
CG1162	cgp1278	668	669	0	372	1113	1014	0.1753	-2.5121	2.33e-05	216771	3	24	0.2	1.8
CG1163	cgp1279	533	525	0	124	1345	588	0.0646	-3.95232	1.9e-07	130734	1	29	0.1	2.8
CG1164	odhA	3665	3666	0	0	10	151	0.0062	-7.33352	9.023e-05	6694116	0	14	0	0.2
CG1165	cgp1281	3743	3744	989	744	12815	11017	0.0728	-3.77992	0	6599419	11	236	0.1	3.2
CG1166	cgp1282	719	720	0	124	1319	1597	0.0429	-4.54288	0	245894	1	38	0.1	2.6
CG1167	aroE2	806	807	496	0	3414	3023	0.0772	-3.69526	0	295050	4	82	0.2	5.1
CG1168	cgp1284	1679	1680	868	1238	6490	7828	0.1471	-2.76513	0	1.31255e+06	15	136	0.4	4
CG1169	cgp1285	653	654	124	124	123	1375	0.1661	-2.58988	1.172e-05	207006	2	23	0.2	1.8
CG117	cgp0138	1955	1956	372	371	5063	5094	0.0732	-3.77201	0	1809442	5	111	0.1	2.8
CG1170	cgp1286	803	804	0	0	930	728	0.0006	-10.7027	3e-08	311550	0	29	0	1.8
CG1171	cgp1287	473	474	0	124	1300	564	0.067	-3.8997	0	104293	1	36	0.1	3.8
CG1172	cgp1288	1217	1218	0	0	2695	2017	0.0002	-12.2877	0	710094	0	53	0	2.2
CG1173	cgp1289	1349	1342	124	248	2796	3892	0.0558	-4.16359	0	855582	3	71	0.1	2.6
CG1174	metE	2237	2238	248	496	3006	3216	0.1197	-3.0625	0	2409390	6	91	0.1	2
CG1175	cgp1291	347	348	124	0	1130	1053	0.0572	-4.12784	2.324e-05	57425.5	1	19	0.1	2.7
CG1176	cgp1292	1412	1413	372	0	4257	1842	0.0611	-4.03268	0	948186	3	75	0.1	2.7
CG1177	cgp1293	326	327	0	0	485	285	0.0013	-9.58727	0.00127465	51993	0	9	0	1.4
CG1178	cgp1294	896	897	0	124	1656	1833	0.0358	-4.8039	4e-08	388854	1	31	0.1	1.7
CG1179	cgp1295	794	795	124	124	2738	1824	0.0546	-4.19496	0	297353	2	49	0.1	3.1
CG118	cgp0139	782	783	248	124	1101	1019	0.1759	-2.50717	8e-08	294051	3	35	0.2	2.2
CG1180	cgp1296	1649	1650	371	0	2310	2405	0.0789	-3.66383	0	1.31508e+06	1	58	0	1.8
CG1181	cydC	1556	1553	372	124	2721	3515	0.0797	-3.64928	0	1.15627e+06	4	68	0.1	2.2
CG1182	cydD	1535	1536	248	372	1590	2341	0.1579	-2.66292	0	1.13981e+06	5	58	0.2	1.9
CG1183	cydB	1001	1002	124	0	1681	1275	0.0423	-4.5632	0	484477	1	36	0	1.8
CG1184	cydA	1541	1542	496	0	3506	3904	0.0671	-3.89754	0	1129589	4	84	0.1	2.7
CG1185	cgp1302	2915	2916	124	248	7111	4876	0.0311	-5.00694	0	4.05333e+06	3	140	0.1	2.4
CG1186	cgp1303	395	395	0	0	979	996	0.0005	-10.9658	5.21e-06	74260	0	20	0	2.5
CG1187	cgp1304	767	768	124	0	1236	461	0.0736	-3.76415	1.81e-06	286087	1	24	0.1	1.6
CG1188	cgp1305	1406	1407	742	744	4173	6759	0.136	-2.87832	0	921154	10	112	0.4	4
CG1189	cgp1307	2198	2199	124	0	260	0	0.4789	-1.0622	0.00330924	2407909	1	10	0	0.2
CG119	cgp0141	392	393	0	0	811	172	0.001	-9.96578	5.2e-06	73491	0	19	0	2.4
CG1190	cgp1308	689	690	248	371	983	1063	0.3029	-1.72309	7.7e-07	228097	4	33	0.3	2.4
CG1191	cgp1309	1592	1593	0	496	1156	2539	0.1345	-2.89432	0	1.22431e+06	4	62	0.1	1.9
CG1192	tfdF	1070	1071	124	124	1898	2133	0.0618	-4.01625	0	547308	2	51	0.1	2.4
CG1193	cgp1311	887	888	124	124	1793	2836	0.0538	-4.21625	0	370327	2	56	0.1	3.2
CG1194	cgp1312	473	474	124	0	938	1439	0.0526	-4.24879	6e-08	105472	1	30	0.1	3.2
CG1195	cgp1313	542	543	248	248	2893	1654	0.1093	-3.19363	1.08e-06	139830	4	33	0.4	3
CG1196	putP	1574	1575	371	0	3678	2508	0.0601	-4.05649	0	1192318	2	63	0.1	2
CG1197	cgp1316	3104	3097	496	0	5098	3872	0.0554	-4.17397	0	4.62858e+06	4	112	0.1	1.8
CG1198	cgp1317	854	855	248	0	1762	1477	0.0769	-3.70087	0	348442	2	43	0.1	2.5
CG1199	cgp1318	1175	1176	0	124	3226	2482	0.0219	-5.51293	0	653870	1	65	0	2.8
CG12	cgp0014	248	245	0	0	644	647	0.0008	-10.2877	1.392e-05	27930	0	17	0	3.5
CG120	sixA	512	509	124	496	492	1257	0.3549	-1.49452	0.00019185	124740	5	24	0.5	2.4
CG1200	cgp1319	2630	2631	372	620	7973	6838	0.067	-3.8997	0	3.25878e+06	8	166	0.2	3.2
CG1201	lipP	776	777	124	0	1403	1904	0.0378	-4.72547	0	286333	1	41	0.1	2.6
CG1202	cgp1321	380	381	0	248	1932	933	0.0869	-3.5245	7.1e-07	67643.5	2	29	0.3	3.8
CG1203	cgp1322	539	540	124	248	526	1144	0.2232	-2.16359	2.343e-05	140157	3	24	0.3	2.2
CG1204	rosR	488	489	0	0	1920	1359	0.0003	-11.7027	2.1e-07	113448	0	26	0	2.7
CG1205	cgp1325	215	216	124	0	452	111	0.2216	-2.17397	0.00314154	22360	1	10	0.2	2.3
CG1206	cgp1326	422	423	124	0	1603	1068	0.0468	-4.41735	6e-08	83338	1	30	0.1	3.5
CG1207	cgp1327	752	753	0	124	830	671	0.0832	-3.58727	7.529e-05	277484	1	17	0.1	1.1
CG1208	cgp1328	236	237	124	0	393	481	0.1429	-2.80692	0.00544878	27139	1	9	0.2	1.9
CG1209	ctpC	1877	1878	743	372	2737	2383	0.2179	-2.19826	0	1704476	8	71	0.2	1.9
CG121	mtlD	1511	1512	248	124	4326	2987	0.051	-4.29336	0	1087941	3	77	0.1	2.5
CG1210	cgp1330	632	633	0	0	602	841	0.0007	-10.4804	1.3e-07	192116	0	26	0	2.1
CG1211	cgpt5025	72	73	0	0	0	0	1	0		2664.5	0	0	0	0
CG1212	cgp1332	1583	1584	372	619	5873	5404	0.088	-3.50635	0	1166860	7	120	0.2	3.8
CG1213	argS	1652	1653	0	0	0	1	0.5	-1	0.158802	1365378	0	1	0	0
CG1214	lysA	1337	1338	124	0	602	493	0.1141	-3.13163	8e-08	875736	1	31	0	1.2
CG1215	cgp1335	605	602	248	124	648	1362	0.1855	-2.43051	4.91e-06	174000	3	29	0.2	2.4
CG1216	cgp1336	122	123	0	124	222	451	0.1855	-2.43051	0.00291432	7013	1	10	0.4	4.1
CG1217	hom	1337	1338	744	248	1815	1753	0.2782	-1.84581	0	857161	8	65	0.3	2.4
CG1218	thrB	929	930	0	0	2348	1361	0.0003	-11.7027	0	412455	0	45	0	2.4
CG1219	arnR	692	693	124	0	744	529	0.0981	-3.3496	6.2e-07	231473	1	27	0.1	1.9
CG122	rbtT	1337	1338	372	124	4639	3803	0.0589	-4.08559	0	833678	4	98	0.1	3.7
CG1220	narI	779	780	124	248	1701	2572	0.0873	-3.51787	0	288240	3	44	0.2	2.8
CG1221	narJ	686	687	124	0	3738	1275	0.0249	-5.32771	0	222252	1	41	0.1	3
CG1222	narH	1595	1595	0	372	2919	2682	0.0666	-3.90833	0	1217042	3	76	0.1	2.4
CG1223	narG	3746	3747	992	744	10521	12825	0.0744	-3.74855	0	6.616e+06	14	231	0.2	3.1
CG1224	narK	1337	1338	496	124	2326	3539	0.1059	-3.23923	0	845738	5	80	0.2	3
CG1225	mog	488	489	248	124	1457	1118	0.1448	-2.78787	6.49e-05	114939	3	22	0.3	2.2
CG1226	cgp1347	1868	1869	372	619	3763	4580	0.1189	-3.07218	0	1651494	7	109	0.2	2.9
CG1227	cgp1348	1010	1011	124	0	2099	2091	0.0298	-5.06854	0	484788	1	53	0	2.6
CG1228	cgp1349	1403	1404	124	1856	3609	4103	0.2568	-1.96128	0	934603	9	85	0.3	3
CG1229	mob	563	564	124	124	1787	2351	0.0602	-4.05409	0	148071	2	41	0.2	3.6
CG123	sucR	848	849	0	248	1899	1643	0.0703	-3.83033	0	345132	2	38	0.1	2.2
CG1230	cgp1351	1211	1212	248	124	3231	2455	0.0656	-3.93016	0	698757	3	62	0.1	2.6
CG1231	moaA	1208	1209	248	371	2778	3200	0.1037	-3.26951	0	696449	4	61	0.2	2.5
CG1232	fadD4	1727	1717	496	124	1305	1257	0.2423	-2.04513	0	1430386	5	56	0.1	1.6
CG1233	rho	2288	2289	0	0	177	54	0.0043	-7.86145	0.0126481	2614038	0	5	0	0.1
CG1234	prfA	1076	1076	0	0	0	0	1	0		578888	0	0	0	0
CG1235	cgp1356	839	840	124	124	0	0	249	7.96	0.0787114	353640	2	0	0.1	0
CG1236	cgp1358	650	651	0	0	0	1	0.5	-1	0.159027	211575	0	1	0	0.1
CG1237	cgp1359	1148	1149	0	0	1	4	0.1667	-2.58467	0.0416099	658377	0	3	0	0.1
CG1238	cgp1360	449	450	0	0	19	431	0.0022	-8.82828	0.0125438	100125	0	5	0	0.6
CG1239	cgp1361	242	243	0	0	0	2	0.3333	-1.58511	0.078863	29281.5	0	2	0	0.4
CG124	xylB	1382	1383	248	15575	2431	3185	2.8172	1.49426	0	914284	6	68	0.2	2.5
CG1240	atpB	935	936	0	0	0	2	0.3333	-1.58511	0.158914	437580	0	1	0	0.1
CG1241	atpE	242	243	0	0	0	0	1	0		29524.5	0	0	0	0
CG1242	atpF	566	567	0	0	0	0	1	0		160744	0	0	0	0
CG1243	atpH	815	816	0	0	0	0	1	0		332928	0	0	0	0
CG1244	atpA	1643	1644	0	0	51	1	0.0189	-5.72547	0.012638	1347258	0	5	0	0.2
CG1245	atpG	977	978	0	0	1	0	0.5	-1	0.158903	477753	0	1	0	0.1
CG1246	atpD	1451	1452	0	0	1	1	0.3333	-1.58511	0.0786853	1052700	0	2	0	0.1
CG1247	atpC	374	375	0	0	1	1	0.3333	-1.58511	0.0787879	69937.5	0	2	0	0.3
CG1248	cgp1370	473	474	0	0	336	350	0.0015	-9.38082	0.00042871	109731	0	11	0	1.2
CG1249	cgp1371	692	693	124	124	2016	2031	0.0615	-4.02327	0	226980	2	40	0.1	2.9
CG125	panC	839	835	124	124	1573	1879	0.0721	-3.79386	0	332768	2	40	0.1	2.4
CG1250	cgp1372	287	288	0	124	383	346	0.1712	-2.54625	0.00316719	40179	1	10	0.2	1.7
CG1251	cgp1373	455	456	0	0	317	785	0.0009	-10.1178	6.1e-07	98724	0	23	0	2.5
CG1252	cgp1374	305	306	0	0	391	1056	0.0007	-10.4804	5.2e-07	43299	0	23	0	3.8
CG1253	cgp1375	923	924	0	372	1808	2418	0.0882	-3.50308	0	404292	3	55	0.2	3
CG1254	ssuD1	1145	1146	124	372	5286	2769	0.0617	-4.01859	0	619491	4	69	0.2	3
CG1255	ssuC	770	771	248	0	1397	2036	0.0725	-3.78588	0	279900	2	47	0.1	3
CG1256	ssuB	731	732	124	124	1584	1397	0.0835	-3.58208	0	254758	2	38	0.1	2.6
CG1257	ssuA	959	960	371	124	1854	818	0.1856	-2.42973	1e-08	443566	3	39	0.2	2
CG1258	glgB	2195	2196	867	620	8104	7264	0.0968	-3.36885	0	2.24585e+06	11	168	0.3	3.8
CG1259	glgE	2027	2028	124	372	1512	2863	0.1136	-3.13797	0	1982484	4	78	0.1	1.9
CG126	panB	809	810	0	124	1215	1085	0.0543	-4.2029	7e-08	316314	1	31	0.1	1.9
CG1260	cgp1383	872	873	371	124	835	1593	0.2042	-2.29195	0	365380	2	38	0.1	2.2
CG1261	cgp1384	800	801	248	0	3008	1579	0.0543	-4.2029	0	300002	2	56	0.1	3.5
CG1262	cgp1385	1163	1164	495	743	2820	4169	0.1773	-2.49574	0	642650	7	71	0.3	3
CG1263	fixA	788	789	0	0	0	2	0.3333	-1.58511	0.0787154	310472	0	2	0	0.1
CG1264	fixB	953	954	0	0	2	0	0.3333	-1.58511	0.158909	454581	0	1	0	0.1
CG1265	nifS1	1130	1131	0	0	46	40	0.0115	-6.44222	0.00403735	635622	0	7	0	0.3
CG1266	cgp1390	143	144	0	0	21	73	0.0105	-6.57347	0.0414532	10152	0	3	0	1
CG1267	cgp1391	1148	1145	372	0	2965	1864	0.0772	-3.69526	0	622354	3	61	0.1	2.7
CG1268	cgp1392	227	228	0	0	44	223	0.0037	-8.07826	0.0225135	25536	0	4	0	0.9
CG1269	cgp1393	506	433	372	0	884	392	0.2921	-1.77547	0.00029839	90300	3	19	0.3	2.2
CG127	cgp0150	953	954	0	0	1475	954	0.0004	-11.2877	1e-08	440271	0	31	0	1.6
CG1270	speE2	944	945	248	124	2393	1489	0.0961	-3.37932	0	423876	3	52	0.2	2.8
CG1271	cgp1395	1142	1143	372	371	4811	5620	0.0713	-3.80995	0	608150	4	85	0.2	3.7
CG1272	cgp1396	398	399	0	124	325	684	0.1238	-3.01392	0.00062615	77211	1	13	0.1	1.6
CG1273	trmU	1097	1098	0	0	0	175	0.0057	-7.45482	0.022701	600606	0	4	0	0.2
CG1274	cgp1398	992	989	248	247	2308	1483	0.1308	-2.93457	0	466854	3	48	0.2	2.4
CG1275	cgp1399	1463	1464	248	620	2050	4801	0.1268	-2.97937	0	1.01907e+06	7	80	0.2	2.7
CG1276	cgp1400	713	714	0	124	3140	3219	0.0197	-5.66566	0	238484	1	47	0.1	3.3
CG1277	ligA	2042	2043	0	0	1	3	0.2	-2.32193	0.0227237	2.08284e+06	0	4	0	0.1
CG1278	cgp1402	665	666	0	619	1546	2825	0.1418	-2.81807	4.3e-07	211817	4	35	0.3	2.6
CG1279	gatC	299	300	124	0	0	0	125	6.96578	0.159463	45150	1	0	0.2	0
CG128	mag	569	570	0	124	1158	864	0.0618	-4.01625	4.98e-06	156469	1	22	0.1	1.9
CG1280	gatA	1493	1494	0	0	0	0	1	0		1116018	0	0	0	0
CG1281	cgp1405	851	852	496	0	2464	1481	0.126	-2.9885	0	345968	4	46	0.2	2.7
CG1282	cgp1408	320	321	0	0	531	490	0.001	-9.96578	8.59e-06	48631.5	0	18	0	2.8
CG1283	pfk	1031	1032	0	0	662	18	0.0015	-9.38082	0.00014972	525804	0	13	0	0.6
CG1284	rbsR	1109	1096	0	248	2019	1149	0.0786	-3.66933	0	579804	2	40	0.1	1.8
CG1285	rbsA	1574	1575	248	248	5445	3627	0.0548	-4.18968	0	1.16164e+06	4	105	0.1	3.3
CG1286	rbsC	974	971	248	0	1492	943	0.1022	-3.29053	0	453974	2	38	0.1	2
CG1287	rbsB	944	945	248	0	1727	2984	0.0528	-4.24332	0	425736	2	47	0.1	2.5
CG1288	rbsD	371	372	248	124	918	957	0.1988	-2.33061	0.00027962	66223.5	3	19	0.4	2.6
CG1289	cgp1417	638	639	0	124	644	514	0.1079	-3.21223	1.499e-05	198097	1	20	0.1	1.6
CG129	cgp0152	656	657	0	124	1414	1254	0.0468	-4.41735	7e-08	206307	1	31	0.1	2.4
CG1290	cgp1418	1016	1017	0	0	1860	3189	0.0002	-12.2877	0	491720	0	50	0	2.5
CG1291	cgp1419	1007	1008	248	124	2244	1963	0.0886	-3.49655	0	482864	3	54	0.1	2.7
CG1292	gatB	1505	1506	0	0	0	0	1	0		1134018	0	0	0	0
CG1293	cgp1421	674	675	496	371	2189	1117	0.2625	-1.92961	5.7e-07	217090	6	38	0.4	2.8
CG1294	cgp1423	1076	1077	248	372	1790	1333	0.1988	-2.33061	1e-08	559023	5	47	0.2	2.2
CG1295	lysE	701	698	124	124	547	985	0.1624	-2.62238	1.45e-06	234898	2	27	0.1	1.9
CG1296	lysG	872	873	372	248	2254	1945	0.1479	-2.75731	2e-08	364959	5	42	0.3	2.4
CG1297	gst	1079	1080	124	372	5069	3888	0.0555	-4.17137	0	539530	4	87	0.2	4
CG1298	cgp1427	554	555	124	0	1996	1084	0.0406	-4.62238	2.9e-06	147913	1	23	0.1	2.1
CG1299	cgp1429	1058	1059	124	0	3346	1452	0.026	-5.26534	0	528989	1	61	0	2.9
CG13	gyrA	2570	2571	0	0	45	0	0.0217	-5.52616	0.00405868	3296022	0	7	0	0.1
CG130	hde	926	927	0	248	2190	2586	0.0521	-4.26257	0	406050	2	53	0.1	2.9
CG1300	ilvD	1841	1842	0	0	1171	1519	0.0004	-11.2877	0	1634775	0	67	0	1.8
CG1301	cgp1433	635	636	0	0	1778	655	0.0004	-11.2877	0	191118	0	36	0	2.8
CG1302	cgp1434	1601	1602	248	248	3992	3258	0.0685	-3.86775	0	1224803	4	78	0.1	2.4
CG1303	ilvB	1880	1881	991	867	8079	7296	0.1209	-3.04811	0	1653762	12	140	0.3	3.7
CG1304	ilvN	518	519	866	124	3480	2780	0.1583	-2.65927	0	119441	5	65	0.5	6.3
CG1305	ilvC	1016	1017	124	124	1054	271	0.1878	-2.41273	1.1e-07	501916	2	32	0.1	1.6
CG1306	cgp1438	500	501	124	124	995	1083	0.1198	-3.0613	3e-08	117506	2	34	0.2	3.4
CG1307	cgp1440	269	270	0	124	216	360	0.2166	-2.20689	0.0291564	35777	1	6	0.2	1.1
CG1308	cgp1441	884	885	0	0	2905	1727	0.0002	-12.2877	0	365948	0	59	0	3.3
CG1309	cgp1442	434	435	0	124	366	878	0.1004	-3.31617	2.422e-05	90703	1	19	0.1	2.2
CG131	cgp0154	605	606	124	0	1069	835	0.0656	-3.93016	0	172723	1	37	0.1	3.1
CG1310	cgp1443	371	344	0	0	418	437	0.0012	-9.70275	7.952e-05	56760	0	14	0	2
CG1311	cgp1444	488	489	0	0	1840	828	0.0004	-11.2877	1.06e-06	114182	0	22	0	2.2
CG1312	cgp1447	956	957	0	0	350	124	0.0021	-8.89539	0.00014925	451704	0	13	0	0.7
CG1313	cgp1448	1817	1818	124	620	4382	2537	0.1077	-3.21491	0	1580904	6	86	0.2	2.4
CG1314	cgp1449	1619	1620	124	867	3446	4262	0.1287	-2.95792	0	1258020	6	73	0.2	2.3
CG1315	serA	1592	1593	124	496	2959	2644	0.1108	-3.17397	0	1198101	5	94	0.2	3
CG1316	cgp1452	869	870	0	0	1175	1157	0.0004	-11.2877	0	361485	0	39	0	2.2
CG1317	leuB	1022	1023	372	248	4169	3352	0.0826	-3.59771	0	491614	5	68	0.2	3.3
CG1318	cgp1454	1031	1032	124	0	2609	2851	0.0229	-5.44851	0	501567	1	61	0	3
CG1319	cgp1456	1856	1857	0	494	5108	4387	0.0521	-4.26257	0	1643510	2	89	0.1	2.4
CG132	cgp0155	560	540	0	0	1872	1276	0.0003	-11.7027	0	136890	0	33	0	3.1
CG1320	dnaQ2	593	594	0	247	1197	427	0.1526	-2.71217	7.448e-05	171672	1	18	0.1	1.5
CG1321	cgp1458	806	807	372	0	1245	749	0.187	-2.41889	1e-08	311142	3	39	0.2	2.4
CG1322	cgp1459	605	606	0	248	588	1634	0.112	-3.15843	3e-08	173946	2	34	0.2	2.8
CG1323	entC	1130	1131	0	0	95	8	0.0096	-6.70275	0.0416095	637884	0	3	0	0.1
CG1324	gltS	1481	1482	0	0	68	0	0.0145	-6.1078	0.0786846	1096680	0	2	0	0.1
CG1325	cgp1464	215	216	0	0	152	545	0.0014	-9.48036	0.00218688	22464	0	8	0	1.9
CG1326	cgp1465	473	474	247	247	1688	3363	0.098	-3.35107	4.6e-07	105962	2	30	0.2	3.2
CG1327	cgp1466	524	525	124	124	663	366	0.2417	-2.04871	1.926e-05	132576	2	22	0.2	2.1
CG1328	cgp1467	455	456	0	0	996	1004	0.0005	-10.9658	2e-07	98268	0	25	0	2.7
CG1329	cgp1468	305	306	248	124	931	1768	0.1381	-2.85621	3.366e-05	43771.5	3	23	0.5	3.8
CG133	cysR	1145	1146	12857	14217	60	211	99.5404	6.63721	0	687757	61	6	2.7	0.3
CG1330	cgp1469	182	183	0	248	1052	704	0.1417	-2.81909	4.331e-05	15107.5	2	20	0.5	5.5
CG1331	cgpt5026	71	72	0	0	0	0	1	0		2592	0	0	0	0
CG1332	cgpt5027	72	73	0	0	0	0	1	0		2664.5	0	0	0	0
CG1333	cgpt5028	71	72	0	0	0	0	1	0		2592	0	0	0	0
CG1334	cgpt5029	72	73	0	0	0	0	1	0		2664.5	0	0	0	0
CG1335	cgp4019	92	93	0	0	0	268	0.0037	-8.07826	0.02217	4138.5	0	4	0	2.2
CG1336	cgp1470	95	96	0	0	0	0	1	0		4608	0	0	0	0
CG1337	cgp1471	122	123	0	0	93	159	0.004	-7.96578	0.0122011	7257	0	5	0	2
CG1338	cgpt5030	75	76	0	0	245	0	0.0041	-7.93016	0.16186	2850	0	1	0	0.7
CG1339	cgp1472	131	132	124	0	219	604	0.1517	-2.72071	0.00916375	8251.5	1	8	0.4	3
CG134	cgp0158	1274	1275	124	619	3741	5289	0.0824	-3.60121	0	772085	5	73	0.2	2.9
CG1340	cgp1473	185	186	124	0	323	16	0.3676	-1.44379	0.0290503	16835	1	6	0.3	1.6
CG1341	cgp1474	1145	1146	0	124	1321	798	0.059	-4.08314	3e-08	638904	1	32	0	1.4
CG1342	cgp1475	326	323	0	0	481	342	0.0012	-9.70275	0.00223646	50872.5	0	8	0	1.2
CG1343	thiC	1763	1760	124	124	3458	2297	0.0433	-4.52949	0	1490756	2	68	0.1	1.9
CG1344	cgp1478	461	462	0	0	361	1084	0.0007	-10.4804	3.12e-06	102102	0	20	0	2.2
CG1345	glgP1	2387	2388	372	23857	6304	9335	1.5492	0.631523	0	2671398	10	164	0.2	3.4
CG1346	cgp1480	125	126	124	0	305	3	0.4045	-1.30579	0.0898563	7750	1	4	0.4	1.6
CG1347	cgp1481	158	159	0	0	123	373	0.002	-8.96578	0.00037913	11766	0	11	0	3.5
CG1348	cgp1482	1409	1410	0	248	4837	2745	0.0328	-4.93016	0	939798	2	79	0.1	2.8
CG1349	cgp1483	752	753	0	0	1661	1427	0.0003	-11.7027	0	267315	0	43	0	2.9
CG135	cgp0159	518	519	0	0	715	616	0.0008	-10.2877	2e-08	127155	0	29	0	2.8
CG1350	cgp1484	479	480	0	124	1087	518	0.0778	-3.68409	0.00012367	111603	1	16	0.1	1.7
CG1351	cgp1485	566	549	0	0	1845	1291	0.0003	-11.7027	0	140818	0	37	0	3.4
CG1352	cgp1486	707	708	124	0	1740	1718	0.0361	-4.79186	0	235068	1	46	0.1	3.2
CG1353	leuC	1445	1446	620	743	6557	6528	0.1042	-3.26257	0	974802	10	111	0.3	3.8
CG1354	leuD	593	594	248	248	1762	2758	0.1099	-3.18574	5e-08	166356	4	38	0.3	3.2
CG1355	cgp1490	1010	1011	372	248	2137	2622	0.1305	-2.93788	0	480833	5	66	0.2	3.3
CG1356	cgp1491	158	159	0	0	161	70	0.0043	-7.86145	0.022411	12322.5	0	4	0	1.3
CG1357	gpsA	998	999	0	0	413	0	0.0024	-8.70275	0.0416065	497502	0	3	0	0.2
CG1358	ddlA	1082	1083	0	0	1	0	0.5	-1	0.158879	585903	0	1	0	0
CG1359	cgp1494	980	981	0	0	220	55	0.0036	-8.11779	0.0023048	477256	0	8	0	0.4
CG136	cgp0160	422	423	0	124	688	460	0.1088	-3.20025	7.156e-05	86086	1	17	0.1	2
CG1360	thiL	917	918	0	0	1	0	0.5	-1	0.158919	420903	0	1	0	0.1
CG1361	ung	749	749	124	0	3056	2484	0.0226	-5.46753	0	259546	1	58	0.1	3.9
CG1362	cgp1497	1703	1704	0	0	119	2	0.0082	-6.93016	0.0126393	1447548	0	5	0	0.1
CG1363	cgp1498	2123	2124	371	0	2179	3929	0.0609	-4.03741	0	2165484	2	87	0	2
CG1364	cgp1499	215	216	0	0	216	92	0.0032	-8.28771	0.0124037	22788	0	5	0	1.2
CG1365	cgp1500	584	584	248	124	1021	901	0.194	-2.36587	1e-08	159769	3	40	0.3	3.4
CG1366	coaD	482	483	0	0	0	0	1	0		116644	0	0	0	0
CG1367	cgp1502	764	765	124	0	1084	1649	0.0457	-4.45166	0	277706	1	40	0.1	2.6
CG1368	cgp1503	950	951	124	372	1839	2798	0.1072	-3.22162	0	429424	4	53	0.2	2.8
CG1369	cgp1504	983	984	248	496	1727	2144	0.1924	-2.37782	0	453756	6	70	0.3	3.6
CG137	cgp0161	1943	1944	620	618	6549	5617	0.1018	-3.29619	0	1763517	8	139	0.2	3.6
CG1370	cgp1505	809	810	248	248	1920	1487	0.1458	-2.77794	0	311898	4	44	0.2	2.7
CG1371	cgp1506	980	981	248	124	2634	2630	0.0708	-3.82011	0	452286	3	65	0.2	3.3
CG1372	cgpt5031	76	77	0	0	0	1	0.5	-1	0.161818	2926	0	1	0	0.6
CG1373	polA	2669	2666	124	124	171	472	0.3866	-1.37109	6.096e-05	3529802	2	20	0	0.4
CG1374	cgp1526	1400	1401	372	0	3430	2952	0.0584	-4.09789	0	940104	3	63	0.1	2.2
CG1375	cgp1527	977	978	124	247	2996	2846	0.0637	-3.97256	0	449432	2	63	0.1	3.2
CG1376	dkgX	875	876	124	124	1950	1682	0.0685	-3.86775	0	364007	2	48	0.1	2.7
CG1377	cgp1529	161	162	0	0	0	104	0.0095	-6.71786	0.0789707	12960	0	2	0	0.6
CG1378	cgp1530	830	831	0	495	1352	2812	0.1191	-3.06975	4e-08	332002	2	35	0.1	2.1
CG1379	rpsA	1460	1461	0	0	0	0	1	0		1.06726e+06	0	0	0	0
CG138	cgp0162	1541	1538	248	372	3498	4605	0.0766	-3.70651	0	1.12587e+06	5	80	0.2	2.6
CG1380	ptsG	2051	2052	0	989	1970	2106	0.2428	-2.04216	0	2027446	2	78	0	1.9
CG1381	coaE	602	603	0	0	3	0	0.25	-2	0.159057	181503	0	1	0	0.1
CG1382	cgp1540	1085	1086	0	0	2166	2882	0.0002	-12.2877	0	557661	0	62	0	2.9
CG1383	cgp1541	509	510	371	0	1360	1470	0.1314	-2.92796	2.7e-07	122929	2	30	0.2	2.9
CG1384	cgp1542	248	167	0	0	111	49	0.0062	-7.33352	0.0224272	13610.5	0	4	0	1.2
CG1385	uriH	938	939	248	248	1968	1970	0.1262	-2.98622	0	419320	4	51	0.2	2.7
CG1386	uriT	1451	1452	124	248	3112	2914	0.0619	-4.01392	0	1001208	3	76	0.1	2.6
CG1387	rbsK1	923	916	248	248	2049	2564	0.1077	-3.21491	0	397132	4	55	0.2	3
CG1388	uriR	1040	1041	0	494	1765	2501	0.116	-3.1078	0	516881	1	49	0	2.4
CG1389	cgp1548	659	660	0	0	724	305	0.001	-9.96578	1.678e-05	212190	0	17	0	1.3
CG139	cgp0163	1463	1464	124	248	6569	5339	0.0313	-4.99769	0	990465	3	116	0.1	4
CG1390	cgp1549	332	333	0	124	378	853	0.1015	-3.30045	0.00020605	53118	1	15	0.2	2.3
CG1391	uvrB	2099	2100	248	248	4499	3758	0.0602	-4.05409	0	2127392	4	78	0.1	1.9
CG1392	uspA1	443	444	124	0	396	63	0.2717	-1.87991	0.00967786	97017	1	8	0.1	0.9
CG1393	qorR	383	384	124	248	659	961	0.2301	-2.11967	0.00078829	71047.5	3	18	0.4	2.3
CG1394	qor2	848	849	124	0	2711	1942	0.0269	-5.21625	0	336641	1	61	0.1	3.6
CG1395	cgp1555	2267	2268	372	372	5134	4572	0.0767	-3.70463	0	2451882	6	112	0.1	2.5
CG1396	cgp1556	914	915	866	867	3134	4125	0.2388	-2.06613	0	396302	9	59	0.5	3.2
CG1397	cgp1559	602	603	124	742	2212	2049	0.2034	-2.29761	0	169214	5	48	0.4	4
CG1398	uvrA	2849	2833	1115	371	9130	6659	0.0942	-3.40813	0	3768359	9	185	0.2	3.3
CG1399	cgp1562	2126	2127	124	248	5270	5112	0.0359	-4.79987	0	2139855	3	120	0.1	2.8
CG14	cgp0016	344	345	0	248	1050	761	0.1374	-2.86355	6.9e-07	55045.5	2	28	0.3	4.1
CG140	cgp0165	1733	1734	620	1114	4124	5781	0.1751	-2.51375	0	1407494	10	124	0.3	3.6
CG1400	infC	569	570	0	0	0	0	1	0		162450	0	0	0	0
CG1401	rpmL	194	195	0	0	0	0	1	0		19012.5	0	0	0	0
CG1402	rplT	383	384	124	0	330	0	0.3776	-1.40507	0.0511232	72961.5	1	5	0.1	0.7
CG1403	cgp1566	812	813	124	247	1431	3391	0.0771	-3.69713	4e-08	317496	2	35	0.1	2.2
CG1404	cgp1567	491	492	0	0	292	329	0.0016	-9.28771	0.00129954	118818	0	9	0	0.9
CG1405	ugpA	932	929	248	0	536	1867	0.1036	-3.2709	7.19e-06	421314	2	24	0.1	1.3
CG1406	ugpE	836	837	0	124	1803	1298	0.0403	-4.63308	4e-08	337736	1	31	0.1	1.9
CG1407	ugpB	1316	1317	248	248	4631	3733	0.0594	-4.07339	0	815954	4	84	0.2	3.2
CG1408	ugpC	1226	1227	124	248	3091	3274	0.0586	-4.09296	0	709875	3	73	0.1	3
CG1409	glpQ2	707	708	0	0	2599	386	0.0003	-11.7027	0	235410	0	44	0	3.1
CG141	cgp0166	1067	1068	124	371	1992	2122	0.1205	-3.05289	0	540466	3	60	0.1	2.8
CG1410	cgp1573	815	816	0	0	1765	898	0.0004	-11.2877	0	318240	0	36	0	2.2
CG1411	pheS	1037	1038	0	0	2	0	0.3333	-1.58511	0.0786996	537684	0	2	0	0.1
CG1412	cgp1575	2507	2508	0	0	1	2	0.25	-2	0.041622	3141270	0	3	0	0.1
CG1413	cgp1577	974	975	371	0	4556	3718	0.045	-4.47393	0	438298	1	80	0.1	4.1
CG1414	cgp1578	1385	1386	248	248	3910	2216	0.0811	-3.62415	0	915515	4	69	0.1	2.5
CG1415	cgp1579	404	405	0	0	1101	873	0.0005	-10.9658	5.24e-06	78165	0	19	0	2.3
CG1416	argC	1043	1044	247	124	3642	2241	0.0632	-3.98393	0	506914	2	75	0.1	3.6
CG1417	argJ	1166	1167	372	372	3017	3939	0.1071	-3.22297	0	640196	6	79	0.3	3.4
CG1418	argB	953	954	124	0	3495	2446	0.021	-5.57347	0	430741	1	52	0.1	2.7
CG1419	argD	1175	1176	248	372	2798	4728	0.0825	-3.59946	0	651011	5	75	0.2	3.2
CG142	cgp0167	758	759	371	248	2613	1619	0.1465	-2.77103	0	271397	4	49	0.3	3.2
CG1420	argF	959	960	248	0	1429	213	0.1516	-2.72166	7.23e-06	450254	2	24	0.1	1.2
CG1421	argR	515	516	124	0	639	0	0.1953	-2.35624	0.00063829	130038	1	13	0.1	1.3
CG1422	argG	1205	1206	867	372	5918	5425	0.1093	-3.19363	0	663554	9	118	0.4	4.9
CG1423	argH	1433	1434	248	495	6653	8080	0.0505	-4.30757	0	948017	4	118	0.1	4.1
CG1424	cgp1589	1145	1142	248	124	3216	2376	0.0667	-3.90617	0	616736	3	65	0.1	2.8
CG1425	cgp1590	1577	1578	124	372	2915	2463	0.0924	-3.43596	0	1193044	4	71	0.1	2.2
CG1426	cgp1591	614	601	0	0	844	864	0.0006	-10.7027	1e-08	171285	0	31	0	2.6
CG1427	cgp1592	179	180	124	0	0	0	125	6.96578	0.160003	16290	1	0	0.3	0
CG1428	tyrS	1262	1263	0	0	0	217	0.0046	-7.76415	0.0786907	796322	0	2	0	0.1
CG1429	uspA2	467	468	124	124	1212	1253	0.101	-3.30757	4.4e-07	103208	2	29	0.2	3.1
CG143	cgp0168	881	882	124	0	2304	2858	0.0242	-5.36885	0	367361	1	50	0.1	2.8
CG1430	cgpr5117	1523	1524	0	0	0	0	1	0		1161288	0	0	0	0
CG1431	cgpr5129	3085	3086	0	0	38	0	0.0256	-5.28771	0.0786664	4758612	0	2	0	0
CG1432	cgpr5105	119	120	0	0	0	0	1	0		7200	0	0	0	0
CG1433	cgp1597	1304	1305	371	0	840	536	0.2702	-1.8879	1.58e-06	835223	2	27	0.1	1
CG1434	cgp1598	986	987	0	248	779	1339	0.1175	-3.08927	1.9e-07	472796	2	31	0.1	1.6
CG1435	cgp1599	164	165	0	0	96	11	0.0093	-6.74855	0.00683741	13117.5	0	6	0	1.8
CG1436	cgp1600	821	822	124	0	843	770	0.0774	-3.69152	5.3e-06	329218	1	22	0.1	1.3
CG1437	ppnK	962	962	0	0	71	5	0.013	-6.26534	0.0126128	460317	0	5	0	0.3
CG1438	recN	1781	1782	0	372	4126	3507	0.0489	-4.35402	0	1.50674e+06	3	94	0.1	2.6
CG1439	cgp1603	1184	1185	248	247	3322	1465	0.1036	-3.2709	0	678456	3	44	0.1	1.9
CG144	cgp0170	719	720	124	0	1741	1790	0.0354	-4.82011	0	244088	1	44	0.1	3.1
CG1440	cgp1604	965	966	0	0	1505	1318	0.0004	-11.2877	3e-08	452571	0	32	0	1.7
CG1441	pyrG	1664	1665	619	124	2106	2974	0.1464	-2.77201	0	1320498	5	84	0.2	2.5
CG1442	cgp1607	671	668	0	124	650	517	0.107	-3.22432	6.2e-07	214775	1	26	0.1	1.9
CG1443	xerD	914	915	0	0	152	224	0.0027	-8.53282	0.00402838	415410	0	7	0	0.4
CG1444	cgp1609	1532	1533	0	124	5298	2611	0.0158	-5.98393	0	1110674	1	85	0	2.8
CG1445	parA2	872	873	0	0	1848	1059	0.0003	-11.7027	0	363168	0	41	0	2.3
CG1446	scpA	767	768	124	0	691	587	0.0977	-3.3555	8.98e-06	287240	1	22	0.1	1.4
CG1447	cgp1612	563	564	0	124	1717	713	0.0514	-4.28209	1e-08	150034	1	33	0.1	2.9
CG1448	sseA2	869	870	372	124	2456	2383	0.1027	-3.28349	0	358035	4	51	0.2	2.9
CG1449	scpB	578	579	0	495	1208	1365	0.1927	-2.37557	6e-07	159538	3	32	0.3	2.8
CG145	cgp0171	335	328	124	0	521	154	0.1849	-2.43518	0.00107173	51993	1	12	0.2	1.8
CG1450	rluA	962	963	0	0	7	0	0.125	-3	0.158907	463203	0	1	0	0.1
CG1451	cmk	710	707	0	124	0	108	1.1468	0.197614	0.159084	249219	1	3	0.1	0.2
CG1452	cgp1617	1631	1628	0	0	1	1	0.3333	-1.58511	0.0786815	1323564	0	2	0	0.1
CG1453	cgp1618	668	669	124	496	773	1044	0.3416	-1.54962	7.46e-05	216796	5	26	0.4	1.9
CG1454	cgp1619	500	501	124	0	1385	1140	0.0495	-4.33643	1.9e-07	118743	1	28	0.1	2.8
CG1455	cgp1620	815	816	124	124	1484	998	0.1003	-3.31761	1.8e-07	321112	2	32	0.1	2
CG1456	cgp1621	1418	1419	372	124	3518	2865	0.0779	-3.68223	0	953646	4	79	0.1	2.8
CG1457	cgp1622	1769	1766	124	0	4645	2871	0.0166	-5.91267	0	1.4817e+06	1	89	0	2.5
CG1458	cgp1623	806	807	0	0	28	0	0.0345	-4.85726	0.0226832	324010	0	4	0	0.2
CG1459	cgp1624	1550	1547	0	124	3102	3012	0.0204	-5.61529	0	1155623	1	54	0	1.7
CG146	panD	410	411	0	0	335	540	0.0011	-9.82828	8.136e-05	81583.5	0	15	0	1.8
CG1460	cgp1625	188	189	0	0	295	9	0.0033	-8.24332	0.0224647	17482.5	0	4	0	1.1
CG1461	cgpt5032	76	77	0	0	0	246	0.004	-7.96578	0.0412964	2849	0	3	0	1.9
CG1462	cgp1626	389	390	0	0	596	860	0.0007	-10.4804	1.73e-06	71955	0	21	0	2.7
CG1463	cgp1628	1181	1182	247	248	2175	4297	0.0766	-3.70651	0	660202	3	70	0.1	3
CG1464	secA2	2291	2292	0	0	2	3	0.1667	-2.58467	0.041621	2623194	0	3	0	0.1
CG1465	cgp1630	431	432	0	0	1332	793	0.0005	-10.9658	2e-08	87048	0	31	0	3.6
CG1466	cgp1631	758	759	0	124	950	131	0.1155	-3.11404	8.97e-06	280458	1	21	0.1	1.4
CG1467	cgp1632	635	636	124	0	509	688	0.1043	-3.26119	0.00063858	198434	1	13	0.1	1
CG1468	cgp1633	575	576	248	0	1008	227	0.2015	-2.31115	3.344e-05	160433	2	21	0.2	1.8
CG1469	cgp1635	512	513	0	0	515	818	0.0007	-10.4804	6.3e-07	125685	0	24	0	2.3
CG147	cgp0173	1661	1662	0	124	2307	1889	0.0298	-5.06854	0	1310521	1	88	0	2.6
CG1470	cgp1636	1451	1452	124	496	2273	3886	0.1008	-3.31043	0	1.00342e+06	5	76	0.2	2.6
CG1471	cgp1638	893	894	124	248	2166	2511	0.0797	-3.64928	0	379090	3	50	0.2	2.8
CG1472	cgp1639	1064	1065	124	0	2464	2076	0.0275	-5.18442	0	534117	1	64	0	3
CG1473	cgp1640	1382	1379	372	124	3885	3504	0.0673	-3.89325	0	906069	4	69	0.1	2.5
CG1474	cgp1641	1346	1347	124	372	1899	3771	0.0876	-3.51293	0	869548	4	61	0.1	2.3
CG1475	cgp1642	737	738	742	0	1128	1560	0.2763	-1.85569	1e-08	259078	3	39	0.2	2.6
CG1476	gnd	1454	1455	0	0	79	250	0.003	-8.38082	0.0416146	1056330	0	3	0	0.1
CG1477	cgp1644	464	465	124	0	535	626	0.1076	-3.21625	7.239e-05	104398	1	18	0.1	1.9
CG1478	cgp1645	584	585	124	124	1472	1752	0.0772	-3.69526	0	160014	2	40	0.2	3.4
CG1479	cgp1646	743	740	124	372	2332	1826	0.1195	-3.06492	1e-08	260144	4	41	0.3	2.8
CG148	cgp0174	1139	1140	372	124	2360	4046	0.0776	-3.6878	0	615632	4	64	0.2	2.8
CG1480	cgp1647	743	744	124	371	2888	1436	0.1147	-3.12406	0	262302	3	44	0.2	3
CG1481	cgp1648	881	853	618	619	3416	4639	0.1537	-2.70181	0	344256	6	53	0.4	3.1
CG1482	pctD	848	845	248	496	1917	3431	0.1393	-2.84373	0	334719	6	59	0.4	3.5
CG1483	pctC	806	807	619	372	2646	2182	0.2054	-2.28349	0	305533	6	56	0.4	3.5
CG1484	pctB	806	803	496	495	1521	2324	0.2579	-1.95512	0	302472	7	59	0.4	3.7
CG1485	pctA	1052	1053	372	742	4461	3854	0.1341	-2.89862	0	510851	6	91	0.3	4.3
CG1486	pgp1	704	705	0	0	1086	800	0.0005	-10.9658	1.3e-07	239348	0	28	0	2
CG1487	thiD1	2291	2292	248	620	5359	7070	0.0699	-3.83856	0	2491621	7	129	0.2	2.8
CG1488	thiM	806	807	124	248	1410	2045	0.1079	-3.21223	0	306303	3	52	0.2	3.2
CG1489	ndh	1403	1404	0	0	149	345	0.002	-8.96578	6.13e-06	972270	0	19	0	0.7
CG149	cgp0175	491	492	371	124	799	1015	0.2733	-1.87144	0.00049101	117354	3	18	0.3	1.8
CG1490	ufaA	1316	1317	372	372	3726	4133	0.0948	-3.39897	0	808144	6	96	0.2	3.6
CG1491	cgp1658	1388	1389	0	372	2427	1858	0.087	-3.52284	0	925818	3	59	0.1	2.1
CG1492	gpt	476	477	124	0	1178	1441	0.0477	-4.38987	1e-08	105903	1	34	0.1	3.6
CG1493	cgp1660	572	573	0	0	589	1047	0.0006	-10.7027	5.59e-06	158721	0	19	0	1.7
CG1494	cgp1661	998	999	0	124	731	653	0.0903	-3.46913	3e-08	483529	1	32	0.1	1.6
CG1495	cgp1662	485	486	248	0	1054	0	0.236	-2.08314	0.00075813	114946	2	15	0.2	1.5
CG1496	cgp1663	665	666	124	124	280	105	0.6451	-0.632405	0.078806	220450	2	6	0.2	0.5
CG1497	cgp1664	1517	1518	0	0	526	1270	0.0006	-10.7027	9e-08	1131669	0	27	0	0.9
CG1498	cgp1665	617	618	0	124	310	991	0.096	-3.38082	5.11e-06	184481	1	22	0.1	1.8
CG1499	cgp1668	191	192	0	0	32	619	0.0015	-9.38082	0.00216838	17664	0	8	0	2.1
CG15	cgpt5001	76	77	0	0	0	0	1	0		2964.5	0	0	0	0
CG150	cgp0176	782	783	372	124	2499	1931	0.1122	-3.15586	0	290523	4	48	0.3	3.1
CG1500	cgp1669	743	744	0	0	97	0	0.0102	-6.61529	0.158981	276396	0	1	0	0.1
CG1501	cgp1670	338	339	124	0	263	425	0.1814	-2.46275	0.00552552	56107	1	9	0.1	1.3
CG1502	cgp1671	398	399	0	0	120	20	0.0071	-7.13797	0.0226148	78802.5	0	4	0	0.5
CG1503	ppmC	812	813	0	0	82	129	0.0047	-7.73312	0.0126017	328452	0	5	0	0.3
CG1504	ppmN	1637	1638	124	620	3587	4848	0.0883	-3.50144	0	1278516	6	84	0.2	2.6
CG1505	cgp1675	563	564	0	619	1210	1179	0.2594	-1.94675	6.415e-05	153705	3	23	0.3	2
CG1506	lip3	1307	1308	0	0	3968	2725	0.0001	-13.2877	0	805074	0	77	0	2.9
CG1507	cgp1677	776	777	124	19405	2312	1360	5.3172	2.41067	1e-08	287923	3	39	0.2	2.5
CG1508	cobL	1292	1258	743	496	5711	3720	0.1315	-2.92687	0	735515	8	98	0.3	3.9
CG1509	cgp4020	362	363	0	124	1950	1526	0.036	-4.79586	0	58452	1	43	0.1	5.9
CG151	cgp0177	377	378	124	0	513	1512	0.0617	-4.01859	6e-08	65969	1	30	0.1	4
CG1510	cgp1679	248	245	0	0	283	744	0.001	-9.96578	0.00220447	29032.5	0	8	0	1.6
CG1511	cgp1680	740	741	248	372	1885	2472	0.1425	-2.81097	0	259380	5	49	0.3	3.3
CG1512	pepE	1139	1136	124	372	2888	2956	0.085	-3.55639	0	605552	4	76	0.2	3.3
CG1513	cgp1682	641	642	0	248	2780	2830	0.0444	-4.4933	0	193258	2	42	0.2	3.3
CG1514	cgp1683	2789	2790	372	496	8233	6963	0.0572	-4.12784	0	3.67331e+06	7	169	0.1	3
CG1515	tatC	944	945	0	0	261	333	0.0017	-9.20025	0.00025647	440842	0	12	0	0.6
CG1516	tatX	317	318	0	0	0	6	0.1429	-2.80692	0.159417	50403	0	1	0	0.2
CG1517	cgp1686	983	984	124	0	3961	2416	0.0196	-5.673	0	454128	1	64	0.1	3.3
CG1518	cgp1687	977	978	124	372	2494	2498	0.0995	-3.32916	0	453349	4	59	0.2	3
CG1519	pafA2	1448	1449	372	371	2219	1738	0.188	-2.4112	0	1.01005e+06	5	60	0.2	2.1
CG152	hrpB	2429	2430	248	124	4227	4707	0.0417	-4.58381	0	2.80676e+06	3	124	0.1	2.6
CG1520	pup	194	195	0	0	411	1826	0.0004	-11.2877	2.282e-05	17452.5	0	16	0	4.1
CG1521	pafA1	1544	1545	495	247	5035	4322	0.0794	-3.65472	0	1.12102e+06	4	102	0.1	3.3
CG1522	mpa	1583	1584	124	124	2222	3131	0.0465	-4.42663	0	1184111	2	92	0.1	2.9
CG1523	pimT	836	837	619	124	2207	5123	0.1015	-3.30045	0	326490	4	63	0.2	3.8
CG1524	pepC	1262	1263	248	124	3748	4562	0.0449	-4.47714	0	738285	3	97	0.1	3.8
CG1525	cgp1694	836	837	619	124	4145	2447	0.1128	-3.14816	0	331504	5	51	0.3	3
CG1526	cgp1695	260	261	124	0	992	443	0.087	-3.52284	0.00011388	32107	1	16	0.2	3.1
CG1527	cgp1696	1211	1212	248	496	4053	4564	0.0864	-3.53282	0	679470	6	98	0.2	4
CG1528	cgp1697	1580	1581	495	990	4616	5556	0.1461	-2.77497	0	1162386	9	121	0.3	3.8
CG1529	hisG	845	846	124	124	2841	2732	0.0447	-4.48358	0	333778	2	59	0.1	3.5
CG153	cgp0179	317	318	0	0	330	0	0.003	-8.38082	0.00698826	49608	0	6	0	0.9
CG1530	hisE	263	264	0	0	763	498	0.0008	-10.2877	8.6e-07	31944	0	22	0	4.2
CG1531	cgp1700	695	696	371	124	2116	1348	0.1431	-2.8049	0	228330	3	44	0.2	3.2
CG1532	metH	3590	3591	1487	496	13083	12743	0.0768	-3.70275	0	5996076	15	271	0.2	3.8
CG1533	cgp1702	572	573	124	0	827	888	0.0728	-3.77992	1e-06	157296	1	25	0.1	2.2
CG1534	cgp1703	1028	1025	0	0	1331	881	0.0005	-10.9658	5e-08	510962	0	28	0	1.4
CG1535	cgp1704	359	360	0	0	1509	1183	0.0004	-11.2877	0	59040	0	32	0	4.4
CG1536	arsC2	1112	1113	248	248	3856	2830	0.0743	-3.75049	0	591612	4	55	0.2	2.5
CG1537	cgp1706	422	423	0	124	1186	474	0.0753	-3.73121	0.00012302	86297	1	16	0.1	1.9
CG1538	cgp1707	641	642	124	0	1417	840	0.0554	-4.17397	1.486e-05	199987	1	22	0.1	1.7
CG1539	cgp1708	380	381	0	124	661	473	0.1101	-3.18311	0.00035864	70107	1	14	0.1	1.8
CG154	maa	677	651	247	0	971	1410	0.1041	-3.26396	3.03e-06	204749	1	24	0.1	1.8
CG1540	mshC	1262	1263	124	743	2863	1744	0.1884	-2.40813	0	764844	5	58	0.2	2.3
CG1541	bacA	881	882	0	0	1	281	0.0035	-8.15843	0.00709329	386316	0	6	0	0.3
CG1542	cgp1711	950	951	0	0	326	233	0.0018	-9.11779	5.074e-05	445068	0	15	0	0.8
CG1543	lppL	1025	1026	0	0	0	0	1	0		526338	0	0	0	0
CG1544	pyrD	1115	1116	0	0	296	1	0.0034	-8.20025	0.0416092	621054	0	3	0	0.1
CG1545	cgp1714	353	354	0	0	291	1823	0.0005	-10.9658	1.527e-05	59649	0	17	0	2.4
CG1546	cgp1715	305	306	0	0	0	0	1	0		46818	0	0	0	0
CG1547	cgp1716	1160	1161	0	0	90	0	0.011	-6.50635	0.158864	673380	0	1	0	0
CG1548	cgp1717	434	435	0	248	1588	811	0.1037	-3.26951	1.061e-05	90052	2	23	0.2	2.6
CG1549	cgp1718	533	534	372	372	2578	2219	0.1553	-2.68687	1e-08	132216	6	46	0.6	4.3
CG155	alkB	692	693	372	0	1902	1765	0.1017	-3.29761	1e-08	227331	3	44	0.2	3.2
CG1550	tetB	1799	1800	248	372	6227	5958	0.051	-4.29336	0	1.51214e+06	5	126	0.1	3.5
CG1551	tetA	1610	1611	124	868	4503	4858	0.1061	-3.2365	0	1.22374e+06	8	101	0.2	3.1
CG1552	cgpt5033	85	86	0	0	0	0	1	0		3698	0	0	0	0
CG1553	cgpt5034	88	89	0	0	0	0	1	0		3960.5	0	0	0	0
CG1554	cgp1722	611	612	248	0	1225	1414	0.0943	-3.4066	8.1e-07	179330	2	30	0.2	2.5
CG1555	cgp1724	1091	1092	124	372	1550	1919	0.1432	-2.8039	0	571172	4	50	0.2	2.3
CG1556	mcmB	2213	2206	496	371	5524	5734	0.0771	-3.69713	0	2.29668e+06	6	134	0.1	3
CG1557	mcmA	1850	1851	248	1361	5109	5266	0.1552	-2.6878	0	1.62632e+06	8	104	0.2	2.8
CG1558	cgp1727	776	777	248	248	2349	1777	0.1204	-3.05409	1e-08	287532	4	42	0.3	2.7
CG1559	cgp1728	599	600	124	0	3069	1135	0.0297	-5.07339	0	168904	1	38	0.1	3.2
CG156	tagA2	557	558	0	124	1276	1847	0.04	-4.64386	0	146204	1	35	0.1	3.1
CG1560	cgp1730	1298	1299	248	372	3394	2907	0.0985	-3.34373	0	797032	5	79	0.2	3
CG1561	cgp1731	428	429	0	0	1456	1911	0.0003	-11.7027	1e-08	85371	0	33	0	3.8
CG1562	cgp1732	845	846	0	124	720	1579	0.0543	-4.2029	8e-08	345599	1	30	0.1	1.8
CG1563	cgp1733	785	786	247	124	2779	2862	0.0659	-3.92358	0	287316	2	58	0.1	3.7
CG1564	hemH	1112	1109	247	0	576	411	0.251	-1.99424	0.00565973	610508	1	9	0	0.4
CG1565	cgp1735	1892	1893	248	372	3673	3983	0.0811	-3.62415	0	1.7048e+06	5	97	0.1	2.6
CG1566	cgp1736	500	501	0	124	88	382	0.2654	-1.91376	0.00109125	122749	1	12	0.1	1.2
CG1567	acn	2831	2832	0	0	0	0	1	0		4010112	0	0	0	0
CG1568	acnR	566	567	0	0	209	229	0.0023	-8.76415	1.648e-05	155925	0	18	0	1.6
CG1569	cgp1739	758	751	495	0	1509	1845	0.1478	-2.75828	2.2e-07	270759	3	34	0.2	2.3
CG157	cgp0183	680	681	0	0	1310	1386	0.0004	-11.2877	0	220304	0	34	0	2.5
CG1570	cgp1740	665	666	248	248	2296	3062	0.0927	-3.43129	0	204839	4	56	0.3	4.2
CG1571	cgp1741	254	255	0	0	729	390	0.0009	-10.1178	7.568e-05	30727.5	0	14	0	2.7
CG1572	cgp1742	269	270	0	124	1087	845	0.0647	-3.95009	0.00011297	34427	1	16	0.2	3
CG1573	cgp1743	1388	1389	495	619	3940	2409	0.1756	-2.50964	0	918278	7	76	0.3	2.7
CG1574	pacL	2678	2675	620	744	3798	4386	0.1668	-2.58381	0	3441723	11	114	0.2	2.1
CG1575	cgp1745	491	492	0	124	967	1165	0.0586	-4.09296	1.63e-06	115377	1	24	0.1	2.4
CG1576	cgp1753	1631	1632	2226	496	2900	2912	0.4684	-1.09419	0	1274792	8	78	0.2	2.4
CG1577	cgp1754	1478	1479	124	248	4572	3052	0.0489	-4.35402	0	1.04274e+06	3	73	0.1	2.5
CG1578	nanH	1199	1200	124	124	3576	2705	0.0396	-4.65836	0	675033	2	79	0.1	3.3
CG1579	tnp3b	710	711	0	0	0	0	1	0		252760	0	0	0	0
CG158	cgp0184	293	293	0	0	1351	526	0.0005	-10.9658	4.8e-06	40141	0	19	0	3.2
CG1580	cgp1758	587	588	0	124	1747	1310	0.0409	-4.61176	4e-08	164062	1	32	0.1	2.7
CG1581	cgp1759	413	414	618	0	70	154	2.7511	1.46001	0.0293603	84666	1	7	0.1	0.8
CG1582	sufU	449	450	0	0	0	149	0.0067	-7.22162	0.078765	100800	0	2	0	0.2
CG1583	sufS	1265	1265	0	124	0	288	0.4325	-1.20923	0.281929	799480	1	2	0	0.1
CG1584	sufC	758	759	0	0	1	0	0.5	-1	0.158974	287661	0	1	0	0.1
CG1585	sufD	1178	1179	0	0	1	0	0.5	-1	0.158861	694431	0	1	0	0
CG1586	sufB	1445	1446	0	0	0	1	0.5	-1	0.158823	1044735	0	1	0	0
CG1587	sufR	686	687	124	124	1381	1960	0.0745	-3.74662	3e-08	225004	2	34	0.1	2.5
CG1588	cgp1766	1775	1776	124	0	503	276	0.1603	-2.64115	0.00192467	1.56821e+06	1	11	0	0.3
CG1589	cgp1767	1022	1023	124	0	1572	1259	0.0441	-4.50308	0	495663	1	57	0	2.8
CG159	cgp0185	854	855	124	0	1576	1623	0.0391	-4.67669	0	344580	1	52	0.1	3
CG1590	cgp1768	806	807	124	124	1528	1375	0.0857	-3.54456	0	309512	2	44	0.1	2.7
CG1591	ctaA	1040	1041	0	0	9	70	0.0125	-6.32193	0.0226983	539758	0	4	0	0.2
CG1592	cgp1770	2351	2352	372	744	5736	6070	0.0946	-3.40202	0	2.61812e+06	9	142	0.2	3
CG1593	qor3	968	969	991	124	6292	4247	0.1059	-3.23923	0	429916	8	92	0.4	4.7
CG1594	ctaB	932	933	0	0	297	172	0.0021	-8.89539	0.00132317	431046	0	9	0	0.5
CG1595	tkt	2102	2103	0	0	177	439	0.0016	-9.28771	0.00405495	2203944	0	7	0	0.2
CG1596	tal	1082	1083	372	248	3738	2786	0.0952	-3.39289	0	543786	5	84	0.2	3.9
CG1597	zwf	1544	1545	124	0	1126	1591	0.046	-4.44222	0	1151048	1	57	0	1.8
CG1598	opcA	959	960	0	0	860	163	0.001	-9.96578	3e-08	446880	0	29	0	1.5
CG1599	pgl	707	708	0	0	125	173	0.0033	-8.24332	0.00025334	246384	0	12	0	0.8
CG16	cgpt5002	72	73	0	0	0	0	1	0		2664.5	0	0	0	0
CG160	cgp0186	344	345	372	0	1579	967	0.1464	-2.77201	2.55e-06	55227	3	28	0.4	4.1
CG1600	soxA	407	408	124	124	1246	1472	0.0916	-3.44851	3.61e-06	78551	2	26	0.2	3.2
CG1601	tnp13b	1403	1404	0	0	0	0	1	0		985608	0	0	0	0
CG1602	soxA'	842	843	247	124	2510	1943	0.0835	-3.58208	0	334284	2	52	0.1	3.1
CG1603	ocd	1148	1149	124	372	1180	2431	0.1376	-2.86145	2e-08	639454	4	40	0.2	1.7
CG1604	amt	1358	1355	124	124	4655	3628	0.0301	-5.05409	0	871302	2	73	0.1	2.7
CG1605	secG	233	234	0	0	0	0	1	0		27378	0	0	0	0
CG1606	ppc	2759	2760	619	1116	9792	13509	0.0745	-3.74662	0	3.5086e+06	13	237	0.2	4.3
CG1607	tpi	779	780	0	0	9	81	0.011	-6.50635	0.0415993	303030	0	3	0	0.2
CG1608	pgk	1217	1218	0	0	1	134	0.0074	-7.07826	0.0786922	740544	0	2	0	0.1
CG1609	gap	1004	1005	0	0	90	184	0.0036	-8.11779	0.00403258	501495	0	7	0	0.3
CG161	cgp0187	893	894	124	124	1231	1388	0.095	-3.39593	1e-08	384444	2	36	0.1	2
CG1610	cgp1792	983	984	0	0	117	0	0.0085	-6.87832	0.158901	483636	0	1	0	0.1
CG1611	cgp1793	1025	1026	619	124	4889	1995	0.1081	-3.20956	0	496146	5	65	0.2	3.2
CG1612	cgp1794	929	930	124	124	2329	2672	0.0498	-4.32771	0	406440	2	59	0.1	3.2
CG1613	uvrC	2090	2091	124	124	4711	2773	0.0333	-4.90833	0	2093143	2	92	0	2.2
CG1614	ribX	581	582	0	0	133	0	0.0075	-7.05889	0.0787388	168780	0	2	0	0.2
CG1615	ribH	479	480	372	0	2815	2178	0.0747	-3.74275	0	106338	3	43	0.3	4.5
CG1616	ribA	1268	1269	372	372	6561	6170	0.0585	-4.09542	0	736792	6	116	0.2	4.6
CG1617	ribC	635	636	124	372	1759	1818	0.1389	-2.84788	0	189252	4	45	0.3	3.5
CG1618	ribG	986	987	248	124	4120	4236	0.0446	-4.48681	0	455535	3	72	0.2	3.6
CG1619	rpe	659	660	0	0	85	115	0.005	-7.64386	0.00401028	215490	0	7	0	0.5
CG162	cgp0188	908	905	124	619	3226	2777	0.1239	-3.01275	0	385162	5	60	0.3	3.3
CG1620	fmu	1535	1532	124	496	6175	9561	0.0395	-4.662	0	1.07406e+06	5	140	0.2	4.6
CG1621	fmt	947	948	0	0	2	1	0.25	-2	0.0416051	447930	0	3	0	0.2
CG1622	def2	509	510	0	124	567	1938	0.0499	-4.32482	4e-08	122408	1	32	0.1	3.1
CG1623	priA	2066	2067	0	0	1	0	0.5	-1	0.158772	2135211	0	1	0	0
CG1624	metK	1223	1224	0	0	1	8	0.1	-3.32193	0.078692	747864	0	2	0	0.1
CG1625	dfp	1268	1269	0	0	6	57	0.0156	-6.00231	0.041612	803277	0	3	0	0.1
CG1626	cgp1809	287	288	0	0	0	63	0.0156	-6.00231	0.0225628	40896	0	4	0	0.7
CG1627	gmk	572	573	0	0	1	21	0.0435	-4.52284	0.0787402	163592	0	2	0	0.2
CG1628	ihf	320	321	0	0	0	1	0.5	-1	0.15941	51360	0	1	0	0.2
CG1629	pyrF	836	837	0	0	3	449	0.0022	-8.82828	0.0226856	348610	0	4	0	0.2
CG163	cgp0191	431	432	248	124	1971	1809	0.0987	-3.34081	3e-08	86420.5	3	34	0.3	3.9
CG1630	carB	3341	3342	0	0	177	22	0.005	-7.64386	0.00077725	5567772	0	10	0	0.1
CG1631	carA	1181	1182	0	0	117	78	0.0051	-7.61529	0.00710843	695016	0	6	0	0.3
CG1632	pyrC	1343	1344	0	0	18	1	0.05	-4.32193	0.0416131	901152	0	3	0	0.1
CG1633	pyrB	938	939	0	0	1	361	0.0028	-8.48036	0.00402957	437574	0	7	0	0.4
CG1634	pyrR	578	579	0	0	527	260	0.0013	-9.58727	0.00075161	164726	0	10	0	0.9
CG1635	cgp1819	1526	1527	0	0	112	214	0.0031	-8.33352	0.00044709	1157466	0	11	0	0.4
CG1636	cgp1821	479	480	0	0	469	747	0.0008	-10.2877	9.34e-06	110880	0	18	0	1.9
CG1637	cgp1822	464	454	495	124	1064	560	0.3815	-1.39025	0.0008223	99672	4	20	0.4	2.2
CG1638	cgp1823	188	189	124	0	219	132	0.3551	-1.4937	0.0510072	17484	1	5	0.3	1.3
CG1639	nusB	683	684	124	124	239	1756	0.1247	-3.00347	1.185e-05	226763	2	23	0.1	1.7
CG164	cgp0192	623	624	124	124	2393	3154	0.0449	-4.47714	0	183470	2	38	0.2	3
CG1640	efp	563	564	0	124	107	451	0.2236	-2.16101	7.464e-05	154544	1	17	0.1	1.5
CG1641	pepQ	1091	1092	372	124	3105	3117	0.0799	-3.64566	0	562988	4	65	0.2	3
CG1642	aroB	1097	1098	0	0	61	8	0.0143	-6.12784	0.0126203	600057	0	5	0	0.2
CG1643	aroK	557	558	0	124	447	264	0.1756	-2.50964	0.0895961	154845	1	4	0.1	0.4
CG1644	aroC	1223	1224	0	0	1	2	0.25	-2	0.078692	747864	0	2	0	0.1
CG1645	cgp1830	413	414	124	0	673	758	0.0873	-3.51787	8.11e-06	81564.5	1	21	0.1	2.5
CG1646	cgp1831	305	306	0	124	963	986	0.0641	-3.96353	2.7e-07	42848.5	1	27	0.2	4.4
CG1647	cgp1832	1076	1077	619	0	3754	2889	0.0933	-3.42198	0	550937	3	59	0.1	2.7
CG1648	cgp1833	959	956	124	124	3615	1981	0.0445	-4.49005	0	428795	2	61	0.1	3.2
CG1649	cgp1834	755	756	124	496	2668	3008	0.1094	-3.19232	1e-08	271442	5	43	0.3	2.8
CG165	pepO	1928	1929	495	124	4614	4685	0.0667	-3.90617	0	1770918	4	101	0.1	2.6
CG1650	aroE3	830	831	0	247	144	450	0.4168	-1.26257	0.051287	343621	1	5	0.1	0.3
CG1651	cgp1836	1169	1166	124	0	1184	295	0.0845	-3.5649	8e-08	662883	1	30	0	1.3
CG1652	cgp1837	548	549	0	0	0	158	0.0063	-7.31043	0.0787442	150152	0	2	0	0.2
CG1653	alaS	2666	2667	0	0	0	156	0.0064	-7.28771	0.0126517	3549777	0	5	0	0.1
CG1654	cgp1839	1379	1380	371	124	5379	5842	0.0442	-4.49981	0	886040	3	103	0.1	3.7
CG1655	cgp1840	1199	1200	124	372	2911	2038	0.1004	-3.31617	0	686468	4	61	0.2	2.5
CG1656	aspS	1826	1827	0	0	195	15	0.0047	-7.73312	0.0126416	1664397	0	5	0	0.1
CG1657	cgp1842	893	894	0	248	2437	1435	0.0643	-3.95904	0	380868	2	45	0.1	2.5
CG1658	cgp1843	2660	2661	744	495	11203	8468	0.063	-3.9885	0	3298718	9	194	0.2	3.6
CG1659	cgp1844	1859	1859	496	0	7674	7485	0.0328	-4.93016	0	1608129	4	135	0.1	3.6
CG166	cgp0194	743	744	372	0	2831	1818	0.0802	-3.64025	0	257097	3	56	0.2	3.8
CG1660	cgp1845	650	651	248	124	1439	2447	0.096	-3.38082	1e-08	200220	3	40	0.2	3.1
CG1661	cgp1846	596	580	124	124	1590	2346	0.0632	-3.98393	0	155466	2	47	0.2	4.1
CG1662	cgp1847	716	717	248	124	1869	3927	0.0643	-3.95904	0	239511	3	55	0.2	3.8
CG1663	cgp1848	1115	1116	124	248	2365	3718	0.0613	-4.02797	0	588735	3	64	0.1	2.9
CG1664	cgp1849	128	129	124	124	1026	488	0.1644	-2.60472	0.00324097	7679.5	2	12	0.8	4.7
CG1665	cgp1850	497	498	0	248	1245	2582	0.065	-3.94342	0	112824	2	48	0.2	4.8
CG1666	cgp1852	1349	1346	620	496	5569	2825	0.1331	-2.90942	0	856873	9	84	0.3	3.1
CG1667	glpD	1688	1689	496	124	6893	6665	0.0458	-4.44851	0	1325168	5	126	0.1	3.7
CG1668	hisS	1289	1290	0	0	0	1	0.5	-1	0.158843	831405	0	1	0	0
CG1669	cgp1856	641	642	495	124	1941	2540	0.1383	-2.85413	0	193916	3	43	0.2	3.3
CG167	cgp0195	965	962	0	371	2792	3130	0.0628	-3.99309	0	432460	2	65	0.1	3.4
CG1670	ppiB	842	843	0	0	1111	1574	0.0004	-11.2877	0	334671	0	49	0	2.9
CG1671	cgp1859	557	558	124	0	2005	3	0.0622	-4.00694	1.7e-06	149271	1	24	0.1	2.2
CG1672	cgp1860	275	276	0	0	400	184	0.0017	-9.20025	0.00221932	36984	0	8	0	1.4
CG1673	cgp1861	2282	2283	124	124	3147	4555	0.0323	-4.95232	0	2.50564e+06	2	93	0	2
CG1674	apt	557	558	0	0	521	1173	0.0006	-10.7027	2e-08	147591	0	31	0	2.8
CG1675	dciAE	1601	1602	248	248	4905	3873	0.0566	-4.14305	0	1211196	4	95	0.1	3
CG1676	secF	1211	1212	124	248	1958	1968	0.095	-3.39593	0	703006	3	56	0.1	2.3
CG1677	secD	1913	1914	124	124	2559	4356	0.036	-4.79586	0	1743707	2	95	0.1	2.5
CG1678	secN	365	366	124	0	1502	435	0.0645	-3.95456	3.963e-05	63868	1	18	0.1	2.5
CG1679	cgp1869	1091	1092	0	0	76	156	0.0043	-7.86145	8.751e-05	588588	0	14	0	0.6
CG168	iolR	761	762	619	248	1510	870	0.3646	-1.45561	5.3e-07	278576	5	36	0.3	2.4
CG1680	ruvA	620	621	0	0	237	104	0.0029	-8.42973	0.00043495	189405	0	11	0	0.9
CG1681	ruvC	665	666	0	0	200	344	0.0018	-9.11779	2.882e-05	216450	0	16	0	1.2
CG1682	cgp1872	755	756	0	0	101	225	0.0031	-8.33352	0.0415983	284634	0	4	0	0.3
CG1683	tesB2	848	849	124	371	2712	2180	0.1014	-3.30187	2e-08	345565	3	38	0.2	2.2
CG1684	cgp1874	476	477	124	248	981	1681	0.1401	-2.83547	0.00016646	109707	3	21	0.3	2.2
CG1685	cgp1875	464	465	0	0	324	156	0.0021	-8.89539	0.00398312	106485	0	7	0	0.8
CG1686	cgp1876	1085	1082	0	0	1	0	0.5	-1	0.158879	584821	0	1	0	0
CG1687	cgp1877	965	966	248	248	1620	2264	0.1279	-2.96691	0	442011	4	55	0.2	2.8
CG1688	pgsA1	659	659	0	0	0	116	0.0085	-6.87832	0.0787284	216482	0	2	0	0.2
CG1689	cgp1879	638	639	124	495	1555	2714	0.1452	-2.78389	3e-08	193023	4	40	0.3	3.1
CG169	iolC	956	957	371	124	3221	3125	0.0781	-3.67853	0	429744	3	62	0.2	3.2
CG1690	thrS	2102	2103	0	0	83	115	0.005	-7.64386	0.04162	2208150	0	3	0	0.1
CG1691	cgp1881	1208	1209	0	124	348	401	0.1667	-2.58467	0.00022576	722384	1	15	0	0.6
CG1692	cgp1883	548	549	0	0	452	459	0.0011	-9.82828	2.824e-05	146308	0	16	0	1.5
CG1693	cgp1884	614	615	0	0	7	2	0.1	-3.32193	0.078734	188498	0	2	0	0.2
CG1694	cgpt5035	75	76	0	0	0	0	1	0		2888	0	0	0	0
CG1695	cgpt5036	74	75	0	0	0	0	1	0		2812.5	0	0	0	0
CG1696	cgpt5037	70	71	0	0	0	0	1	0		2520.5	0	0	0	0
CG1697	cgpt5038	72	73	0	0	0	0	1	0		2664.5	0	0	0	0
CG1698	cgpt5039	74	75	0	0	0	0	1	0		2812.5	0	0	0	0
CG1699	cgpt5040	72	73	0	0	0	0	1	0		2664.5	0	0	0	0
CG17	cgp0018	1037	1038	0	248	2925	3634	0.038	-4.71786	0	515381	2	49	0.1	2.4
CG170	cgp0198	923	924	124	124	637	992	0.1528	-2.71028	0	408907	2	41	0.1	2.2
CG1700	cgp2072	308	309	0	0	872	352	0.0008	-10.2877	7.826e-05	45577.5	0	15	0	2.4
CG1701	cgp2073	359	360	0	0	777	897	0.0006	-10.7027	1.69e-06	61020	0	21	0	2.9
CG1702	cgp2074	347	348	0	0	200	838	0.001	-9.96578	7.965e-05	58116	0	14	0	2
CG1703	cgp2075	338	339	0	0	571	751	0.0008	-10.2877	4.566e-05	54918	0	15	0	2.2
CG1704	ribD	698	699	0	0	1247	1917	0.0003	-11.7027	2e-08	233816	0	30	0	2.1
CG1705	cgp2077	1256	1257	248	372	662	624	0.4825	-1.0514	0.00020547	778133	5	24	0.2	1
CG1706	cgp2078	410	407	495	124	365	1332	0.3651	-1.45364	2.497e-05	78383.5	4	26	0.5	3.2
CG1707	cgp2079	698	699	0	0	0	0	1	0		244300	0	0	0	0
CG1708	cgp2080	617	618	0	0	473	245	0.0014	-9.48036	5.66e-06	185091	0	19	0	1.5
CG1709	rnd	1211	1212	248	124	4084	2537	0.0563	-4.15072	0	695127	3	68	0.1	2.8
CG171	iolA	1514	1515	619	620	4011	4844	0.14	-2.8365	0	1078147	9	102	0.3	3.4
CG1710	dxs	1910	1911	0	124	2	1	31.25	4.96578	0.158814	1824051	1	3	0	0.1
CG1711	cgp2084	1238	1239	620	372	4827	4412	0.1075	-3.21759	0	709528	8	107	0.3	4.3
CG1712	cgp2085	863	864	124	124	1976	1942	0.0635	-3.9771	0	354262	2	47	0.1	2.7
CG1713	dut	449	450	0	0	0	1	0.5	-1	0.159194	101025	0	1	0	0.1
CG1714	cgp2087	551	552	0	0	195	0	0.0051	-7.61529	0.0787437	151800	0	2	0	0.2
CG1715	cgp2088	209	210	0	0	330	529	0.0012	-9.70275	0.00012789	20685	0	13	0	3.1
CG1716	cgp2089	293	294	0	124	600	1580	0.0573	-4.12532	7.27e-06	40281.5	1	21	0.2	3.6
CG1717	suhB	842	843	248	124	2626	2705	0.07	-3.8365	0	334707	3	53	0.2	3.1
CG1718	ppgK	752	753	124	0	2161	828	0.0418	-4.58035	1e-08	271464	1	33	0.1	2.2
CG1719	sigA	1484	1485	0	0	0	9	0.1	-3.32193	0.158818	1101870	0	1	0	0
CG172	iolB	890	891	372	248	4316	3111	0.0836	-3.58035	0	360945	5	89	0.3	5
CG1720	cgp2093	167	168	0	0	0	0	1	0		14112	0	0	0	0
CG1721	cgp2094	104	105	0	0	83	129	0.0047	-7.73312	0.0413864	5355	0	3	0	1.4
CG1722	cgp2095	1406	1407	0	37452	3666	3362	5.3284	2.4137	0	941359	3	73	0.1	2.6
CG1723	cgp2096	539	540	124	124	840	1197	0.1222	-3.03268	4.6e-07	138523	2	29	0.2	2.7
CG1724	cgp2097	1712	1713	0	0	74	121	0.0051	-7.61529	0.00712221	1.46205e+06	0	6	0	0.2
CG1725	cgp2098	239	236	0	0	160	720	0.0011	-9.82828	7.452e-05	26196	0	14	0	3
CG1726	cgp2099	497	484	0	124	942	594	0.0813	-3.6206	4.24e-05	113020	1	18	0.1	1.9
CG1727	cgp2100	1535	1536	1238	867	5786	8032	0.1524	-2.71407	0	1.10622e+06	13	110	0.4	3.6
CG1728	cgp2101	434	435	0	247	1608	1818	0.0724	-3.78787	6e-08	88314	1	30	0.1	3.4
CG1729	sigB	995	996	0	0	1491	267	0.0006	-10.7027	0	473598	0	45	0	2.3
CG173	iolD	1913	1914	495	0	9578	6903	0.0301	-5.05409	0	1701636	2	140	0.1	3.7
CG1730	dtxR	686	687	124	371	1807	1659	0.1431	-2.8049	0	222970	3	42	0.2	3.1
CG1731	galE	989	990	124	0	3497	1594	0.0245	-5.35107	0	461352	1	61	0.1	3.1
CG1732	cgp2105	1133	1130	372	248	1809	2729	0.1368	-2.86986	0	610840	5	56	0.2	2.5
CG1733	cgp2106	959	960	0	0	1725	3155	0.0002	-12.2877	0	437760	0	50	0	2.6
CG1734	cgp2107	2540	2541	372	372	4472	3949	0.0885	-3.49818	0	3077385	6	130	0.1	2.6
CG1735	oxyR	983	984	0	0	881	373	0.0008	-10.2877	3e-08	469860	0	30	0	1.5
CG1736	cgp2110	1091	1092	124	742	1970	3518	0.158	-2.662	0	565714	3	61	0.1	2.8
CG1737	cgp2111	3908	3909	744	124	7632	5695	0.0652	-3.93898	0	7279034	7	197	0.1	2.5
CG1738	nrdR	452	453	124	0	719	452	0.1067	-3.22837	7.278e-05	98988	1	17	0.1	1.9
CG1739	cgp2113	422	423	248	0	534	588	0.2217	-2.17332	0.00015613	86092.5	2	18	0.2	2.1
CG174	iolE	956	957	124	124	4145	4295	0.0295	-5.08314	0	418242	2	87	0.1	4.5
CG1740	lexA	761	762	0	0	763	83	0.0012	-9.70275	0.00075899	286512	0	10	0	0.7
CG1741	sugR	779	780	0	0	63	39	0.0097	-6.6878	0.0787162	303420	0	2	0	0.1
CG1742	cgp2116	962	959	124	124	3583	1818	0.0461	-4.43909	0	437804	2	50	0.1	2.6
CG1743	ptsI	1706	1707	0	0	389	992	0.0007	-10.4804	5e-08	1.43303e+06	0	28	0	0.8
CG1744	cgp2118	794	795	124	372	1836	2898	0.105	-3.25154	2e-08	301726	4	42	0.3	2.6
CG1745	fruK	992	985	124	0	755	838	0.0784	-3.673	2e-08	469366	1	33	0.1	1.7
CG1746	ptsF	2066	2067	124	0	1528	1556	0.0405	-4.62593	0	2072192	1	66	0	1.6
CG1747	ptsH	269	270	0	0	94	3	0.0102	-6.61529	0.0415369	36045	0	4	0	0.7
CG1748	cgp2124	527	528	124	0	770	1733	0.0499	-4.32482	0	126476	1	52	0.1	4.9
CG1749	uraA	1283	1284	496	372	3994	3383	0.1178	-3.08559	0	779524	7	83	0.3	3.2
CG175	iolG	1013	1014	247	248	3004	3615	0.0749	-3.73889	0	481200	3	74	0.1	3.6
CG1750	cgp2126	1460	1461	124	124	3883	3575	0.0334	-4.90401	0	998658	2	97	0.1	3.3
CG1751	cgp2127	758	759	0	0	149	105	0.0039	-8.00231	0.022679	286522	0	4	0	0.3
CG1752	cgp2128	539	536	248	124	885	1903	0.1337	-2.90293	7.93e-06	137499	3	27	0.3	2.5
CG1753	cgp2129	833	834	0	124	0	151	0.8224	-0.282088	0.281968	347361	1	2	0.1	0.1
CG1754	miaA	905	906	0	124	278	142	0.2969	-1.75195	0.00974788	407250	1	8	0.1	0.4
CG1755	cgp2131	611	612	0	372	765	2171	0.127	-2.9771	1e-08	175980	3	42	0.2	3.4
CG1756	cgp2132	1361	1362	0	124	3012	4237	0.0172	-5.86145	0	870339	1	85	0	3.1
CG1757	cgp2133	1025	1026	495	618	3599	2889	0.1717	-2.54204	0	495138	4	65	0.2	3.2
CG1758	cgp2134	671	672	0	0	483	452	0.0011	-9.82828	9.81e-06	219744	0	18	0	1.3
CG1759	cgp2135	1580	1581	372	1115	3759	4330	0.1839	-2.44301	0	1173438	10	107	0.3	3.4
CG176	iolH	878	879	124	0	1753	2792	0.0275	-5.18442	0	360408	1	60	0.1	3.4
CG1760	cgp2136	752	753	248	0	2239	1401	0.0684	-3.86986	1.7e-07	272597	2	31	0.1	2.1
CG1761	gluB	887	888	248	372	2805	2634	0.1142	-3.13037	0	368166	5	64	0.3	3.6
CG1762	gluC	686	687	372	0	2822	1620	0.084	-3.57347	3e-08	224331	3	37	0.2	2.7
CG1763	gluD	947	947	371	124	2647	2160	0.1032	-3.27649	0	424778	3	55	0.2	2.9
CG1764	recX	647	648	0	0	943	742	0.0006	-10.7027	1.94e-06	203148	0	22	0	1.7
CG1765	recA	1130	1131	0	124	99	433	0.2345	-2.09234	0.00038407	632235	1	14	0	0.6
CG1766	cgp2145	215	216	0	124	311	940	0.0998	-3.32482	0.00303545	22356	1	11	0.2	2.5
CG1767	cgp2146	680	681	124	248	1260	1214	0.1507	-2.73025	5e-08	220674	3	37	0.2	2.7
CG1768	cgp2147	605	606	124	124	60	20	3.0741	1.62016	0.129274	182714	2	5	0.2	0.4
CG1769	cgp2148	701	702	0	0	1	18	0.05	-4.32193	0.0787236	245700	0	2	0	0.1
CG177	iolP	1376	1377	248	372	4261	4124	0.0741	-3.75438	0	888298	5	93	0.2	3.4
CG1770	cgp2149	611	608	0	0	0	1	0.5	-1	0.159054	184528	0	1	0	0.1
CG1771	cgp2151	830	831	0	124	863	1658	0.0496	-4.33352	0	330749	1	36	0.1	2.2
CG1772	clgR	323	324	0	0	95	52	0.0068	-7.20025	0.0788099	52164	0	2	0	0.3
CG1773	cgp2153	518	519	0	0	1231	1077	0.0004	-11.2877	3.6e-07	128452	0	24	0	2.3
CG1774	pgsA2	605	606	0	0	232	223	0.0022	-8.82828	0.0040045	181497	0	7	0	0.6
CG1775	cgp2155	287	288	124	124	628	193	0.3029	-1.72309	0.00215722	39899	2	13	0.3	2.3
CG1776	cgp2156	119	120	0	0	200	0	0.005	-7.64386	0.0223005	6960	0	4	0	1.7
CG1777	terC	1109	1110	248	124	550	501	0.3546	-1.49574	0.0160987	611614	3	11	0.1	0.5
CG1778	ftsK	3032	3033	0	0	282	465	0.0013	-9.58727	5.28e-05	4576797	0	15	0	0.2
CG1779	cgp2159	635	636	124	124	500	1292	0.1389	-2.84788	2.4e-06	194634	2	26	0.2	2
CG178	cgp0207	1025	1026	620	372	4454	2757	0.1377	-2.8604	0	496672	8	69	0.4	3.4
CG1780	cgp2160	2156	2157	0	0	526	322	0.0012	-9.70275	8.942e-05	2.31123e+06	0	14	0	0.3
CG1781	dapA	905	906	0	0	0	1	0.5	-1	0.158922	409965	0	1	0	0.1
CG1782	thyX	752	753	124	124	1836	1380	0.0774	-3.69152	1.7e-07	272593	2	32	0.1	2.1
CG1783	dapB	746	747	0	0	706	95	0.0012	-9.70275	0.0125953	277137	0	5	0	0.3
CG1784	cgp2165	701	702	0	124	1883	1045	0.0427	-4.54962	0	232722	1	42	0.1	3
CG1785	gpsI	2261	2262	0	0	187	791	0.001	-9.96578	3.71e-06	2535702	0	21	0	0.5
CG1786	cgp2167	269	270	0	0	0	0	1	0		36450	0	0	0	0
CG1787	iunH2	950	951	496	124	3953	4604	0.0726	-3.78389	0	412829	5	89	0.3	4.7
CG1788	ribF	1025	1026	0	0	3	23	0.037	-4.75633	0.00710165	523260	0	6	0	0.3
CG1789	truB	893	894	124	0	1795	1584	0.037	-4.75633	0	378176	1	49	0.1	2.7
CG179	cgp0208	458	459	124	0	2670	1479	0.0301	-5.05409	0	95937	1	42	0.1	4.6
CG1790	pptA	653	643	0	0	6	347	0.0028	-8.48036	0.0226662	205438	0	4	0	0.3
CG1791	cgp2172	806	807	494	0	923	718	0.3015	-1.72977	1.84e-06	316356	1	24	0.1	1.5
CG1792	dinF	1313	1300	619	124	3751	3009	0.11	-3.18442	0	801532	4	72	0.2	2.8
CG1793	cgp2174	998	999	0	124	1123	2542	0.0341	-4.87408	0	473543	1	53	0.1	2.7
CG1794	rbfA	449	450	0	0	194	122	0.0032	-8.28771	0.0125438	100125	0	5	0	0.6
CG1795	cgp2176	3014	3015	0	0	0	101	0.0098	-6.673	0.0416237	4540590	0	3	0	0
CG1796	cgp2177	338	339	0	0	550	38	0.0017	-9.20025	0.00073016	55765.5	0	10	0	1.5
CG1797	nusA	998	999	0	0	2	0	0.3333	-1.58511	0.0787015	498002	0	2	0	0.1
CG1798	cgp2179	536	537	124	0	199	287	0.2567	-1.96184	0.00561063	142040	1	9	0.1	0.8
CG1799	cgp2180	818	819	124	248	2801	3544	0.0588	-4.08804	0	312074	3	62	0.2	3.8
CG18	cgp0019	896	897	742	0	2856	2600	0.1362	-2.8762	0	378148	4	58	0.2	3.2
CG180	cgp0209	347	348	0	0	557	842	0.0007	-10.4804	2.641e-05	57768	0	16	0	2.3
CG1800	cgp2181	1604	1605	248	495	4556	5562	0.0735	-3.76611	0	1206291	5	109	0.2	3.4
CG1801	cgp2182	926	919	248	0	2012	2337	0.0572	-4.12784	0	397496	2	58	0.1	3.2
CG1802	cgp2183	1034	1031	124	248	2629	5083	0.0484	-4.36885	0	501607	3	63	0.1	3.1
CG1803	cgp2184	1733	1734	248	124	5854	4444	0.0362	-4.78787	0	1403760	3	120	0.1	3.5
CG1804	proS	1766	1767	0	0	1	33	0.0286	-5.12784	0.0126405	1556727	0	5	0	0.1
CG1805	cgp2186	737	734	248	0	2164	2016	0.0596	-4.06854	0	253616	2	45	0.1	3.1
CG1806	cgp2187	761	762	248	0	2155	2117	0.0583	-4.10036	0	274714	2	44	0.1	2.9
CG1807	cgp2188	1103	1104	372	124	3000	3174	0.0805	-3.63487	0	576354	4	65	0.2	2.9
CG1808	cysG	752	753	0	0	46	260	0.0033	-8.24332	0.0226784	281998	0	4	0	0.3
CG1809	cgp2190	1424	1425	372	0	4235	3710	0.0469	-4.41427	0	953382	3	91	0.1	3.2
CG181	cgp0210	995	996	248	620	2460	3066	0.1572	-2.66933	0	470192	7	60	0.4	3
CG1810	cgp2191	902	903	0	124	707	1771	0.0504	-4.31043	8e-08	394620	1	31	0.1	1.7
CG1811	mqo	1502	1503	124	495	801	971	0.3497	-1.51581	0	1.09653e+06	4	48	0.1	1.6
CG1812	cgp2193	1025	1026	372	496	4262	5149	0.0923	-3.43753	0	482356	7	95	0.3	4.6
CG1813	mtr	1397	1398	372	124	5270	2850	0.0612	-4.03032	0	916475	4	92	0.1	3.3
CG1814	cgp2195	476	477	0	371	752	488	0.2998	-1.73793	0.0002702	110201	2	17	0.2	1.8
CG1815	cgp2196	359	360	124	0	309	0	0.4032	-1.31043	0.029075	63901	1	6	0.1	0.8
CG1816	cgp2197	731	728	124	124	1285	907	0.1135	-3.13924	5e-07	255177	2	29	0.1	2
CG1817	map2	875	876	0	0	0	0	1	0		383688	0	0	0	0
CG1818	pbp	1868	1869	496	248	5661	7847	0.0551	-4.1818	0	1.64764e+06	6	115	0.2	3.1
CG1819	cgp2200	632	629	124	248	1601	1509	0.1199	-3.0601	1e-08	186226	3	41	0.2	3.3
CG182	cgp0211	1235	1236	0	124	3777	4441	0.0152	-6.03978	0	719988	1	73	0	3
CG1820	cgp2201	1133	1134	0	124	953	2015	0.0421	-4.57004	0	619744	1	42	0	1.9
CG1821	cgp2202	959	960	124	0	2701	2244	0.0253	-5.30472	0	433932	1	57	0.1	3
CG1822	cgp2204	692	693	124	124	699	1064	0.1412	-2.82419	1.43e-06	231479	2	27	0.1	1.9
CG1823	ispG	1211	1212	0	0	1	311	0.0032	-8.28771	0.0126254	731442	0	5	0	0.2
CG1824	cgp2207	1214	1215	248	124	2357	2506	0.0767	-3.70463	0	708388	3	52	0.1	2.1
CG1825	dxr	1169	1170	0	0	2	0	0.3333	-1.58511	0.0786939	683280	0	2	0	0.1
CG1826	cgp2211	443	444	247	0	737	320	0.2344	-2.09296	7.262e-05	95023.5	1	18	0.1	2
CG1827	cgp2212	1580	1581	495	248	2462	2730	0.1433	-2.80289	0	1194560	5	76	0.2	2.4
CG1828	cgp2213	857	858	248	0	1415	1709	0.0797	-3.64928	1.1e-07	355230	2	32	0.1	1.9
CG1829	cgp2214	1100	1101	371	620	3587	6641	0.097	-3.36587	0	564351	7	83	0.3	3.8
CG183	cgp0212	1013	1014	248	124	2513	2775	0.0705	-3.82623	0	493840	3	43	0.1	2.1
CG1830	cgp2215	500	501	0	0	1548	618	0.0005	-10.9658	7e-08	118737	0	27	0	2.7
CG1831	cdsA	893	894	0	0	0	116	0.0085	-6.87832	0.158926	399171	0	1	0	0.1
CG1832	frr	557	558	0	0	0	3	0.25	-2	0.0787427	155124	0	2	0	0.2
CG1833	pyrH	731	732	0	0	9	69	0.0127	-6.29903	0.0125937	266082	0	5	0	0.3
CG1834	tsf	827	828	0	0	0	260	0.0038	-8.03978	0.0416012	341550	0	3	0	0.2
CG1835	rpsB	818	819	0	0	1	0	0.5	-1	0.158951	334971	0	1	0	0.1
CG1836	cgp2223	482	483	124	248	2704	1388	0.0911	-3.45641	1e-08	107974	3	40	0.3	4.1
CG1837	xerC	947	944	0	0	411	18	0.0023	-8.76415	0.00230347	441792	0	8	0	0.4
CG1838	cgp2226	1184	1185	124	0	4077	2883	0.018	-5.79586	0	664206	1	65	0	2.7
CG1839	cgp2227	1523	1520	248	496	5506	3668	0.0812	-3.62238	0	1092988	6	89	0.2	2.9
CG184	cgp0214	431	432	0	0	536	1286	0.0005	-10.9658	3.4e-07	88128	0	24	0	2.8
CG1840	cgp2228	368	355	0	0	388	153	0.0018	-9.11779	0.00128047	61415	0	9	0	1.3
CG1841	cgp2229	305	302	0	0	722	388	0.0009	-10.1178	0.00072391	44092	0	10	0	1.7
CG1842	rnhB	668	669	248	0	1371	1109	0.1004	-3.31617	1.151e-05	216763	2	23	0.1	1.7
CG1843	lepB	788	789	0	0	2	0	0.3333	-1.58511	0.158962	310866	0	1	0	0.1
CG1844	cgp2234	944	945	248	124	1097	262	0.2743	-1.86617	8.9e-06	435675	3	26	0.2	1.4
CG1845	rplS	341	342	0	0	0	1	0.5	-1	0.159364	58311	0	1	0	0.1
CG1846	thiE	665	662	248	124	1643	1606	0.1148	-3.12281	0	204931	3	46	0.2	3.5
CG1847	thiO	1124	1125	124	620	3317	2933	0.1192	-3.06854	0	599140	6	66	0.3	2.9
CG1848	thiS	197	198	124	0	488	233	0.1731	-2.53032	0.00102786	18518	1	12	0.3	3
CG1849	thiG	782	783	248	372	1968	2377	0.1429	-2.80692	1e-08	291316	5	45	0.3	2.9
CG185	cspA	203	204	0	0	1001	151	0.0009	-10.1178	0.00039506	19686	0	11	0	2.7
CG1850	thiF	1076	1077	371	619	1988	2787	0.2075	-2.26882	1e-08	557963	6	47	0.3	2.2
CG1851	tex	2276	2277	620	496	4839	3207	0.1388	-2.84892	0	2496915	9	94	0.2	2.1
CG1852	cgp2242	977	978	0	124	1706	2792	0.0278	-5.16877	0	454294	1	51	0.1	2.6
CG1853	cgp2243	1331	1332	124	372	3253	4159	0.067	-3.8997	0	839216	4	76	0.2	2.9
CG1854	cgp2244	1253	1254	124	620	3490	3379	0.1084	-3.20556	0	743082	6	75	0.2	3
CG1855	cgp2247	371	372	0	0	541	472	0.001	-9.96578	4.633e-05	66402	0	15	0	2
CG1856	cgp2248	692	693	124	0	625	1186	0.069	-3.85726	6.1e-07	231470	1	26	0.1	1.9
CG1857	trmD	869	866	0	0	27	6	0.0294	-5.08804	0.0226878	373246	0	4	0	0.2
CG1858	cgp2250	650	651	248	0	2396	2060	0.0559	-4.16101	2.8e-07	202798	2	30	0.2	2.3
CG1859	rimM	515	512	0	0	0	39	0.025	-5.32193	0.078751	130560	0	2	0	0.2
CG186	cgp0216	536	537	124	0	1081	449	0.0816	-3.61529	4.263e-05	139624	1	18	0.1	1.7
CG1860	cgp2252	350	351	124	124	450	735	0.2099	-2.25223	1.789e-05	58104.5	2	22	0.3	3.1
CG1861	rpsP	497	498	0	0	0	231	0.0043	-7.86145	0.0226418	123006	0	4	0	0.4
CG1862	cgp2254	476	477	247	124	2506	1967	0.0831	-3.58901	0	104250	2	43	0.2	4.5
CG1863	cgp2255	869	866	0	0	491	952	0.0007	-10.4804	3.45e-06	366318	0	20	0	1.2
CG1864	cgp2256	878	879	248	0	2319	1930	0.0586	-4.09296	0	367880	2	45	0.1	2.6
CG1865	srp	1643	1644	0	0	58	16	0.0133	-6.23243	0.012638	1347258	0	5	0	0.2
CG1866	glnD	2078	2079	2597	496	9459	7396	0.1836	-2.44536	0	2.05334e+06	13	118	0.3	2.8
CG1867	glnK	338	339	124	0	1628	1812	0.0363	-4.78389	9e-08	52720	1	32	0.1	4.7
CG1868	amtB	1316	1317	0	495	3025	3549	0.0754	-3.72929	0	827781	3	64	0.1	2.4
CG1869	cgp2262	1730	1731	0	0	2	1	0.25	-2	0.0416174	1495584	0	3	0	0.1
CG187	cgp0217	308	305	0	124	633	480	0.1122	-3.15586	0.00181195	44989	1	11	0.2	1.8
CG1870	cgp2263	3374	3375	248	744	5018	5149	0.0977	-3.3555	0	5417335	8	176	0.1	2.6
CG1871	cgp2265	3467	3468	372	744	4221	6719	0.1021	-3.29195	0	5.77459e+06	9	151	0.1	2.2
CG1872	cgp2266	284	285	0	0	984	553	0.0007	-10.4804	4.76e-06	37905	0	19	0	3.3
CG1873	cgp2267	1838	1839	371	248	3415	4679	0.0766	-3.70651	0	1598224	4	105	0.1	2.9
CG1874	cgp2268	860	861	124	618	2227	1715	0.1884	-2.40813	0	351326	2	47	0.1	2.7
CG1875	cgp2269	809	810	371	247	1663	2812	0.1383	-2.85413	0	312300	3	42	0.2	2.6
CG1876	cgp2270	449	450	0	0	806	1567	0.0004	-11.2877	3.1e-06	96750	0	20	0	2.2
CG1877	cgp2271	617	618	0	0	989	1319	0.0004	-11.2877	6.5e-07	183855	0	24	0	1.9
CG1878	mutM1	833	834	248	248	1146	1951	0.1604	-2.64025	0	328261	4	52	0.2	3.1
CG1879	rnc	743	740	0	0	303	444	0.0013	-9.58727	5.79e-06	266770	0	19	0	1.3
CG188	cgp0218	416	417	0	0	242	288	0.0019	-9.03978	0.00073978	84859.5	0	10	0	1.2
CG1880	cgp2274	536	537	0	0	323	269	0.0017	-9.20025	8.363e-05	140426	0	14	0	1.3
CG1881	cgp2275	791	792	0	247	1387	832	0.1117	-3.1623	5.3e-06	305325	1	22	0.1	1.4
CG1882	cgp2277	1625	1626	619	372	4098	3633	0.1283	-2.96241	0	1261130	7	82	0.2	2.5
CG1883	cgp2279	1532	1529	372	868	6596	6172	0.0972	-3.3629	0	1.08814e+06	10	119	0.3	3.9
CG1884	gdh	1343	1344	124	495	463	3085	0.1747	-2.51705	0	873665	4	49	0.1	1.8
CG1885	glxK	1124	1121	124	124	2052	2163	0.0591	-4.0807	0	599200	2	56	0.1	2.5
CG1886	cgp2283	398	399	0	0	315	721	0.001	-9.96578	1.562e-05	76209	0	17	0	2.1
CG1887	galT	1328	1329	124	0	3468	3629	0.0176	-5.82828	0	841270	1	64	0	2.4
CG1888	cgp2285	1265	1266	0	124	2928	1930	0.0257	-5.28209	0	762151	1	65	0	2.6
CG1889	cgp2286	338	335	0	0	436	714	0.0009	-10.1178	4.99e-06	52930	0	19	0	2.8
CG189	cgp0219	137	138	0	0	416	380	0.0013	-9.58727	0.00210402	8970	0	8	0	2.9
CG1890	cgp2287	116	117	0	0	349	27	0.0027	-8.53282	0.00671008	6493.5	0	6	0	2.6
CG1891	cgp2288	278	279	0	0	361	496	0.0012	-9.70275	0.00071919	37525.5	0	10	0	1.8
CG1892	glgP2	2552	2553	990	372	8455	7832	0.0837	-3.57863	0	3063970	8	164	0.2	3.2
CG1893	cgp2290	902	903	0	0	3122	2723	0.0002	-12.2877	0	381066	0	60	0	3.3
CG1894	pyk	1427	1428	0	0	480	804	0.0008	-10.2877	0	993888	0	36	0	1.3
CG1895	lgt	950	951	0	0	311	224	0.0019	-9.03978	0.00044202	446970	0	11	0	0.6
CG1896	cgp2293	785	786	124	124	1403	1118	0.0987	-3.34081	4e-08	296346	2	34	0.1	2.2
CG1897	cgp2294	659	660	0	0	0	37	0.0263	-5.24879	0.0787283	217140	0	2	0	0.2
CG1898	cgp2296	356	357	0	0	886	1983	0.0003	-11.7027	2.93e-06	60154.5	0	20	0	2.8
CG1899	hisF	776	773	0	0	1204	1207	0.0004	-11.2877	3e-08	287556	0	29	0	1.9
CG19	cgp0021	422	423	0	124	857	410	0.0986	-3.34227	4.125e-05	85873	1	18	0.1	2.1
CG190	cgp0220	428	429	0	0	46	421	0.0021	-8.89539	0.00042596	89661	0	11	0	1.3
CG1900	impA	827	828	0	124	1957	1774	0.0335	-4.8997	0	325412	1	43	0.1	2.6
CG1901	hisA	740	741	248	371	1100	2049	0.1968	-2.3452	1e-08	260518	4	43	0.3	2.9
CG1902	hisH	635	636	124	990	4945	6783	0.0951	-3.39441	1e-08	189894	5	45	0.4	3.5
CG1903	cgp2301	1316	1317	495	248	3158	2542	0.1305	-2.93788	0	830455	5	62	0.2	2.4
CG1904	cgp2302	227	228	0	0	1	303	0.0033	-8.24332	0.00388852	25194	0	7	0	1.5
CG1905	hisB	608	609	124	372	3200	3780	0.0712	-3.81198	0	173571	4	46	0.3	3.8
CG1906	hisC	1100	1101	124	743	2442	4951	0.1174	-3.0905	0	570978	6	73	0.3	3.3
CG1907	hisD	1328	1329	248	372	4596	4723	0.0666	-3.90833	0	833340	5	83	0.2	3.1
CG1908	cgp2306	1202	1203	248	0	1982	1857	0.0648	-3.94786	0	690557	2	59	0.1	2.5
CG1909	cgp2307	653	654	0	0	4046	1658	0.0002	-12.2877	0	201432	0	38	0	2.9
CG191	cgp0221	992	993	372	248	1578	2012	0.1729	-2.53199	0	470268	5	53	0.3	2.7
CG1910	cgp2308	644	645	0	0	1024	713	0.0006	-10.7027	6.6e-07	200595	0	23	0	1.8
CG1911	cgp2309	563	564	124	0	1170	1008	0.0574	-4.12281	1e-08	150034	1	34	0.1	3
CG1912	glgX	2510	2511	620	248	5816	4993	0.0804	-3.63666	0	2992140	7	137	0.1	2.7
CG1913	cgp2311	803	804	0	248	1896	2657	0.0547	-4.19232	0	303936	2	53	0.1	3.3
CG1914	gip	776	777	372	124	1466	1937	0.146	-2.77596	0	285209	4	49	0.3	3.2
CG1915	idhA3	1013	1014	371	248	2892	3633	0.095	-3.39593	0	476171	4	81	0.2	4
CG1916	cgp2314	998	999	124	124	2917	1919	0.0515	-4.27928	0	476042	2	49	0.1	2.5
CG1917	cgp2315	731	732	0	124	1586	1790	0.037	-4.75633	1.04e-06	259130	1	25	0.1	1.7
CG1918	cgp2317	1040	1041	124	0	1768	2335	0.0305	-5.03505	0	516349	1	50	0	2.4
CG1919	cgp2318	989	990	248	124	1891	3914	0.0642	-3.96128	0	463360	3	62	0.2	3.1
CG192	cgp0222	404	405	0	0	178	150	0.003	-8.38082	0.00702346	80797.5	0	6	0	0.7
CG1920	cgp2320	395	396	124	495	1956	616	0.241	-2.05289	8.5e-06	73684	4	29	0.5	3.7
CG1921	cgp2321	1430	1431	248	0	2903	3014	0.0421	-4.57004	0	968830	2	81	0.1	2.8
CG1922	cgp2322	608	609	0	124	2449	2434	0.0256	-5.28771	0	171138	1	50	0.1	4.1
CG1923	treY	2435	2436	248	372	5300	4382	0.0641	-3.96353	0	2836857	5	113	0.1	2.3
CG1924	cgp2324	1025	1026	372	0	3141	2937	0.0614	-4.02562	0	493556	3	69	0.1	3.4
CG1925	cgp2325	131	132	0	124	646	102	0.1669	-2.58294	0.00302606	8122	1	10	0.4	3.8
CG1926	cgp2326	374	375	0	124	1001	805	0.0692	-3.85308	1.53e-06	66006.5	1	24	0.1	3.2
CG1927	cgp2328	1040	1041	124	124	2349	4003	0.0392	-4.673	0	511676	2	60	0.1	2.9
CG1928	cgp2329	1046	1047	618	619	4881	5856	0.1153	-3.11654	0	516827	7	69	0.3	3.3
CG1929	cgp2330	380	381	0	0	806	1635	0.0004	-11.2877	6e-08	67437	0	27	0	3.5
CG193	cgp0223	1475	1476	0	371	1884	2379	0.0872	-3.51953	0	1048742	2	57	0.1	1.9
CG1930	cgp2331	233	234	0	0	712	627	0.0007	-10.4804	0.00040245	26091	0	12	0	2.6
CG1931	cgp2332	653	654	124	124	1439	1218	0.0937	-3.41581	8.2e-07	205366	2	28	0.2	2.1
CG1932	treZ	1724	1725	371	0	5419	3528	0.0416	-4.58727	0	1402496	2	103	0.1	3
CG1933	ilvA	1310	1311	496	495	4299	4854	0.1084	-3.20556	0	804456	7	93	0.3	3.5
CG1934	cgp2336	503	504	247	0	1259	1068	0.1065	-3.23107	5.7e-07	120718	1	26	0.1	2.6
CG1935	cgp2337	1205	1206	496	372	3844	5720	0.0909	-3.45958	0	670098	7	103	0.3	4.3
CG1936	dnaE1	3566	3567	0	0	2	2	0.2	-2.32193	0.022735	6.35461e+06	0	4	0	0.1
CG1937	cgp2339	842	843	0	0	1153	1022	0.0005	-10.9658	1e-08	341836	0	33	0	2
CG1938	cgp2340	470	471	0	0	762	244	0.001	-9.96578	3.13e-06	106210	0	20	0	2.1
CG1939	cgp2341	986	983	248	124	1930	2457	0.085	-3.55639	0	461066	3	48	0.2	2.4
CG194	tnp2f	1514	1515	0	0	0	0	1	0		1.14761e+06	0	0	0	0
CG1940	cgp2342	887	888	248	248	1633	1798	0.1448	-2.78787	0	373912	4	52	0.2	2.9
CG1941	cgp2343	2654	2624	867	248	5349	7529	0.0867	-3.52782	0	3293342	8	124	0.2	2.4
CG1942	cgp2344	953	954	124	372	2118	2484	0.108	-3.2109	0	433166	4	51	0.2	2.7
CG1943	cgp2345	581	582	124	0	2016	1498	0.0356	-4.81198	1e-08	159765	1	35	0.1	3
CG1944	rluD	932	931	0	0	677	346	0.001	-9.96578	3.48e-06	424070	0	20	0	1.1
CG1945	IspA	572	573	0	0	107	301	0.0024	-8.70275	0.00130658	161586	0	10	0	0.9
CG1946	cgp2348	1004	1005	124	0	2776	3214	0.0209	-5.58035	0	469859	1	71	0	3.5
CG1947	cgp2349	1652	1653	372	372	3523	3061	0.1131	-3.14433	0	1314219	6	69	0.2	2.1
CG1948	cgp2350	602	603	0	124	857	1760	0.0477	-4.38987	1e-08	172165	1	35	0.1	2.9
CG1949	ansA	977	978	248	248	1717	1258	0.167	-2.58208	0	459217	4	45	0.2	2.3
CG195	cgp0228	437	438	0	0	219	873	0.0009	-10.1178	0.00014184	93075	0	14	0	1.6
CG1950	cgp2353	317	236	0	0	704	307	0.001	-9.96578	4.246e-05	26078	0	15	0	3.2
CG1951	tnp2e	1514	1515	0	0	0	0	1	0		1.14761e+06	0	0	0	0
CG1952	dinP	1403	1404	124	0	3784	2210	0.0209	-5.58035	0	939995	1	67	0	2.4
CG1953	cgp2356	860	861	124	124	1846	1957	0.0655	-3.93236	0	350028	2	50	0.1	2.9
CG1954	cgp2357	1004	998	372	494	1227	1258	0.3488	-1.51953	4.9e-07	483079	4	34	0.2	1.7
CG1955	cgp2358	629	630	248	124	1386	1862	0.1148	-3.12281	6e-07	189650	3	32	0.2	2.5
CG1956	ileS	3164	3165	0	0	1	0	0.5	-1	0.158732	5007030	0	1	0	0
CG1957	cgp2360	218	219	0	0	647	303	0.0011	-9.82828	0.00012896	22557	0	13	0	3
CG1958	cgp2361	1097	1098	0	124	230	224	0.2747	-1.86407	0.0168595	599510	1	7	0	0.3
CG1959	cgp2362	287	288	0	0	56	121	0.0056	-7.48036	0.00392703	40464	0	7	0	1.2
CG196	gltB	4532	4532	1115	1239	16614	15882	0.0725	-3.78588	0	9676822	17	288	0.2	3.2
CG1960	cgp2363	458	459	0	124	30	399	0.2907	-1.7824	0.0898562	104653	1	4	0.1	0.4
CG1961	cgp2364	704	705	124	124	1930	2323	0.0585	-4.09542	0	234428	2	43	0.1	3
CG1962	cgp2365	740	741	124	124	1844	2109	0.063	-3.9885	0	259748	2	42	0.1	2.8
CG1963	ftsZ	1328	1329	0	0	3	0	0.25	-2	0.158837	882456	0	1	0	0
CG1964	ftsQ	668	669	0	0	30	0	0.0323	-4.95232	0.0787272	223112	0	2	0	0.1
CG1965	cgp2368	1460	1461	0	0	0	1	0.5	-1	0.158821	1066530	0	1	0	0
CG1966	murG	1091	1092	0	0	0	0	1	0		596232	0	0	0	0
CG1967	ftsW	1652	1653	124	0	1142	373	0.0825	-3.59946	4.625e-05	1352158	1	18	0	0.5
CG1968	murD	1418	1419	0	0	0	0	1	0		1.00678e+06	0	0	0	0
CG1969	mraY	1100	1101	0	124	215	163	0.3298	-1.60034	0.0511182	603899	1	5	0	0.2
CG197	gltD	1520	1521	248	372	3887	3093	0.089	-3.49005	0	1098257	5	83	0.2	2.7
CG1970	murF	1544	1545	0	124	108	172	0.4448	-1.16877	0.00978704	1188109	1	8	0	0.3
CG1971	murE	1565	1566	0	0	0	3	0.25	-2	0.0786827	1224612	0	2	0	0.1
CG1972	ftsI	2114	2111	0	0	177	0	0.0056	-7.48036	0.0786742	2.22605e+06	0	2	0	0
CG1973	cgp2376	797	798	0	0	622	66	0.0015	-9.38082	0.00076005	314412	0	10	0	0.6
CG1974	mraW	1013	1010	0	124	791	1529	0.0539	-4.21357	0	491884	1	37	0	1.8
CG1975	mraZ	431	432	124	248	1229	828	0.1812	-2.46435	0.00017301	89652	3	20	0.3	2.3
CG1976	cgp2380	389	390	0	248	111	695	0.3086	-1.69619	0.00216416	73914	2	13	0.3	1.7
CG1977	cgp2381	425	426	0	0	2611	2093	0.0002	-12.2877	0	82431	0	39	0	4.6
CG1978	cgp2382	563	564	248	124	2118	1140	0.1145	-3.12658	0	148083	3	42	0.3	3.7
CG1979	metF	980	981	371	248	845	1159	0.3092	-1.69339	1.36e-06	467496	4	34	0.2	1.7
CG198	cgp0231	242	243	0	0	331	285	0.0016	-9.28771	0.00040431	28188	0	11	0	2.3
CG1980	idsA	1100	1101	0	0	1090	1023	0.0005	-10.9658	0	585182	0	39	0	1.8
CG1981	cgp2385	1529	1530	866	124	3141	3688	0.1451	-2.78488	0	1.10025e+06	5	98	0.2	3.2
CG1982	cgp2386	371	372	0	124	1038	537	0.0793	-3.65654	4.08e-05	66036	1	18	0.1	2.4
CG1983	pknL	2222	2222	620	248	5954	6865	0.0678	-3.88257	0	2332213	7	132	0.2	3
CG1984	cgp2389	1238	1239	247	0	2278	2667	0.0501	-4.31905	0	724228	1	72	0	2.9
CG1985	cgp2390	1310	1311	372	0	2705	2648	0.0697	-3.8427	0	814845	3	72	0.1	2.7
CG1986	aroG	1388	1389	0	0	375	54	0.0023	-8.76415	0.00025949	956326	0	12	0	0.4
CG1987	cgp2392	506	507	0	0	0	20	0.0476	-4.39289	0.159133	128271	0	1	0	0.1
CG1988	cgp2393	2438	2439	372	496	6769	6535	0.0653	-3.93677	0	2784388	7	164	0.1	3.4
CG1989	cmt4	1451	1452	496	124	2622	3118	0.1082	-3.20823	0	1.00635e+06	5	71	0.2	2.4
CG199	cgp0232	158	159	0	0	435	366	0.0012	-9.70275	0.0123076	12243	0	7	0	2.2
CG1990	cgp2395	179	180	0	0	237	539	0.0013	-9.58727	0.00038749	15210	0	11	0	3.1
CG1991	cgp2397	1190	1191	124	124	1939	1651	0.0693	-3.851	2.57e-06	694954	2	26	0.1	1.1
CG1992	plsC	737	738	0	0	1	130	0.0076	-7.03978	0.0415974	271215	0	3	0	0.2
CG1993	glk	971	972	124	0	50	271	0.3882	-1.36513	0.0898562	470935	1	4	0.1	0.2
CG1994	cgp2400	1145	1146	0	0	0	16	0.0588	-4.08804	0.022703	654366	0	4	0	0.2
CG1995	cgp2401	1019	1020	372	0	2231	1420	0.1021	-3.29195	0	498306	3	46	0.1	2.3
CG1996	cgp2402	629	630	0	124	93	1968	0.0606	-4.04454	1e-08	188378	1	34	0.1	2.7
CG1997	qcrB	1619	1620	0	0	84	138	0.0045	-7.79586	0.00712044	1307340	0	6	0	0.2
CG1998	qcrA1	1226	1219	0	0	1	1	0.3333	-1.58511	0.0786922	741762	0	2	0	0.1
CG1999	qcrC	887	888	0	0	0	0	1	0		394272	0	0	0	0
CG2	cgp0002	305	306	124	124	187	251	0.5672	-0.818071	0.0789914	46210	2	6	0.3	1
CG20	cgp0025	872	873	124	0	2898	2371	0.0237	-5.39897	0	357072	1	57	0.1	3.3
CG200	cgp0233	1487	1469	866	372	4159	3211	0.1681	-2.57261	0	1.02919e+06	8	77	0.3	2.6
CG2000	ctaE	617	618	0	0	0	0	1	0		190962	0	0	0	0
CG2001	cgp2408	431	432	0	0	0	1	0.5	-1	0.159216	93096	0	1	0	0.1
CG2002	ctaC	1079	1080	0	0	0	106	0.0093	-6.74855	0.158879	582660	0	1	0	0
CG2003	ltsA	1922	1923	124	0	1588	1484	0.0407	-4.61883	0	1814361	1	38	0	1
CG2004	cgp2411	344	345	0	0	0	196	0.0051	-7.61529	0.0125044	58650	0	5	0	0.7
CG2005	cgp2412	719	720	124	124	1970	1905	0.0642	-3.96128	0	243384	2	47	0.1	3.3
CG2006	cobU	524	525	124	124	1498	1461	0.0841	-3.57175	2.23e-06	131520	2	27	0.2	2.6
CG2007	cobT	1076	1077	0	248	1639	2087	0.0668	-3.90401	0	556294	2	46	0.1	2.1
CG2008	cobS	923	924	0	124	1574	1633	0.039	-4.68038	0	408883	1	40	0.1	2.2
CG2009	cgp2416	251	252	0	124	255	614	0.1437	-2.79887	0.0018112	30495.5	1	11	0.2	2.2
CG201	emb	3473	3474	0	0	431	751	0.0008	-10.2877	5.292e-05	6008283	0	16	0	0.2
CG2010	cgp2417	716	717	248	124	2818	3274	0.0612	-4.03032	0	241656	3	46	0.2	3.2
CG2011	ilvE	1103	1104	0	248	2546	1506	0.0614	-4.02562	0	586246	2	45	0.1	2
CG2012	pepB	1541	1542	496	247	4517	4459	0.0829	-3.59248	0	1.12117e+06	5	93	0.2	3
CG2013	cgp2420	395	396	0	0	1124	699	0.0005	-10.9658	5.8e-07	73854	0	23	0	2.9
CG2014	sucB	2027	2028	0	0	11	47	0.0169	-5.88683	0.0786752	2054364	0	2	0	0
CG2015	lipB	755	756	0	0	11	2	0.0714	-3.80793	0.0787183	285012	0	2	0	0.1
CG2016	lipA	1046	1047	0	0	351	68	0.0024	-8.70275	0.0040343	544440	0	7	0	0.3
CG2017	cgp2424	782	783	0	0	33	1	0.0286	-5.12784	0.0226812	304978	0	4	0	0.3
CG2018	cgp2425	1619	1620	372	248	5038	5117	0.0611	-4.03268	0	1.2297e+06	5	107	0.2	3.3
CG2019	tnp2d	1514	1515	0	0	0	0	1	0		1.14761e+06	0	0	0	0
CG202	cgp0236	2033	2026	371	0	56	0	6.5263	2.70627	0.158805	2.05031e+06	1	3	0	0.1
CG2020	cgp2428	473	474	0	0	116	97	0.0047	-7.73312	0.00398486	110679	0	7	0	0.7
CG2021	glnA	1433	1434	0	124	0	0	125	6.96578	0.158824	1028895	1	0	0	0
CG2022	cgp2430	167	168	0	0	57	426	0.0021	-8.89539	0.00382312	13524	0	7	0	2.1
CG2023	cgp2431	401	398	248	124	897	662	0.2391	-2.06431	0.00028921	76031.5	3	19	0.4	2.4
CG2024	cgp2432	536	537	0	124	1302	1353	0.0471	-4.40813	3.3e-07	137210	1	27	0.1	2.5
CG2025	cgp2434	908	909	248	372	1529	2910	0.1399	-2.83753	0	394104	5	48	0.3	2.6
CG2026	cgp2435	347	348	0	0	190	0	0.0052	-7.58727	0.0225951	59856	0	4	0	0.6
CG2027	cgp2436	92	93	0	0	196	249	0.0022	-8.82828	0.0120506	4092	0	5	0	2.7
CG2028	thrC	1445	1446	248	248	2365	3288	0.0879	-3.50799	0	999983	4	67	0.1	2.3
CG2029	cgp2438	218	219	124	124	1046	920	0.1266	-2.98165	0.00013462	22234.5	2	18	0.5	4.1
CG203	cgp0237	761	762	248	124	283	380	0.5617	-0.832128	0.00051766	284631	3	19	0.2	1.2
CG2030	cgp2440	1325	1326	620	372	5654	2888	0.1162	-3.10532	0	817032	8	102	0.3	3.8
CG2031	cgp2441	494	401	124	0	431	477	0.1375	-2.8625	0.00107908	78199	1	12	0.1	1.5
CG2032	cgp2442	446	447	248	0	750	397	0.2169	-2.2049	0.00015579	96338.5	2	18	0.2	2
CG2033	cgp2443	407	408	0	0	629	241	0.0011	-9.82828	0.00024434	80784	0	13	0	1.6
CG2034	cgp2444	482	483	0	0	1250	1333	0.0004	-11.2877	2e-08	109641	0	30	0	3.1
CG2035	hmuO	647	648	247	0	1649	2215	0.0642	-3.96128	0	198948	1	37	0.1	2.9
CG2036	glnE	3137	3138	248	744	4880	5520	0.0955	-3.38836	0	4721477	8	139	0.1	2.2
CG2037	glnA2	1340	1341	371	0	2781	1395	0.0891	-3.48843	0	856949	2	65	0.1	2.4
CG2038	cgp2449	1106	1107	620	0	3840	3838	0.0809	-3.62772	0	580694	5	63	0.2	2.8
CG2039	cgp2450	1817	1818	248	248	5434	4934	0.0479	-4.38383	0	1553587	4	114	0.1	3.1
CG204	cgp0238	1466	1467	0	0	58	1	0.0167	-5.90401	0.078685	1.07458e+06	0	2	0	0.1
CG2040	cgp2451	182	183	0	0	109	0	0.0091	-6.77992	0.0414915	16470	0	3	0	0.8
CG2041	galK	1295	1296	496	0	3145	2884	0.0824	-3.60121	0	797100	4	70	0.2	2.7
CG2042	cgp2453	1409	1410	248	124	3656	3901	0.0494	-4.33935	0	941930	3	77	0.1	2.7
CG2043	cgp4102	395	396	0	0	1	28	0.0333	-4.90833	0.0787808	78012	0	2	0	0.3
CG2044	cgp2455	1148	1149	0	124	2345	3781	0.0204	-5.61529	0	626793	1	59	0	2.6
CG2045	cgp2456	719	720	372	372	2236	1343	0.2081	-2.26465	7e-08	246300	6	43	0.4	3
CG2046	cgp2457	1142	1143	372	248	5197	4144	0.0665	-3.9105	0	608161	5	88	0.2	3.8
CG2047	pgp2	656	657	124	248	3331	2297	0.0663	-3.91485	0	199431	3	56	0.2	4.3
CG2048	ptpA	500	487	124	0	887	1978	0.0436	-4.51953	6e-08	111530	1	31	0.1	3.2
CG2049	cgp2460	1001	1002	0	0	985	960	0.0005	-10.9658	2.975e-05	493986	0	16	0	0.8
CG205	cgp0239	227	228	0	0	82	126	0.0048	-7.70275	0.0124179	25422	0	5	0	1.1
CG2050	tnp4a	395	396	248	0	701	1486	0.1138	-3.13543	2.11e-06	73670	2	26	0.3	3.3
CG2051	cgp2462	593	594	124	0	2222	1584	0.0328	-4.93016	4e-08	167516	1	31	0.1	2.6
CG2052	cgpt5041	75	76	0	0	0	0	1	0		2888	0	0	0	0
CG2053	cgp2464	431	432	0	0	487	336	0.0012	-9.70275	3.07e-06	88992	0	20	0	2.3
CG2054	aceE	2768	2769	0	0	4	0	0.2	-2.32193	0.0227306	3.82814e+06	0	4	0	0.1
CG2055	cgp2467	791	792	0	124	1255	2265	0.0355	-4.81604	0	297406	1	42	0.1	2.7
CG2056	cgp2468	890	887	0	248	1819	2286	0.0606	-4.04454	0	374333	2	45	0.1	2.5
CG2057	cgp2470	992	993	0	372	4009	3964	0.0468	-4.41735	0	455337	3	81	0.2	4.1
CG2058	cgp2471	800	801	124	124	2741	2721	0.0456	-4.45482	0	298398	2	58	0.1	3.6
CG2059	cgp2472	1016	1017	372	0	3396	1247	0.0803	-3.63846	0	493284	3	52	0.1	2.6
CG206	cgp0240	491	488	248	247	1006	1418	0.2045	-2.28983	2e-07	111786	3	33	0.3	3.4
CG2060	acpM	293	294	0	0	920	430	0.0007	-10.4804	0.00126639	41895	0	9	0	1.5
CG2061	cgp2474	827	828	248	124	1197	1791	0.1248	-3.00231	3.8e-07	330807	3	34	0.2	2.1
CG2062	cgp2475	1034	1035	124	0	2220	4465	0.0187	-5.74082	0	506126	1	58	0	2.8
CG2063	cgp2477	428	429	0	248	1613	1984	0.0692	-3.85308	5e-08	85378	2	33	0.2	3.8
CG2064	cgp2478	809	810	371	0	2481	3506	0.0621	-4.00926	0	301354	1	70	0.1	4.3
CG2065	cgp2479	458	459	372	124	1010	1204	0.2244	-2.15586	1.88e-06	99178	4	31	0.4	3.4
CG2066	cgp2480	563	564	866	0	1631	1730	0.2579	-1.95512	2.9e-07	150080	5	37	0.4	3.3
CG2067	cgp2481	242	243	0	0	905	115	0.001	-9.96578	0.00220343	28552.5	0	8	0	1.6
CG2068	cgp2482	545	546	247	124	1049	1202	0.1652	-2.59771	3.96e-06	142796	2	25	0.2	2.3
CG2069	cgp2483	428	425	124	248	484	1177	0.2244	-2.15586	0.00587012	88189	3	13	0.4	1.5
CG207	cgp0241	455	456	248	124	2091	2158	0.0878	-3.50964	0	94861.5	3	45	0.3	4.9
CG2070	cgp2484	344	345	124	124	1473	1443	0.0854	-3.54962	1.745e-05	56072.5	2	22	0.3	3.2
CG2071	cgpt5042	76	77	0	0	0	0	1	0		2964.5	0	0	0	0
CG2072	phoD	1550	1551	371	124	3623	4993	0.0576	-4.11779	0	1139271	3	89	0.1	2.9
CG2073	cgpt5043	75	76	0	0	0	0	1	0		2888	0	0	0	0
CG2074	cgpt5044	75	76	124	0	160	0	0.7764	-0.365128	0.159459	2812.5	1	3	0.7	2
CG2075	cgp2487	1838	1839	867	248	4488	5767	0.1088	-3.20025	0	1.58275e+06	8	127	0.2	3.5
CG2076	cgp2488	242	243	0	0	791	402	0.0008	-10.2877	0.00013143	27945	0	13	0	2.7
CG2077	dnaG	1901	1902	0	124	0	272	0.4579	-1.1269	0.158687	1.8069e+06	1	3	0	0.1
CG2078	cgp2490	494	495	0	124	1373	1325	0.0463	-4.43284	3.2e-07	116083	1	30	0.1	3
CG2079	cgp2491	245	246	124	0	1004	499	0.0831	-3.58901	2.28e-06	27559.5	1	26	0.2	5.3
CG208	cgp0242	896	897	0	0	1687	1660	0.0003	-11.7027	0	378534	0	55	0	3.1
CG2080	glmS	1871	1872	0	0	1	0	0.5	-1	0.158785	1751256	0	1	0	0
CG2081	dgt	1274	1275	248	495	3357	3355	0.1108	-3.17397	0	772101	5	69	0.2	2.7
CG2082	cgp2495	677	678	124	248	1438	2444	0.0961	-3.37932	0	214966	3	47	0.2	3.5
CG2083	cgp2496	2054	2055	372	124	4683	4091	0.0566	-4.14305	0	2009880	4	103	0.1	2.5
CG2084	cgp2497	488	489	0	0	1412	841	0.0004	-11.2877	5.44e-06	114915	0	20	0	2
CG2085	cgp2498	584	585	0	0	317	175	0.002	-8.96578	3.27e-06	165262	0	20	0	1.7
CG2086	glyS	1385	1386	0	0	0	0	1	0		960498	0	0	0	0
CG2087	cgp2500	371	372	124	248	1509	1351	0.1304	-2.93898	2.094e-05	65301	3	24	0.4	3.2
CG2088	fur	434	435	124	124	831	623	0.1711	-2.54709	3.84e-06	89631	2	27	0.2	3.1
CG2089	cgp2504	1553	1554	0	618	1079	1055	0.2899	-1.78637	3.565e-05	1192709	2	21	0.1	0.7
CG209	cgp0243	434	435	0	124	1289	1015	0.0542	-4.20556	6e-08	88314	1	31	0.1	3.6
CG2090	cgp2505	107	108	0	0	230	118	0.0029	-8.42973	0.0121363	5562	0	5	0	2.3
CG2091	cgp2507	1073	1074	124	124	2742	1867	0.054	-4.2109	0	542942	2	67	0.1	3.1
CG2092	uppS2	731	731	0	124	1	6	15.625	3.96578	0.282519	266816	1	2	0.1	0.1
CG2093	recO	728	729	0	0	446	226	0.0015	-9.38082	2.906e-05	259888	0	17	0	1.2
CG2094	bex	917	918	0	0	1	3	0.2	-2.32193	0.0416042	419985	0	3	0	0.2
CG2095	cgp2511	1322	1323	248	124	2927	4714	0.0488	-4.35698	0	822966	3	82	0.1	3.1
CG2096	cgp2512	590	591	0	0	1	105	0.0093	-6.74855	0.0787375	174050	0	2	0	0.2
CG2097	phoH2	1019	1016	372	0	1752	1216	0.1256	-2.99309	0	495333	3	45	0.1	2.2
CG2098	cgp2514	725	725	124	0	2080	2305	0.0285	-5.13289	0	246873	1	46	0.1	3.2
CG2099	cgp2515	1148	1149	124	124	1334	3480	0.0517	-4.27369	0	625668	2	62	0.1	2.7
CG21	cgp0026	746	747	247	0	1361	1305	0.093	-3.42663	7e-08	268186	1	30	0.1	2
CG210	cgp0244	404	405	124	5810	1292	1689	1.9903	0.992986	7.73e-06	77380	3	27	0.4	3.3
CG2100	hrcA	1028	1029	248	124	2712	3527	0.0598	-4.06371	0	496536	3	67	0.1	3.3
CG2101	cgp2517	1142	1143	124	124	3020	2060	0.049	-4.35107	0	617828	2	66	0.1	2.9
CG2102	cgp2518	512	513	0	124	1748	715	0.0507	-4.30187	9.7e-07	125435	1	25	0.1	2.4
CG2103	cgp2519	680	681	0	0	465	221	0.0015	-9.38082	9.82e-06	225752	0	18	0	1.3
CG2104	cgp2520	380	377	495	124	1412	1180	0.2391	-2.06431	6.2e-07	65636	4	36	0.5	4.8
CG2105	fadD15	1847	1848	372	1362	6331	11153	0.0992	-3.33352	0	1574869	12	159	0.3	4.3
CG2106	malQ	2120	2121	991	620	11887	8305	0.0798	-3.64747	0	2111766	11	148	0.3	3.5
CG2107	cgp2524	1865	1866	372	248	2626	2992	0.1105	-3.17788	0	1671128	5	80	0.1	2.1
CG2108	cgp2525	140	141	0	0	1	0	0.5	-1	0.160377	9870	0	1	0	0.4
CG2109	cgp2526	206	199	0	0	657	856	0.0007	-10.4804	2.297e-05	18208.5	0	16	0	4
CG211	cgp0245	635	636	0	0	958	1185	0.0005	-10.9658	5.68e-06	196206	0	19	0	1.5
CG2110	dcp	2036	2037	372	496	5670	5866	0.0753	-3.73121	0	1967889	7	113	0.2	2.8
CG2111	cgp2528	1181	1182	372	124	2901	1845	0.1047	-3.25567	0	670839	4	51	0.2	2.2
CG2112	treS	1814	1815	372	496	4837	7275	0.0717	-3.80188	0	1543794	7	123	0.2	3.4
CG2113	treX	1091	1088	495	124	1806	2109	0.1583	-2.65927	0	559855	4	63	0.2	2.9
CG2114	idi	569	570	0	124	787	1401	0.0571	-4.13037	4e-08	153912	1	32	0.1	2.8
CG2115	cgp2533	1757	1758	124	743	2871	4806	0.1131	-3.14433	0	1477776	6	83	0.2	2.4
CG2116	cgp2534	566	563	0	0	1545	1148	0.0004	-11.2877	0	148914	0	34	0	3
CG2117	cgp2535	521	522	0	124	1746	965	0.0461	-4.43909	1.1e-07	128940	1	30	0.1	2.9
CG2118	aecD	1106	1107	0	496	1971	2481	0.1116	-3.16359	0	580138	4	64	0.2	2.9
CG2119	brnQ	1280	1281	372	0	4282	2615	0.0541	-4.20823	0	787212	3	56	0.1	2.2
CG212	cgp0246	932	929	0	0	0	1	0.5	-1	0.158916	431056	0	1	0	0.1
CG2120	cgp2538	980	981	371	248	3677	2275	0.1041	-3.26396	0	449852	3	68	0.2	3.5
CG2121	cgp2539	1847	1848	248	248	3817	3897	0.0644	-3.9568	0	1630962	4	88	0.1	2.4
CG2122	cgp2540	518	519	0	0	1181	692	0.0005	-10.9658	1.2e-07	127934	0	26	0	2.5
CG2123	cgp2542	929	930	0	124	2464	2094	0.0274	-5.18968	0	411530	1	46	0.1	2.5
CG2124	glcD	2846	2847	248	248	3976	3976	0.0625	-4	0	3906218	4	109	0.1	1.9
CG2125	cgp2544	713	714	372	124	203	1143	0.369	-1.43831	0.00012064	248149	4	23	0.3	1.6
CG2126	cgp2545	257	258	0	0	78	851	0.0011	-9.82828	0.00023241	31734	0	12	0	2.3
CG2127	cgp2546	1349	1350	0	371	3151	1919	0.0734	-3.76808	0	872813	2	59	0.1	2.2
CG2128	cgp2549	1511	1508	0	124	672	1227	0.0658	-3.92577	0	1109148	1	39	0	1.3
CG2129	cgp2550	968	969	0	7292	1393	1470	2.5464	1.34846	1e-08	453509	1	36	0.1	1.9
CG213	cgp0247	599	600	124	124	735	2834	0.0697	-3.8427	1.6e-07	171309	2	32	0.2	2.7
CG2130	cgp2551	830	823	0	0	820	344	0.0009	-10.1178	4e-07	328788	0	24	0	1.5
CG2131	cgp2552	1439	1436	248	124	1854	1383	0.1152	-3.11779	0	998786	3	48	0.1	1.7
CG2132	cgp2553	551	552	248	124	2358	2609	0.0751	-3.73504	0	138600	3	55	0.3	5
CG2133	rbsK2	905	906	248	124	3347	1352	0.0794	-3.65472	0	387802	3	54	0.2	3
CG2134	cgp2556	1400	1401	124	124	2339	2514	0.0513	-4.2849	0	940105	2	65	0.1	2.3
CG2135	cgp2557	974	975	372	372	2060	4212	0.1188	-3.07339	0	447140	6	65	0.3	3.3
CG2136	cgp2558	767	768	496	124	3024	2651	0.1094	-3.19232	0	275022	5	57	0.3	3.7
CG2137	aceB	2219	2216	124	124	4616	5180	0.0254	-5.29903	0	2339041	2	108	0	2.4
CG2138	aceA	1298	1299	248	2103	5952	5508	0.2052	-2.2849	0	780935	8	109	0.3	4.2
CG2139	thiX	572	573	124	371	2345	2860	0.0953	-3.39138	0	151028	3	51	0.3	4.5
CG214	cgp0248	791	792	0	0	1	85	0.0115	-6.44222	0.0125998	311652	0	5	0	0.3
CG2140	cgp2562	590	591	248	0	1073	1267	0.1064	-3.23243	1.922e-05	168738	2	22	0.2	1.9
CG2141	lcoP	1892	1893	371	247	3805	3554	0.0841	-3.57175	0	1707586	3	94	0.1	2.5
CG2142	cgp2564	281	282	0	0	0	625	0.0016	-9.28771	0.0225588	39198	0	4	0	0.7
CG2143	cgp2565	998	999	124	124	2186	2165	0.0572	-4.12784	0	474052	2	54	0.1	2.7
CG2144	cgp2566	1595	1596	124	124	4669	4149	0.0282	-5.14816	0	1205811	2	88	0.1	2.8
CG2145	cgp2567	386	387	124	124	666	403	0.2327	-2.10346	0.00075222	72378	2	15	0.3	1.9
CG2146	dctM	1313	1314	248	248	2922	3451	0.078	-3.68038	0	821973	4	69	0.2	2.6
CG2147	dctX	524	521	124	248	880	2222	0.1202	-3.05649	3.689e-05	130518	3	23	0.3	2.2
CG2148	dctP	749	750	248	0	1317	2062	0.0737	-3.76219	0	265520	2	45	0.1	3
CG2149	lepA	1847	1848	248	496	2208	3517	0.1301	-2.94231	0	1622751	6	100	0.2	2.7
CG215	cgp0249	896	897	0	124	0	55	2.2321	1.1584	0.158993	401409	1	3	0.1	0.2
CG2150	cgp2572	611	612	0	124	470	359	0.1506	-2.73121	1.5e-05	181467	1	20	0.1	1.6
CG2151	rpsT	263	264	0	0	1	0	0.5	-1	0.159574	34716	0	1	0	0.2
CG2152	cgp2574	671	672	248	372	1790	2863	0.1334	-2.90617	4e-08	213711	5	44	0.4	3.3
CG2153	cgp2575	401	402	0	0	563	925	0.0007	-10.4804	8.115e-05	77988	0	15	0	1.9
CG2154	cgp2576	977	978	0	0	83	71	0.0065	-7.26534	0.041606	476775	0	3	0	0.2
CG2155	cgp2577	1664	1665	124	743	5868	5372	0.0772	-3.69526	0	1.30718e+06	6	102	0.2	3.1
CG2156	cgp2578	653	650	0	0	846	1113	0.0005	-10.9658	2e-08	201500	0	30	0	2.3
CG2157	cgp2579	824	825	0	0	172	4	0.0056	-7.48036	0.0126027	338250	0	5	0	0.3
CG2158	cgp2581	710	711	0	124	1860	1520	0.037	-4.75633	0	239262	1	40	0.1	2.8
CG2159	cgp2582	473	474	124	247	361	702	0.3496	-1.51622	1.931e-05	107617	2	22	0.2	2.3
CG216	cgp0250	1175	1172	0	124	6467	4601	0.0113	-6.46753	0	639338	1	82	0	3.5
CG2160	cgp2583	122	123	0	0	260	67	0.003	-8.38082	0.00373326	7134	0	7	0	2.8
CG2161	nadD	656	657	0	0	1	10	0.0833	-3.58554	0.0226679	214510	0	4	0	0.3
CG2162	cgp2585	1025	1026	0	248	2367	3314	0.0438	-4.51293	0	503278	2	47	0.1	2.3
CG2163	proA	1298	1299	372	496	5099	7009	0.0718	-3.79987	0	780176	7	109	0.3	4.2
CG2164	cgp2587	914	915	372	124	2620	4141	0.0735	-3.76611	0	389836	4	69	0.2	3.8
CG2165	proB	1229	1230	124	0	2587	2226	0.026	-5.26534	0	717108	1	65	0	2.6
CG2166	cgp2589	1505	1506	0	124	0	195	0.6378	-0.648824	0.5	1.13402e+06	1	1	0	0
CG2167	cgp2590	1934	1935	868	372	5534	6771	0.1008	-3.31043	0	1757290	10	134	0.3	3.5
CG2168	dkgA	917	918	248	495	2309	3547	0.127	-2.9771	0	397562	5	59	0.3	3.2
CG2169	cgp2592	623	624	0	0	155	533	0.0015	-9.38082	2.864e-05	189696	0	16	0	1.3
CG217	cgp0251	980	977	0	248	1942	2788	0.0526	-4.24879	0	453347	2	52	0.1	2.7
CG2170	cgp2593	272	273	371	124	601	429	0.4811	-1.05559	0.00599437	35911	3	13	0.5	2.4
CG2171	rpmA	266	267	0	0	0	1	0.5	-1	0.159563	35511	0	1	0	0.2
CG2172	rplU	305	306	0	0	0	1	0.5	-1	0.159447	46665	0	1	0	0.2
CG2173	rne	3065	3066	371	0	2116	2150	0.0872	-3.51953	0	4.59446e+06	2	72	0	1.2
CG2174	cgp2598	737	738	0	124	1705	1349	0.0409	-4.61176	1e-08	260155	1	34	0.1	2.3
CG2175	cgp2599	611	598	0	0	1568	1341	0.0003	-11.7027	0	167141	0	41	0	3.4
CG2176	tnp1d	1310	1311	0	0	184	142	0.0031	-8.33352	0.00404257	854772	0	7	0	0.3
CG2177	cgp2601	380	381	124	248	1038	895	0.1929	-2.37407	4.41e-06	68031	3	28	0.4	3.7
CG2178	cgp2602	452	453	0	248	1499	1610	0.0801	-3.64205	1.822e-05	98080.5	2	22	0.2	2.4
CG2179	ndk	410	411	0	0	1090	2081	0.0003	-11.7027	1e-08	78295.5	0	31	0	3.8
CG218	cgp0252	527	528	0	0	733	676	0.0007	-10.4804	2.1e-07	132792	0	25	0	2.4
CG2180	cgp2604	320	321	0	0	886	1134	0.0005	-10.9658	2.6e-05	48952.5	0	17	0	2.6
CG2181	cgp2605	344	345	0	124	304	264	0.2197	-2.18639	0.00185692	57792	1	11	0.1	1.6
CG2182	cgp2606	467	468	0	248	847	1203	0.1214	-3.04216	5.41e-05	105310	2	20	0.2	2.1
CG2183	cgp2607	425	426	0	0	527	29	0.0018	-9.11779	0.00129186	88821	0	9	0	1.1
CG2184	folC	1523	1519	0	0	1	3	0.2	-2.32193	0.0786838	1.15216e+06	0	2	0	0.1
CG2185	valS	2711	2712	247	0	329	187	0.4797	-1.0598	0.0169228	3.66934e+06	1	7	0	0.1
CG2186	cgp2610	1577	1578	248	372	4702	5150	0.063	-3.9885	0	1.17098e+06	5	101	0.2	3.2
CG2187	hscA	1454	1455	124	496	4274	3442	0.0805	-3.63487	0	1001150	5	90	0.2	3.1
CG2188	cgp2612	587	588	124	372	1724	1480	0.1551	-2.68873	5.33e-06	165536	4	30	0.3	2.6
CG2189	mdh	986	987	371	371	3222	2728	0.1249	-3.00115	0	462460	3	54	0.2	2.7
CG219	cgpt5007	87	88	0	0	0	0	1	0		3872	0	0	0	0
CG2190	cgp2614	779	776	0	0	8	122	0.0076	-7.03978	0.0125983	299148	0	5	0	0.3
CG2191	cgp2615	578	579	124	0	972	1032	0.0623	-4.00462	8.63e-06	161837	1	21	0.1	1.8
CG2192	vanA	1130	1131	124	248	2710	2966	0.0657	-3.92796	0	607383	3	61	0.1	2.7
CG2193	vanB	977	978	124	0	2298	2453	0.0263	-5.24879	0	457224	1	45	0.1	2.3
CG2194	vanK	1340	1341	124	495	4067	4803	0.0699	-3.83856	0	840895	4	95	0.1	3.5
CG2195	cgp2619	932	918	371	124	3811	1520	0.093	-3.42663	0	403491	3	43	0.2	2.3
CG2196	clpX	1280	1281	0	0	12	17	0.0333	-4.90833	0.0416122	818559	0	3	0	0.1
CG2197	cgp2621	1088	1075	124	124	4347	2910	0.0343	-4.86565	0	538618	2	76	0.1	3.5
CG2198	pcaJ	635	635	248	0	2506	1769	0.0582	-4.10284	0	184179	2	60	0.2	4.7
CG2199	pcaI	743	744	248	124	2613	2258	0.0766	-3.70651	0	259320	3	51	0.2	3.4
CG22	cgp0027	371	372	0	248	2222	1513	0.0666	-3.90833	6.9e-07	64370	2	28	0.3	3.8
CG220	cgp0253	281	278	0	0	780	959	0.0006	-10.7027	4.72e-06	36001	0	20	0	3.6
CG2200	pcaR	767	768	248	0	1897	1013	0.0855	-3.54793	0	280721	2	39	0.1	2.5
CG2201	pcaF	1226	1227	248	247	4110	3204	0.0678	-3.88257	0	709263	3	77	0.1	3.1
CG2202	pcaD	755	756	371	124	3717	3128	0.0725	-3.78588	0	262755	3	65	0.2	4.3
CG2203	pcaO	2063	2049	372	496	5267	5006	0.0846	-3.5632	0	1994880	7	110	0.2	2.7
CG2204	cgp2628	368	369	124	0	1619	1046	0.0469	-4.41427	1e-08	61999	1	34	0.1	4.6
CG2205	pcaB	1118	1118	124	0	2343	1936	0.0292	-5.09789	0	600374	1	46	0	2.1
CG2206	pcaG	614	589	124	248	3664	1904	0.067	-3.8997	0	159352	3	51	0.3	4.3
CG2207	pcaH	692	693	248	0	3142	2843	0.0416	-4.58727	0	220740	2	60	0.1	4.3
CG2208	cgp2633	1160	1161	124	248	4543	4015	0.0436	-4.51953	0	626992	3	86	0.1	3.7
CG2209	catC	293	294	248	0	970	1033	0.1243	-3.0081	2.868e-05	40434	2	21	0.3	3.6
CG221	cgp0254	1487	1488	0	372	4153	6223	0.0359	-4.79987	0	1023081	3	121	0.1	4.1
CG2210	catB	1121	1122	0	496	2583	3472	0.0821	-3.60647	0	599767	4	59	0.2	2.6
CG2211	catA	857	858	495	248	3591	3137	0.1106	-3.17658	0	347960	5	52	0.3	3
CG2212	benA	1493	1494	248	866	2685	3609	0.1771	-2.49736	0	1063157	7	78	0.2	2.6
CG2213	cgp2638	494	495	248	0	1345	1522	0.0868	-3.52616	2.22e-06	116582	2	26	0.2	2.6
CG2214	benC	1538	1535	124	124	2545	2071	0.0539	-4.21357	0	1140528	2	51	0.1	1.7
CG2215	benD	830	831	124	0	2533	1760	0.0291	-5.10284	0	328253	1	43	0.1	2.6
CG2216	benR	2687	2688	496	124	6171	7412	0.0457	-4.45166	0	3.46225e+06	5	119	0.1	2.2
CG2217	benK	1340	1341	124	371	4407	2469	0.0721	-3.79386	0	854944	3	71	0.1	2.6
CG2218	benE	1244	1245	248	0	1475	507	0.1256	-2.99309	9.2e-07	758846	2	28	0.1	1.1
CG2219	clpP2	626	627	0	0	1	27	0.0345	-4.85726	0.0787324	195938	0	2	0	0.2
CG222	cgp0255	371	372	0	0	925	845	0.0006	-10.7027	1e-08	63612	0	30	0	4
CG2220	clpP1	593	594	0	0	0	0	1	0		176418	0	0	0	0
CG2221	tig	1349	1350	0	248	303	6709	0.0355	-4.81604	0	865382	2	70	0.1	2.6
CG2222	cgpt5045	73	74	0	0	0	0	1	0		2738	0	0	0	0
CG2223	cgp2648	497	498	0	495	639	769	0.352	-1.50635	1.938e-05	119040	2	23	0.2	2.3
CG2224	cgp2649	1028	1028	0	372	2004	3404	0.069	-3.85726	0	497598	3	64	0.1	3.1
CG2225	cgp2650	458	455	0	124	1549	2379	0.0318	-4.97483	6e-08	96919	1	32	0.1	3.5
CG2226	cgpt5046	74	75	0	0	0	0	1	0		2812.5	0	0	0	0
CG2227	cgp2651	251	252	0	0	182	740	0.0011	-9.82828	0.00013224	30114	0	13	0	2.6
CG2228	tnp12a	440	441	0	0	493	1047	0.0006	-10.7027	2.745e-05	93712.5	0	17	0	1.9
CG2229	tnp12b	302	303	0	0	1352	733	0.0005	-10.9658	1e-07	41965.5	0	28	0	4.6
CG223	cgp0256	893	885	248	124	2268	936	0.1164	-3.10284	0	373950	3	43	0.2	2.4
CG2230	cgp2657	887	888	0	0	1188	2209	0.0003	-11.7027	0	374292	0	47	0	2.6
CG2231	rpi	473	474	0	0	0	0	1	0		112338	0	0	0	0
CG2232	cgp2659	698	699	248	124	2242	2333	0.0815	-3.61706	2.2e-07	233835	3	33	0.2	2.4
CG2233	cgp2660	101	102	124	0	101	99	0.6219	-0.685245	0.286672	5152	1	2	0.5	1
CG2234	cgp2661	611	612	124	0	1509	2420	0.0318	-4.97483	0	176874	1	35	0.1	2.9
CG2235	pepN	2603	2604	867	992	6672	7350	0.1326	-2.91485	0	3208653	14	155	0.3	3
CG2236	cgp2663	107	108	0	0	0	0	1	0		5832	0	0	0	0
CG2237	cgp2664	1085	1086	248	0	1899	2054	0.063	-3.9885	3.2e-07	574506	2	31	0.1	1.4
CG2238	cgp2665	977	978	124	372	2300	2936	0.0949	-3.39745	0	455796	4	52	0.2	2.7
CG2239	cgp2666	668	669	0	124	1537	2072	0.0346	-4.85308	2e-08	213417	1	32	0.1	2.4
CG224	moeB	1073	1074	496	248	1724	1527	0.2291	-2.12595	1e-08	554814	6	47	0.3	2.2
CG2240	cgp2667	158	159	0	0	371	90	0.0022	-8.82828	0.0414701	12402	0	3	0	0.9
CG2241	crtl	329	304	0	124	279	817	0.1139	-3.13416	6.804e-05	43781.5	1	17	0.2	2.8
CG2242	crtl'	1187	1188	248	248	2690	1950	0.1071	-3.22297	0	678400	4	52	0.2	2.2
CG2243	crtB	863	860	124	247	1296	2582	0.0959	-3.38233	1e-08	354776	2	38	0.1	2.2
CG2244	cgp2673	1121	1122	372	372	2909	4784	0.0968	-3.36885	0	595833	6	66	0.3	2.9
CG2245	cgp2674	1235	1236	0	0	6364	6151	0.0001	-13.2877	0	706374	0	96	0	3.9
CG2246	cgp2675	1643	1644	620	743	4613	8368	0.1051	-3.25017	0	1265323	10	115	0.3	3.5
CG2247	cgp2676	884	885	248	248	3981	3369	0.0676	-3.88683	0	365535	4	63	0.2	3.6
CG2248	cgp2677	941	942	248	371	4621	4495	0.068	-3.87832	0	412650	4	71	0.2	3.8
CG2249	cgp2678	1709	1710	496	495	8790	8419	0.0576	-4.11779	0	1.34596e+06	7	148	0.2	4.3
CG225	moaE	458	444	124	124	2543	788	0.0747	-3.74275	1.815e-05	94134	2	22	0.2	2.5
CG2250	cgp2679	1943	1944	744	372	6662	5779	0.0898	-3.47714	0	1.77319e+06	9	130	0.2	3.3
CG2251	cgp2680	1370	1371	248	495	3238	4603	0.0949	-3.39745	0	879630	5	94	0.2	3.4
CG2252	cgp2683	1553	1554	124	372	1544	967	0.1979	-2.33716	7e-08	1181088	4	40	0.1	1.3
CG2253	cgp2684	749	746	0	0	1087	1425	0.0004	-11.2877	1e-08	266695	0	31	0	2.1
CG2254	cgp2685	710	711	124	124	1371	1129	0.0996	-3.32771	1e-08	240700	2	36	0.1	2.5
CG2255	cgp2686	740	741	124	496	4466	5828	0.0603	-4.0517	0	252761	5	68	0.3	4.6
CG2256	metB	1160	1161	248	0	4069	2842	0.036	-4.79586	0	630472	2	80	0.1	3.4
CG2257	cgp2688	785	786	0	248	1007	1761	0.0899	-3.47554	1e-08	295553	2	36	0.1	2.3
CG2258	glbO	395	396	248	124	1134	1396	0.1474	-2.76219	0.00029257	75256.5	3	19	0.4	2.4
CG2259	chrA	1130	1127	248	124	2574	3920	0.0574	-4.12281	0	598473	3	69	0.1	3.1
CG226	moaB	473	458	124	124	2549	847	0.0733	-3.77004	0	95973	2	41	0.2	4.5
CG2260	cgp2691	629	630	0	0	478	291	0.0013	-9.58727	4.926e-05	193725	0	15	0	1.2
CG2261	cgp2692	467	467	0	0	1	0	0.5	-1	0.159174	108811	0	1	0	0.1
CG2262	cgp2693	623	624	0	0	1192	981	0.0005	-10.9658	1e-08	185016	0	31	0	2.5
CG2263	cgp2694	164	165	0	0	78	221	0.0033	-8.24332	0.00214131	12952.5	0	9	0	2.7
CG2264	cgp2695	1670	1671	0	0	0	1	0.5	-1	0.1588	1395285	0	1	0	0
CG2265	cgp2697	617	618	124	124	723	1321	0.1218	-3.03741	1.4e-06	183254	2	27	0.2	2.2
CG2266	cgp2699	2153	2154	0	0	0	2	0.3333	-1.58511	0.0786737	2317704	0	2	0	0
CG2267	cgpt5047	76	77	0	0	0	0	1	0		2964.5	0	0	0	0
CG2268	phoB	1421	1422	248	248	4968	5058	0.0496	-4.33352	0	933673	4	116	0.1	4.1
CG2269	cgpt5048	75	76	0	0	0	0	1	0		2888	0	0	0	0
CG227	moaC	470	471	0	371	1351	1768	0.1192	-3.06854	2e-08	103634	1	32	0.1	3.4
CG2270	cgp2701	641	642	248	124	2047	2355	0.0847	-3.56149	0	191992	3	47	0.2	3.7
CG2271	cgp2703	914	915	372	0	3645	3878	0.0496	-4.33352	0	393939	3	59	0.2	3.2
CG2272	cgp2704	845	846	124	372	2961	3605	0.0757	-3.72356	0	338432	4	50	0.2	3
CG2273	cgp2705	1331	1332	496	620	6864	5606	0.0896	-3.48036	0	820071	9	112	0.3	4.2
CG2274	cgp2707	1244	1245	619	372	5247	5142	0.0955	-3.38836	0	716029	7	106	0.3	4.3
CG2275	msiK1	1130	1131	620	619	3484	3991	0.1659	-2.59161	0	599061	9	82	0.4	3.6
CG2276	cgp2709	743	738	124	372	2698	1944	0.107	-3.22432	0	252468	4	59	0.3	4
CG2277	int3	692	693	248	619	3389	1868	0.1651	-2.59859	0	225973	5	46	0.4	3.3
CG2278	cgp2711	692	693	124	0	2862	1895	0.0263	-5.24879	0	224195	1	50	0.1	3.6
CG2279	cgp2712	563	482	0	0	1474	1382	0.0004	-11.2877	0	107727	0	36	0	3.7
CG228	moeA1	1187	1188	124	742	2558	3289	0.1483	-2.75341	0	665991	5	73	0.2	3.1
CG2280	dhaS	626	627	248	0	1211	1720	0.0849	-3.55809	1e-08	185928	2	36	0.2	2.9
CG2281	cgp2714	878	879	124	124	2237	2339	0.0544	-4.20025	0	364812	2	52	0.1	3
CG2282	cgp2715	1184	1185	496	496	2757	2368	0.1937	-2.3681	0	664941	8	71	0.3	3
CG2283	hyi	752	753	124	248	1989	2442	0.0842	-3.57004	0	265857	3	53	0.2	3.5
CG2284	cgp2717	800	801	0	0	0	0	1	0		320800	0	0	0	0
CG2285	ornA	659	660	124	0	1899	1467	0.0371	-4.75244	0	205926	1	38	0.1	2.9
CG2286	cgp2719	1244	1241	0	0	1735	3049	0.0002	-12.2877	0	738395	0	51	0	2.1
CG2287	lppS	1211	1212	496	248	5785	4417	0.073	-3.77596	0	681246	6	95	0.2	3.9
CG2288	cgpt5049	75	76	0	0	0	0	1	0		2888	0	0	0	0
CG2289	cgpt5050	72	73	0	0	0	0	1	0		2664.5	0	0	0	0
CG229	modB	839	840	372	124	2349	3069	0.0917	-3.44693	0	332676	4	55	0.2	3.3
CG2290	cgp2722	647	648	248	0	2035	1555	0.0693	-3.851	2e-08	199271	2	36	0.2	2.8
CG2291	cgp2724	152	149	0	0	323	330	0.0015	-9.38082	0.00680408	10653.5	0	6	0	2
CG2292	tnp1b	1310	1311	0	0	0	0	1	0		859360	0	0	0	0
CG2293	cgp2726	209	210	0	0	111	230	0.0029	-8.42973	0.00690436	21420	0	6	0	1.4
CG2294	cgp2727	641	638	618	124	2304	2094	0.1689	-2.56576	1e-08	191755	3	41	0.2	3.2
CG2295	glsK	1241	1242	743	0	2523	2744	0.1412	-2.82419	0	736592	5	61	0.2	2.5
CG2296	cgp4010	311	148	0	0	200	0	0.005	-7.64386	0.0414581	10730	0	3	0	1
CG2297	cgp2729	455	456	248	0	1349	1928	0.076	-3.71786	9e-08	97146	2	32	0.2	3.5
CG2298	cgp2730	479	476	124	124	34	654	0.3614	-1.46833	0.00218028	110679	2	13	0.2	1.4
CG2299	uxaC	1556	1557	124	248	3415	3362	0.055	-4.18442	0	1162335	3	69	0.1	2.2
CG23	cgp0029	995	992	743	124	3945	2764	0.1294	-2.95009	0	461374	5	69	0.3	3.5
CG230	modA	806	787	0	372	1471	2934	0.0847	-3.56149	0	294766	3	41	0.2	2.6
CG2300	gntV	503	504	0	124	573	1294	0.0669	-3.90185	8.4e-06	121974	1	21	0.1	2.1
CG2301	cgp2733	1166	1167	247	372	1267	2134	0.1822	-2.45641	1.35e-06	664636	4	32	0.2	1.4
CG2302	pncA	560	561	124	372	1318	1669	0.1663	-2.58814	2e-06	149823	4	31	0.4	2.8
CG2303	cgp2735	275	276	0	0	10	137	0.0068	-7.20025	0.0124622	37398	0	5	0	0.9
CG2304	bcp	476	477	0	124	875	900	0.0704	-3.82828	9.5e-07	108047	1	25	0.1	2.6
CG2305	cgp2737	611	612	124	0	34	0	3.5714	1.83649	0.282649	186967	1	2	0.1	0.2
CG2306	ppt1	407	397	0	0	65	0	0.0152	-6.03978	0.159266	78606	0	1	0	0.1
CG2307	cgp2739	1427	1428	372	0	3509	2706	0.06	-4.05889	0	961125	3	85	0.1	3
CG2308	cgp2740	326	327	248	0	1119	411	0.1626	-2.6206	0.00042847	51181.5	2	17	0.3	2.6
CG2309	cgp2741	407	408	124	0	1245	654	0.0658	-3.92577	4.102e-05	79768	1	18	0.1	2.2
CG231	cgp0264	257	258	124	124	961	780	0.1429	-2.80692	0.00120141	31738	2	14	0.4	2.7
CG2310	fas-IA	8990	8991	0	0	192	225	0.0024	-8.70275	0	40243716	0	39	0	0.2
CG2311	cgp2745	206	207	0	0	917	812	0.0006	-10.7027	7.5e-07	19147.5	0	22	0	5.3
CG2312	cgp2746	1184	1185	248	371	3409	4366	0.0797	-3.64928	0	663058	4	73	0.2	3.1
CG2313	cgp2747	575	576	124	124	878	1234	0.1178	-3.08559	1.915e-05	160136	2	23	0.2	2
CG2314	cgpt5051	84	85	0	0	0	0	1	0		3612.5	0	0	0	0
CG2315	cgp2748	464	465	0	0	101	3	0.0095	-6.71786	0.0226341	107182	0	4	0	0.4
CG2316	cgp2750	356	357	0	0	0	12	0.0769	-3.70087	0.159334	63546	0	1	0	0.1
CG2317	cgp2751	620	621	0	618	1203	2277	0.1778	-2.49167	1.7e-07	183839	2	31	0.2	2.5
CG2318	rph	737	738	124	124	838	1849	0.0926	-3.43284	1e-08	259796	2	37	0.1	2.5
CG2319	cgp2755	248	249	124	0	877	723	0.0781	-3.67853	6.96e-06	28516	1	21	0.2	4.2
CG232	cgp0265	914	911	743	124	1885	1748	0.2389	-2.06552	1e-08	396812	5	46	0.3	2.5
CG2320	cgp2756	695	696	372	0	1159	507	0.2238	-2.15972	8.5e-06	234228	3	26	0.2	1.9
CG2321	tnp15a	584	585	0	124	283	307	0.2115	-2.24127	0.0167825	169359	1	7	0.1	0.6
CG2322	cgp2758	1325	1326	248	0	3092	4615	0.0323	-4.95232	0	829448	2	77	0.1	2.9
CG2323	tnp15b	536	519	124	0	461	0	0.2706	-1.88577	0.0895765	133902	1	4	0.1	0.4
CG2324	cgp2760	629	630	124	124	1542	1544	0.0807	-3.63129	1.35e-06	190578	2	27	0.2	2.1
CG2325	cgp2761	767	768	124	248	678	2020	0.1382	-2.85517	2e-08	281502	3	39	0.2	2.5
CG2326	murI	842	843	0	0	1	77	0.0127	-6.29903	0.0787112	354482	0	2	0	0.1
CG2327	cgp2765	620	621	124	248	1607	2041	0.1022	-3.29053	0	180117	3	44	0.2	3.5
CG2328	cgp2766	494	495	0	0	951	116	0.0009	-10.1178	2.789e-05	118552	0	16	0	1.6
CG2329	cgp2767	749	750	496	0	2269	1408	0.1351	-2.8879	0	266655	4	44	0.3	2.9
CG233	cgp0266	422	412	0	0	617	1129	0.0006	-10.7027	5.9e-07	80134	0	23	0	2.8
CG2330	cgp2768	914	911	124	247	1514	751	0.1642	-2.60647	0	398140	2	39	0.1	2.1
CG2331	cgp2770	539	539	0	372	660	853	0.2464	-2.02093	0.00050315	141236	3	18	0.3	1.7
CG2332	clpS	374	375	248	124	1622	2489	0.0907	-3.46275	0	63405	3	40	0.4	5.3
CG2333	cgp2773	551	552	248	248	2438	1782	0.1177	-3.08681	8e-08	143266	4	38	0.4	3.4
CG2334	cgp2774	1340	1337	124	124	487	1068	0.16	-2.64386	2e-07	874423	2	32	0.1	1.2
CG2335	cgp6023	110	111	0	0	600	402	0.001	-9.96578	0.00204944	5716.5	0	8	0	3.6
CG2336	cgp2775	308	309	124	247	947	919	0.1993	-2.32699	1.756e-05	44666.5	2	22	0.3	3.6
CG2337	dinG	1877	1862	248	124	2768	2144	0.0759	-3.71976	0	1676791	3	64	0.1	1.7
CG2338	cgp2777	893	894	124	372	4077	5177	0.0537	-4.21893	0	371974	4	69	0.2	3.9
CG2339	cgp2778	623	624	124	124	1928	1099	0.0822	-3.60472	1e-08	184100	2	36	0.2	2.9
CG234	pat	1025	1026	372	248	1921	2884	0.1292	-2.95232	0	497698	5	62	0.2	3
CG2340	serB	1301	1302	0	248	974	878	0.1344	-2.89539	0	822896	2	40	0.1	1.5
CG2341	ctaD	1754	1755	0	0	23	270	0.0034	-8.20025	0.00133564	1532115	0	9	0	0.3
CG2342	nrdF	1004	1005	0	0	0	1	0.5	-1	0.158896	504510	0	1	0	0
CG2343	ftn	488	489	0	0	1467	361	0.0005	-10.9658	3.16e-06	114670	0	20	0	2
CG2344	gntR1	752	749	248	0	1389	1293	0.0928	-3.42973	1e-07	269284	2	32	0.1	2.1
CG2345	cgp2784	662	663	0	0	1417	436	0.0005	-10.9658	6.6e-07	212160	0	23	0	1.7
CG2346	cgp2785	278	279	0	0	0	0	1	0		38920.5	0	0	0	0
CG2347	nrdE	2147	2148	0	0	0	1	0.5	-1	0.158768	2305878	0	1	0	0
CG2348	nrdI	446	447	0	0	32	42	0.0133	-6.23243	0.0787658	99457.5	0	2	0	0.2
CG2349	cgp2788	110	111	0	0	0	421	0.0024	-8.70275	0.0413997	5994	0	3	0	1.4
CG235	cgpt5008	88	89	0	0	0	0	1	0		3960.5	0	0	0	0
CG2350	mrx2	233	234	0	0	0	38	0.0256	-5.28771	0.159692	27261	0	1	0	0.2
CG2351	rpmJ	122	123	0	0	0	42	0.0233	-5.42353	0.16063	7503	0	1	0	0.4
CG2352	nadE	833	834	247	0	0	8	27.5556	4.78427	0.282436	347362	1	2	0.1	0.1
CG2353	cgp2793	749	746	124	124	3015	1842	0.0513	-4.2849	0	261863	2	46	0.1	3.1
CG2354	cgp2794	413	414	248	124	1270	1385	0.1404	-2.83239	2.6e-06	80541	3	30	0.4	3.6
CG2355	cgp2795	1022	1023	0	0	2027	2121	0.0002	-12.2877	0	497178	0	53	0	2.6
CG2356	cgp2796	1373	1374	372	124	4961	4243	0.054	-4.2109	0	879460	4	99	0.1	3.6
CG2357	cgp2797	836	837	0	0	749	845	0.0006	-10.7027	1e-08	336892	0	32	0	1.9
CG2358	cgpt5052	75	76	0	0	0	87	0.0114	-6.45482	0.16186	2850	0	1	0	0.7
CG2359	cgp2799	794	795	0	0	160	83	0.0041	-7.93016	0.0126001	314025	0	5	0	0.3
CG236	cgpt5009	75	76	0	0	0	0	1	0		2888	0	0	0	0
CG2360	pgm	1664	1665	744	496	5681	5803	0.1081	-3.20956	0	1294000	10	124	0.3	3.7
CG2361	cgp2801	290	287	248	0	747	229	0.2549	-1.972	0.0012592	39472.5	2	15	0.3	2.6
CG2362	cgp2802	326	327	0	0	165	127	0.0034	-8.20025	0.00394454	52320	0	7	0	1.1
CG2363	cgp2803	794	795	124	248	2661	2094	0.0784	-3.673	0	296175	3	59	0.2	3.7
CG2364	cgp2804	1367	1368	248	0	3360	3965	0.034	-4.87832	0	880343	2	83	0.1	3
CG2365	psp4	1622	1623	248	124	3274	3000	0.0594	-4.07339	0	1257888	3	76	0.1	2.3
CG2366	cgp2806	356	357	0	0	468	251	0.0014	-9.48036	0.00013883	61404	0	13	0	1.8
CG2367	tnp11a	449	450	124	0	620	633	0.0997	-3.32626	0.00021362	98105.5	1	15	0.1	1.7
CG2368	tnp13a	1403	1404	0	0	0	0	1	0		985608	0	0	0	0
CG2369	cgp2809	716	717	124	0	884	795	0.0744	-3.74855	1.04e-06	248446	1	27	0.1	1.9
CG237	cgp0269	908	909	124	124	1834	1192	0.0823	-3.60296	0	395436	2	42	0.1	2.3
CG2370	cgp2810	1397	1398	619	372	4470	5678	0.0977	-3.3555	0	909538	6	104	0.2	3.7
CG2371	cgp2811	2561	2562	0	0	901	2303	0.0003	-11.7027	0	3212748	0	54	0	1.1
CG2372	cgp2812	854	854	0	248	114	271	0.6451	-0.632405	0.0289757	362104	2	8	0.1	0.5
CG2373	cgpr5107	119	120	0	0	0	0	1	0		7200	0	0	0	0
CG2374	cgpr5131	3086	3087	0	0	0	0	1	0		4.76478e+06	0	0	0	0
CG2375	cgpr5119	1523	1524	0	0	0	0	1	0		1161288	0	0	0	0
CG2376	cgp2822	680	681	991	372	5938	5560	0.1186	-3.07582	0	203436	10	101	0.7	7.4
CG2377	cgp2823	674	675	0	124	5744	4134	0.0127	-6.29903	0	201499	1	80	0.1	5.9
CG2378	cgp2824	527	528	0	0	682	32	0.0014	-9.48036	1.633e-05	134904	0	17	0	1.6
CG2379	cgpr5109	119	120	0	0	0	0	1	0		7200	0	0	0	0
CG238	cgp0270	284	285	0	0	843	798	0.0006	-10.7027	1.452e-05	38190	0	17	0	3
CG2380	cgpr5133	3086	3087	0	0	0	0	1	0		4.76478e+06	0	0	0	0
CG2381	cgpr5121	1523	1524	0	0	0	0	1	0		1161288	0	0	0	0
CG2382	cgp2828	197	198	0	0	0	0	1	0		19602	0	0	0	0
CG2383	murA2	1256	1257	0	0	11	0	0.0833	-3.58554	0.158848	789396	0	1	0	0
CG2384	pduO	572	573	495	0	3938	2240	0.0803	-3.63846	0	153016	3	42	0.3	3.7
CG2385	ramA	845	846	0	124	114	241	0.3511	-1.51005	0.00022336	351944	1	16	0.1	0.9
CG2386	cysK	935	936	0	0	2	1	0.25	-2	0.0787051	437112	0	2	0	0.1
CG2387	cysE	566	567	124	0	0	18	6.5789	2.71785	0.5	160745	1	1	0.1	0.1
CG2388	cgp2835	290	291	0	0	200	409	0.0016	-9.28771	0.00126556	41031	0	10	0	1.7
CG2389	cgpt5053	75	76	0	0	1	0	0.5	-1	0.16186	2850	0	1	0	0.7
CG239	cgp0272	764	765	372	248	5666	6424	0.0514	-4.28209	0	269330	5	68	0.3	4.4
CG2390	cgpt5054	73	74	0	0	0	0	1	0		2738	0	0	0	0
CG2391	sucD	884	885	248	248	2456	2739	0.0957	-3.38534	0	367768	4	59	0.2	3.3
CG2392	sucC	1208	1209	124	371	2716	4405	0.0696	-3.84477	0	691604	3	69	0.1	2.9
CG2393	cgpt5055	73	74	0	0	0	0	1	0		2738	0	0	0	0
CG2394	cgpt5056	75	76	0	0	0	0	1	0		2888	0	0	0	0
CG2395	cgp2838	737	738	124	372	1940	1985	0.1266	-2.98165	6e-08	259804	4	38	0.3	2.6
CG2396	cgp2839	821	822	124	124	3883	2354	0.0399	-4.64747	0	316078	2	56	0.1	3.4
CG2397	cgpt5057	72	73	0	0	0	0	1	0		2664.5	0	0	0	0
CG2398	actA	1508	1509	743	124	3635	5485	0.0952	-3.39289	0	1.06475e+06	6	107	0.2	3.5
CG2399	cgp2841	1145	1146	371	742	4341	4530	0.1256	-2.99309	0	608682	5	90	0.2	3.9
CG24	cgp0031	176	177	0	247	46	618	0.3729	-1.42314	0.0898563	15400	1	4	0.3	1.1
CG240	cgp0273	1019	1019	248	0	1782	928	0.0918	-3.44536	4e-08	502892	2	34	0.1	1.7
CG2400	phoU	734	735	0	372	2228	1922	0.0899	-3.47554	0	251415	3	56	0.2	3.8
CG2401	pstB	773	774	248	0	3199	2413	0.0444	-4.4933	0	276346	2	63	0.1	4.1
CG2402	pstA	923	924	620	248	3572	3753	0.1186	-3.07582	0	391923	7	85	0.4	4.6
CG2403	pstC	1067	1068	248	124	3478	4372	0.0475	-4.39593	0	533502	3	73	0.1	3.4
CG2404	pstS	1127	1128	248	495	3536	2583	0.1216	-3.03978	0	593464	5	82	0.2	3.6
CG2405	mshD	878	879	124	0	2477	2334	0.026	-5.26534	0	363482	1	53	0.1	3
CG2406	cgp2848	785	786	0	0	744	1054	0.0006	-10.7027	3e-08	297501	0	29	0	1.8
CG2407	cgp2849	1076	1073	0	248	2978	3785	0.0368	-4.76415	0	543498	2	63	0.1	2.9
CG2408	cgp2850	689	690	0	0	0	1	0.5	-1	0.159006	237705	0	1	0	0.1
CG2409	cgp2851	944	945	124	372	2865	1801	0.1065	-3.23107	0	417756	4	65	0.2	3.4
CG241	cgp0274	803	804	866	0	1916	1710	0.239	-2.06492	2e-08	308788	4	40	0.2	2.5
CG2410	cgp2852	1103	1104	124	247	938	714	0.225	-2.152	0.00371041	603894	2	12	0.1	0.5
CG2411	cgp2853	215	216	0	0	12	0	0.0769	-3.70087	0.159778	23220	0	1	0	0.2
CG2412	cgp2854	1514	1515	0	0	0	0	1	0		1.14761e+06	0	0	0	0
CG2413	purM	1076	1077	0	124	400	576	0.1279	-2.96691	6.6e-07	566512	1	26	0	1.2
CG2414	purF	1547	1548	0	0	716	548	0.0008	-10.2877	2e-08	1174932	0	30	0	1
CG2415	cgp2859	377	378	124	0	1466	473	0.0644	-3.9568	7.86e-06	67666.5	1	21	0.1	2.8
CG2416	cgp2860	1019	1020	124	0	2680	2797	0.0228	-5.45482	0	482480	1	77	0	3.8
CG2417	cgp2861	764	765	124	124	2994	2401	0.0461	-4.43909	0	271606	2	59	0.1	3.9
CG2418	purL	2288	2289	248	0	951	1669	0.095	-3.39593	0	2.56715e+06	2	49	0	1.1
CG2419	purQ	671	672	0	0	417	218	0.0016	-9.28771	9.81e-06	219744	0	18	0	1.3
CG242	mgtE2	1310	1311	124	495	2269	2991	0.1178	-3.08559	0	819429	3	65	0.1	2.5
CG2420	cgp2865	245	242	0	0	71	114	0.0054	-7.53282	0.00389913	28435	0	7	0	1.4
CG2421	gpx	479	480	0	0	1171	1374	0.0004	-11.2877	0	107040	0	34	0	3.5
CG2422	nuc	2750	2751	744	124	7540	9034	0.0524	-4.25429	0	3561439	7	170	0.1	3.1
CG2423	cgp2869	689	690	124	0	1494	1374	0.0436	-4.51953	0	223575	1	43	0.1	3.1
CG2424	dctA	1340	1341	372	248	3254	2830	0.1021	-3.29195	0	852323	5	75	0.2	2.8
CG2425	ptrB	2120	2121	496	495	4262	4419	0.1143	-3.1291	0	2145597	7	107	0.2	2.5
CG2426	purC	893	894	0	0	1	66	0.0147	-6.08804	0.0416035	398277	0	3	0	0.2
CG2427	cgp2875	116	117	0	62173	0	450	137.858	7.10704	0.145702	7027	6	3	2.6	1.3
CG2428	purB	1430	1431	0	0	0	3	0.25	-2	0.0416143	1021734	0	3	0	0.1
CG2429	cgp2877	1151	1152	26082	742	4823	3951	3.057	1.61212	0	631428	8	67	0.3	2.9
CG243	dccT	1583	1584	124	1237	5772	5281	0.1232	-3.02093	0	1174758	7	109	0.2	3.4
CG2430	purD	1265	1266	124	0	1036	726	0.0709	-3.81807	0	767222	1	55	0	2.2
CG2431	cgp2880	410	411	0	124	892	1107	0.0625	-4	3e-07	79124	1	29	0.1	3.5
CG2432	cgp2883	755	756	0	0	1063	1611	0.0004	-11.2877	2e-08	274428	0	30	0	2
CG2433	cgp2884	1445	1446	124	372	4579	3575	0.0609	-4.03741	0	989827	4	83	0.1	2.9
CG2434	bioA	1271	1272	247	372	2790	2768	0.1115	-3.16488	0	775982	4	56	0.2	2.2
CG2435	bioD	674	652	248	248	2083	984	0.162	-2.62593	1.5e-07	202152	4	36	0.3	2.8
CG2436	cgtS3	1457	1458	372	620	3681	4073	0.128	-2.96578	0	1008339	8	86	0.3	2.9
CG2437	cgtR3	707	708	124	0	1642	1430	0.0407	-4.61883	0	235425	1	44	0.1	3.1
CG2438	cgp2889	755	756	372	248	2936	2072	0.124	-3.01159	3e-07	273704	5	37	0.3	2.4
CG2439	cgp2890	1031	1032	372	124	3608	3909	0.0661	-3.91921	0	494396	4	81	0.2	3.9
CG244	cgpt5010	72	73	0	0	0	0	1	0		2664.5	0	0	0	0
CG2440	pqo	1739	1736	124	247	6485	6134	0.0295	-5.08314	0	1403630	2	127	0.1	3.7
CG2441	cgp2892	176	177	0	0	71	113	0.0054	-7.53282	0.0123446	15222	0	5	0	1.4
CG2442	cgp2893	1484	1474	372	247	2741	2488	0.1185	-3.07704	0	1043655	4	64	0.1	2.2
CG2443	cgp2894	533	534	124	0	991	196	0.1052	-3.24879	7.323e-05	138310	1	17	0.1	1.6
CG2444	cgp2895	1322	1323	496	124	2438	4798	0.0858	-3.54288	0	836196	5	64	0.2	2.4
CG2445	cgp2896	2144	2145	496	742	7387	7315	0.0843	-3.56832	0	2147507	8	155	0.2	3.6
CG2446	cgp2898	950	951	619	124	2141	3852	0.1241	-3.01042	0	428015	5	57	0.3	3
CG2447	cgp2899	707	708	124	0	609	1331	0.0644	-3.9568	2.566e-05	244264	1	19	0.1	1.3
CG2448	ddh	962	963	495	0	2983	2457	0.0912	-3.45482	0	439169	3	55	0.2	2.9
CG2449	cgp2901	815	816	0	0	942	1919	0.0003	-11.7027	0	315792	0	42	0	2.6
CG245	tyrA	1022	1023	0	0	2	214	0.0046	-7.76415	0.0226974	521218	0	4	0	0.2
CG2450	cgp2902	815	802	0	124	1677	1865	0.0353	-4.82419	0	302772	1	49	0.1	3.1
CG2451	cgp2903	431	432	0	0	2159	945	0.0003	-11.7027	1.2e-07	87696	0	27	0	3.1
CG2452	cgp2904	401	402	248	0	592	869	0.1703	-2.55385	0.00074797	78196	2	15	0.2	1.9
CG2453	cgpt5058	75	76	0	0	0	0	1	0		2888	0	0	0	0
CG2454	thrE	1469	1470	496	248	4192	2544	0.1106	-3.17658	0	1027632	6	79	0.2	2.7
CG2455	cgp2906	329	330	988	371	7	0	170	7.40939	0.153065	54954	6	3	0.9	0.5
CG2456	otsA	1457	1454	2104	2104	26	25	80.9423	6.33882	0.148645	1.06158e+06	21	15	0.7	0.5
CG2457	cgp2908	488	489	0	0	890	680	0.0006	-10.7027	1.83e-06	114426	0	21	0	2.1
CG2458	otsB	770	771	0	0	31	0	0.0312	-5.00231	0.158969	296835	0	1	0	0.1
CG2459	cgp2910	1082	1083	0	371	3601	3984	0.049	-4.35107	0	543721	2	84	0.1	3.9
CG246	cgp0280	494	494	0	0	1101	399	0.0007	-10.4804	3.17e-06	117078	0	20	0	2
CG2460	cgp2911	944	945	248	248	2283	4683	0.0713	-3.80995	0	416795	4	68	0.2	3.6
CG2461	cgp2912	692	693	0	372	3243	1391	0.0805	-3.63487	0	225938	3	44	0.2	3.2
CG2462	cgp2913	881	882	619	371	4048	3355	0.1338	-2.90185	0	369181	6	52	0.3	2.9
CG2463	tnp5b	1502	1503	0	0	0	0	1	0		1.1295e+06	0	0	0	0
CG2464	cgp2915	203	204	0	0	0	177	0.0056	-7.48036	0.0789044	20604	0	2	0	0.5
CG2465	ksdD	1691	1692	248	744	6256	8131	0.069	-3.85726	0	1333420	8	126	0.2	3.7
CG2466	cgp2917	749	750	248	248	2266	1404	0.1354	-2.8847	1.6e-07	269278	4	36	0.3	2.4
CG2467	cgp2918	620	621	124	0	1641	1694	0.0375	-4.73697	0	182273	1	36	0.1	2.9
CG2468	cgp2919	437	418	124	124	1978	1100	0.0809	-3.62772	7.1e-07	81936	2	29	0.2	3.5
CG2469	cgp2920	857	858	248	0	2357	1917	0.0582	-4.10284	0	347516	2	51	0.1	3
CG247	cgp0281	479	480	0	0	3	61	0.0154	-6.02093	0.0787578	114720	0	2	0	0.2
CG2470	cgp2921	428	429	124	0	719	1201	0.0651	-3.9412	1.6e-06	87095	1	24	0.1	2.8
CG2471	cgp2922	656	657	124	0	680	726	0.0888	-3.4933	4.358e-05	210244	1	18	0.1	1.4
CG2472	cgp2923	941	942	0	124	0	356	0.3501	-1.51416	0.5	443682	1	1	0.1	0.1
CG2473	cysS	1382	1383	0	0	3	0	0.25	-2	0.0416136	954270	0	3	0	0.1
CG2474	ptsS	1985	1986	744	372	5691	6416	0.0923	-3.43753	0	1.84531e+06	9	138	0.2	3.5
CG2475	scrB	1289	1290	620	372	5585	6523	0.082	-3.60823	0	776724	8	94	0.3	3.6
CG2476	nagB	761	762	124	495	3993	3326	0.0847	-3.56149	0	265244	4	71	0.3	4.7
CG2477	nagA1	1166	1167	247	372	1905	2369	0.145	-2.78588	0	650089	4	59	0.2	2.5
CG2478	nanA	938	939	372	0	2875	2286	0.0723	-3.78986	0	417885	3	57	0.2	3
CG2479	cgp2932	911	912	0	124	3599	3569	0.0174	-5.84477	0	386702	1	67	0.1	3.7
CG248	cgp0282	203	204	0	124	1856	1341	0.0391	-4.67669	1.984e-05	18976.5	1	20	0.2	4.9
CG2480	nanE	698	699	0	248	1678	2122	0.0655	-3.93236	1e-08	232428	2	38	0.1	2.7
CG2481	cgp2934	179	180	0	0	410	533	0.0011	-9.82828	0.00021894	15120	0	12	0	3.3
CG2482	nanP	1217	1207	248	0	2916	4310	0.0345	-4.85726	0	684404	2	76	0.1	3.1
CG2483	cgp2936	722	723	124	0	1185	2495	0.034	-4.87832	0	248358	1	38	0.1	2.6
CG2484	cgp2937	1610	1611	496	372	4227	6148	0.0838	-3.57691	0	1.21726e+06	7	108	0.2	3.4
CG2485	cgp2938	965	966	124	372	1983	3899	0.0845	-3.5649	0	442480	4	55	0.2	2.8
CG2486	cgp2939	2003	2004	372	991	4320	5946	0.1329	-2.91159	0	1905046	9	112	0.2	2.8
CG2487	cgp2940	818	815	372	0	1693	2140	0.0973	-3.36142	0	314620	3	46	0.2	2.8
CG2488	cgp2941	623	624	248	248	2795	1779	0.1086	-3.2029	0	182244	4	46	0.3	3.7
CG2489	cgp2942	500	501	0	371	2262	1794	0.0917	-3.44693	5e-08	117753	2	33	0.2	3.3
CG249	cgpt5011	90	91	0	0	1	0	0.5	-1	0.161329	4095	0	1	0	0.5
CG2490	cgp2943	362	363	0	0	338	579	0.0011	-9.82828	8.011e-05	63343.5	0	14	0	1.9
CG2491	ispF	482	483	0	0	85	0	0.0116	-6.42973	0.0787571	116162	0	2	0	0.2
CG2492	ispD	770	763	0	0	7	0	0.125	-3	0.0787176	290322	0	2	0	0.1
CG2493	cgp2946	596	597	0	0	0	0	1	0		178204	0	0	0	0
CG2494	cgtR5	725	722	248	371	2269	3020	0.1172	-3.09296	0	236905	4	71	0.3	4.9
CG2495	cgtS5	1118	1119	495	372	2485	2811	0.1639	-2.60911	0	591516	6	69	0.3	3.1
CG2496	cgp2949	569	570	0	0	889	65	0.001	-9.96578	8.407e-05	158460	0	14	0	1.2
CG2497	radA	1394	1395	124	0	4029	2018	0.0207	-5.59423	0	920020	1	78	0	2.8
CG2498	cgp2951	1100	1092	0	124	3770	3131	0.0181	-5.78787	0	565120	1	60	0	2.7
CG2499	cgp2952	680	681	0	124	921	2338	0.0383	-4.70651	4e-08	221669	1	31	0.1	2.3
CG25	cgp0033	101	102	0	0	0	379	0.0026	-8.58727	0.0222218	4998	0	4	0	2
CG250	cgp0283	251	252	0	0	42	410	0.0022	-8.82828	0.00390611	30870	0	7	0	1.4
CG2500	cgp2953	1454	1455	124	371	3016	2140	0.0962	-3.37782	0	1011286	3	71	0.1	2.4
CG2501	cynT	623	624	248	0	82	1	2.9643	1.56769	0.328917	194379	2	3	0.2	0.2
CG2502	mutY	881	882	371	124	2173	1933	0.1208	-3.04931	0	365208	3	58	0.2	3.3
CG2503	cgp2956	1157	1158	124	248	2836	3515	0.0587	-4.0905	0	640406	3	55	0.1	2.4
CG2504	cgp2957	173	174	124	0	517	11	0.2363	-2.08131	0.00946587	14532	1	9	0.3	2.6
CG2505	butA	776	777	124	248	2244	1734	0.0937	-3.41581	1.71e-06	291759	3	29	0.2	1.9
CG2506	cgp2959	326	327	0	124	451	1274	0.0724	-3.78787	4.37e-06	50036	1	23	0.2	3.5
CG2507	cgp2960	743	744	0	124	603	853	0.0858	-3.54288	4.432e-05	270450	1	18	0.1	1.2
CG2508	cgp2962	293	294	0	0	541	778	0.0008	-10.2877	7.763e-05	41160	0	14	0	2.4
CG2509	clpC	2777	2778	0	0	246	473	0.0014	-9.48036	0.00045089	3843363	0	12	0	0.2
CG251	cgp0284	2405	2406	371	248	4188	4669	0.07	-3.8365	0	2.75743e+06	4	120	0.1	2.5
CG2510	guaB1	1433	1434	0	247	3961	5316	0.0267	-5.22702	0	967264	1	86	0	3
CG2511	cgp2965	1013	1014	0	248	1858	2663	0.0551	-4.1818	0	489782	2	51	0.1	2.5
CG2512	cgp2966	1883	1884	248	124	4799	4003	0.0424	-4.55979	0	1.67495e+06	3	111	0.1	2.9
CG2513	cgp2968	1718	1719	248	372	2850	2914	0.1077	-3.21491	0	1431130	5	59	0.1	1.7
CG2514	cgp2969	1943	1944	372	248	6899	5807	0.0489	-4.35402	0	1783690	5	117	0.1	3
CG2515	cgp2970	1724	1725	496	124	2704	2648	0.116	-3.1078	0	1440475	5	60	0.1	1.7
CG2516	lmrB	1445	1446	0	0	2163	2029	0.0002	-12.2877	0	1004970	0	56	0	1.9
CG2517	cgp2973	953	954	0	248	2461	2536	0.0498	-4.32771	0	433144	2	48	0.1	2.5
CG2518	lysS	1580	1581	0	0	2	1	0.25	-2	0.041616	1247409	0	3	0	0.1
CG2519	cgp2975	800	797	124	0	2393	2217	0.0271	-5.20556	0	298486	1	50	0.1	3.1
CG252	tgt	1256	1257	124	124	3244	3032	0.0397	-4.65472	0	742930	2	81	0.1	3.2
CG2520	cgp2976	695	695	0	372	1454	2108	0.1047	-3.25567	1e-08	229034	3	40	0.2	2.9
CG2521	cgp2977	749	750	124	124	892	1631	0.0987	-3.34081	5e-07	271140	2	29	0.1	1.9
CG2522	cgp2978	476	477	0	989	606	1031	0.6044	-0.726424	2.88e-06	108529	1	24	0.1	2.5
CG2523	folK	479	479	0	0	645	123	0.0013	-9.58727	0.00129819	112565	0	9	0	0.9
CG2524	folX	392	385	124	0	132	3	0.9191	-0.121706	0.158813	73728	1	4	0.1	0.5
CG2525	folP1	854	855	0	0	0	1	0.5	-1	0.158938	365085	0	1	0	0.1
CG2526	folE	605	606	0	0	0	0	1	0		183618	0	0	0	0
CG2527	ftsH	2561	2539	372	124	2062	2550	0.1077	-3.21491	0	3.10661e+06	4	98	0.1	1.9
CG2528	hpt	602	603	0	0	121	1	0.0081	-6.94786	0.0226606	180598	0	4	0	0.3
CG2529	tilS	944	945	124	0	563	0	0.2216	-2.17397	0.0897027	445095	1	4	0.1	0.2
CG253	cgp0286	740	719	371	0	1783	1185	0.1253	-2.99654	6e-08	247357	2	33	0.1	2.3
CG2530	dacB	1283	1284	248	620	3816	7296	0.0782	-3.67669	0	766669	7	98	0.3	3.8
CG2531	ppa	476	477	0	0	103	1	0.0095	-6.71786	0.022637	112810	0	4	0	0.4
CG2532	cgp2990	1541	1542	0	248	4989	4250	0.0269	-5.21625	0	1120306	2	92	0.1	3
CG2533	cgp2991	425	413	124	124	1453	986	0.102	-3.29336	5e-08	78900	2	33	0.2	4
CG2534	cgp2992	413	414	0	124	1324	634	0.0638	-3.9703	1.383e-05	81769	1	20	0.1	2.4
CG2535	cgp2993	500	497	371	0	2208	981	0.1166	-3.10036	3.79e-06	117799	2	25	0.2	2.5
CG2536	cgp2994	611	608	0	0	1127	1033	0.0005	-10.9658	2.2e-07	177232	0	26	0	2.1
CG2537	ptsX'	251	140	0	124	2	361	0.3434	-1.54204	0.0164703	9382.5	1	7	0.4	2.5
CG2538	ptsX	266	267	0	124	636	1065	0.0734	-3.76808	0.00019842	33779	1	15	0.2	2.8
CG2539	cgp2999	1235	1236	247	989	3788	5480	0.1335	-2.90509	0	712671	4	90	0.2	3.6
CG254	cgp0287	1082	1083	124	124	1601	1605	0.0776	-3.6878	0	564808	2	42	0.1	1.9
CG2540	cgp3000	290	291	0	124	1318	898	0.0564	-4.14816	0.00102271	40739	1	12	0.2	2.1
CG2541	cgp3001	446	447	124	0	197	517	0.1748	-2.51622	0.00108533	97450	1	13	0.1	1.5
CG2542	cgp3003	3887	3888	496	1239	11468	12140	0.0735	-3.76611	0	7.12935e+06	12	243	0.2	3.1
CG2543	gabD1	1565	1566	496	495	3641	5692	0.1063	-3.23379	0	1166004	7	86	0.2	2.7
CG2544	cgp3007	899	900	124	0	3524	3138	0.0188	-5.73312	0	367670	1	85	0.1	4.7
CG2545	porA	137	138	0	124	0	24	5	2.32193	0.285407	9454	1	2	0.4	0.7
CG2546	porH	173	174	866	124	5	252	3.8411	1.94152	0.496229	15140.5	3	3	0.9	0.9
CG2547	groEL	1646	1647	0	0	1	130	0.0076	-7.03978	0.0786811	1.35466e+06	0	2	0	0.1
CG2548	cgp3012	182	183	0	0	772	519	0.0008	-10.2877	7.013e-05	15463.5	0	15	0	4.1
CG2549	cgp3013	1211	1204	248	124	4286	2547	0.0546	-4.19496	0	677307	3	83	0.1	3.4
CG255	cgp0288	1439	1432	496	620	1755	3314	0.2203	-2.18246	0	985356	9	65	0.3	2.3
CG2550	cgp3014	965	966	0	371	1960	2862	0.0771	-3.69713	0	443427	2	51	0.1	2.6
CG2551	cgp3015	1964	1961	248	496	4382	4554	0.0834	-3.58381	0	1.82682e+06	6	105	0.2	2.7
CG2552	cgp3016	2456	2457	495	372	5479	6102	0.0749	-3.73889	0	2862645	6	133	0.1	2.7
CG2553	cgp3017	2801	2801	495	1486	6028	7626	0.1451	-2.78488	0	3732866	13	150	0.2	2.7
CG2554	cgp3018	3593	3594	991	992	13213	14279	0.0722	-3.79186	0	6035201	15	255	0.2	3.5
CG2555	cgp3019	2681	2682	992	372	6721	7245	0.0977	-3.3555	0	3387827	11	169	0.2	3.2
CG2556	cgp3020	614	608	0	124	1860	1165	0.0413	-4.59771	7e-08	176025	1	31	0.1	2.5
CG2557	tpdA	1373	1374	371	744	5793	7296	0.0853	-3.55131	0	867248	8	124	0.3	4.5
CG2558	cgp3022	560	561	124	0	1504	1785	0.038	-4.71786	0	146993	1	39	0.1	3.5
CG2559	mrpA	3059	3060	372	248	8829	7323	0.0384	-4.70275	0	4.42651e+06	5	176	0.1	2.9
CG256	gltX	881	882	248	124	1505	1268	0.1345	-2.89432	0	370490	3	45	0.2	2.6
CG2560	mrpC	491	484	124	124	486	398	0.2814	-1.82931	0.00611623	114955	2	11	0.2	1.1
CG2561	mrpD	1700	1701	496	496	4742	6887	0.0854	-3.54962	0	1352475	8	122	0.2	3.6
CG2562	mrpE	509	506	0	0	1433	2240	0.0003	-11.7027	0	119163	0	36	0	3.6
CG2563	mrpF	275	276	124	0	855	456	0.0953	-3.39138	2.201e-05	35609.5	1	19	0.2	3.4
CG2564	mrpG	380	381	0	124	1632	1256	0.0433	-4.52949	1.52e-06	68204	1	24	0.1	3.1
CG2565	cgp3030	599	600	248	124	1155	1229	0.1564	-2.67669	2.314e-05	173718	3	25	0.2	2.1
CG2566	cgp3031	1130	1131	0	0	1575	2477	0.0002	-12.2877	0	609609	0	53	0	2.3
CG2567	cgp3032	593	594	248	372	1983	2280	0.1456	-2.77992	1e-08	164875	5	44	0.4	3.7
CG2568	cgp3033	212	213	247	0	283	137	0.5891	-0.763416	0.0167727	22049	1	7	0.2	1.6
CG2569	def1	581	571	124	0	25	6	3.9062	1.96577	0.0293686	161596	1	6	0.1	0.5
CG257	cgp0291	992	986	248	372	3327	3138	0.096	-3.38082	0	454638	5	69	0.3	3.5
CG2570	cgp3035	1007	1008	124	248	3413	2235	0.066	-3.92139	0	479349	3	60	0.1	3
CG2571	xthA	791	792	0	0	885	319	0.0008	-10.2877	2.4e-07	303732	0	25	0	1.6
CG2572	cls	1502	1503	248	618	951	1487	0.3555	-1.49208	0	1.09502e+06	4	51	0.1	1.7
CG2573	cgp3038	1196	1197	124	247	2911	4479	0.0503	-4.3133	0	667979	2	85	0.1	3.6
CG2574	cgp3039	1310	1311	0	124	1833	3039	0.0257	-5.28209	0	820699	1	61	0	2.3
CG2575	cgp3040	842	839	0	124	2336	1259	0.0348	-4.84477	0	332676	1	47	0.1	2.8
CG2576	cgp3041	758	759	248	0	1827	993	0.0883	-3.50144	0	273640	2	42	0.1	2.8
CG2577	cgp3042	932	925	0	247	2934	3629	0.0378	-4.72547	0	395928	1	70	0.1	3.8
CG2578	cgp3043	494	495	124	742	2091	1844	0.2203	-2.18246	1e-08	113398	4	42	0.4	4.2
CG2579	cgp3044	1505	1506	0	124	746	605	0.0925	-3.4344	0	1106173	1	38	0	1.3
CG258	tnp16a	1160	1161	0	0	314	6	0.0031	-8.33352	0.0416101	672219	0	3	0	0.1
CG2580	cgp3045	1034	1024	248	124	534	689	0.3047	-1.71454	5e-08	507443	3	36	0.1	1.8
CG2581	pknG	2468	2469	0	0	845	796	0.0006	-10.7027	0	2982552	0	53	0	1.1
CG2582	ackA	1193	1194	124	0	1821	2258	0.0306	-5.03032	0	686562	1	45	0	1.9
CG2583	pta	1385	1385	372	124	4679	3256	0.0626	-3.99769	0	896197	4	96	0.1	3.5
CG2584	fpr1	1367	1368	0	0	31	1	0.0303	-5.04454	0.0126309	932292	0	5	0	0.2
CG2585	cgp3050	548	537	371	124	1988	1043	0.1636	-2.61176	0	134287	3	41	0.3	3.8
CG2586	cgp3051	1010	1011	54385	124	1866	1309	17.1631	4.10124	4e-08	494908	2	35	0.1	1.7
CG2587	cgp3052	1031	1032	0	124	1867	2512	0.0285	-5.13289	0	507754	1	50	0	2.4
CG2588	cgp3053	401	402	124	247	2633	1209	0.0968	-3.36885	1.4e-07	74989	2	32	0.2	4
CG2589	purT	1226	1227	371	0	2384	2393	0.0779	-3.68223	0	714164	2	65	0.1	2.6
CG259	cgp0293	305	306	0	0	0	0	1	0		46818	0	0	0	0
CG2590	cgp3057	767	768	248	0	1333	1517	0.0873	-3.51787	0	278814	2	44	0.1	2.9
CG2591	tnp8b	896	897	124	124	1944	1483	0.0726	-3.78389	0	386174	2	38	0.1	2.1
CG2592	tnp8a	269	270	0	0	572	971	0.0006	-10.7027	4.376e-05	34425	0	16	0	3
CG2593	cgtS6	1142	1143	0	124	689	1343	0.0615	-4.02327	0	633235	1	36	0	1.6
CG2594	cgtR6	620	621	0	0	1426	1231	0.0004	-11.2877	2.2e-07	185058	0	25	0	2
CG2595	purA	1292	1293	0	247	741	435	0.2107	-2.24674	8e-08	817191	1	31	0	1.2
CG2596	cgp3065	851	852	0	0	1	27	0.0345	-4.85726	0.0787105	362100	0	2	0	0.1
CG2597	cgp3066	266	263	0	0	107	587	0.0014	-9.48036	0.00221353	33532.5	0	8	0	1.5
CG2598	cgp3067	1169	1170	371	248	2100	3768	0.1056	-3.24332	0	645921	4	71	0.2	3
CG2599	fda	1034	1035	0	0	405	0	0.0025	-8.64386	0.0786998	534578	0	2	0	0.1
CG26	cgp0034	530	531	0	0	779	1386	0.0005	-10.9658	0	132219	0	33	0	3.1
CG260	cgpt5012	87	88	0	0	7	1	0.1111	-3.17007	0.0792418	3784	0	2	0	1.1
CG2600	cgp3069	1217	1218	743	1485	9512	6881	0.136	-2.87832	0	695023	11	91	0.5	3.7
CG2601	cgp3070	668	669	0	124	1055	977	0.0615	-4.02327	4e-08	213754	1	34	0.1	2.5
CG2602	pyrE	554	541	0	0	0	1	0.5	-1	0.159103	146070	0	1	0	0.1
CG2603	cgp3072	1340	1341	124	124	2386	2866	0.0474	-4.39897	0	852246	2	73	0.1	2.7
CG2604	sseA1	824	825	248	124	1191	1458	0.1408	-2.82828	6.4e-07	328782	3	33	0.2	2
CG2605	cgp3074	722	723	124	0	1408	1645	0.0409	-4.61176	1e-08	249801	1	34	0.1	2.4
CG2606	cmr	1379	1380	248	124	3640	2010	0.066	-3.92139	0	904648	3	74	0.1	2.7
CG2607	cgp3077	281	282	0	0	60	76	0.0073	-7.09789	0.041541	39339	0	3	0	0.5
CG2608	cgp3078	401	402	124	248	2033	4111	0.0607	-4.04216	3.501e-05	76789.5	3	24	0.4	3
CG2609	clpB	2558	2559	991	1114	8657	10212	0.1116	-3.16359	0	3.04719e+06	14	197	0.3	3.8
CG261	aspT	1280	1281	0	247	168	18	1.3262	0.407298	0.0899696	818561	1	4	0	0.2
CG2610	cgp3080	1349	1350	371	496	2415	2885	0.1637	-2.61087	0	864806	5	75	0.2	2.8
CG2611	cgp3081	119	120	0	0	50	176	0.0044	-7.82828	0.0223009	6960	0	4	0	1.7
CG2612	cgp3082	371	368	0	124	575	970	0.0809	-3.62772	4.57e-06	63855	1	22	0.1	3
CG2613	cgp3083	1022	1023	124	0	1910	1770	0.034	-4.87832	0	496680	1	54	0	2.6
CG2614	cgp3084	1172	1173	0	0	1955	2037	0.0003	-11.7027	0	662158	0	45	0	1.9
CG2615	cgp3085	1043	1044	248	248	2131	2635	0.1043	-3.26119	0	517352	4	58	0.2	2.8
CG2616	cgp3086	1148	1145	124	496	3216	4255	0.0831	-3.58901	0	613250	5	81	0.2	3.5
CG2617	cgp3087	569	570	0	371	1542	2048	0.1036	-3.2709	1e-08	153344	1	33	0.1	2.9
CG2618	arr'	242	239	0	0	945	924	0.0005	-10.9658	2.427e-05	26648.5	0	16	0	3.3
CG2619	arr	185	186	0	0	226	495	0.0014	-9.48036	0.0123604	16833	0	5	0	1.3
CG262	cgp0295	632	633	124	124	1128	905	0.1224	-3.03032	4.02e-06	193078	2	25	0.2	2
CG2620	cgp3090	1127	1128	0	0	0	274	0.0036	-8.11779	0.0786956	635064	0	2	0	0.1
CG2621	cgp3091	809	769	248	248	1169	1255	0.2049	-2.28701	5.74e-06	286090	4	29	0.3	1.9
CG2622	cgp3092	1157	1158	0	124	1657	1380	0.0411	-4.60472	0	650227	1	37	0	1.6
CG2623	cgp3093	800	801	0	248	892	1185	0.1198	-3.0613	8.6e-07	310402	2	28	0.1	1.7
CG2624	cgp3094	245	246	124	0	142	600	0.1682	-2.57175	0.0165561	29521.5	1	7	0.2	1.4
CG2625	cgp3095	1136	1136	496	124	2071	2563	0.134	-2.8997	0	618036	5	54	0.2	2.4
CG2626	ald	1520	1521	248	124	3958	5463	0.0396	-4.65836	0	1102764	3	75	0.1	2.5
CG2627	hspR	440	441	0	0	2	80	0.012	-6.38082	0.0226277	96358.5	0	4	0	0.5
CG2628	dnaJ	1187	1188	248	496	1581	4030	0.1328	-2.91267	0	673089	6	62	0.3	2.6
CG2629	grpE	656	657	0	0	230	359	0.0017	-9.20025	0.00707296	213854	0	6	0	0.5
CG263	dnaZX	2327	2328	0	0	1	144	0.0068	-7.20025	0.0227269	2705136	0	4	0	0.1
CG2630	cgp3100	1856	1857	124	124	148	555	0.3537	-1.4994	6.047e-05	1.70753e+06	2	20	0.1	0.5
CG2631	cgp3101	1400	1401	372	124	3204	2544	0.0864	-3.53282	0	935938	4	70	0.1	2.5
CG2632	cgp3102	560	561	124	248	948	1246	0.1699	-2.55724	2.85e-06	150369	3	28	0.3	2.5
CG2633	cgp3103	1106	1107	619	247	2935	2566	0.1576	-2.66566	3e-08	592310	5	42	0.2	1.9
CG2634	cgp3104	3335	3332	620	496	6038	6627	0.0882	-3.50308	0	5344771	9	135	0.1	2
CG2635	cgp3105	638	639	248	124	1111	2279	0.11	-3.18442	2e-08	193005	3	39	0.2	3.1
CG2636	cgp3106	1487	1484	0	372	2964	2740	0.0654	-3.93457	0	1.04629e+06	3	77	0.1	2.6
CG2637	adhA	1037	1038	124	0	4538	2860	0.0169	-5.88683	0	501374	1	73	0	3.5
CG2638	cgp3108	146	147	0	0	116	154	0.0037	-8.07826	0.0122779	10437	0	5	0	1.7
CG2639	mrr'	101	88	0	0	677	660	0.0007	-10.4804	0.0120156	3652	0	5	0	2.8
CG264	cgp0297	311	312	0	0	608	862	0.0007	-10.4804	1.485e-05	46020	0	17	0	2.7
CG2640	mrr	506	507	124	124	548	1219	0.1408	-2.82828	2.3e-06	122458	2	26	0.2	2.6
CG2641	cgp3111	140	141	0	0	130	929	0.0009	-10.1178	0.00037015	9165	0	12	0	4.3
CG2642	cysZ	929	930	124	0	4374	1947	0.0198	-5.65836	0	410605	1	50	0.1	2.7
CG2643	cysY	725	726	0	0	172	1107	0.0008	-10.2877	0.00043789	259545	0	11	0	0.8
CG2644	cysN	1301	1301	0	0	717	550	0.0008	-10.2877	9e-08	828737	0	27	0	1
CG2645	cysD	914	915	0	124	599	330	0.1344	-2.89539	0.0001303	411754	1	16	0.1	0.9
CG2646	cysH	785	782	124	0	363	214	0.2163	-2.20889	0.00064906	301076	1	13	0.1	0.8
CG2647	cgp3117	248	241	0	0	90	70	0.0062	-7.33352	0.0124315	28438	0	5	0	1
CG2648	cysI	1685	1686	0	0	5	2	0.125	-3	0.0227181	1417926	0	4	0	0.1
CG2649	fpr2	1373	1374	248	0	3994	3555	0.033	-4.92139	0	873928	2	106	0.1	3.9
CG265	recR	656	657	0	0	81	394	0.0021	-8.89539	0.00025238	211882	0	12	0	0.9
CG2650	cgp3120	1364	1365	248	124	1398	1350	0.1357	-2.88151	0	902991	3	45	0.1	1.6
CG2651	cgp3121	206	207	0	0	0	479	0.0021	-8.89539	0.012392	20907	0	5	0	1.2
CG2652	cgp3122	416	417	0	0	176	229	0.0025	-8.64386	0.00225927	85276.5	0	8	0	1
CG2653	cgp3124	368	369	124	0	353	742	0.1141	-3.13163	7.06e-05	65135	1	17	0.1	2.3
CG2654	tctA	1532	1533	248	620	3802	5085	0.0978	-3.35402	0	1109241	7	94	0.2	3.1
CG2655	cgp3126	566	565	124	0	697	625	0.0945	-3.40354	4.274e-05	154813	1	18	0.1	1.6
CG2656	tctC	1004	1005	124	496	3107	3815	0.0897	-3.47875	0	478420	5	60	0.2	3
CG2657	cgp3128	734	731	248	124	1115	983	0.1777	-2.49248	2e-08	254430	3	38	0.2	2.6
CG2658	cgp3129	722	723	0	248	573	653	0.2029	-2.30116	5.711e-05	254870	2	20	0.1	1.4
CG2659	cgp3130	1211	1208	0	248	1734	1410	0.0792	-3.65836	0	703689	2	45	0.1	1.9
CG266	cobQ	752	752	0	0	0	327	0.003	-8.38082	0.0226783	281248	0	4	0	0.3
CG2660	cgp3131	1325	1326	248	124	2984	2987	0.0625	-4	0	837417	3	67	0.1	2.5
CG2661	cgp3132	1739	1740	0	0	2	199	0.005	-7.64386	0.01264	1509450	0	5	0	0.1
CG2662	cgp3133	1028	1029	0	0	1215	2065	0.0003	-11.7027	0	508840	0	42	0	2
CG2663	cgp3134	644	635	247	248	2868	1942	0.1031	-3.27788	7e-08	191476	3	35	0.2	2.8
CG2664	cgp3135	788	789	124	0	586	943	0.0817	-3.61352	1.83e-06	302196	1	24	0.1	1.5
CG2665	cgp3136	818	819	124	0	1461	1321	0.0449	-4.47714	4e-08	323103	1	32	0.1	2
CG2666	iunH1	905	906	0	495	2826	1840	0.1063	-3.23379	0	388265	3	52	0.2	2.9
CG2667	cgp3138	977	978	372	124	5283	488	0.0861	-3.53784	0	459213	4	43	0.2	2.2
CG2668	cgp3139	194	195	0	0	605	0	0.0017	-9.20025	0.00122547	18135	0	9	0	2.3
CG2669	tagA1	590	587	0	494	2785	2201	0.0993	-3.33206	3.97e-06	165547	2	26	0.2	2.2
CG267	cgp0300	1271	1272	0	0	0	9	0.1	-3.32193	0.041612	807084	0	3	0	0.1
CG2670	hmp	1160	1157	0	248	3904	2869	0.0368	-4.76415	0	628282	2	73	0.1	3.2
CG2671	cgp3142	605	606	0	248	1057	1822	0.0865	-3.53116	4.7e-07	175448	2	30	0.2	2.5
CG2672	cgp3143	626	613	124	248	2671	1236	0.0954	-3.38987	0	175049	3	45	0.2	3.7
CG2673	bglG	590	591	0	0	852	336	0.0008	-10.2877	2.2e-07	167253	0	25	0	2.1
CG2674	bglY	362	363	0	124	955	335	0.0968	-3.36885	4.02e-05	62803	1	19	0.1	2.6
CG2675	bglY'	242	243	0	0	896	1572	0.0004	-11.2877	7.497e-05	27823.5	0	14	0	2.9
CG2676	fepC	218	198	0	0	542	482	0.001	-9.96578	0.00022292	18414	0	12	0	3
CG2677	alaT	1313	1314	248	124	2150	1866	0.0929	-3.42818	0	821314	3	67	0.1	2.5
CG2678	tnp2b	1514	1515	0	0	0	0	1	0		1.14761e+06	0	0	0	0
CG2679	cgp3153	1259	1260	372	124	3272	3157	0.0773	-3.69339	0	752276	4	70	0.2	2.8
CG268	cgp0302	1082	1083	495	124	2666	1806	0.1386	-2.851	0	554028	3	64	0.1	3
CG2680	cgp3154	1319	1316	124	496	2303	4376	0.093	-3.42663	0	824539	5	73	0.2	2.8
CG2681	dcd	569	570	0	248	823	598	0.1751	-2.51375	4.8e-07	154778	2	29	0.2	2.5
CG2682	cgpt5059	73	74	0	0	0	0	1	0		2738	0	0	0	0
CG2683	cgp3156	773	774	372	0	1444	1870	0.1125	-3.152	1e-08	285638	3	39	0.2	2.5
CG2684	cgp3157	1691	1692	495	619	4770	6980	0.0949	-3.39745	0	1355450	7	99	0.2	2.9
CG2685	nagA2	1157	1158	124	0	2872	2404	0.0237	-5.39897	0	629392	1	72	0	3.1
CG2686	cgp3159	446	447	124	0	1586	625	0.0565	-4.14561	2e-08	92985	1	33	0.1	3.7
CG2687	cgp3160	203	204	0	0	10	67	0.0128	-6.28771	0.0224856	20400	0	4	0	1
CG2688	cgp3161	3023	3024	124	248	375	489	0.4312	-1.21357	1.6e-07	4525461	3	34	0	0.6
CG2689	cgp3163	1070	1071	0	0	243	348	0.0017	-9.20025	2.987e-05	564952	0	16	0	0.7
CG269	leuA	1850	1851	248	496	7266	8996	0.0458	-4.44851	0	1.5763e+06	6	157	0.2	4.2
CG2690	cgp3164	818	819	0	0	936	1305	0.0004	-11.2877	2e-08	323096	0	31	0	1.9
CG2691	cgp3165	1424	1425	124	124	94	153	1.004	0.00575927	0.00223964	1007488	2	13	0.1	0.5
CG2692	cgp3166	1103	1074	0	124	17	151	0.7396	-0.435183	0.00566776	572446	1	9	0	0.4
CG2693	cgp3167	590	591	0	0	1061	245	0.0008	-10.2877	7e-08	166662	0	27	0	2.3
CG2694	cgp3168	773	774	0	0	172	34	0.0048	-7.70275	0.00401984	296829	0	7	0	0.5
CG2695	pck	1832	1833	744	371	4732	3572	0.1344	-2.89539	0	1582165	8	116	0.2	3.2
CG2696	cgp3170	1013	1014	0	0	2606	3299	0.0002	-12.2877	0	477594	0	74	0	3.6
CG2697	cgp3172	767	767	124	372	2160	1501	0.1357	-2.88151	0	277708	4	48	0.3	3.1
CG2698	cgp3173	686	687	124	124	2426	1587	0.062	-4.01159	0	221924	2	44	0.1	3.2
CG2699	mmpL1	2318	2319	743	620	8983	7324	0.0836	-3.58035	0	2508371	9	170	0.2	3.7
CG27	cgp0035	1238	1239	866	248	3131	2528	0.197	-2.34373	0	723107	6	79	0.2	3.2
CG270	cgp0304	692	693	248	372	2364	2400	0.1303	-2.94009	0	221506	5	59	0.4	4.3
CG2700	cgp3175	1085	1086	124	124	1519	2845	0.057	-4.13289	0	559330	2	58	0.1	2.7
CG2701	cgp3176	365	362	0	124	1012	296	0.0955	-3.38836	0.00021029	62994.5	1	15	0.1	2.1
CG2702	pccB	1550	1551	494	124	4	1	103.167	6.68883	0.499614	1.2028e+06	2	2	0.1	0.1
CG2703	pks	4832	4833	0	620	21	2	25.875	4.69349	0.499373	11678957	5	5	0.1	0.1
CG2704	fadD2	1862	1863	124	124	7	107	2.1652	1.1145	0.0174147	1728873	2	9	0.1	0.2
CG2705	cgp3180	929	930	620	247	5179	5991	0.0777	-3.68594	0	401416	6	78	0.3	4.2
CG2706	cgp3181	500	501	0	0	864	1405	0.0004	-11.2877	4e-08	118486	0	29	0	2.9
CG2707	cgp3182	1973	1974	248	1978	9824	11163	0.1061	-3.2365	0	1781720	5	186	0.1	4.7
CG2708	cgp3185	1373	1374	124	0	2711	3638	0.0197	-5.66566	0	889000	1	81	0	2.9
CG2709	cmt2	1025	1026	0	124	216	148	0.3425	-1.54582	2.681e-05	517114	1	19	0	0.9
CG271	lysC	1265	1266	0	0	0	0	1	0		801378	0	0	0	0
CG2710	cgp3187	2060	2061	5811	6678	373	181	22.5045	4.49214	0.062883	2.13677e+06	40	28	1	0.7
CG2711	ubiA	998	999	0	0	0	10	0.0909	-3.45958	0.158898	498501	0	1	0	0.1
CG2712	cgp3190	506	492	124	247	56	6	5.9048	2.56189	0.208657	120544	2	4	0.2	0.4
CG2713	glfT	1970	1971	0	124	0	208	0.5981	-0.741541	0.281901	1941435	1	2	0	0.1
CG2714	cgp3192	1400	1369	124	248	7572	5165	0.0293	-5.09296	0	857755	3	120	0.1	4.4
CG2715	cgp3193	479	480	0	248	1735	2070	0.0654	-3.93457	0	106331	2	41	0.2	4.3
CG2716	cgp3194	593	594	124	0	263	318	0.2148	-2.21893	0.00012763	171970	1	16	0.1	1.3
CG2717	cgp3195	1790	1791	1115	1239	8441	7840	0.1446	-2.78986	0	1510287	17	124	0.5	3.5
CG2718	glf	1205	1206	0	0	93	169	0.0038	-8.03978	0.0227054	724806	0	4	0	0.2
CG2719	psp5	2120	2121	248	372	8995	6041	0.0413	-4.59771	0	2086206	5	164	0.1	3.9
CG272	asd	1034	1035	0	0	5	1	0.1429	-2.80692	0.0786998	534578	0	2	0	0.1
CG2720	glpK	1529	1530	124	0	4374	3200	0.0165	-5.92139	0	1.11615e+06	1	73	0	2.4
CG2721	cgp3199	836	833	248	371	1251	1640	0.2144	-2.22162	3.62e-06	336156	4	31	0.2	1.9
CG2722	cgp3200	887	888	0	0	1	0	0.5	-1	0.158928	393828	0	1	0	0.1
CG2723	serS	1268	1269	0	0	87	0	0.0114	-6.45482	0.158846	804546	0	1	0	0
CG2724	farR	800	801	0	371	2619	1964	0.0812	-3.62238	0	299616	2	57	0.1	3.6
CG2725	cgp3203	1022	1019	248	372	1850	2023	0.1603	-2.64115	0	496328	5	50	0.2	2.5
CG2726	cgp3204	344	345	0	0	707	1337	0.0005	-10.9658	9.6e-07	55717.5	0	22	0	3.2
CG2727	cgp3206	671	672	248	124	1966	1503	0.1075	-3.21759	0	210382	3	49	0.2	3.6
CG2728	cgp3207	947	948	124	0	2352	1766	0.0303	-5.04454	0	423299	1	57	0.1	3
CG2729	cgp3208	1139	1140	124	124	1872	3604	0.0455	-4.45799	0	614493	2	66	0.1	2.9
CG273	cgp0308	1436	1437	0	248	954	1892	0.0875	-3.51457	0	1.00521e+06	2	40	0.1	1.4
CG2730	cgp3209	731	728	372	248	1503	2455	0.1569	-2.67208	0	250470	5	45	0.3	3.1
CG2731	cgp3210	1244	1245	248	372	4389	3943	0.0745	-3.74662	0	732750	5	74	0.2	3
CG2732	cgp3211	872	873	248	0	1753	1287	0.0819	-3.60999	0	363197	2	44	0.1	2.5
CG2733	cgp3212	329	330	248	0	800	390	0.2091	-2.25774	8.893e-05	51658	2	19	0.3	2.9
CG2734	cgp3213	1286	1287	495	124	2115	2772	0.1268	-2.97937	0	777462	4	83	0.2	3.2
CG2735	cgp3214	914	915	124	494	1163	2500	0.1689	-2.56576	0	395778	2	54	0.1	3
CG2736	glpQ1	761	745	0	0	1468	2691	0.0002	-12.2877	0	264848	0	35	0	2.3
CG2737	gntP	1391	1392	496	124	4328	2339	0.0931	-3.42508	0	918815	5	79	0.2	2.8
CG2738	cgp3218	1859	1860	124	0	4500	3274	0.0161	-5.9568	0	1.64984e+06	1	87	0	2.3
CG2739	ldh	944	945	0	372	4354	4874	0.0404	-4.6295	0	413952	3	75	0.2	4
CG274	cgp0309	581	582	0	0	139	8	0.0068	-7.20025	0.0415881	168489	0	3	0	0.3
CG2740	cgp3220	1778	1779	372	124	4607	4432	0.055	-4.18442	0	1492687	4	107	0.1	3
CG2741	cgp3221	638	639	372	124	1774	3660	0.0914	-3.45166	0	191095	4	45	0.3	3.5
CG2742	cgp3223	545	546	124	0	1176	1157	0.0536	-4.22162	3.3e-07	141966	1	28	0.1	2.6
CG2743	lldR	668	669	248	372	1623	831	0.253	-1.98279	1.68e-05	215790	5	29	0.4	2.2
CG2744	cgp3225	788	789	248	124	839	1150	0.1874	-2.41581	1e-08	297099	3	39	0.2	2.5
CG2745	cgp3226	1301	1302	372	124	4603	3721	0.0597	-4.06613	0	794945	4	87	0.2	3.3
CG2746	lldD	1262	1263	619	0	3311	2247	0.1115	-3.16488	0	752212	4	76	0.2	3
CG2747	cgp3230	314	315	0	0	253	353	0.0016	-9.28771	0.00041563	47880	0	11	0	1.7
CG2748	cgp3231	170	34	0	0	0	0	1	0		578	0	0	0	0
CG2749	cgp4026	395	396	0	248	474	623	0.2268	-2.14051	0.00127303	76040	2	14	0.3	1.8
CG275	katA	1550	1551	248	496	4674	3518	0.0909	-3.45958	0	1.11926e+06	6	114	0.2	3.7
CG2750	cgp3232	1619	1620	496	248	6678	4755	0.0652	-3.93898	0	1227312	6	113	0.2	3.5
CG2751	cgp3233	548	549	0	248	1972	984	0.0842	-3.57004	7.8e-07	143572	2	28	0.2	2.6
CG2752	cgp3234	404	405	124	124	672	1118	0.139	-2.84684	3.139e-05	78178	2	22	0.2	2.7
CG2753	msrA	653	654	124	372	1495	1631	0.1589	-2.65381	4.3e-07	204080	4	34	0.3	2.6
CG2754	sod	602	603	0	0	398	324	0.0014	-9.48036	8.446e-05	177584	0	14	0	1.2
CG2755	cgp3238	116	117	0	0	0	52	0.0189	-5.72547	0.0790945	6727.5	0	2	0	0.9
CG2756	lysR2	926	927	0	0	1549	2093	0.0003	-11.7027	0	413442	0	36	0	1.9
CG2757	cgp3240	1238	1239	124	0	1794	2256	0.0309	-5.01625	0	737220	1	51	0	2.1
CG2758	cgp3242	1613	1614	248	124	3015	2766	0.0645	-3.95456	0	1258158	3	58	0.1	1.8
CG2759	cgp3243	1523	1524	620	248	3901	5327	0.0942	-3.40813	0	1086039	7	108	0.2	3.5
CG276	cgp0311	293	294	0	124	996	278	0.098	-3.35107	0.00035305	41312	1	14	0.2	2.4
CG2760	cgp3244	635	636	248	124	933	1383	0.161	-2.63487	4e-08	191787	3	36	0.2	2.8
CG2761	cgp3245	1466	1467	248	124	3891	6195	0.037	-4.75633	0	1009365	3	95	0.1	3.2
CG2762	cgp3246	458	459	0	124	745	763	0.0828	-3.59423	3.2e-07	99384	1	27	0.1	2.9
CG2763	cgtR11	638	639	0	0	351	232	0.0017	-9.20025	8.484e-05	199688	0	14	0	1.1
CG2764	cgtS11	1334	1333	0	0	1334	1264	0.0004	-11.2877	0	860452	0	43	0	1.6
CG2765	cgp3249	551	552	248	124	1449	864	0.1612	-2.63308	4.65e-06	145738	3	27	0.3	2.4
CG2766	cgp3250	152	153	0	0	1	293	0.0034	-8.20025	0.0122933	11322	0	6	0	2
CG2767	cgp3251	824	825	372	248	2187	1548	0.1662	-2.58901	7e-08	325935	5	43	0.3	2.6
CG2768	cgp3252	1268	1195	248	124	1145	1321	0.1512	-2.72547	0	691358	3	41	0.1	1.7
CG2769	mcbR	641	642	0	0	0	24	0.04	-4.64386	0.0787305	205440	0	2	0	0.2
CG277	lrp	455	456	248	0	911	1265	0.1144	-3.12784	1.081e-05	99189	2	23	0.2	2.5
CG2770	cgp3254	263	264	0	0	218	457	0.0015	-9.38082	0.00013324	33132	0	13	0	2.5
CG2771	uspA3	905	906	124	124	2034	1517	0.0701	-3.83444	0	388704	2	51	0.1	2.8
CG2772	cgp3256	989	990	0	124	1800	1709	0.0356	-4.81198	0	470753	1	40	0.1	2
CG2773	cgp3257	140	141	0	0	160	95	0.0039	-8.00231	0.0223677	9658.5	0	4	0	1.4
CG2774	rluC2	1016	997	124	0	1375	666	0.0612	-4.03032	0	478573	1	38	0.1	1.9
CG2775	cgpr5111	119	120	0	0	0	0	1	0		7200	0	0	0	0
CG2776	cgpr5135	3085	3086	0	0	0	0	1	0		4761698	0	0	0	0
CG2777	cgpr5123	1523	1524	0	0	0	0	1	0		1161288	0	0	0	0
CG2778	cgp3261	365	366	0	247	688	1121	0.137	-2.86775	1e-07	61867.5	1	30	0.1	4.1
CG2779	cgp3263	1418	1419	248	0	1999	1310	0.0752	-3.73312	0	965674	2	61	0.1	2.1
CG278	brnF	755	756	0	0	785	1390	0.0005	-10.9658	1.4e-07	275940	0	26	0	1.7
CG2780	cgp3264	875	876	0	248	1877	2306	0.0595	-4.07097	0	359198	2	60	0.1	3.4
CG2781	tnp5c	1238	1239	124	248	2862	1616	0.0833	-3.58554	1e-08	745281	3	39	0.1	1.6
CG2782	cgp3267	920	738	124	124	5293	4315	0.0259	-5.2709	0	246523	2	74	0.1	5
CG2783	cgp3268	251	252	0	0	505	509	0.001	-9.96578	0.00040608	30366	0	11	0	2.2
CG2784	cgp3269	254	255	124	0	952	782	0.072	-3.79586	0.0001125	30603	1	16	0.2	3.1
CG2785	cgp3270	206	206	0	0	1173	1438	0.0004	-11.2877	0.0001274	19879	0	14	0	3.4
CG2786	cgp3271	773	774	0	124	2334	2648	0.0251	-5.31617	0	278270	1	58	0.1	3.7
CG2787	cgp3272	722	723	124	0	2875	3509	0.0196	-5.673	0	237520	1	67	0.1	4.6
CG2788	cgp3273	296	297	247	124	2678	1266	0.0943	-3.4066	0.00014576	41736.5	2	18	0.3	3
CG2789	cgp4011	173	174	124	124	221	482	0.3537	-1.4994	0.00209483	14192	2	15	0.6	4.3
CG279	brnE	326	323	0	0	441	1291	0.0006	-10.7027	0.00041658	50388	0	11	0	1.7
CG2790	cgp3274	218	137	124	0	447	370	0.1528	-2.71028	0.0160359	8974	1	7	0.4	2.6
CG2791	fdxA	323	324	124	0	1291	1178	0.0506	-4.30472	8.2e-07	48604.5	1	26	0.2	4
CG2792	cgp3277	335	336	124	248	1178	1371	0.1463	-2.773	1.98e-05	52929	3	25	0.4	3.7
CG2793	tnp20a	113	114	0	0	182	468	0.0015	-9.38082	0.00205672	6042	0	8	0	3.5
CG2794	cgp3279	128	129	0	0	366	725	0.0009	-10.1178	0.00036288	7611	0	11	0	4.3
CG2795	cgp3280	662	663	372	248	3591	3053	0.0935	-3.41889	0	199977	5	67	0.4	5.1
CG2796	cgp3281	2219	2220	868	620	7245	7968	0.0979	-3.35255	0	2271684	12	192	0.3	4.3
CG2797	cgp3282	332	208	0	0	1857	2060	0.0003	-11.7027	1.34e-06	19448	0	24	0	5.8
CG2798	cgp3283	173	174	0	0	1090	338	0.0007	-10.4804	0.00012268	14007	0	13	0	3.7
[truncated: 938 more rows]

## Sheet: Cog_2_results_genes
Loci	Name	length	TA sites	Cog_2 F reads	Cog_2 R reads	nophage_2 F reads	nophage_2 R reads	Ratio (Mut/WT)	log2	Mann Pvalue	Mann Statistic	Cog_2 Unique Insertions	nophage_2 Unique Insertions	Cog_2 Diversity	nophage_2 Diversity
CG1	dnaA	1574	1576	0	0	49	1	0.0196		0.0126365	1237948	0	5	0	0.2
CG10	ssuR	1067	1068	0	0	2612	2887	0.0002	-12.2877	0	540942	0	58	0	2.7
CG100	ureF	680	680	0	0	1882	710	0.0004	-11.2877	0	219640	0	35	0	2.6
CG1000	cgp1103	2498	2499	312	0	5593	7500	0.0239	-5.38685	0	2952629	1	139	0	2.8
CG1001	cgp1104	1280	1281	0	0	3526	2151	0.0002	-12.2877	0	773724	0	74	0	2.9
CG1002	lysI	1505	1506	0	0	2543	2588	0.0002	-12.2877	0	1082061	0	70	0	2.3
CG1003	cgp1106	212	213	0	0	820	98	0.0011	-9.82828	0.00012826	21300	0	13	0	3.1
CG1004	cgp1107	587	561	0	0	715	1028	0.0006	-10.7027	1.1e-06	151190	0	22	0	2
CG1005	cgp1108	371	372	0	0	715	846	0.0006	-10.7027	1.71e-06	65286	0	22	0	3
CG1006	cgp1109	380	381	0	0	1315	2474	0.0003	-11.7027	0	65151	0	39	0	5.1
CG1007	cgp1110	764	765	156	156	2914	2882	0.054	-4.2109	0	273514	2	52	0.1	3.4
CG1008	eno	1277	1278	0	0	0	82	0.012	-6.38082	0.0416121	814725	0	3	0	0.1
CG1009	cgp1112	542	543	0	0	951	557	0.0007	-10.4804	0.00014445	143895	0	13	0	1.2
CG101	ureG	617	618	0	0	1482	1852	0.0003	-11.7027	0	180456	0	34	0	2.8
CG1010	cgp1113	554	555	0	0	0	193	0.0052	-7.58727	0.159092	153735	0	1	0	0.1
CG1011	ppx2	965	965	0	0	1370	2562	0.0003	-11.7027	0	441970	0	49	0	2.5
CG1012	cgpt5024	76	77	0	0	0	0	1	0		2964.5	0	0	0	0
CG1013	tdcB	932	933	0	0	1370	2454	0.0003	-11.7027	0	413319	0	49	0	2.6
CG1014	cgp1117	197	198	0	0	122	0	0.0081	-6.94786	0.0415022	19305	0	3	0	0.8
CG1015	cgp1118	332	333	0	0	903	1162	0.0005	-10.9658	9.5e-07	51781.5	0	22	0	3.3
CG1016	cgp1119	191	192	0	0	197	41	0.0042	-7.89539	0.00216836	17664	0	8	0	2.1
CG1017	ripA	995	996	0	0	2527	2099	0.0002	-12.2877	0	477084	0	38	0	1.9
CG1018	cgp1121	818	819	0	0	1220	0	0.0008	-10.2877	3e-08	323505	0	29	0	1.8
CG1019	cgp1122	452	453	0	0	870	367	0.0008	-10.2877	4.759e-05	99207	0	15	0	1.7
CG102	ureD	851	852	0	0	2978	2008	0.0002	-12.2877	0	342504	0	48	0	2.8
CG1020	greA	524	525	0	0	6	253	0.0038	-8.03978	0.00043126	134925	0	11	0	1
CG1021	cgp1124	98	99	0	0	187	273	0.0022	-8.82828	0.0222058	4702.5	0	4	0	2
CG1022	cgp1125	338	302	0	0	2	0	0.3333	-1.58511	0.159458	45451	0	1	0	0.2
CG1023	mca	884	885	0	0	3166	2797	0.0002	-12.2877	0	366390	0	59	0	3.3
CG1024	cgp1128	320	321	0	0	349	109	0.0022	-8.82828	0.022582	50878.5	0	4	0	0.6
CG1025	aorR	77	78	0	0	0	0	1	0		3042	0	0	0	0
CG1026	aroF	1100	1101	156	0	2908	3407	0.0249	-5.32771	0	571438	1	65	0	3
CG1027	uppS1	770	771	0	0	1394	1678	0.0003	-11.7027	0	281800	0	41	0	2.7
CG1028	cgp1131	521	522	0	0	2222	2197	0.0002	-12.2877	0	125541	0	41	0	3.9
CG1029	coaA	971	972	0	0	1	26	0.0357	-4.80793	0.0126134	469962	0	5	0	0.3
CG103	cgp0120	779	776	0	0	3183	1892	0.0002	-12.2877	0	284404	0	43	0	2.8
CG1030	glyA	1304	1305	0	0	1	1	0.3333	-1.58511	0.0786894	850208	0	2	0	0.1
CG1031	pab	1862	1859	0	623	2931	3528	0.0966	-3.37183	0	1653620	1	81	0	2.2
CG1032	cgp1135	725	726	156	0	1691	2321	0.0391	-4.67669	1e-08	251568	1	35	0.1	2.4
CG1033	cgp1136	389	390	0	0	217	825	0.001	-9.96578	5.19e-06	72345	0	19	0	2.4
CG1034	cgp1137	674	675	0	0	296	160	0.0022	-8.82828	8.518e-05	223088	0	14	0	1
CG1035	cgp1138	539	536	0	0	616	602	0.0008	-10.2877	3.22e-06	138288	0	20	0	1.9
CG1036	cgp1139	881	882	0	0	1334	891	0.0004	-11.2877	0	373968	0	35	0	2
CG1037	cgp1140	653	650	0	0	2146	2083	0.0002	-12.2877	0	196950	0	45	0	3.5
CG1038	cgp1141	758	748	0	0	2478	2326	0.0002	-12.2877	0	258808	0	56	0	3.7
CG1039	cgp1142	1310	1311	0	0	4947	5030	0.0001	-13.2877	0	798399	0	93	0	3.5
CG104	cgp0121	1154	1155	0	0	1335	1866	0.0003	-11.7027	0	640448	0	46	0	2
CG1040	cgp1143	653	654	0	0	347	1289	0.0006	-10.7027	3e-08	204375	0	29	0	2.2
CG1041	cgp1144	1244	1245	0	0	3602	2606	0.0002	-12.2877	0	737662	0	63	0	2.5
CG1042	fum	1409	1410	0	0	87	419	0.002	-8.96578	6.14e-06	980655	0	19	0	0.7
CG1043	ssuI	491	492	0	0	1037	574	0.0006	-10.7027	2.1e-07	114882	0	26	0	2.6
CG1044	cgp1148	263	264	0	0	458	278	0.0014	-9.48036	0.00125715	33660	0	10	0	1.9
CG1045	cgp1149	425	426	0	312	826	2017	0.1101	-3.18311	4.205e-05	87125	1	19	0.1	2.2
CG1046	cgp1150	566	567	156	0	2585	1643	0.0371	-4.75244	0	148002	1	46	0.1	4.1
CG1047	seuA	1463	1464	0	156	5456	4444	0.0159	-5.97483	0	1.00286e+06	1	98	0	3.3
CG1048	seuB	1082	1075	0	0	1106	3124	0.0002	-12.2877	0	552550	0	48	0	2.2
CG1049	seuC	1199	1200	0	0	2402	3725	0.0002	-12.2877	0	684000	0	61	0	2.5
CG105	cgp0122	2777	2778	0	156	7878	6207	0.0111	-6.4933	0	3635062	1	164	0	3
CG1050	ssuD2	1178	1179	0	0	3226	3648	0.0001	-13.2877	0	650218	0	76	0	3.2
CG1051	fbp	1007	1008	0	156	3914	4170	0.0194	-5.6878	0	471258	1	74	0	3.7
CG1052	cgp1158	572	573	0	0	966	836	0.0006	-10.7027	9.6e-06	159008	0	18	0	1.6
CG1053	cgp1159	1904	1905	312	156	3822	3747	0.062	-4.01159	0	1.72506e+06	2	98	0.1	2.6
CG1054	cgp1160	227	228	0	0	856	1095	0.0005	-10.9658	7.9e-07	23484	0	22	0	4.8
CG1055	xseB	245	246	0	0	261	850	0.0009	-10.1178	0.000711	29028	0	11	0	2.2
CG1056	xseA	1253	1254	623	0	3045	3355	0.0975	-3.35845	0	734884	1	84	0	3.3
CG1057	ispH	977	978	0	0	3	0	0.25	-2	0.0787027	477264	0	2	0	0.1
CG1058	cgp1165	830	831	156	156	2101	1208	0.0946	-3.40202	6e-08	332415	2	33	0.1	2
CG1059	cgp1166	1481	1482	0	0	3467	5183	0.0001	-13.2877	0	1038141	0	82	0	2.8
CG106	htpG	1826	1827	0	7634	4047	5141	0.8309	-0.267253	0	1574926	1	107	0	2.9
CG1060	cgp1167	182	183	0	0	636	1719	0.0004	-11.2877	7.06e-06	15097.5	0	18	0	4.9
CG1061	metP	1691	1692	0	156	4398	3798	0.0192	-5.70275	0	1344328	1	105	0	3.1
CG1062	cmt5	1235	1236	0	156	2982	6766	0.0161	-5.9568	0	702693	1	103	0	4.2
CG1063	cgp1171	1085	1086	0	0	327	166	0.002	-8.96578	1.751e-05	580467	0	17	0	0.8
CG1064	cgp1172	281	282	0	0	213	421	0.0016	-9.28771	0.00222183	38634	0	8	0	1.4
CG1065	cgp1173	299	300	0	0	744	1406	0.0005	-10.9658	2.564e-05	42600	0	17	0	2.8
CG1066	arcB	833	830	0	0	2277	1793	0.0002	-12.2877	0	327020	0	42	0	2.5
CG1067	cgp1175	503	504	0	0	253	1220	0.0007	-10.4804	6.2e-07	121212	0	23	0	2.3
CG1068	cgp1176	557	558	0	0	1800	1271	0.0003	-11.7027	0	145359	0	38	0	3.4
CG1069	tnp9a	1208	1209	0	0	4423	3953	0.0001	-13.2877	0	686108	0	74	0	3.1
CG107	amn	1409	1410	0	0	3557	2347	0.0002	-12.2877	0	941175	0	75	0	2.7
CG1070	cgp1179	3056	3057	0	0	6562	5860	0.0001	-13.2877	0	4466277	0	138	0	2.3
CG1071	cgp1180	1469	1466	0	0	3085	3349	0.0002	-12.2877	0	1024734	0	68	0	2.3
CG1072	cgp1182	221	222	0	0	353	88	0.0023	-8.76415	0.012411	24087	0	5	0	1.1
CG1073	cgp1183	335	336	0	0	715	1820	0.0004	-11.2877	2.624e-05	53760	0	16	0	2.4
CG1074	tnp10c	293	290	0	0	1716	514	0.0004	-11.2877	8.36e-06	39440	0	18	0	3.1
CG1075	tnp10b	377	378	0	0	611	90	0.0014	-9.48036	0.00024269	69174	0	12	0	1.6
CG1076	Name=tnp10a'	146	147	0	0	197	105	0.0033	-8.24332	0.0223833	10510.5	0	4	0	1.4
CG1077	cgp1189	188	189	0	0	0	85	0.0116	-6.42973	0.159939	17766	0	1	0	0.3
CG1078	cgp1190	368	369	0	0	142	41	0.0054	-7.53282	0.00395932	66789	0	7	0	0.9
CG1079	cgp1191	500	501	0	0	899	1041	0.0005	-10.9658	4e-08	118486	0	29	0	2.9
CG108	cgp0126	581	582	0	0	913	1193	0.0005	-10.9658	2.2e-07	162087	0	25	0	2.1
CG1080	cgp1192	803	804	0	0	1477	1146	0.0004	-11.2877	0	306726	0	41	0	2.5
CG1081	cgp1193	323	324	0	0	693	814	0.0007	-10.4804	4.95e-06	49410	0	19	0	2.9
CG1082	cgp1194	656	657	0	0	1683	1437	0.0003	-11.7027	1e-08	205312	0	33	0	2.5
CG1083	cgp1195	1697	1698	0	0	4115	4171	0.0001	-13.2877	0	1368588	0	90	0	2.7
CG1084	cgp1197	599	600	0	0	649	863	0.0007	-10.4804	4e-08	171600	0	28	0	2.3
CG1085	cgp1198	500	497	156	0	845	737	0.0992	-3.33352	2.472e-05	119037	1	21	0.1	2.1
CG1086	cgp1199	335	336	0	0	730	578	0.0008	-10.2877	7.925e-05	54096	0	14	0	2.1
CG1087	cgp1200	122	123	0	0	58	19	0.0128	-6.28771	0.0414225	7380	0	3	0	1.2
CG1088	cgp1201	155	149	0	0	216	801	0.001	-9.96578	0.00037437	10281	0	11	0	3.7
CG1089	cgp1202	1958	1959	156	0	3402	4160	0.0208	-5.58727	0	1828757	1	94	0	2.4
CG109	cgp0127	554	555	0	0	2394	751	0.0003	-11.7027	0	143745	0	38	0	3.4
CG1090	cgp1203	1364	1365	0	0	2731	2896	0.0002	-12.2877	0	883155	0	71	0	2.6
CG1091	cgp1204	689	690	0	0	1235	1404	0.0004	-11.2877	1.3e-07	229080	0	27	0	2
CG1092	cgp1205	707	704	0	0	1023	669	0.0006	-10.7027	2.3e-07	239008	0	25	0	1.8
CG1093	cgp1206	764	765	156	0	2435	2960	0.0291	-5.10284	0	276556	1	45	0.1	2.9
CG1094	cgp1207	1643	1644	0	156	3610	3829	0.0211	-5.56661	0	1.2807e+06	1	87	0	2.6
CG1095	cgp1208	398	385	0	0	1327	1954	0.0003	-11.7027	6e-08	68915	0	27	0	3.5
CG1096	cgp1209	344	345	0	0	1067	1068	0.0005	-10.9658	1.518e-05	56580	0	18	0	2.6
CG1097	cgp1210	92	93	0	0	17	510	0.0019	-9.03978	0.0221708	4138.5	0	4	0	2.2
CG1098	cgp1211	476	477	0	0	590	748	0.0007	-10.4804	6.1e-07	108279	0	23	0	2.4
CG1099	cgp1212	1220	1221	0	0	3033	3909	0.0001	-13.2877	0	702075	0	71	0	2.9
CG11	cgp0013	263	264	0	0	1117	621	0.0006	-10.7027	1.51e-06	32076	0	21	0	4
CG110	cgp0128	551	552	0	0	1155	2185	0.0003	-11.7027	1e-08	143796	0	31	0	2.8
CG1100	tnp1a	1310	1311	0	0	0	0	1	0		859360	0	0	0	0
CG1101	cgp1214	1076	1076	0	0	2529	3417	0.0002	-12.2877	0	544456	0	65	0	3
CG1102	nadC	839	840	0	623	1981	1842	0.1632	-2.61529	0	333504	1	48	0.1	2.9
CG1103	nadA	1286	1287	0	0	5261	4298	0.0001	-13.2877	0	772200	0	89	0	3.5
CG1104	cgp1218	644	645	0	0	1728	2533	0.0002	-12.2877	0	196725	0	37	0	2.9
CG1105	cgp1219	923	924	0	0	4517	1935	0.0002	-12.2877	0	394548	0	71	0	3.8
CG1106	cgp1220	602	603	0	0	418	702	0.0009	-10.1178	1.12e-06	175172	0	22	0	1.8
CG1107	cgp1221	344	345	0	0	1233	1044	0.0004	-11.2877	1.67e-06	55890	0	22	0	3.2
CG1108	lplA	1058	1059	0	0	3132	5199	0.0001	-13.2877	0	525794	0	68	0	3.2
CG1109	cgp1224	413	414	0	0	445	662	0.0009	-10.1178	5.26e-06	81765	0	19	0	2.3
CG111	putA	3458	3459	312	156	8144	9151	0.0271	-5.20556	0	5.6677e+06	2	187	0	2.7
CG1110	pcaK	1295	1296	156	467	4262	2832	0.0879	-3.50799	0	789974	2	81	0.1	3.1
CG1111	cgp1226	1187	1188	0	0	4483	2547	0.0001	-13.2877	0	659934	0	79	0	3.3
CG1112	cgp1227	605	606	0	0	1257	1292	0.0004	-11.2877	0	173619	0	33	0	2.7
CG1113	cgp1228	1340	1337	0	0	2242	2897	0.0002	-12.2877	0	857686	0	54	0	2
CG1114	cgp1229	755	752	0	0	823	1668	0.0004	-11.2877	0	267712	0	40	0	2.7
CG1115	cgp1230	533	534	0	0	1183	901	0.0005	-10.9658	1.635e-05	138039	0	17	0	1.6
CG1116	chaA	1052	1053	0	0	2544	2776	0.0002	-12.2877	0	523868	0	60	0	2.8
CG1117	cgp1232	704	705	0	0	516	2172	0.0004	-11.2877	0	236528	0	34	0	2.4
CG1118	cgp1233	725	692	0	0	1466	2707	0.0002	-12.2877	0	225938	0	41	0	3
CG1119	cgp1234	2342	2343	0	0	3047	5814	0.0001	-13.2877	0	2617131	0	109	0	2.3
CG112	cgp0131	935	936	0	0	2938	3164	0.0002	-12.2877	0	407160	0	67	0	3.6
CG1120	tpx	497	498	0	0	1145	1222	0.0004	-11.2877	2e-08	116781	0	29	0	2.9
CG1121	cgp1237	1778	1775	0	0	4362	3806	0.0001	-13.2877	0	1498100	0	88	0	2.5
CG1122	cgp1238	956	957	0	0	2489	3558	0.0002	-12.2877	0	432086	0	55	0	2.9
CG1123	cgp1239	902	903	0	0	4270	3061	0.0001	-13.2877	0	384226	0	53	0	2.9
CG1124	cgp1240	368	369	0	156	1419	388	0.0868	-3.52616	4.55e-06	64212	1	22	0.1	3
CG1125	cgp4004	260	247	0	0	347	282	0.0016	-9.28771	0.00220554	29516.5	0	8	0	1.6
CG1126	cgp1241	263	125	0	0	333	70	0.0025	-8.64386	0.00673822	7437.5	0	7	0	2.8
CG1127	cgp1242	389	390	0	0	1153	1022	0.0005	-10.9658	1.1e-07	70980	0	27	0	3.5
CG1128	cgp1243	836	837	0	156	1968	3864	0.0269	-5.21625	0	322683	1	70	0.1	4.2
CG1129	cgp1244	347	348	0	0	526	161	0.0015	-9.38082	0.00041928	58638	0	11	0	1.6
CG113	cgp0133	1523	1524	0	0	3268	3212	0.0002	-12.2877	0	1104900	0	75	0	2.5
CG1130	cgp1245	1202	1203	0	156	3844	4326	0.0192	-5.70275	0	683926	1	67	0	2.8
CG1131	cgp1246	539	540	156	624	839	1015	0.421	-1.24811	7.3e-07	138021	4	33	0.4	3.1
CG1132	cgp1247	716	717	156	0	653	1970	0.0598	-4.06371	0	244866	1	36	0.1	2.5
CG1133	cgp1248	1922	1923	0	0	48	6	0.0182	-5.77992	0.00405303	1842234	0	7	0	0.2
CG1134	cgp1249	1502	1489	156	0	864	104	0.162	-2.62593	0.00192529	1101120	1	11	0	0.4
CG1135	mshB	872	873	0	156	3863	2692	0.0239	-5.38685	0	346610	1	82	0.1	4.7
CG1136	cgp1251	413	414	0	0	1715	1306	0.0003	-11.7027	1.76e-06	81351	0	21	0	2.5
CG1137	fdxC	317	318	0	0	103	297	0.0025	-8.64386	0.00698824	49608	0	6	0	0.9
CG1138	dapC	1103	1104	0	0	12	0	0.0769	-3.70087	0.158875	608856	0	1	0	0
CG1139	cgp1254	590	591	0	0	775	255	0.001	-9.96578	5.62e-06	169026	0	19	0	1.6
CG114	cgp0134	1388	1389	0	0	1741	2664	0.0002	-12.2877	0	923685	0	59	0	2.1
CG1140	cgp1255	1187	1188	0	0	834	2069	0.0003	-11.7027	4.3e-07	691416	0	25	0	1.1
CG1141	dapD	893	890	0	0	2450	2776	0.0002	-12.2877	0	373355	0	52	0	2.9
CG1142	cgp1257	1391	1392	0	0	2606	2932	0.0002	-12.2877	0	921504	0	68	0	2.4
CG1143	dapD2	899	900	156	0	4284	3077	0.0213	-5.553	0	369926	1	80	0.1	4.4
CG1144	dapE	1109	1110	0	0	4085	2723	0.0001	-13.2877	0	584415	0	58	0	2.6
CG1145	cgp1261	770	771	0	0	3118	2245	0.0002	-12.2877	0	277174	0	53	0	3.4
CG1146	folP2	833	834	0	156	2183	3124	0.0296	-5.07826	0	326940	1	51	0.1	3.1
CG1147	cgp1263	716	717	156	0	1060	979	0.077	-3.699	1e-08	245586	1	33	0.1	2.3
CG1148	cgp1264	308	309	0	0	2	550	0.0018	-9.11779	0.00127036	46350	0	9	0	1.5
CG1149	cgp1265	167	168	0	0	235	173	0.0024	-8.70275	0.00684304	13608	0	6	0	1.8
CG115	cgp0135	368	369	0	0	764	575	0.0007	-10.4804	0.00024214	65866.5	0	13	0	1.8
CG1150	rlmA	866	867	0	0	3130	2105	0.0002	-12.2877	0	345066	0	72	0	4.2
CG1151	cgp1267	1496	1497	0	0	2848	4661	0.0001	-13.2877	0	1046403	0	99	0	3.3
CG1152	glgA	1172	1173	0	0	2809	5133	0.0001	-13.2877	0	635766	0	89	0	3.8
CG1153	glgC	1217	1218	0	0	6312	4585	0.0001	-13.2877	0	690606	0	87	0	3.6
CG1154	cgp1270	641	642	156	0	296	337	0.2476	-2.01392	0.00012853	201274	1	16	0.1	1.2
CG1155	sigE	641	642	0	0	6	37	0.0227	-5.46116	0.0415922	205119	0	3	0	0.2
CG1156	cgp1272	494	495	0	0	169	37	0.0048	-7.70275	0.00398868	120780	0	7	0	0.7
CG1157	cgp1273	470	471	0	0	0	93	0.0106	-6.55979	0.15917	110685	0	1	0	0.1
CG1158	mrp	1127	1128	0	0	125	68	0.0052	-7.58727	0.0416095	634500	0	3	0	0.1
CG1159	cgp1275	581	582	0	0	1599	1493	0.0003	-11.7027	0	160050	0	32	0	2.7
CG116	cgp0136	317	318	0	0	672	594	0.0008	-10.2877	1.491e-05	47859	0	18	0	2.8
CG1160	mgtE1	1292	1285	156	0	2020	2056	0.0385	-4.699	0	790934	1	56	0	2.2
CG1161	cgp1277	497	498	0	0	2751	610	0.0003	-11.7027	2.1e-07	117777	0	26	0	2.6
CG1162	cgp1278	668	669	156	0	2138	1023	0.0497	-4.33061	1e-08	213087	1	33	0.1	2.5
CG1163	cgp1279	533	525	0	0	1631	1098	0.0004	-11.2877	1e-08	129675	0	31	0	3
CG1164	odhA	3665	3666	0	0	11	339	0.0028	-8.48036	0.00232972	6705114	0	8	0	0.1
CG1165	cgp1281	3743	3744	0	0	12688	11343	0	#NUM!	0	6542640	0	254	0	3.4
CG1166	cgp1282	719	720	0	0	1497	1622	0.0003	-11.7027	1e-08	247680	0	32	0	2.2
CG1167	aroE2	806	807	0	0	4795	4737	0.0001	-13.2877	0	293344	0	81	0	5
CG1168	cgp1284	1679	1680	156	0	6159	10724	0.0093	-6.74855	0	1314623	1	121	0	3.6
CG1169	cgp1285	653	654	0	0	437	1900	0.0004	-11.2877	4e-08	204702	0	29	0	2.2
CG117	cgp0138	1955	1956	0	156	5169	5316	0.015	-6.05889	0	1814216	1	103	0	2.6
CG1170	cgp1286	803	804	0	0	637	554	0.0008	-10.2877	1.4e-07	312756	0	26	0	1.6
CG1171	cgp1287	473	474	0	0	2379	982	0.0003	-11.7027	0	102147	0	44	0	4.6
CG1172	cgp1288	1217	1218	0	0	3219	1386	0.0002	-12.2877	0	713139	0	48	0	2
CG1173	cgp1289	1349	1342	0	0	2241	3600	0.0002	-12.2877	0	850157	0	76	0	2.8
CG1174	metE	2237	2238	156	156	9424	5878	0.0205	-5.60823	0	2339912	2	149	0	3.3
CG1175	cgp1291	347	348	156	0	770	948	0.0913	-3.45324	0.00020714	58120.5	1	15	0.1	2.2
CG1176	cgp1292	1412	1413	0	0	5077	2401	0.0001	-13.2877	0	943884	0	77	0	2.7
CG1177	cgp1293	326	327	0	0	412	190	0.0017	-9.20025	0.00072829	51829.5	0	10	0	1.5
CG1178	cgp1294	896	897	156	0	969	1734	0.0581	-4.10532	3e-08	388410	1	32	0.1	1.8
CG1179	cgp1295	794	795	0	0	1775	2300	0.0002	-12.2877	0	295342	0	53	0	3.3
CG118	cgp0139	782	783	0	0	1284	856	0.0005	-10.9658	0	292450	0	36	0	2.3
CG1180	cgp1296	1649	1650	1091	0	3607	2555	0.1772	-2.49655	0	1.30354e+06	1	72	0	2.2
CG1181	cydC	1556	1553	156	156	4276	2772	0.0444	-4.4933	0	1.13919e+06	2	88	0.1	2.8
CG1182	cydD	1535	1536	0	156	1713	1691	0.0461	-4.43909	0	1.14587e+06	1	46	0	1.5
CG1183	cydB	1001	1002	0	0	1846	1637	0.0003	-11.7027	0	479457	0	45	0	2.2
CG1184	cydA	1541	1542	156	0	4408	4220	0.0182	-5.77992	0	1121831	1	91	0	3
CG1185	cgp1302	2915	2916	0	0	6412	4621	0.0001	-13.2877	0	4072194	0	126	0	2.2
CG1186	cgp1303	395	395	0	0	873	924	0.0006	-10.7027	3.01e-06	74062.5	0	21	0	2.7
CG1187	cgp1304	767	768	156	0	1139	214	0.116	-3.1078	4.432e-05	288389	1	18	0.1	1.2
CG1188	cgp1305	1406	1407	0	156	6562	8018	0.0108	-6.53282	0	912460	1	115	0	4.1
CG1189	cgp1307	2198	2199	0	0	222	1	0.0045	-7.79586	0.00077442	2.40681e+06	0	10	0	0.2
CG119	cgp0141	392	393	0	0	1181	636	0.0006	-10.7027	3e-06	73294.5	0	20	0	2.5
CG1190	cgp1308	689	690	0	0	1634	2576	0.0002	-12.2877	0	225285	0	37	0	2.7
CG1191	cgp1309	1592	1593	0	0	1643	2724	0.0002	-12.2877	0	1.21626e+06	0	66	0	2.1
CG1192	tfdF	1070	1071	0	0	1530	1538	0.0003	-11.7027	0	550494	0	43	0	2
CG1193	cgp1311	887	888	0	0	2558	2186	0.0002	-12.2877	0	368520	0	61	0	3.4
CG1194	cgp1312	473	474	0	0	830	1591	0.0004	-11.2877	0	103332	0	38	0	4
CG1195	cgp1313	542	543	0	0	2405	1634	0.0002	-12.2877	1e-08	139008	0	32	0	2.9
CG1196	putP	1574	1575	0	0	4332	3676	0.0001	-13.2877	0	1184400	0	72	0	2.3
CG1197	cgp1316	3104	3097	156	0	4261	3745	0.0196	-5.673	0	4.6316e+06	1	107	0	1.7
CG1198	cgp1317	854	855	0	0	1935	1198	0.0003	-11.7027	0	344992	0	49	0	2.9
CG1199	cgp1318	1175	1176	0	0	3600	2747	0.0002	-12.2877	0	653856	0	64	0	2.7
CG12	cgp0014	248	245	0	0	627	328	0.001	-9.96578	0.00125016	28910	0	9	0	1.8
CG120	sixA	512	509	0	0	283	1165	0.0007	-10.4804	1.07e-06	123942	0	22	0	2.2
CG1200	cgp1319	2630	2631	468	312	7169	6794	0.0559	-4.16101	0	3.2666e+06	4	154	0.1	2.9
CG1201	lipP	776	777	0	0	1677	1739	0.0003	-11.7027	0	285548	0	42	0	2.7
CG1202	cgp1321	380	381	0	0	1779	1452	0.0003	-11.7027	1e-08	66675	0	31	0	4.1
CG1203	cgp1322	539	540	0	0	1403	743	0.0005	-10.9658	3.7e-07	139320	0	24	0	2.2
CG1204	rosR	488	489	0	0	1570	1044	0.0004	-11.2877	2e-08	112470	0	31	0	3.2
CG1205	cgp1325	215	216	0	0	653	134	0.0013	-9.58727	0.00123719	22356	0	9	0	2.1
CG1206	cgp1326	422	423	0	0	1522	1413	0.0003	-11.7027	0	82273.5	0	34	0	4
CG1207	cgp1327	752	753	0	0	472	818	0.0008	-10.2877	9.93e-06	276728	0	18	0	1.2
CG1208	cgp1328	236	237	0	0	557	262	0.0012	-9.70275	0.00022961	26662.5	0	12	0	2.5
CG1209	ctpC	1877	1878	0	312	4097	2957	0.0444	-4.4933	0	1696804	1	73	0	1.9
CG121	mtlD	1511	1512	623	156	5421	3342	0.089	-3.49005	0	1081913	3	87	0.1	2.9
CG1210	cgp1330	632	633	0	0	574	656	0.0008	-10.2877	1.93e-06	193698	0	21	0	1.7
CG1211	cgpt5025	72	73	0	0	1	0	0.5	-1	0.161993	2628	0	1	0	0.7
CG1212	cgp1332	1583	1584	0	0	5745	5660	0.0001	-13.2877	0	1164240	0	116	0	3.7
CG1213	argS	1652	1653	0	0	0	0	1	0		1.3662e+06	0	0	0	0
CG1214	lysA	1337	1338	0	0	1513	1112	0.0004	-11.2877	0	860334	0	52	0	1.9
CG1215	cgp1335	605	602	0	0	557	1372	0.0005	-10.9658	6.5e-07	174279	0	24	0	2
CG1216	cgp1336	122	123	0	0	788	532	0.0008	-10.2877	1.868e-05	6580.5	0	16	0	6.5
CG1217	hom	1337	1338	0	0	3083	3652	0.0001	-13.2877	0	843609	0	79	0	3
CG1218	thrB	929	930	0	156	1558	1340	0.0542	-4.20556	0	412472	1	46	0.1	2.5
CG1219	arnR	692	693	156	0	1076	454	0.1025	-3.2863	6.1e-07	231472	1	26	0.1	1.9
CG122	rbtT	1337	1338	0	0	3730	3869	0.0001	-13.2877	0	829560	0	99	0	3.7
CG1220	narI	779	780	467	0	2240	1877	0.1136	-3.13797	0	287451	1	44	0.1	2.8
CG1221	narJ	686	687	0	0	4895	1499	0.0002	-12.2877	0	220527	0	45	0	3.3
CG1222	narH	1595	1595	0	0	2946	4059	0.0001	-13.2877	0	1.20821e+06	0	82	0	2.6
CG1223	narG	3746	3747	0	0	10562	12429	0	#NUM!	0	6605961	0	224	0	3
CG1224	narK	1337	1338	0	156	2651	3734	0.0246	-5.3452	0	840959	1	83	0	3.1
CG1225	mog	488	489	156	0	1872	1031	0.0541	-4.20823	2.447e-05	115163	1	19	0.1	1.9
CG1226	cgp1347	1868	1869	156	0	4658	4658	0.0169	-5.88683	0	1648491	1	106	0	2.8
CG1227	cgp1348	1010	1011	467	0	2427	1233	0.1278	-2.96804	0	484295	1	54	0	2.7
CG1228	cgp1349	1403	1404	0	1091	2907	5298	0.1331	-2.90942	0	926682	1	87	0	3.1
CG1229	mob	563	564	0	156	2100	2613	0.0333	-4.90833	0	146371	1	46	0.1	4.1
CG123	sucR	848	849	0	0	2167	2037	0.0002	-12.2877	0	340449	0	47	0	2.8
CG1230	cgp1351	1211	1212	0	0	2519	2189	0.0002	-12.2877	0	699324	0	58	0	2.4
CG1231	moaA	1208	1209	0	0	2739	3388	0.0002	-12.2877	0	686712	0	73	0	3
CG1232	fadD4	1727	1717	0	0	3722	2533	0.0002	-12.2877	0	1401072	0	86	0	2.5
CG1233	rho	2288	2289	467	0	230	15	1.9024	0.927821	0.00193414	2608321	1	11	0	0.2
CG1234	prfA	1076	1076	0	0	0	13	0.0714	-3.80793	0.0416084	577274	0	3	0	0.1
CG1235	cgp1356	839	840	156	156	0	4	62.6	5.96809	0.499287	352802	2	2	0.1	0.1
CG1236	cgp1358	650	651	0	0	0	0	1	0		211900	0	0	0	0
CG1237	cgp1359	1148	1149	0	0	0	4	0.2	-2.32193	0.0416099	658377	0	3	0	0.1
CG1238	cgp1360	449	450	0	0	164	275	0.0023	-8.76415	0.0125438	100125	0	5	0	0.6
CG1239	cgp1361	242	243	0	0	0	148	0.0067	-7.22162	0.0788635	29281.5	0	2	0	0.4
CG124	xylB	1382	1383	0	15736	2965	3780	2.3328	1.22206	0	906593	1	75	0	2.7
CG1240	atpB	935	936	0	0	0	0	1	0		438048	0	0	0	0
CG1241	atpE	242	243	0	0	0	0	1	0		29524.5	0	0	0	0
CG1242	atpF	566	567	0	0	0	0	1	0		160744	0	0	0	0
CG1243	atpH	815	816	0	0	1	0	0.5	-1	0.158952	332520	0	1	0	0.1
CG1244	atpA	1643	1644	0	0	9	0	0.1	-3.32193	0.158802	1350546	0	1	0	0
CG1245	atpG	977	978	0	0	0	0	1	0		478242	0	0	0	0
CG1246	atpD	1451	1452	0	0	0	0	1	0		1054152	0	0	0	0
CG1247	atpC	374	375	0	0	52	2	0.0182	-5.77992	0.0415635	69750	0	3	0	0.4
CG1248	cgp1370	473	474	0	0	317	280	0.0017	-9.20025	0.00024727	109494	0	12	0	1.3
CG1249	cgp1371	692	693	0	0	1942	872	0.0004	-11.2877	0	225918	0	42	0	3
CG125	panC	839	835	0	0	1090	2274	0.0003	-11.7027	0	329408	0	46	0	2.8
CG1250	cgp1372	287	288	0	0	374	334	0.0014	-9.48036	0.0012647	40176	0	9	0	1.6
CG1251	cgp1373	455	456	0	0	655	886	0.0006	-10.7027	7e-08	97812	0	27	0	3
CG1252	cgp1374	305	306	0	0	419	648	0.0009	-10.1178	4.87e-06	43911	0	19	0	3.1
CG1253	cgp1375	923	924	0	0	1778	2458	0.0002	-12.2877	0	401940	0	56	0	3
CG1254	ssuD1	1145	1146	0	0	5209	3615	0.0001	-13.2877	0	618840	0	66	0	2.9
CG1255	ssuC	770	771	156	0	1942	2132	0.0385	-4.699	0	282581	1	39	0.1	2.5
CG1256	ssuB	731	732	0	0	1413	1434	0.0004	-11.2877	0	255834	0	33	0	2.3
CG1257	ssuA	959	960	0	0	2086	1450	0.0003	-11.7027	0	441120	0	41	0	2.1
CG1258	glgB	2195	2196	156	156	9116	8900	0.0174	-5.84477	0	2235608	2	167	0	3.8
CG1259	glgE	2027	2028	0	0	2534	3316	0.0002	-12.2877	0	1963104	0	95	0	2.3
CG126	panB	809	810	0	0	1166	1469	0.0004	-11.2877	1e-08	315495	0	32	0	2
CG1260	cgp1383	872	873	0	0	613	1341	0.0005	-10.9658	0	364041	0	40	0	2.3
CG1261	cgp1384	800	801	0	0	3887	1298	0.0002	-12.2877	0	301977	0	50	0	3.1
CG1262	cgp1385	1163	1164	0	0	2169	4232	0.0002	-12.2877	0	640200	0	67	0	2.9
CG1263	fixA	788	789	0	0	0	15	0.0625	-4	0.158962	310866	0	1	0	0.1
CG1264	fixB	953	954	0	0	5	0	0.1667	-2.58467	0.0226935	453150	0	4	0	0.2
CG1265	nifS1	1130	1131	0	0	32	55	0.0114	-6.45482	0.00710642	636188	0	6	0	0.3
CG1266	cgp1390	143	144	0	0	25	199	0.0044	-7.82828	0.0122697	10008	0	5	0	1.7
CG1267	cgp1391	1148	1145	156	156	3220	2654	0.0533	-4.22972	0	623490	2	58	0.1	2.5
CG1268	cgp1392	227	228	0	0	179	306	0.0021	-8.89539	0.0124179	25422	0	5	0	1.1
CG1269	cgp1393	506	433	0	0	2135	595	0.0004	-11.2877	3.4e-07	88548.5	0	25	0	2.9
CG127	cgp0150	953	954	0	156	1427	836	0.0693	-3.851	8e-08	441236	1	30	0.1	1.6
CG1270	speE2	944	945	0	0	3059	1299	0.0002	-12.2877	0	420998	0	54	0	2.9
CG1271	cgp1395	1142	1143	0	0	4771	5134	0.0001	-13.2877	0	604076	0	87	0	3.8
CG1272	cgp1396	398	399	0	0	340	840	0.0008	-10.2877	5.22e-06	75810	0	19	0	2.4
CG1273	trmU	1097	1098	0	0	0	71	0.0139	-6.16877	0.022701	600606	0	4	0	0.2
CG1274	cgp1398	992	989	0	156	1803	1469	0.048	-4.38082	0	469293	1	41	0.1	2.1
CG1275	cgp1399	1463	1464	156	312	3019	4915	0.0591	-4.0807	0	1005842	2	94	0.1	3.2
CG1276	cgp1400	713	714	156	0	2516	1928	0.0353	-4.82419	0	239916	1	43	0.1	3
CG1277	ligA	2042	2043	0	0	1	7	0.1111	-3.17007	0.00405434	2079774	0	7	0	0.2
CG1278	cgp1402	665	666	0	0	1620	4201	0.0002	-12.2877	0	208791	0	39	0	2.9
CG1279	gatC	299	300	0	0	1	0	0.5	-1	0.159463	44850	0	1	0	0.2
CG128	mag	569	570	0	0	1326	764	0.0005	-10.9658	2.2e-07	155325	0	26	0	2.3
CG1280	gatA	1493	1494	0	0	6	4	0.0909	-3.45958	0.022714	1113030	0	4	0	0.1
CG1281	cgp1405	851	852	0	0	1793	1700	0.0003	-11.7027	0	346764	0	40	0	2.3
CG1282	cgp1408	320	321	0	0	1156	669	0.0005	-10.9658	1.63e-06	48150	0	22	0	3.4
CG1283	pfk	1031	1032	0	0	36	63	0.01	-6.64386	0.0040337	528900	0	7	0	0.3
CG1284	rbsR	1109	1096	0	156	1791	1367	0.0497	-4.33061	0	579794	1	39	0	1.8
CG1285	rbsA	1574	1575	156	156	4796	2256	0.0444	-4.4933	0	1168711	2	94	0.1	3
CG1286	rbsC	974	971	0	0	2253	1311	0.0003	-11.7027	0	449088	0	47	0	2.4
CG1287	rbsB	944	945	0	0	2235	2353	0.0002	-12.2877	0	421942	0	53	0	2.8
CG1288	rbsD	371	372	0	0	839	750	0.0006	-10.7027	9.8e-07	65100	0	22	0	3
CG1289	cgp1417	638	639	0	0	990	883	0.0005	-10.9658	6.6e-07	196812	0	23	0	1.8
CG129	cgp0152	656	657	0	0	1540	1917	0.0003	-11.7027	0	204656	0	34	0	2.6
CG1290	cgp1418	1016	1017	312	0	1494	2618	0.0761	-3.71596	0	491235	1	53	0	2.6
CG1291	cgp1419	1007	1008	0	0	2364	1394	0.0003	-11.7027	0	481824	0	53	0	2.6
CG1292	gatB	1505	1506	0	0	0	0	1	0		1134018	0	0	0	0
CG1293	cgp1421	674	675	0	0	2871	1303	0.0002	-12.2877	0	213638	0	42	0	3.1
CG1294	cgp1423	1076	1077	467	467	1895	1666	0.2625	-1.92961	0	556316	2	47	0.1	2.2
CG1295	lysE	701	698	0	0	976	1620	0.0004	-11.2877	0	232085	0	33	0	2.4
CG1296	lysG	872	873	0	0	2247	2885	0.0002	-12.2877	0	360986	0	46	0	2.6
CG1297	gst	1079	1080	156	0	4367	2834	0.0218	-5.51953	0	546502	1	71	0	3.3
CG1298	cgp1427	554	555	0	0	1943	1008	0.0003	-11.7027	2.2e-07	147075	0	25	0	2.3
CG1299	cgp1429	1058	1059	0	0	2954	1468	0.0002	-12.2877	0	531618	0	57	0	2.7
CG13	gyrA	2570	2571	0	0	7	4	0.0833	-3.58554	0.0416223	3301164	0	3	0	0.1
CG130	hde	926	927	156	0	1653	2890	0.0346	-4.85308	0	405579	1	53	0.1	2.9
CG1300	ilvD	1841	1842	156	0	1759	1167	0.0536	-4.22162	0	1.63204e+06	1	71	0	1.9
CG1301	cgp1433	635	636	0	0	1078	346	0.0007	-10.4804	4e-08	193344	0	28	0	2.2
CG1302	cgp1434	1601	1602	0	156	3421	4234	0.0205	-5.60823	0	1.22075e+06	1	80	0	2.5
CG1303	ilvB	1880	1881	156	0	11341	8944	0.0077	-7.02093	0	1619572	1	169	0	4.5
CG1304	ilvN	518	519	0	0	2956	3805	0.0001	-13.2877	0	120668	0	55	0	5.3
CG1305	ilvC	1016	1017	0	0	1130	866	0.0005	-10.9658	0	495788	0	42	0	2.1
CG1306	cgp1438	500	501	0	0	1060	1204	0.0004	-11.2877	1e-08	117735	0	31	0	3.1
CG1307	cgp1440	269	270	0	0	565	152	0.0014	-9.48036	0.00391726	35505	0	7	0	1.3
CG1308	cgp1441	884	885	0	0	2922	1564	0.0002	-12.2877	0	368602	0	52	0	2.9
CG1309	cgp1442	434	435	0	0	684	1310	0.0005	-10.9658	1.2e-07	88957.5	0	26	0	3
CG131	cgp0154	605	606	0	0	968	897	0.0005	-10.9658	3e-08	174831	0	29	0	2.4
CG1310	cgp1443	371	344	0	0	223	256	0.0021	-8.89539	0.00024047	57104	0	12	0	1.7
CG1311	cgp1444	488	489	0	0	1262	1364	0.0004	-11.2877	7e-08	112959	0	28	0	2.9
CG1312	cgp1447	956	957	0	0	383	132	0.0019	-9.03978	0.0004421	452661	0	11	0	0.6
CG1313	cgp1448	1817	1818	156	0	4282	4064	0.0188	-5.73312	0	1.57441e+06	1	88	0	2.4
CG1314	cgp1449	1619	1620	0	0	4414	4619	0.0001	-13.2877	0	1246590	0	83	0	2.6
CG1315	serA	1592	1593	156	0	4081	2970	0.0223	-5.48681	0	1196378	1	93	0	2.9
CG1316	cgp1452	869	870	0	156	729	1512	0.07	-3.8365	0	361501	1	40	0.1	2.3
CG1317	leuB	1022	1023	0	0	3529	3833	0.0001	-13.2877	0	486948	0	73	0	3.6
CG1318	cgp1454	1031	1032	0	156	2307	2861	0.0304	-5.03978	0	500538	1	63	0	3.1
CG1319	cgp1456	1856	1857	0	0	4931	4219	0.0001	-13.2877	0	1.63509e+06	0	96	0	2.6
CG132	cgp0155	560	540	0	156	1795	886	0.0585	-4.09542	0	136094	1	37	0.1	3.4
CG1320	dnaQ2	593	594	0	0	732	1756	0.0004	-11.2877	2.2e-07	168993	0	25	0	2.1
CG1321	cgp1458	806	807	0	0	2067	853	0.0003	-11.7027	0	309888	0	39	0	2.4
CG1322	cgp1459	605	606	0	0	721	1488	0.0005	-10.9658	0	173316	0	34	0	2.8
CG1323	entC	1130	1131	0	0	89	12	0.0098	-6.673	0.00132781	634491	0	9	0	0.4
CG1324	gltS	1481	1482	0	0	38	0	0.0256	-5.28771	0.0786846	1096680	0	2	0	0.1
CG1325	cgp1464	215	216	0	0	11	209	0.0045	-7.79586	0.00123718	22356	0	9	0	2.1
CG1326	cgp1465	473	474	0	0	2876	2692	0.0002	-12.2877	0	104754	0	33	0	3.5
CG1327	cgp1466	524	525	0	0	1193	361	0.0006	-10.7027	9.48e-06	133088	0	18	0	1.7
CG1328	cgp1467	455	456	0	0	943	1222	0.0005	-10.9658	1.2e-07	98040	0	26	0	2.9
CG1329	cgp1468	305	306	0	0	2342	1589	0.0003	-11.7027	0	41769	0	33	0	5.4
CG133	cysR	1145	1146	22752	25400	322	318	75.1217	6.23116	8.1e-07	681386	65	21	2.8	0.9
CG1330	cgp1469	182	183	0	0	784	828	0.0006	-10.7027	1.257e-05	15189	0	17	0	4.6
CG1331	cgpt5026	71	72	0	0	0	0	1	0		2592	0	0	0	0
CG1332	cgpt5027	72	73	0	0	0	0	1	0		2664.5	0	0	0	0
CG1333	cgpt5028	71	72	0	0	0	0	1	0		2592	0	0	0	0
CG1334	cgpt5029	72	73	0	0	0	0	1	0		2664.5	0	0	0	0
CG1335	cgp4019	92	93	0	0	31	498	0.0019	-9.03978	0.0413545	4185	0	3	0	1.6
CG1336	cgp1470	95	96	0	0	0	0	1	0		4608	0	0	0	0
CG1337	cgp1471	122	123	0	0	309	292	0.0017	-9.20025	0.0223119	7318.5	0	4	0	1.6
CG1338	cgpt5030	75	76	0	0	163	0	0.0061	-7.35698	0.0793357	2812	0	2	0	1.3
CG1339	cgp1472	131	132	0	0	428	602	0.001	-9.96578	0.00020357	7920	0	12	0	4.5
CG134	cgp0158	1274	1275	0	0	3537	6414	0.0001	-13.2877	0	765638	0	77	0	3
CG1340	cgp1473	185	186	0	0	142	84	0.0044	-7.82828	0.0123604	16833	0	5	0	1.3
CG1341	cgp1474	1145	1146	156	0	1321	1289	0.0601	-4.05649	1e-08	637761	1	34	0	1.5
CG1342	cgp1475	326	323	0	0	847	526	0.0007	-10.4804	7.879e-05	49903.5	0	14	0	2.2
CG1343	thiC	1763	1760	156	0	3134	2450	0.0281	-5.15329	0	1482824	1	76	0	2.2
CG1344	cgp1478	461	462	0	0	64	639	0.0014	-9.48036	4.771e-05	103257	0	15	0	1.6
CG1345	glgP1	2387	2388	312	27888	6412	10211	1.6964	0.762476	0	2639010	4	183	0.1	3.8
CG1346	cgp1480	125	126	156	0	306	15	0.4876	-1.03623	0.0508926	7687.5	1	5	0.4	2
CG1347	cgp1481	158	159	0	0	611	475	0.0009	-10.1178	0.00021326	11686.5	0	12	0	3.8
CG1348	cgp1482	1409	1410	467	156	3325	3488	0.0916	-3.44851	0	944754	2	72	0.1	2.6
CG1349	cgp1483	752	753	0	0	1234	1765	0.0003	-11.7027	0	269574	0	37	0	2.5
CG135	cgp0159	518	519	0	0	576	974	0.0006	-10.7027	6.3e-07	128712	0	23	0	2.2
CG1350	cgp1484	479	480	0	0	845	788	0.0006	-10.7027	9.34e-06	110880	0	18	0	1.9
CG1351	cgp1485	566	549	0	0	988	1543	0.0004	-11.2877	4e-08	143014	0	29	0	2.6
CG1352	cgp1486	707	708	0	0	1731	1942	0.0003	-11.7027	0	232932	0	51	0	3.6
CG1353	leuC	1445	1446	156	156	8247	7783	0.0195	-5.68038	0	955852	2	130	0.1	4.5
CG1354	leuD	593	594	0	0	1549	1985	0.0003	-11.7027	0	165726	0	38	0	3.2
CG1355	cgp1490	1010	1011	0	156	3088	3875	0.0225	-5.47393	0	478722	1	67	0	3.3
CG1356	cgp1491	158	159	0	0	61	97	0.0063	-7.31043	0.0414701	12402	0	3	0	0.9
CG1357	gpsA	998	999	0	0	311	7	0.0031	-8.33352	0.0226961	497002	0	4	0	0.2
CG1358	ddlA	1082	1083	0	0	0	0	1	0		586444	0	0	0	0
CG1359	cgp1494	980	981	0	0	319	2	0.0031	-8.33352	0.0070993	478238	0	6	0	0.3
CG136	cgp0160	422	423	0	0	1007	635	0.0006	-10.7027	5.29e-06	85446	0	19	0	2.2
CG1360	thiL	917	918	0	0	0	2	0.3333	-1.58511	0.158919	420903	0	1	0	0.1
CG1361	ung	749	749	0	0	1733	2451	0.0002	-12.2877	0	262524	0	50	0	3.3
CG1362	cgp1497	1703	1704	0	0	157	1	0.0063	-7.31043	0.0126393	1447548	0	5	0	0.1
CG1363	cgp1498	2123	2124	156	0	2507	3097	0.028	-5.15843	0	2.17713e+06	1	76	0	1.8
CG1364	cgp1499	215	216	0	0	360	94	0.0022	-8.82828	0.00691125	22680	0	6	0	1.4
CG1365	cgp1500	584	584	0	0	1208	1017	0.0004	-11.2877	3e-08	162060	0	29	0	2.5
CG1366	coaD	482	483	0	0	0	1	0.5	-1	0.159157	116403	0	1	0	0.1
CG1367	cgp1502	764	765	0	0	1321	1740	0.0003	-11.7027	0	276930	0	41	0	2.7
CG1368	cgp1503	950	951	0	0	2093	3182	0.0002	-12.2877	0	423195	0	62	0	3.3
CG1369	cgp1504	983	984	0	156	3823	2178	0.0262	-5.25429	0	452170	1	69	0.1	3.5
CG137	cgp0161	1943	1944	156	0	5450	4338	0.016	-5.96578	0	1754514	1	142	0	3.7
CG1370	cgp1505	809	810	0	0	1629	1441	0.0003	-11.7027	0	311040	0	42	0	2.6
CG1371	cgp1506	980	981	0	0	2820	2767	0.0002	-12.2877	0	451260	0	63	0	3.2
CG1372	cgpt5031	76	77	0	0	0	0	1	0		2964.5	0	0	0	0
CG1373	polA	2669	2666	312	156	243	324	0.8257	-0.27631	0.00011787	3.52982e+06	3	21	0.1	0.4
CG1374	cgp1526	1400	1401	0	0	3399	2976	0.0002	-12.2877	0	932366	0	73	0	2.6
CG1375	cgp1527	977	978	0	0	3281	2276	0.0002	-12.2877	0	446946	0	65	0	3.3
CG1376	dkgX	875	876	0	0	1813	1417	0.0003	-11.7027	0	364854	0	43	0	2.5
CG1377	cgp1529	161	162	0	0	14	47	0.0161	-5.9568	0.0789707	12960	0	2	0	0.6
CG1378	cgp1530	830	831	0	0	1569	2125	0.0003	-11.7027	0	329492	0	39	0	2.3
CG1379	rpsA	1460	1461	0	0	0	1	0.5	-1	0.158821	1066530	0	1	0	0
CG138	cgp0162	1541	1538	0	0	2984	3120	0.0002	-12.2877	0	1116588	0	89	0	2.9
CG1380	ptsG	2051	2052	156	468	1792	1854	0.1714	-2.54456	0	2.02954e+06	3	77	0.1	1.9
CG1381	coaE	602	603	0	0	0	0	1	0		181804	0	0	0	0
CG1382	cgp1540	1085	1086	0	156	2132	2349	0.035	-4.8365	0	558224	1	61	0	2.8
CG1383	cgp1541	509	510	0	0	1997	1832	0.0003	-11.7027	0	120870	0	37	0	3.6
CG1384	cgp1542	248	167	0	0	104	279	0.0026	-8.58727	0.0224272	13610.5	0	4	0	1.2
CG1385	uriH	938	939	156	0	2365	2482	0.0324	-4.94786	0	415057	1	56	0.1	3
CG1386	uriT	1451	1452	0	0	4155	3451	0.0001	-13.2877	0	990990	0	88	0	3
CG1387	rbsK1	923	916	0	0	2364	2948	0.0002	-12.2877	0	394796	0	57	0	3.1
CG1388	uriR	1040	1041	0	312	1453	3856	0.0589	-4.08559	0	511168	2	62	0.1	3
CG1389	cgp1548	659	660	0	0	901	1176	0.0005	-10.9658	6.6e-07	210210	0	23	0	1.7
CG139	cgp0163	1463	1464	0	0	5542	6429	0.0001	-13.2877	0	992592	0	109	0	3.7
CG1390	cgp1549	332	333	0	0	364	749	0.0009	-10.1178	2.619e-05	52780.5	0	16	0	2.4
CG1391	uvrB	2099	2100	312	0	4178	5224	0.0333	-4.90833	0	2.12103e+06	1	83	0	2
CG1392	uspA1	443	444	0	0	623	146	0.0013	-9.58727	0.00024605	95904	0	12	0	1.4
CG1393	qorR	383	384	0	156	1163	811	0.0795	-3.6529	8.9e-07	69126.5	1	25	0.1	3.3
CG1394	qor2	848	849	0	0	1780	1595	0.0003	-11.7027	0	338751	0	54	0	3.2
CG1395	cgp1555	2267	2268	312	0	4247	6613	0.0288	-5.11779	0	2.45062e+06	1	109	0	2.4
CG1396	cgp1556	914	915	0	0	3191	6627	0.0001	-13.2877	0	391620	0	60	0	3.3
CG1397	cgp1559	602	603	0	0	3166	2677	0.0002	-12.2877	0	168538	0	46	0	3.8
CG1398	uvrA	2849	2833	312	156	10857	8764	0.0239	-5.38685	0	3.73262e+06	2	202	0	3.6
CG1399	cgp1562	2126	2127	0	0	5301	5175	0.0001	-13.2877	0	2.14083e+06	0	116	0	2.7
CG14	cgp0016	344	345	156	0	1315	1830	0.0499	-4.32482	1e-08	53830	1	34	0.1	4.9
CG140	cgp0165	1733	1734	156	935	5596	5905	0.0949	-3.39745	0	1.39087e+06	4	136	0.1	3.9
CG1400	infC	569	570	0	0	0	4	0.2	-2.32193	0.0787406	161880	0	2	0	0.2
CG1401	rpmL	194	195	0	0	0	0	1	0		19012.5	0	0	0	0
CG1402	rplT	383	384	0	0	522	0	0.0019	-9.03978	0.0125215	72768	0	5	0	0.7
CG1403	cgp1566	812	813	0	0	1843	3592	0.0002	-12.2877	0	314631	0	40	0	2.5
CG1404	cgp1567	491	492	0	0	435	273	0.0014	-9.48036	0.00129954	118818	0	9	0	0.9
CG1405	ugpA	932	929	0	156	963	1774	0.0573	-4.12532	1e-08	416203	1	34	0.1	1.8
CG1406	ugpE	836	837	0	0	1293	1772	0.0003	-11.7027	0	333963	0	40	0	2.4
CG1407	ugpB	1316	1317	0	0	3876	3494	0.0001	-13.2877	0	813906	0	82	0	3.1
CG1408	ugpC	1226	1227	312	0	3534	3615	0.0438	-4.51293	0	711688	1	69	0	2.8
CG1409	glpQ2	707	708	467	0	1351	828	0.2147	-2.21961	0	238260	1	36	0.1	2.5
CG141	cgp0166	1067	1068	0	0	2651	2150	0.0002	-12.2877	0	542010	0	53	0	2.5
CG1410	cgp1573	815	816	0	0	1002	902	0.0005	-10.9658	0	317424	0	38	0	2.3
CG1411	pheS	1037	1038	0	0	2	1	0.25	-2	0.0416074	537165	0	3	0	0.1
CG1412	cgp1575	2507	2508	0	0	17	2	0.05	-4.32193	0.0126503	3138762	0	5	0	0.1
CG1413	cgp1577	974	975	0	0	5427	3560	0.0001	-13.2877	0	435825	0	84	0	4.3
CG1414	cgp1578	1385	1386	0	0	3347	3138	0.0002	-12.2877	0	905751	0	81	0	2.9
CG1415	cgp1579	404	405	0	0	1395	1001	0.0004	-11.2877	2e-08	76140	0	29	0	3.6
CG1416	argC	1043	1044	0	0	4081	3146	0.0001	-13.2877	0	503730	0	80	0	3.8
CG1417	argJ	1166	1167	0	0	3953	3776	0.0001	-13.2877	0	638349	0	74	0	3.2
CG1418	argB	953	954	312	0	3434	2436	0.0533	-4.22972	0	428847	1	56	0.1	2.9
CG1419	argD	1175	1176	0	156	4491	4514	0.0174	-5.84477	0	650348	1	73	0	3.1
CG142	cgp0167	758	759	0	0	3670	1768	0.0002	-12.2877	0	265650	0	60	0	4
CG1420	argF	959	960	0	0	1083	387	0.0007	-10.4804	3e-08	446880	0	29	0	1.5
CG1421	argR	515	516	0	0	1596	14	0.0006	-10.7027	3.19e-06	127968	0	20	0	1.9
CG1422	argG	1205	1206	156	156	9425	6342	0.0199	-5.65109	0	653112	2	134	0.1	5.6
CG1423	argH	1433	1434	0	156	7497	7578	0.0104	-6.58727	0	941463	1	124	0	4.3
CG1424	cgp1589	1145	1142	0	0	3204	2701	0.0002	-12.2877	0	609257	0	75	0	3.3
CG1425	cgp1590	1577	1578	0	0	3544	2386	0.0002	-12.2877	0	1192179	0	67	0	2.1
CG1426	cgp1591	614	601	0	0	946	1183	0.0005	-10.9658	0	170684	0	33	0	2.7
CG1427	cgp1592	179	180	0	0	3	0	0.25	-2	0.160003	16110	0	1	0	0.3
CG1428	tyrS	1262	1263	0	0	3	314	0.0031	-8.33352	0.00711126	793796	0	6	0	0.2
CG1429	uspA2	467	468	0	0	1428	1985	0.0003	-11.7027	0	100620	0	38	0	4.1
CG143	cgp0168	881	882	0	0	2050	2572	0.0002	-12.2877	0	365148	0	55	0	3.1
CG1430	cgpr5117	1523	1524	0	0	0	0	1	0		1161288	0	0	0	0
CG1431	cgpr5129	3085	3086	0	0	3	0	0.25	-2	0.158734	4760155	0	1	0	0
CG1432	cgpr5105	119	120	0	0	0	0	1	0		7200	0	0	0	0
CG1433	cgp1597	1304	1305	0	467	1943	501	0.1914	-2.38534	1e-08	829344	1	35	0	1.3
CG1434	cgp1598	986	987	0	0	1409	2200	0.0003	-11.7027	0	464384	0	46	0	2.3
CG1435	cgp1599	164	165	0	0	165	13	0.0056	-7.48036	0.00683748	13117.5	0	6	0	1.8
CG1436	cgp1600	821	822	0	0	1590	437	0.0005	-10.9658	3.43e-06	329622	0	20	0	1.2
CG1437	ppnK	962	962	0	0	0	1	0.5	-1	0.158907	462241	0	1	0	0.1
CG1438	recN	1781	1782	0	0	3811	3560	0.0001	-13.2877	0	1497771	0	101	0	2.8
CG1439	cgp1603	1184	1185	0	0	3514	1494	0.0002	-12.2877	0	676042	0	45	0	1.9
CG144	cgp0170	719	720	156	0	2540	1419	0.0396	-4.65836	0	243733	1	46	0.1	3.2
CG1440	cgp1604	965	966	0	0	1913	947	0.0003	-11.7027	0	450639	0	34	0	1.8
CG1441	pyrG	1664	1665	0	0	2280	3410	0.0002	-12.2877	0	1302030	0	104	0	3.1
CG1442	cgp1607	671	668	0	156	1208	676	0.0833	-3.58554	7e-08	213438	1	30	0.1	2.2
CG1443	xerD	914	915	0	0	174	469	0.0016	-9.28771	0.00076292	414038	0	10	0	0.5
CG1444	cgp1609	1532	1533	0	0	3210	2569	0.0002	-12.2877	0	1.11219e+06	0	83	0	2.7
CG1445	parA2	872	873	0	0	2041	849	0.0003	-11.7027	0	364041	0	39	0	2.2
CG1446	scpA	767	768	0	0	971	553	0.0007	-10.4804	5e-08	284160	0	29	0	1.9
CG1447	cgp1612	563	564	312	0	1439	2133	0.0876	-3.51293	0	147788	1	41	0.1	3.6
CG1448	sseA2	869	870	0	0	3227	2564	0.0002	-12.2877	0	357135	0	49	0	2.8
CG1449	scpB	578	579	0	0	938	2018	0.0003	-11.7027	1e-08	158936	0	30	0	2.6
CG145	cgp0171	335	328	0	0	923	349	0.0008	-10.2877	0.00072845	52152	0	10	0	1.5
CG1450	rluA	962	963	0	0	0	1	0.5	-1	0.158907	463203	0	1	0	0.1
CG1451	cmk	710	707	0	0	0	192	0.0052	-7.58727	0.0125909	248157	0	5	0	0.4
CG1452	cgp1617	1631	1628	0	0	1	1	0.3333	-1.58511	0.0786815	1323564	0	2	0	0.1
CG1453	cgp1618	668	669	0	0	1886	1434	0.0003	-11.7027	0	210066	0	41	0	3.1
CG1454	cgp1619	500	501	0	0	1624	1387	0.0003	-11.7027	7e-08	118737	0	27	0	2.7
CG1455	cgp1620	815	816	0	0	1458	1214	0.0004	-11.2877	0	316608	0	41	0	2.5
CG1456	cgp1621	1418	1419	156	0	4019	2999	0.0224	-5.48036	0	950753	1	80	0	2.8
CG1457	cgp1622	1769	1766	0	312	4516	2811	0.0427	-4.54962	0	1479069	1	92	0	2.6
CG1458	cgp1623	806	807	0	0	0	1	0.5	-1	0.158955	325221	0	1	0	0.1
CG1459	cgp1624	1550	1547	0	0	4426	4869	0.0001	-13.2877	0	1141686	0	71	0	2.3
CG146	panD	410	411	0	0	472	571	0.001	-9.96578	8.136e-05	81583.5	0	15	0	1.8
CG1460	cgp1625	188	189	0	0	462	187	0.0015	-9.38082	0.00216574	17104.5	0	8	0	2.1
CG1461	cgpt5032	76	77	0	0	132	179	0.0032	-8.28771	0.00353799	2695	0	7	0	4.5
CG1462	cgp1626	389	390	0	0	976	1182	0.0005	-10.9658	3.3e-07	71370	0	25	0	3.2
CG1463	cgp1628	1181	1182	156	312	4127	3305	0.0631	-3.98622	0	658446	3	72	0.1	3
CG1464	secA2	2291	2292	0	0	2	1	0.25	-2	0.041621	2623194	0	3	0	0.1
CG1465	cgp1630	431	432	467	156	499	892	0.4483	-1.15746	1.32e-06	87937	2	30	0.2	3.5
CG1466	cgp1631	758	759	0	0	437	384	0.0012	-9.70275	6.8e-07	279312	0	23	0	1.5
CG1467	cgp1632	635	636	0	0	987	812	0.0006	-10.7027	2.2e-07	194298	0	25	0	2
CG1468	cgp1633	575	576	0	0	1195	350	0.0006	-10.7027	3.7e-07	158976	0	24	0	2.1
CG1469	cgp1635	512	513	0	0	430	483	0.0011	-9.82828	3.19e-06	126454	0	21	0	2
CG147	cgp0173	1661	1662	0	0	2186	1556	0.0003	-11.7027	0	1313811	0	84	0	2.5
CG1470	cgp1636	1451	1452	0	0	2494	4433	0.0001	-13.2877	0	1000428	0	74	0	2.5
CG1471	cgp1638	893	894	0	935	2079	3215	0.1768	-2.49981	0	375078	2	58	0.1	3.2
CG1472	cgp1639	1064	1065	0	156	2029	2360	0.0358	-4.8039	0	532526	1	67	0	3.1
CG1473	cgp1640	1382	1379	156	0	4859	3889	0.0179	-5.8039	0	900511	1	75	0	2.7
CG1474	cgp1641	1346	1347	0	0	2294	3834	0.0002	-12.2877	0	859386	0	71	0	2.6
CG1475	cgp1642	737	738	0	0	1159	1557	0.0004	-11.2877	0	260145	0	34	0	2.3
CG1476	gnd	1454	1455	0	0	2	29	0.0312	-5.00231	0.0786853	1.05706e+06	0	2	0	0.1
CG1477	cgp1644	464	465	0	0	1661	720	0.0004	-11.2877	3.5e-07	102532	0	24	0	2.6
CG1478	cgp1645	584	585	0	0	1613	2059	0.0003	-11.7027	0	156488	0	51	0	4.4
CG1479	cgp1646	743	740	0	0	2188	1617	0.0003	-11.7027	0	259740	0	40	0	2.7
CG148	cgp0174	1139	1140	0	0	2752	2446	0.0002	-12.2877	0	616170	0	59	0	2.6
CG1480	cgp1647	743	744	0	0	3312	2445	0.0002	-12.2877	0	259284	0	47	0	3.2
CG1481	cgp1648	881	853	0	0	4210	5313	0.0001	-13.2877	0	339068	0	60	0	3.5
CG1482	pctD	848	845	156	0	2801	3939	0.0233	-5.42353	0	332520	1	59	0.1	3.5
CG1483	pctC	806	807	156	0	3032	2152	0.0303	-5.04454	0	304254	1	54	0.1	3.3
CG1484	pctB	806	803	156	156	2966	2261	0.0599	-4.0613	0	298750	2	64	0.1	4
CG1485	pctA	1052	1053	0	312	4358	3596	0.0393	-4.66933	0	512849	1	83	0	3.9
CG1486	pgp1	704	705	156	0	1010	1845	0.055	-4.18442	4e-08	237947	1	34	0.1	2.4
CG1487	thiD1	2291	2292	0	312	6964	6975	0.0225	-5.47393	0	2480016	2	135	0	2.9
CG1488	thiM	806	807	0	0	1515	2822	0.0002	-12.2877	0	303836	0	55	0	3.4
CG1489	ndh	1403	1404	0	0	366	1213	0.0006	-10.7027	6.13e-06	972270	0	19	0	0.7
CG149	cgp0175	491	492	468	0	1426	824	0.2084	-2.26257	1.123e-05	115881	2	23	0.2	2.3
CG1490	ufaA	1316	1317	0	156	5608	4119	0.0161	-5.9568	0	804056	1	99	0	3.8
CG1491	cgp1658	1388	1389	0	0	3280	2643	0.0002	-12.2877	0	918129	0	67	0	2.4
CG1492	gpt	476	477	0	0	1531	1050	0.0004	-11.2877	0	104463	0	39	0	4.1
CG1493	cgp1660	572	573	0	0	554	677	0.0008	-10.2877	9.6e-06	159008	0	18	0	1.6
CG1494	cgp1661	998	999	0	0	1141	821	0.0005	-10.9658	2e-08	484016	0	30	0	1.5
CG1495	cgp1662	485	486	0	0	1655	134	0.0006	-10.7027	2.1e-07	112023	0	25	0	2.6
CG1496	cgp1663	665	666	0	0	291	506	0.0013	-9.58727	0.00131257	218781	0	9	0	0.7
CG1497	cgp1664	1517	1518	0	0	1375	1155	0.0004	-11.2877	0	1124079	0	37	0	1.2
CG1498	cgp1665	617	618	0	0	626	1345	0.0005	-10.9658	3.8e-07	183546	0	24	0	1.9
CG1499	cgp1668	191	192	0	0	239	881	0.0009	-10.1178	0.00122356	17568	0	9	0	2.3
CG15	cgpt5001	76	77	0	0	0	0	1	0		2964.5	0	0	0	0
CG150	cgp0176	782	783	0	0	2389	1527	0.0003	-11.7027	0	291668	0	41	0	2.6
CG1500	cgp1669	743	744	0	0	0	4	0.2	-2.32193	0.158981	276396	0	1	0	0.1
CG1501	cgp1670	338	339	156	0	975	251	0.128	-2.96578	0.00035437	55260	1	14	0.1	2.1
CG1502	cgp1671	398	399	0	0	0	0	1	0		79600.5	0	0	0	0
CG1503	ppmC	812	813	0	0	1	21	0.0435	-4.52284	0.0416006	329265	0	3	0	0.2
CG1504	ppmN	1637	1638	0	0	3732	4722	0.0001	-13.2877	0	1274364	0	83	0	2.5
CG1505	cgp1675	563	564	0	0	938	1177	0.0005	-10.9658	4e-08	151152	0	28	0	2.5
CG1506	lip3	1307	1308	0	0	4342	3023	0.0001	-13.2877	0	810306	0	69	0	2.6
CG1507	cgp1677	776	777	0	26486	2389	740	8.4623	3.08105	0	285569	1	43	0.1	2.8
CG1508	cobL	1292	1258	312	156	5911	4204	0.0464	-4.42973	0	726572	2	108	0.1	4.3
CG1509	cgp4020	362	363	0	0	2089	1621	0.0003	-11.7027	0	59169	0	38	0	5.2
CG151	cgp0177	377	378	0	0	939	1120	0.0005	-10.9658	4e-08	66150	0	30	0	4
CG1510	cgp1679	248	245	0	0	0	563	0.0018	-9.11779	0.00071069	28787.5	0	10	0	2
CG1511	cgp1680	740	741	0	156	2720	3748	0.0243	-5.3629	0	257506	1	48	0.1	3.2
CG1512	pepE	1139	1136	0	0	2973	4893	0.0001	-13.2877	0	603216	0	75	0	3.3
CG1513	cgp1682	641	642	0	0	1947	3029	0.0002	-12.2877	0	193884	0	39	0	3
CG1514	cgp1683	2789	2790	0	1558	9257	9351	0.0838	-3.57691	0	3632732	2	191	0	3.4
CG1515	tatC	944	945	0	0	311	498	0.0012	-9.70275	0.00025647	440842	0	12	0	0.6
CG1516	tatX	317	318	0	0	0	0	1	0		50562	0	0	0	0
CG1517	cgp1686	983	984	156	0	4373	2284	0.0236	-5.40507	0	451674	1	67	0.1	3.4
CG1518	cgp1687	977	978	0	0	2995	2802	0.0002	-12.2877	0	449391	0	60	0	3.1
CG1519	pafA2	1448	1449	0	312	3553	1779	0.0587	-4.0905	0	1002739	1	66	0	2.3
CG152	hrpB	2429	2430	0	156	4183	4726	0.0176	-5.82828	0	2.82612e+06	1	107	0	2.2
CG1520	pup	194	195	0	0	658	1201	0.0005	-10.9658	1.29e-06	16965	0	22	0	5.6
CG1521	pafA1	1544	1545	0	0	6038	4499	0.0001	-13.2877	0	1.10699e+06	0	116	0	3.8
CG1522	mpa	1583	1584	0	0	2742	3426	0.0002	-12.2877	0	1186416	0	90	0	2.8
CG1523	pimT	836	837	0	0	3392	3972	0.0001	-13.2877	0	322245	0	69	0	4.1
CG1524	pepC	1262	1263	0	0	5180	5216	0.0001	-13.2877	0	725594	0	115	0	4.6
CG1525	cgp1694	836	837	156	0	2941	2299	0.03	-5.05889	0	328118	1	54	0.1	3.2
CG1526	cgp1695	260	261	0	0	1009	532	0.0006	-10.7027	2.483e-05	31972.5	0	16	0	3.1
CG1527	cgp1696	1211	1212	0	0	4243	5456	0.0001	-13.2877	0	675690	0	98	0	4
CG1528	cgp1697	1580	1581	0	0	6410	5225	0.0001	-13.2877	0	1165197	0	109	0	3.4
CG1529	hisG	845	846	0	0	2892	2799	0.0002	-12.2877	0	335862	0	52	0	3.1
CG153	cgp0179	317	318	0	0	257	173	0.0023	-8.76415	0.00127256	49131	0	9	0	1.4
CG1530	hisE	263	264	156	0	669	835	0.1043	-3.26119	2.207e-05	32479.5	1	19	0.2	3.6
CG1531	cgp1700	695	696	0	0	2242	1813	0.0002	-12.2877	0	225504	0	50	0	3.6
CG1532	metH	3590	3591	468	0	14929	11218	0.0179	-5.8039	0	5.94514e+06	3	290	0	4
CG1533	cgp1702	572	573	0	0	1409	1084	0.0004	-11.2877	7e-08	156429	0	27	0	2.4
CG1534	cgp1703	1028	1025	0	0	1549	774	0.0004	-11.2877	0	507375	0	35	0	1.7
CG1535	cgp1704	359	360	0	0	1764	1319	0.0003	-11.7027	0	59040	0	33	0	4.6
CG1536	arsC2	1112	1113	156	0	3730	2830	0.0239	-5.38685	0	589348	1	58	0	2.6
CG1537	cgp1706	422	423	0	0	581	890	0.0007	-10.4804	1.578e-05	85869	0	17	0	2
CG1538	cgp1707	641	642	0	0	1459	1192	0.0004	-11.2877	1.13e-06	199020	0	22	0	1.7
CG1539	cgp1708	380	381	156	0	491	167	0.2382	-2.06975	0.00036223	70109	1	14	0.1	1.8
CG154	maa	677	651	0	0	1366	1199	0.0004	-11.2877	1.13e-06	204740	0	24	0	1.8
CG1540	mshC	1262	1263	0	0	3240	3494	0.0001	-13.2877	0	744538	0	84	0	3.3
CG1541	bacA	881	882	0	0	10	139	0.0067	-7.22162	0.0787085	388080	0	2	0	0.1
CG1542	cgp1711	950	951	0	0	135	148	0.0035	-8.15843	0.00403016	448872	0	7	0	0.4
CG1543	lppL	1025	1026	0	0	1	0	0.5	-1	0.158891	525825	0	1	0	0
CG1544	pyrD	1115	1116	0	0	706	96	0.0012	-9.70275	0.0126212	619938	0	5	0	0.2
CG1545	cgp1714	353	354	0	0	588	990	0.0006	-10.7027	2.649e-05	59826	0	16	0	2.3
CG1546	cgp1715	305	306	0	0	0	0	1	0		46818	0	0	0	0
CG1547	cgp1716	1160	1161	0	0	109	0	0.0091	-6.77992	0.0786943	672800	0	2	0	0.1
CG1548	cgp1717	434	435	0	0	1303	1150	0.0004	-11.2877	2e-07	89175	0	25	0	2.9
CG1549	cgp1718	533	534	0	0	3414	2299	0.0002	-12.2877	0	127893	0	57	0	5.3
CG155	alkB	692	693	312	0	2785	2093	0.0642	-3.96128	0	225244	1	46	0.1	3.3
CG1550	tetB	1799	1800	0	1091	4753	7615	0.0883	-3.50144	0	1517491	2	119	0.1	3.3
CG1551	tetA	1610	1611	0	0	5347	6382	0.0001	-13.2877	0	1.20744e+06	0	113	0	3.5
CG1552	cgpt5033	85	86	0	0	0	0	1	0		3698	0	0	0	0
CG1553	cgpt5034	88	89	0	0	0	0	1	0		3960.5	0	0	0	0
CG1554	cgp1722	611	612	0	156	1390	1893	0.0478	-4.38685	1.72e-06	180238	1	26	0.1	2.1
CG1555	cgp1724	1091	1092	156	0	2752	3075	0.0269	-5.21625	0	564036	1	60	0	2.7
CG1556	mcmB	2213	2206	156	156	8202	5556	0.0227	-5.46116	0	2274471	2	149	0	3.4
CG1557	mcmA	1850	1851	0	312	5026	7143	0.0257	-5.28209	0	1.60766e+06	2	117	0.1	3.2
CG1558	cgp1727	776	777	0	156	2754	2206	0.0316	-4.98393	0	282069	1	53	0.1	3.4
CG1559	cgp1728	599	600	0	0	2999	946	0.0003	-11.7027	0	169800	0	35	0	2.9
CG156	tagA2	557	558	0	0	1838	1366	0.0003	-11.7027	0	144801	0	41	0	3.7
CG1560	cgp1730	1298	1299	0	0	3837	4013	0.0001	-13.2877	0	790442	0	83	0	3.2
CG1561	cgp1731	428	429	0	0	1589	1775	0.0003	-11.7027	3.4e-07	86872.5	0	26	0	3
CG1562	cgp1732	845	846	156	0	1300	2022	0.0472	-4.40507	0	341794	1	39	0.1	2.3
CG1563	cgp1733	785	786	0	0	2781	3088	0.0002	-12.2877	0	285318	0	61	0	3.9
CG1564	hemH	1112	1109	0	0	459	553	0.001	-9.96578	0.00132739	609950	0	9	0	0.4
CG1565	cgp1735	1892	1893	0	156	2864	3860	0.0233	-5.42353	0	1.70657e+06	1	91	0	2.4
CG1566	cgp1736	500	501	156	0	393	507	0.1743	-2.52036	0.00037119	122250	1	14	0.1	1.4
CG1567	acn	2831	2832	0	0	3	2	0.1667	-2.58467	0.012653	4003032	0	5	0	0.1
CG1568	acnR	566	567	0	0	375	132	0.002	-8.96578	4.878e-05	156492	0	17	0	1.5
CG1569	cgp1739	758	751	0	156	2619	1448	0.0386	-4.69526	0	268114	1	39	0.1	2.6
CG157	cgp0183	680	681	0	0	1318	2344	0.0003	-11.7027	0	218601	0	39	0	2.9
CG1570	cgp1740	665	666	0	0	3268	3304	0.0002	-12.2877	0	202131	0	61	0	4.6
CG1571	cgp1741	254	255	0	0	847	211	0.0009	-10.1178	7.568e-05	30727.5	0	14	0	2.7
CG1572	cgp1742	269	270	0	0	1067	1152	0.0005	-10.9658	4.67e-06	33885	0	20	0	3.7
CG1573	cgp1743	1388	1389	156	0	4300	3979	0.019	-5.71786	0	907730	1	84	0	3
CG1574	pacL	2678	2675	0	468	5280	5219	0.0447	-4.48358	0	3417434	3	123	0.1	2.3
CG1575	cgp1745	491	492	0	0	852	767	0.0006	-10.7027	3.6e-07	115128	0	24	0	2.4
CG1576	cgp1753	1631	1632	4674	0	2959	4403	0.6349	-0.655399	0	1.25179e+06	1	99	0	3
CG1577	cgp1754	1478	1479	0	0	5653	3199	0.0001	-13.2877	0	1035300	0	80	0	2.7
CG1578	nanH	1199	1200	156	0	4198	2078	0.025	-5.32193	0	678622	1	71	0	3
CG1579	tnp3b	710	711	0	0	0	0	1	0		252760	0	0	0	0
CG158	cgp0184	293	293	0	0	872	526	0.0007	-10.4804	1.462e-05	40434	0	17	0	2.9
CG1580	cgp1758	587	588	0	0	1194	1752	0.0003	-11.7027	0	162876	0	34	0	2.9
CG1581	cgp1759	413	414	623	0	0	135	4.5882	2.19793	0.283031	85492	1	2	0.1	0.2
CG1582	sufU	449	450	0	0	53	198	0.004	-7.96578	0.0415751	100575	0	4	0	0.4
CG1583	sufS	1265	1265	0	0	1	39	0.0244	-5.35698	0.0416119	798215	0	3	0	0.1
CG1584	sufC	758	759	0	0	1	1	0.3333	-1.58511	0.078718	287282	0	2	0	0.1
CG1585	sufD	1178	1179	0	0	0	1	0.5	-1	0.158861	694431	0	1	0	0
CG1586	sufB	1445	1446	0	0	0	0	1	0		1045458	0	0	0	0
CG1587	sufR	686	687	0	0	1755	2041	0.0003	-11.7027	0	224306	0	34	0	2.5
CG1588	cgp1766	1775	1776	0	0	483	516	0.001	-9.96578	0.00015222	1565544	0	13	0	0.4
CG1589	cgp1767	1022	1023	0	0	1487	1823	0.0003	-11.7027	0	498712	0	48	0	2.3
CG159	cgp0185	854	855	156	0	2242	1927	0.0376	-4.73312	0	342446	1	56	0.1	3.3
CG1590	cgp1768	806	807	0	0	1234	1278	0.0004	-11.2877	0	307064	0	47	0	2.9
CG1591	ctaA	1040	1041	0	0	46	155	0.005	-7.64386	0.00403407	538197	0	7	0	0.3
CG1592	cgp1770	2351	2352	156	0	5525	5843	0.0138	-6.17919	0	2614288	1	134	0	2.8
CG1593	qor3	968	969	0	0	7999	4308	0.0001	-13.2877	0	421515	0	101	0	5.2
CG1594	ctaB	932	933	0	0	442	135	0.0017	-9.20025	0.00132317	431046	0	9	0	0.5
CG1595	tkt	2102	2103	0	0	9	184	0.0052	-7.58727	0.00133799	2201841	0	9	0	0.2
CG1596	tal	1082	1083	0	0	4092	3940	0.0001	-13.2877	0	536626	0	93	0	4.3
CG1597	zwf	1544	1545	0	0	1291	1257	0.0004	-11.2877	0	1151025	0	55	0	1.8
CG1598	opcA	959	960	0	0	948	901	0.0005	-10.9658	0	444480	0	34	0	1.8
CG1599	pgl	707	708	0	0	188	116	0.0033	-8.24332	0.00229176	247800	0	8	0	0.6
CG16	cgpt5002	72	73	0	0	0	0	1	0		2664.5	0	0	0	0
CG160	cgp0186	344	345	0	0	2281	985	0.0003	-11.7027	1.8e-07	55200	0	25	0	3.6
CG1600	soxA	407	408	0	0	1272	1447	0.0004	-11.2877	4e-08	77520	0	28	0	3.4
CG1601	tnp13b	1403	1404	0	0	0	0	1	0		985608	0	0	0	0
CG1602	soxA'	842	843	0	156	2894	2188	0.0309	-5.01625	0	333842	1	52	0.1	3.1
CG1603	ocd	1148	1149	0	0	1599	3020	0.0002	-12.2877	0	631376	0	50	0	2.2
CG1604	amt	1358	1355	156	779	4950	3799	0.107	-3.22432	0	860491	2	88	0.1	3.2
CG1605	secG	233	234	0	0	1	0	0.5	-1	0.159692	27261	0	1	0	0.2
CG1606	ppc	2759	2760	0	0	10329	13990	0	#NUM!	0	3490020	0	234	0	4.2
CG1607	tpi	779	780	0	0	0	131	0.0076	-7.03978	0.0787162	303420	0	2	0	0.1
CG1608	pgk	1217	1218	0	0	0	5	0.1667	-2.58467	0.0786922	740544	0	2	0	0.1
CG1609	gap	1004	1005	0	0	24	4	0.0345	-4.85726	0.0126154	502500	0	5	0	0.2
CG161	cgp0187	893	894	0	0	1723	1277	0.0003	-11.7027	0	383079	0	37	0	2.1
CG1610	cgp1792	983	984	0	0	2	0	0.3333	-1.58511	0.0787023	483144	0	2	0	0.1
CG1611	cgp1793	1025	1026	0	0	6691	3139	0.0001	-13.2877	0	487863	0	76	0	3.7
CG1612	cgp1794	929	930	0	0	2689	3140	0.0002	-12.2877	0	398970	0	73	0	3.9
CG1613	uvrC	2090	2091	0	0	4578	3108	0.0001	-13.2877	0	2.06486e+06	0	117	0	2.8
CG1614	ribX	581	582	0	0	157	131	0.0035	-8.15843	0.0226574	168198	0	4	0	0.3
CG1615	ribH	479	480	0	0	3166	2096	0.0002	-12.2877	0	103440	0	49	0	5.1
CG1616	ribA	1268	1269	156	0	6250	8481	0.0107	-6.54625	0	728436	1	124	0	4.9
CG1617	ribC	635	636	0	0	1578	2139	0.0003	-11.7027	0	188574	0	43	0	3.4
CG1618	ribG	986	987	0	0	3309	3797	0.0001	-13.2877	0	456488	0	64	0	3.2
CG1619	rpe	659	660	0	0	121	0	0.0082	-6.93016	0.0787283	217140	0	2	0	0.2
CG162	cgp0188	908	905	0	0	3139	3082	0.0002	-12.2877	0	382362	0	63	0	3.5
CG1620	fmu	1535	1532	0	156	5430	9955	0.0102	-6.61529	0	1.06937e+06	1	144	0	4.7
CG1621	fmt	947	948	0	0	1	0	0.5	-1	0.158911	448878	0	1	0	0.1
CG1622	def2	509	510	0	156	762	2133	0.0542	-4.20556	0	121390	1	36	0.1	3.5
CG1623	priA	2066	2067	0	0	1	0	0.5	-1	0.158772	2135211	0	1	0	0
CG1624	metK	1223	1224	0	0	0	13	0.0714	-3.80793	0.0416113	747252	0	3	0	0.1
CG1625	dfp	1268	1269	0	0	1	63	0.0154	-6.02093	0.041612	803277	0	3	0	0.1
CG1626	cgp1809	287	288	0	0	17	200	0.0046	-7.76415	0.00392703	40464	0	7	0	1.2
CG1627	gmk	572	573	0	0	0	22	0.0435	-4.52284	0.159078	163878	0	1	0	0.1
CG1628	ihf	320	321	0	0	0	0	1	0		51520.5	0	0	0	0
CG1629	pyrF	836	837	0	0	2	146	0.0067	-7.22162	0.0126038	348192	0	5	0	0.3
CG163	cgp0191	431	432	779	0	2258	1332	0.2172	-2.2029	4e-08	86846.5	1	33	0.1	3.8
CG1630	carB	3341	3342	0	0	39	165	0.0049	-7.673	0.00026328	5564430	0	12	0	0.2
CG1631	carA	1181	1182	0	0	7	0	0.125	-3	0.15886	697971	0	1	0	0
CG1632	pyrC	1343	1344	0	0	0	11	0.0833	-3.58554	0.0416131	901152	0	3	0	0.1
CG1633	pyrB	938	939	0	0	0	259	0.0038	-8.03978	0.00230329	437104	0	8	0	0.4
CG1634	pyrR	578	579	0	0	1076	693	0.0006	-10.7027	9.62e-06	162410	0	18	0	1.6
CG1635	cgp1819	1526	1527	0	0	137	142	0.0036	-8.11779	0.00404722	1160520	0	7	0	0.2
CG1636	cgp1821	479	480	0	0	716	391	0.0009	-10.1178	9.34e-06	110880	0	18	0	1.9
CG1637	cgp1822	464	454	0	0	1367	430	0.0006	-10.7027	1.597e-05	99199	0	18	0	2
CG1638	cgp1823	188	189	0	0	277	26	0.0033	-8.24332	0.0123654	17388	0	5	0	1.3
CG1639	nusB	683	684	0	0	328	1402	0.0006	-10.7027	5e-08	224352	0	28	0	2
CG164	cgp0192	623	624	0	0	3526	2841	0.0002	-12.2877	0	183768	0	37	0	3
CG1640	efp	563	564	0	0	505	565	0.0009	-10.1178	6.4e-07	152562	0	23	0	2
CG1641	pepQ	1091	1092	0	156	4348	3742	0.0194	-5.6878	0	555299	1	78	0	3.6
CG1642	aroB	1097	1098	0	0	8	33	0.0238	-5.39289	0.0416088	601155	0	3	0	0.1
CG1643	aroK	557	558	0	0	383	44	0.0023	-8.76415	0.00705882	154008	0	6	0	0.5
CG1644	aroC	1223	1224	0	0	1	37	0.0256	-5.28771	0.078692	747864	0	2	0	0.1
CG1645	cgp1830	413	414	0	0	1158	425	0.0006	-10.7027	1.573e-05	82179	0	17	0	2.1
CG1646	cgp1831	305	306	0	0	1036	1045	0.0005	-10.9658	1e-07	42840	0	26	0	4.2
CG1647	cgp1832	1076	1077	156	0	5188	3784	0.0175	-5.8365	0	547127	1	64	0	3
CG1648	cgp1833	959	956	0	0	2466	1944	0.0002	-12.2877	0	428766	0	59	0	3.1
CG1649	cgp1834	755	756	0	0	1523	2358	0.0003	-11.7027	0	268758	0	45	0	3
CG165	pepO	1928	1929	0	156	6346	5015	0.0138	-6.17919	0	1754451	1	114	0	3
CG1650	aroE3	830	831	0	0	170	512	0.0015	-9.38082	0.00708967	342788	0	6	0	0.4
CG1651	cgp1836	1169	1166	0	312	1277	1030	0.1356	-2.88257	0	656492	2	42	0.1	1.8
CG1652	cgp1837	548	549	0	0	101	115	0.0046	-7.76415	0.0415854	149877	0	4	0	0.4
CG1653	alaS	2666	2667	0	0	1	265	0.0037	-8.07826	0.0227299	3.55111e+06	0	4	0	0.1
CG1654	cgp1839	1379	1380	0	312	7737	7291	0.0208	-5.58727	0	879791	1	110	0	4
CG1655	cgp1840	1199	1200	0	156	4315	3313	0.0206	-5.60121	0	682216	1	66	0	2.8
CG1656	aspS	1826	1827	0	0	339	83	0.0024	-8.70275	0.00077274	1.65983e+06	0	10	0	0.3
CG1657	cgp1842	893	894	0	0	2690	2156	0.0002	-12.2877	0	373692	0	59	0	3.3
CG1658	cgp1843	2660	2661	312	0	13542	8738	0.014	-6.15843	0	3281109	2	201	0	3.8
CG1659	cgp1844	1859	1859	156	0	7794	6761	0.0108	-6.53282	0	1606212	1	135	0	3.6
CG166	cgp0194	743	744	0	0	2856	3237	0.0002	-12.2877	0	254076	0	63	0	4.2
CG1660	cgp1845	650	651	0	0	2882	2746	0.0002	-12.2877	0	198880	0	41	0	3.1
CG1661	cgp1846	596	580	0	156	1826	2039	0.0406	-4.62238	0	154298	1	50	0.1	4.3
CG1662	cgp1847	716	717	0	0	2070	1974	0.0002	-12.2877	0	240195	0	49	0	3.4
CG1663	cgp1848	1115	1116	156	0	3486	4978	0.0185	-5.75633	0	578669	1	82	0	3.7
CG1664	cgp1849	128	129	0	0	333	564	0.0011	-9.82828	0.00020228	7546.5	0	12	0	4.7
CG1665	cgp1850	497	498	0	0	1587	2309	0.0003	-11.7027	0	112548	0	48	0	4.8
CG1666	cgp1852	1349	1346	156	0	6680	4206	0.0144	-6.11779	0	843290	1	96	0	3.6
CG1667	glpD	1688	1689	156	0	8341	5556	0.0113	-6.46753	0	1336027	1	109	0	3.2
CG1668	hisS	1289	1290	0	0	0	2	0.3333	-1.58511	0.158843	831405	0	1	0	0
CG1669	cgp1856	641	642	0	0	2516	1611	0.0002	-12.2877	0	193242	0	44	0	3.4
CG167	cgp0195	965	962	0	0	2614	3776	0.0002	-12.2877	0	429533	0	71	0	3.7
CG1670	ppiB	842	843	0	0	886	1737	0.0004	-11.2877	0	336778	0	44	0	2.6
CG1671	cgp1859	557	558	156	0	1855	0	0.0846	-3.5632	8.61e-06	150110	1	21	0.1	1.9
CG1672	cgp1860	275	276	0	0	237	178	0.0024	-8.70275	0.00071855	36708	0	10	0	1.8
CG1673	cgp1861	2282	2283	0	156	2798	6198	0.0175	-5.8365	0	2483936	1	108	0	2.4
CG1674	apt	557	558	0	0	1209	1514	0.0004	-11.2877	0	146196	0	35	0	3.1
CG1675	dciAE	1601	1602	0	312	3896	4520	0.0372	-4.74855	0	1207151	1	101	0	3.2
CG1676	secF	1211	1212	0	0	2661	2585	0.0002	-12.2877	0	693264	0	68	0	2.8
CG1677	secD	1913	1914	0	0	4043	2662	0.0001	-13.2877	0	1746525	0	93	0	2.4
CG1678	secN	365	366	0	0	1160	600	0.0006	-10.7027	8.86e-06	63684	0	18	0	2.5
CG1679	cgp1869	1091	1092	0	0	300	345	0.0015	-9.38082	2.991e-05	587496	0	16	0	0.7
CG168	iolR	761	762	0	0	1745	978	0.0004	-11.2877	0	273939	0	43	0	2.8
CG1680	ruvA	620	621	0	0	127	188	0.0032	-8.28771	0.0040062	190647	0	7	0	0.6
CG1681	ruvC	665	666	0	0	330	421	0.0013	-9.58727	4.95e-05	216783	0	15	0	1.1
CG1682	cgp1872	755	756	0	0	79	259	0.0029	-8.42973	0.0125963	283878	0	6	0	0.4
CG1683	tesB2	848	849	0	0	1354	2893	0.0002	-12.2877	0	342996	0	41	0	2.4
CG1684	cgp1874	476	477	0	0	1704	1149	0.0004	-11.2877	2.1e-07	107802	0	25	0	2.6
CG1685	cgp1875	464	465	0	0	515	213	0.0014	-9.48036	0.0022674	106252	0	8	0	0.9
CG1686	cgp1876	1085	1082	0	0	2	3	0.1667	-2.58467	0.0416085	583739	0	3	0	0.1
CG1687	cgp1877	965	966	0	0	2002	1966	0.0003	-11.7027	0	438564	0	58	0	3
CG1688	pgsA1	659	659	0	0	19	63	0.012	-6.38082	0.0226682	215822	0	4	0	0.3
CG1689	cgp1879	638	639	0	0	1595	2453	0.0002	-12.2877	0	192658	0	38	0	3
CG169	iolC	956	957	156	0	2649	4971	0.0206	-5.60121	0	424928	1	71	0.1	3.7
CG1690	thrS	2102	2103	0	0	219	0	0.0045	-7.79586	0.04162	2208150	0	3	0	0.1
CG1691	cgp1881	1208	1209	0	0	508	740	0.0008	-10.2877	1.5e-07	715124	0	27	0	1.1
CG1692	cgp1883	548	549	0	156	749	661	0.1113	-3.16747	2.506e-05	145765	1	19	0.1	1.7
CG1693	cgp1884	614	615	0	0	7	0	0.125	-3	0.078734	188498	0	2	0	0.2
CG1694	cgpt5035	75	76	0	0	0	0	1	0		2888	0	0	0	0
CG1695	cgpt5036	74	75	0	0	0	0	1	0		2812.5	0	0	0	0
CG1696	cgpt5037	70	71	0	0	0	0	1	0		2520.5	0	0	0	0
CG1697	cgpt5038	72	73	0	0	0	0	1	0		2664.5	0	0	0	0
CG1698	cgpt5039	74	75	0	0	0	0	1	0		2812.5	0	0	0	0
CG1699	cgpt5040	72	73	0	0	0	0	1	0		2664.5	0	0	0	0
CG17	cgp0018	1037	1038	0	0	1655	2694	0.0002	-12.2877	0	512253	0	53	0	2.6
CG170	cgp0198	923	924	0	0	633	891	0.0007	-10.4804	0	411180	0	34	0	1.8
CG1700	cgp2072	308	309	0	0	822	525	0.0007	-10.4804	4.493e-05	45423	0	15	0	2.4
CG1701	cgp2073	359	360	0	0	574	682	0.0008	-10.2877	5.09e-06	61380	0	19	0	2.6
CG1702	cgp2074	347	348	0	0	248	654	0.0011	-9.82828	0.00041929	58638	0	11	0	1.6
CG1703	cgp2075	338	339	0	0	608	707	0.0008	-10.2877	1.513e-05	54579	0	17	0	2.5
CG1704	ribD	698	699	0	0	2032	3317	0.0002	-12.2877	0	226126	0	52	0	3.7
CG1705	cgp2077	1256	1257	0	0	868	1265	0.0005	-10.9658	0	762370	0	44	0	1.8
CG1706	cgp2078	410	407	0	0	1863	2215	0.0002	-12.2877	0	75905.5	0	36	0	4.4
CG1707	cgp2079	698	699	0	0	0	1	0.5	-1	0.159002	243951	0	1	0	0.1
CG1708	cgp2080	617	618	0	0	492	92	0.0017	-9.20025	3.3e-06	184782	0	20	0	1.6
CG1709	rnd	1211	1212	0	0	3262	3686	0.0001	-13.2877	0	687204	0	79	0	3.3
CG171	iolA	1514	1515	156	0	4551	5640	0.0154	-6.02093	0	1061295	1	116	0	3.8
CG1710	dxs	1910	1911	0	312	3	188	1.6302	0.705049	0.016928	1820231	1	7	0	0.2
CG1711	cgp2084	1238	1239	0	156	4856	4477	0.0168	-5.89539	0	709356	1	99	0	4
CG1712	cgp2085	863	864	156	0	1982	2167	0.0378	-4.72547	0	352095	1	53	0.1	3.1
CG1713	dut	449	450	0	0	0	1	0.5	-1	0.159194	101025	0	1	0	0.1
CG1714	cgp2087	551	552	0	0	59	51	0.009	-6.79586	0.0125677	150972	0	5	0	0.5
CG1715	cgp2088	209	210	0	0	408	304	0.0014	-9.48036	0.00123407	21105	0	9	0	2.1
CG1716	cgp2089	293	294	156	0	834	2021	0.055	-4.18442	4.18e-06	40135	1	22	0.2	3.7
CG1717	suhB	842	843	156	0	2997	4340	0.0214	-5.54625	0	330468	1	61	0.1	3.6
CG1718	ppgK	752	753	0	0	1830	1172	0.0003	-11.7027	0	267692	0	42	0	2.8
CG1719	sigA	1484	1485	0	0	1	19	0.0476	-4.39289	0.0416149	1100385	0	3	0	0.1
CG172	iolB	890	891	0	0	4477	2956	0.0001	-13.2877	0	363974	0	75	0	4.2
CG1720	cgp2093	167	168	0	0	1	0	0.5	-1	0.1601	14028	0	1	0	0.3
CG1721	cgp2094	104	105	0	0	138	185	0.0031	-8.33352	0.0222369	5302.5	0	4	0	1.9
CG1722	cgp2095	1406	1407	0	52192	3374	5503	5.8789	2.55555	0	939912	1	73	0	2.6
CG1723	cgp2096	539	540	0	0	1318	1354	0.0004	-11.2877	0	136350	0	35	0	3.2
CG1724	cgp2097	1712	1713	0	0	23	46	0.0143	-6.12784	0.0126395	1462902	0	5	0	0.1
CG1725	cgp2098	239	236	0	0	551	413	0.001	-9.96578	0.00022946	26432	0	12	0	2.5
CG1726	cgp2099	497	484	0	156	842	1366	0.0711	-3.81401	1.65e-06	111569	1	24	0.1	2.5
CG1727	cgp2100	1535	1536	156	156	6835	7496	0.0218	-5.51953	0	1103659	2	101	0.1	3.3
CG1728	cgp2101	434	435	0	0	909	2180	0.0003	-11.7027	1e-08	88087.5	0	30	0	3.4
CG1729	sigB	995	996	0	0	2501	865	0.0003	-11.7027	0	472104	0	48	0	2.4
CG173	iolD	1913	1914	0	0	10934	7803	0.0001	-13.2877	0	1695804	0	144	0	3.8
CG1730	dtxR	686	687	0	0	3298	2524	0.0002	-12.2877	0	216748	0	56	0	4.1
CG1731	galE	989	990	0	0	3625	2162	0.0002	-12.2877	0	454905	0	72	0	3.6
CG1732	cgp2105	1133	1130	0	0	1452	3371	0.0002	-12.2877	0	605115	0	60	0	2.7
CG1733	cgp2106	959	960	0	0	2206	2072	0.0002	-12.2877	0	441120	0	42	0	2.2
CG1734	cgp2107	2540	2541	0	0	5052	3657	0.0001	-13.2877	0	3079692	0	119	0	2.3
CG1735	oxyR	983	984	0	0	972	509	0.0007	-10.4804	0	466908	0	35	0	1.8
CG1736	cgp2110	1091	1092	156	467	2996	2696	0.1096	-3.18968	0	562429	2	66	0.1	3
CG1737	cgp2111	3908	3909	0	0	7700	7759	0.0001	-13.2877	0	7247286	0	210	0	2.7
CG1738	nrdR	452	453	0	0	1192	1149	0.0004	-11.2877	2e-07	96942	0	25	0	2.8
CG1739	cgp2113	422	423	0	0	870	293	0.0009	-10.1178	5.29e-06	85446	0	19	0	2.2
CG174	iolE	956	957	156	0	3534	4696	0.0191	-5.71028	0	415367	1	94	0.1	4.9
CG1740	lexA	761	762	0	0	475	3	0.0021	-8.89539	0.00025422	285750	0	12	0	0.8
CG1741	sugR	779	780	0	0	33	4	0.0263	-5.24879	0.0415993	303030	0	3	0	0.2
CG1742	cgp2116	962	959	0	0	2688	1921	0.0002	-12.2877	0	430591	0	62	0	3.2
CG1743	ptsI	1706	1707	0	0	750	1003	0.0006	-10.7027	2e-08	1.43132e+06	0	31	0	0.9
CG1744	cgp2118	794	795	0	156	1589	2421	0.0391	-4.67669	1e-08	302505	1	37	0.1	2.3
CG1745	fruK	992	985	0	0	1365	880	0.0004	-11.2877	0	464920	0	41	0	2.1
CG1746	ptsF	2066	2067	0	0	1629	915	0.0004	-11.2877	0	2077335	0	57	0	1.4
CG1747	ptsH	269	270	0	312	55	102	1.981	0.986229	0.029344	35778	1	7	0.2	1.3
CG1748	cgp2124	527	528	0	0	1128	1821	0.0003	-11.7027	0	129096	0	41	0	3.9
CG1749	uraA	1283	1284	0	0	4077	4571	0.0001	-13.2877	0	770400	0	86	0	3.3
CG175	iolG	1013	1014	0	0	3249	5211	0.0001	-13.2877	0	475059	0	81	0	4
CG1750	cgp2126	1460	1461	0	0	4193	3865	0.0001	-13.2877	0	991288	0	104	0	3.6
CG1751	cgp2127	758	759	0	0	88	22	0.009	-6.79586	0.00708367	285764	0	6	0	0.4
CG1752	cgp2128	539	536	156	0	1670	1639	0.0474	-4.39897	1.1e-07	136148	1	30	0.1	2.8
CG1753	cgp2129	833	834	0	0	0	391	0.0026	-8.58727	0.0787118	346944	0	2	0	0.1
CG1754	miaA	905	906	0	0	125	142	0.0037	-8.07826	0.00014889	404529	0	13	0	0.7
CG1755	cgp2131	611	612	0	156	778	2184	0.053	-4.23786	0	176268	1	39	0.1	3.2
CG1756	cgp2132	1361	1362	0	0	4667	4451	0.0001	-13.2877	0	872361	0	81	0	3
CG1757	cgp2133	1025	1026	0	1714	4385	3221	0.2255	-2.1488	0	493026	1	67	0	3.3
CG1758	cgp2134	671	672	0	0	487	296	0.0013	-9.58727	8.515e-05	221088	0	14	0	1
CG1759	cgp2135	1580	1581	0	156	5329	5119	0.015	-6.05889	0	1163645	1	111	0	3.5
CG176	iolH	878	879	156	0	1952	2898	0.0324	-4.94786	0	359969	1	61	0.1	3.5
CG1760	cgp2136	752	753	0	0	1991	1146	0.0003	-11.7027	0	270704	0	36	0	2.4
CG1761	gluB	887	888	312	0	3408	3365	0.0462	-4.43596	0	362346	2	74	0.1	4.2
CG1762	gluC	686	687	0	0	2942	1771	0.0002	-12.2877	0	224306	0	34	0	2.5
CG1763	gluD	947	947	0	0	3289	1840	0.0002	-12.2877	0	421415	0	58	0	3.1
CG1764	recX	647	648	0	0	905	453	0.0007	-10.4804	1.3e-07	201528	0	26	0	2
CG1765	recA	1130	1131	0	0	137	665	0.0012	-9.70275	5.121e-05	631098	0	15	0	0.7
CG1766	cgp2145	215	216	0	0	221	974	0.0008	-10.2877	0.00070145	22248	0	11	0	2.5
CG1767	cgp2146	680	681	0	0	1707	1466	0.0003	-11.7027	3e-08	222006	0	30	0	2.2
CG1768	cgp2147	605	606	0	0	375	308	0.0015	-9.38082	0.0415898	182709	0	3	0	0.2
CG1769	cgp2148	701	702	0	0	1	14	0.0625	-4	0.0787236	245700	0	2	0	0.1
CG177	iolP	1376	1377	156	467	4198	5260	0.066	-3.92139	0	887544	2	91	0.1	3.3
CG1770	cgp2149	611	608	0	0	0	0	1	0		184832	0	0	0	0
CG1771	cgp2151	830	831	0	0	809	1536	0.0004	-11.2877	0	331569	0	33	0	2
CG1772	clgR	323	324	0	0	1	44	0.0217	-5.52616	0.0788099	52164	0	2	0	0.3
CG1773	cgp2153	518	519	0	0	870	2161	0.0003	-11.7027	1.86e-06	129231	0	21	0	2
CG1774	pgsA2	605	606	0	0	155	289	0.0022	-8.82828	0.00025126	179982	0	12	0	1
CG1775	cgp2155	287	288	0	0	729	260	0.001	-9.96578	0.00013501	39600	0	13	0	2.3
CG1776	cgp2156	119	120	0	0	473	34	0.002	-8.96578	0.0223009	6960	0	4	0	1.7
CG1777	terC	1109	1110	0	312	592	304	0.3489	-1.51911	0.0011202	609950	1	12	0	0.5
CG1778	ftsK	3032	3033	0	0	247	797	0.001	-9.96578	5.28e-05	4576797	0	15	0	0.2
CG1779	cgp2159	635	636	0	0	1398	1580	0.0003	-11.7027	0	190800	0	36	0	2.8
CG178	cgp0207	1025	1026	312	0	3883	4177	0.0388	-4.6878	0	489434	1	75	0	3.7
CG1780	cgp2160	2156	2157	0	0	409	337	0.0013	-9.58727	0.00015284	2312304	0	13	0	0.3
CG1781	dapA	905	906	0	0	0	0	1	0		410418	0	0	0	0
CG1782	thyX	752	753	0	0	1485	2178	0.0003	-11.7027	0	267692	0	42	0	2.8
CG1783	dapB	746	747	0	0	606	368	0.001	-9.96578	0.0022942	276016	0	8	0	0.5
CG1784	cgp2165	701	702	0	0	1719	1944	0.0003	-11.7027	0	230256	0	49	0	3.5
CG1785	gpsI	2261	2262	0	0	151	668	0.0012	-9.70275	2.7e-07	2530047	0	25	0	0.6
CG1786	cgp2167	269	270	0	0	0	0	1	0		36450	0	0	0	0
CG1787	iunH2	950	951	0	0	5566	5337	0.0001	-13.2877	0	404175	0	102	0	5.4
CG1788	ribF	1025	1026	0	0	2	158	0.0062	-7.33352	0.0126166	523773	0	5	0	0.2
CG1789	truB	893	894	0	0	1739	2510	0.0002	-12.2877	0	376821	0	52	0	2.9
CG179	cgp0208	458	459	0	0	2678	2522	0.0002	-12.2877	0	95472	0	43	0	4.7
CG1790	pptA	653	643	0	156	1	199	0.7811	-0.356421	0.282003	206403	1	2	0.1	0.2
CG1791	cgp2172	806	807	0	156	563	993	0.1008	-3.31043	1.83e-06	316353	1	24	0.1	1.5
CG1792	dinF	1313	1300	0	156	3707	3869	0.0207	-5.59423	0	801465	1	69	0	2.7
CG1793	cgp2174	998	999	0	0	1349	1369	0.0004	-11.2877	0	473526	0	51	0	2.6
CG1794	rbfA	449	450	0	0	186	214	0.0025	-8.64386	0.0125438	100125	0	5	0	0.6
CG1795	cgp2176	3014	3015	0	0	2	59	0.0161	-5.9568	0.00713547	4.53607e+06	0	6	0	0.1
CG1796	cgp2177	338	339	0	0	472	121	0.0017	-9.20025	0.00127727	55935	0	9	0	1.3
CG1797	nusA	998	999	0	0	0	0	1	0		499000	0	0	0	0
CG1798	cgp2179	536	537	0	0	195	124	0.0031	-8.33352	0.00024941	140962	0	12	0	1.1
CG1799	cgp2180	818	819	468	0	3606	3106	0.0699	-3.83856	0	311666	2	62	0.1	3.8
CG18	cgp0019	896	897	0	0	2657	2270	0.0002	-12.2877	0	377637	0	57	0	3.2
CG180	cgp0209	347	348	0	0	1558	1056	0.0004	-11.2877	5.5e-07	56550	0	23	0	3.3
CG1800	cgp2181	1604	1605	0	0	5151	5838	0.0001	-13.2877	0	1194120	0	119	0	3.7
CG1801	cgp2182	926	919	0	0	2845	2338	0.0002	-12.2877	0	394710	0	63	0	3.4
CG1802	cgp2183	1034	1031	0	156	1804	3207	0.0313	-4.99769	0	499543	1	65	0	3.2
CG1803	cgp2184	1733	1734	0	0	5369	4339	0.0001	-13.2877	0	1413210	0	106	0	3.1
CG1804	proS	1766	1767	0	0	2	1	0.25	-2	0.078679	1.55938e+06	0	2	0	0.1
CG1805	cgp2186	737	734	0	0	2624	2742	0.0002	-12.2877	0	252863	0	48	0	3.3
CG1806	cgp2187	761	762	0	0	1349	1793	0.0003	-11.7027	0	275082	0	41	0	2.7
CG1807	cgp2188	1103	1104	468	0	3904	3706	0.0616	-4.02093	0	573567	3	68	0.1	3.1
CG1808	cysG	752	753	0	0	0	484	0.0021	-8.89539	0.0787185	282752	0	2	0	0.1
CG1809	cgp2190	1424	1425	0	0	4847	4413	0.0001	-13.2877	0	944062	0	102	0	3.6
CG181	cgp0210	995	996	0	312	3615	2776	0.049	-4.35107	0	463665	1	66	0.1	3.3
CG1810	cgp2191	902	903	0	0	1891	1523	0.0003	-11.7027	0	390999	0	37	0	2
CG1811	mqo	1502	1503	0	468	1694	1060	0.1702	-2.5547	0	1086725	2	60	0.1	2
CG1812	cgp2193	1025	1026	0	0	4779	4991	0.0001	-13.2877	0	480168	0	92	0	4.5
CG1813	mtr	1397	1398	156	0	5490	3727	0.017	-5.87832	0	915712	1	92	0	3.3
CG1814	cgp2195	476	477	0	0	848	621	0.0007	-10.4804	5.42e-06	109233	0	19	0	2
CG1815	cgp2196	359	360	156	0	433	78	0.3066	-1.70557	0.0293557	63903	1	6	0.1	0.8
CG1816	cgp2197	731	728	0	0	1286	1486	0.0004	-11.2877	5e-08	254800	0	28	0	1.9
CG1817	map2	875	876	0	0	0	0	1	0		383688	0	0	0	0
CG1818	pbp	1868	1869	0	156	5790	6336	0.0129	-6.27649	0	1658762	1	97	0	2.6
CG1819	cgp2200	632	629	0	0	1235	2805	0.0002	-12.2877	0	183982	0	45	0	3.6
CG182	cgp0211	1235	1236	0	0	3923	4561	0.0001	-13.2877	0	716880	0	79	0	3.2
CG1820	cgp2201	1133	1134	0	0	676	1574	0.0004	-11.2877	0	619731	0	41	0	1.8
CG1821	cgp2202	959	960	0	0	3141	3673	0.0001	-13.2877	0	433920	0	56	0	2.9
CG1822	cgp2204	692	693	0	0	749	1890	0.0004	-11.2877	2.3e-07	231462	0	25	0	1.8
CG1823	ispG	1211	1212	0	0	0	119	0.0083	-6.91267	0.041611	732654	0	3	0	0.1
CG1824	cgp2207	1214	1215	0	0	2111	3143	0.0002	-12.2877	0	697410	0	68	0	2.8
CG1825	dxr	1169	1170	0	0	0	1	0.5	-1	0.158862	683865	0	1	0	0
CG1826	cgp2211	443	444	0	0	1218	385	0.0006	-10.7027	9.22e-06	94572	0	19	0	2.1
CG1827	cgp2212	1580	1581	156	0	2289	3071	0.0293	-5.09296	0	1183410	1	86	0	2.7
CG1828	cgp2213	857	858	0	0	1937	2100	0.0002	-12.2877	0	350493	0	43	0	2.5
CG1829	cgp2214	1100	1101	0	0	2815	5167	0.0001	-13.2877	0	558207	0	89	0	4
CG183	cgp0212	1013	1014	0	0	2106	3460	0.0002	-12.2877	0	487734	0	52	0	2.6
CG1830	cgp2215	500	501	0	0	1277	631	0.0005	-10.9658	6.2e-07	119739	0	24	0	2.4
CG1831	cdsA	893	894	0	0	0	6	0.1429	-2.80692	0.158926	399171	0	1	0	0.1
CG1832	frr	557	558	0	0	0	0	1	0		155682	0	0	0	0
CG1833	pyrH	731	732	0	0	0	180	0.0055	-7.50635	0.158986	267546	0	1	0	0.1
CG1834	tsf	827	828	0	0	1	372	0.0027	-8.53282	0.012603	340722	0	5	0	0.3
CG1835	rpsB	818	819	0	0	0	0	1	0		335380	0	0	0	0
CG1836	cgp2223	482	483	0	156	2850	1448	0.0365	-4.77596	0	108442	1	37	0.1	3.8
CG1837	xerC	947	944	0	0	350	240	0.0017	-9.20025	5.072e-05	438488	0	15	0	0.8
CG1838	cgp2226	1184	1185	0	0	3086	3141	0.0002	-12.2877	0	659452	0	72	0	3
CG1839	cgp2227	1523	1520	156	156	4876	4083	0.0349	-4.84063	0	1086095	2	94	0.1	3.1
CG184	cgp0214	431	432	0	0	518	691	0.0008	-10.2877	5.31e-06	89208	0	19	0	2.2
CG1840	cgp2228	368	355	0	0	588	309	0.0011	-9.82828	0.00073247	61237.5	0	11	0	1.5
CG1841	cgp2229	305	302	0	0	311	404	0.0014	-9.48036	0.00023708	43790	0	12	0	2
CG1842	rnhB	668	669	156	0	1947	862	0.0559	-4.16101	3.5e-07	215090	1	27	0.1	2
CG1843	lepB	788	789	0	0	5	0	0.1667	-2.58467	0.158962	310866	0	1	0	0.1
CG1844	cgp2234	944	945	0	0	1195	784	0.0005	-10.9658	0	427140	0	41	0	2.2
CG1845	rplS	341	342	0	0	0	0	1	0		58482	0	0	0	0
CG1846	thiE	665	662	0	0	2750	2316	0.0002	-12.2877	0	203234	0	49	0	3.7
CG1847	thiO	1124	1125	156	0	4236	3973	0.0191	-5.71028	0	596262	1	68	0	3
CG1848	thiS	197	198	0	0	1334	160	0.0007	-10.4804	4.054e-05	18117	0	15	0	3.8
CG1849	thiG	782	783	0	0	2517	3905	0.0002	-12.2877	0	286186	0	54	0	3.4
CG185	cspA	203	204	0	0	763	430	0.0008	-10.2877	0.00039507	19686	0	11	0	2.7
CG1850	thiF	1076	1077	0	0	1844	2596	0.0002	-12.2877	0	549270	0	58	0	2.7
CG1851	tex	2276	2277	0	156	5466	4089	0.0164	-5.93016	0	2467164	1	114	0	2.5
CG1852	cgp2242	977	978	0	156	2528	2778	0.0296	-5.07826	0	454782	1	49	0.1	2.5
CG1853	cgp2243	1331	1332	0	0	2766	4519	0.0001	-13.2877	0	832500	0	82	0	3.1
CG1854	cgp2244	1253	1254	0	156	3804	2961	0.0232	-5.42973	0	743642	1	69	0	2.8
CG1855	cgp2247	371	372	0	0	387	495	0.0011	-9.82828	4.633e-05	66402	0	15	0	2
CG1856	cgp2248	692	693	0	0	1440	572	0.0005	-10.9658	0	226958	0	39	0	2.8
CG1857	trmD	869	866	0	0	304	0	0.0033	-8.24332	0.0416026	373679	0	3	0	0.2
CG1858	cgp2250	650	651	156	0	2197	2244	0.0353	-4.82419	0	200191	1	37	0.1	2.8
CG1859	rimM	515	512	0	0	1	63	0.0154	-6.02093	0.041582	130304	0	3	0	0.3
CG186	cgp0216	536	537	0	0	1131	686	0.0006	-10.7027	5.53e-06	139083	0	19	0	1.8
CG1860	cgp2252	350	351	0	0	632	1084	0.0006	-10.7027	5.5e-07	57564	0	23	0	3.3
CG1861	rpsP	497	498	0	0	1	143	0.0069	-7.17919	0.0125563	122757	0	5	0	0.5
CG1862	cgp2254	476	477	0	0	2483	1948	0.0002	-12.2877	0	103748	0	42	0	4.4
CG1863	cgp2255	869	866	0	0	657	1197	0.0005	-10.9658	4.1e-07	364586	0	24	0	1.4
CG1864	cgp2256	878	879	0	0	4163	2660	0.0001	-13.2877	0	363906	0	53	0	3
CG1865	srp	1643	1644	0	0	164	160	0.0031	-8.33352	0.00077164	1343148	0	10	0	0.3
CG1866	glnD	2078	2079	2493	0	8642	10042	0.1335	-2.90509	0	2035448	2	124	0	3
CG1867	glnK	338	339	0	0	1346	1447	0.0004	-11.2877	5.5e-07	53562	0	24	0	3.5
CG1868	amtB	1316	1317	0	623	2915	3824	0.0926	-3.43284	0	823158	1	68	0	2.6
CG1869	cgp2262	1730	1731	0	0	0	0	1	0		1.49818e+06	0	0	0	0
CG187	cgp0217	308	305	0	0	323	515	0.0012	-9.70275	0.00041436	44835	0	11	0	1.8
CG1870	cgp2263	3374	3375	312	0	6964	6968	0.0225	-5.47393	0	5.3782e+06	2	194	0	2.9
CG1871	cgp2265	3467	3468	156	312	6648	7336	0.0335	-4.8997	0	5741393	2	160	0	2.3
CG1872	cgp2266	284	285	0	0	855	682	0.0007	-10.4804	2.72e-06	37762.5	0	20	0	3.5
CG1873	cgp2267	1838	1839	0	0	3275	4526	0.0001	-13.2877	0	1.59717e+06	0	104	0	2.8
CG1874	cgp2268	860	861	0	0	3416	2341	0.0002	-12.2877	0	350427	0	47	0	2.7
CG1875	cgp2269	809	810	0	0	2067	2809	0.0002	-12.2877	0	309420	0	47	0	2.9
CG1876	cgp2270	449	450	0	0	1841	1720	0.0003	-11.7027	1e-08	94500	0	30	0	3.3
CG1877	cgp2271	617	618	0	0	1351	1129	0.0004	-11.2877	1e-08	181074	0	32	0	2.6
CG1878	mutM1	833	834	0	0	2106	1744	0.0003	-11.7027	0	327762	0	52	0	3.1
CG1879	rnc	743	740	0	0	314	693	0.001	-9.96578	6.8e-07	265290	0	23	0	1.6
CG188	cgp0218	416	417	0	0	283	550	0.0012	-9.70275	0.00014117	84234	0	13	0	1.6
CG1880	cgp2274	536	537	0	0	889	106	0.001	-9.96578	1.637e-05	139620	0	17	0	1.6
CG1881	cgp2275	791	792	0	0	1281	1002	0.0004	-11.2877	1.4e-07	303336	0	26	0	1.6
CG1882	cgp2277	1625	1626	156	0	4238	4507	0.018	-5.79586	0	1.24392e+06	1	97	0	3
CG1883	cgp2279	1532	1529	0	156	5773	4912	0.0147	-6.08804	0	1083328	1	113	0	3.7
CG1884	gdh	1343	1344	0	0	543	2887	0.0003	-11.7027	0	870240	0	52	0	1.9
CG1885	glxK	1124	1121	156	0	2342	2192	0.0346	-4.85308	0	599191	1	55	0	2.5
CG1886	cgp2283	398	399	779	0	317	927	0.6265	-0.674614	0.00045332	76821.5	2	16	0.3	2
CG1887	galT	1328	1329	0	156	3689	3853	0.0208	-5.58727	0	835963	1	72	0	2.7
CG1888	cgp2285	1265	1266	156	156	3632	2068	0.0549	-4.18705	0	763436	2	62	0.1	2.4
CG1889	cgp2286	338	335	0	0	787	959	0.0006	-10.7027	3.1e-07	52092.5	0	25	0	3.7
CG189	cgp0219	137	138	0	0	388	229	0.0016	-9.28771	0.00117651	8901	0	9	0	3.3
CG1890	cgp2287	116	117	0	0	112	93	0.0049	-7.673	0.0222894	6610.5	0	4	0	1.7
CG1891	cgp2288	278	279	0	0	299	306	0.0017	-9.20025	0.00071922	37525.5	0	10	0	1.8
CG1892	glgP2	2552	2553	0	468	10614	9016	0.0239	-5.38685	0	3044601	3	176	0.1	3.4
CG1893	cgp2290	902	903	0	0	2545	3583	0.0002	-12.2877	0	381969	0	57	0	3.2
CG1894	pyk	1427	1428	0	0	210	864	0.0009	-10.1178	1.5e-07	1001028	0	26	0	0.9
CG1895	lgt	950	951	0	0	560	377	0.0011	-9.82828	0.00014921	446019	0	13	0	0.7
CG1896	cgp2293	785	786	0	0	2081	1975	0.0002	-12.2877	0	294750	0	36	0	2.3
CG1897	cgp2294	659	660	0	0	0	285	0.0035	-8.15843	0.159022	217470	0	1	0	0.1
CG1898	cgp2296	356	357	0	0	1011	2128	0.0003	-11.7027	3.2e-07	59440.5	0	24	0	3.4
CG1899	hisF	776	773	0	0	1146	1191	0.0004	-11.2877	0	286010	0	33	0	2.1
CG19	cgp0021	422	423	0	0	356	838	0.0008	-10.2877	3.06e-06	85234.5	0	20	0	2.4
CG190	cgp0220	428	429	0	0	119	397	0.0019	-9.03978	0.00397543	90519	0	7	0	0.8
CG1900	impA	827	828	156	0	1563	2394	0.0397	-4.65472	0	324174	1	47	0.1	2.8
CG1901	hisA	740	741	0	0	1926	1775	0.0003	-11.7027	0	258980	0	44	0	3
CG1902	hisH	635	636	0	156	6541	5744	0.0128	-6.28771	0	187313	1	48	0.1	3.8
CG1903	cgp2301	1316	1317	0	0	3111	3237	0.0002	-12.2877	0	825100	0	65	0	2.5
CG1904	cgp2302	227	228	0	0	80	490	0.0018	-9.11779	0.00124294	24966	0	9	0	2
CG1905	hisB	608	609	156	156	4102	3171	0.043	-4.53952	0	170844	2	53	0.2	4.4
CG1906	hisC	1100	1101	0	312	2989	4133	0.0439	-4.50964	0	567049	1	75	0	3.4
CG1907	hisD	1328	1329	0	0	4820	5341	0.0001	-13.2877	0	826638	0	89	0	3.3
CG1908	cgp2306	1202	1203	0	0	1623	1697	0.0003	-11.7027	0	692326	0	52	0	2.2
CG1909	cgp2307	653	654	0	0	2833	1426	0.0002	-12.2877	0	201105	0	39	0	3
CG191	cgp0221	992	993	0	0	1540	2111	0.0003	-11.7027	0	469689	0	50	0	2.5
CG1910	cgp2308	644	645	0	0	579	867	0.0007	-10.4804	1.94e-06	201240	0	21	0	1.6
CG1911	cgp2309	563	564	0	156	1315	1138	0.064	-3.96578	7e-08	150880	1	32	0.1	2.8
CG1912	glgX	2510	2511	0	0	7428	5229	0.0001	-13.2877	0	2.94917e+06	0	163	0	3.2
CG1913	cgp2311	803	804	0	0	3305	2110	0.0002	-12.2877	0	302706	0	54	0	3.4
CG1914	gip	776	777	0	0	2258	2062	0.0002	-12.2877	0	283605	0	49	0	3.2
CG1915	idhA3	1013	1014	0	467	4007	4805	0.0531	-4.23514	0	479146	1	73	0	3.6
CG1916	cgp2314	998	999	0	0	2547	2024	0.0002	-12.2877	0	475524	0	50	0	2.5
CG1917	cgp2315	731	732	0	0	754	1581	0.0004	-11.2877	1.4e-07	258396	0	26	0	1.8
CG1918	cgp2317	1040	1041	0	0	2066	3221	0.0002	-12.2877	0	518938	0	44	0	2.1
CG1919	cgp2318	989	990	156	0	2180	4108	0.025	-5.32193	0	460862	1	63	0.1	3.2
CG192	cgp0222	404	405	0	0	216	30	0.004	-7.96578	0.0125294	81000	0	5	0	0.6
CG1920	cgp2320	395	396	312	156	1944	1129	0.1526	-2.71217	6e-08	72103.5	3	36	0.4	4.5
CG1921	cgp2321	1430	1431	0	156	4599	2518	0.0221	-5.49981	0	971672	1	77	0	2.7
CG1922	cgp2322	608	609	156	0	2114	1918	0.0389	-4.68409	0	174793	1	38	0.1	3.1
CG1923	treY	2435	2436	0	0	5340	5414	0.0001	-13.2877	0	2835504	0	111	0	2.3
CG1924	cgp2324	1025	1026	0	156	3249	3392	0.0236	-5.40507	0	495576	1	64	0	3.1
CG1925	cgp2325	131	132	0	0	1361	348	0.0006	-10.7027	0.00011344	7854	0	13	0	4.9
CG1926	cgp2326	374	375	0	0	583	1299	0.0005	-10.9658	1.71e-06	66375	0	21	0	2.8
CG1927	cgp2328	1040	1041	0	0	2928	5513	0.0001	-13.2877	0	504885	0	71	0	3.4
CG1928	cgp2329	1046	1047	0	0	5756	5714	0.0001	-13.2877	0	508842	0	76	0	3.6
CG1929	cgp2330	380	381	0	0	767	2051	0.0004	-11.2877	1.9e-07	67818	0	25	0	3.3
CG193	cgp0223	1475	1476	0	0	1641	3089	0.0002	-12.2877	0	1040580	0	66	0	2.2
CG1930	cgp2331	233	234	0	156	514	1094	0.0976	-3.35698	0.001028	26094	1	13	0.2	2.8
CG1931	cgp2332	653	654	0	0	1306	803	0.0005	-10.9658	6.6e-07	206337	0	23	0	1.8
CG1932	treZ	1724	1725	0	0	5580	3445	0.0001	-13.2877	0	1.40674e+06	0	98	0	2.8
CG1933	ilvA	1310	1311	0	156	4225	5134	0.0168	-5.89539	0	789910	1	107	0	4.1
CG1934	cgp2336	503	504	156	0	2061	1233	0.0476	-4.39289	1e-08	118700	1	35	0.1	3.5
CG1935	cgp2337	1205	1206	0	312	5073	6332	0.0274	-5.18968	0	656726	2	122	0.1	5.1
CG1936	dnaE1	3566	3567	0	0	136	1	0.0072	-7.11779	0.041625	6356394	0	3	0	0
CG1937	cgp2339	842	843	0	0	1199	619	0.0005	-10.9658	1e-08	341836	0	32	0	1.9
CG1938	cgp2340	470	471	0	0	588	340	0.0011	-9.82828	3.13e-06	106210	0	20	0	2.1
CG1939	cgp2341	986	983	0	156	2213	1877	0.0384	-4.70275	0	460550	1	48	0.1	2.4
CG194	tnp2f	1514	1515	0	0	0	0	1	0		1.14761e+06	0	0	0	0
CG1940	cgp2342	887	888	0	0	2554	1882	0.0002	-12.2877	0	370740	0	54	0	3
CG1941	cgp2343	2654	2624	0	0	6095	8067	0.0001	-13.2877	0	3259008	0	142	0	2.7
CG1942	cgp2344	953	954	0	0	1804	2334	0.0002	-12.2877	0	433116	0	46	0	2.4
CG1943	cgp2345	581	582	0	0	1428	1605	0.0003	-11.7027	0	158886	0	36	0	3.1
CG1944	rluD	932	931	0	0	844	339	0.0008	-10.2877	4.1e-07	422208	0	24	0	1.3
CG1945	IspA	572	573	0	0	220	183	0.0025	-8.64386	0.00075128	161300	0	10	0	0.9
CG1946	cgp2348	1004	1005	0	0	2584	3719	0.0002	-12.2877	0	471345	0	68	0	3.4
CG1947	cgp2349	1652	1653	0	0	4877	3573	0.0001	-13.2877	0	1.29843e+06	0	84	0	2.5
CG1948	cgp2350	602	603	0	0	1625	1299	0.0003	-11.7027	0	168538	0	45	0	3.7
CG1949	ansA	977	978	0	0	2090	2077	0.0002	-12.2877	0	455259	0	48	0	2.5
CG195	cgp0228	437	438	0	0	82	525	0.0016	-9.28771	0.00024578	93294	0	13	0	1.5
CG1950	cgp2353	317	236	0	0	597	696	0.0008	-10.2877	2.418e-05	25960	0	16	0	3.4
CG1951	tnp2e	1514	1515	0	0	0	0	1	0		1.14761e+06	0	0	0	0
CG1952	dinP	1403	1404	0	0	3119	2170	0.0002	-12.2877	0	936468	0	73	0	2.6
CG1953	cgp2356	860	861	0	156	2405	2290	0.0334	-4.90401	0	350439	1	48	0.1	2.8
CG1954	cgp2357	1004	998	0	0	1990	1434	0.0003	-11.7027	0	473551	0	49	0	2.5
CG1955	cgp2358	629	630	0	156	1985	1178	0.0496	-4.33352	2e-07	189950	1	29	0.1	2.3
CG1956	ileS	3164	3165	0	0	41	3	0.0222	-5.4933	0.00713629	4.99912e+06	0	6	0	0.1
CG1957	cgp2360	218	219	0	0	958	509	0.0007	-10.4804	0.000399	22776	0	11	0	2.5
CG1958	cgp2361	1097	1098	0	0	91	216	0.0032	-8.28771	0.0126204	600057	0	5	0	0.2
CG1959	cgp2362	287	288	0	0	68	0	0.0145	-6.1078	0.07883	41184	0	2	0	0.3
CG196	gltB	4532	4532	156	0	16000	15880	0.0049	-7.673	0	9.6351e+06	1	291	0	3.2
CG1960	cgp2363	458	459	0	0	3	939	0.0011	-9.82828	0.00703862	103964	0	6	0	0.7
CG1961	cgp2364	704	705	156	0	1663	2241	0.0402	-4.63666	0	234422	1	42	0.1	3
CG1962	cgp2365	740	741	156	0	2410	3163	0.0282	-5.14816	0	258621	1	44	0.1	3
CG1963	ftsZ	1328	1329	0	0	0	6	0.1429	-2.80692	0.158837	882456	0	1	0	0
CG1964	ftsQ	668	669	0	0	136	53	0.0053	-7.55979	0.0415938	222777	0	3	0	0.2
CG1965	cgp2368	1460	1461	0	0	1	0	0.5	-1	0.158821	1066530	0	1	0	0
CG1966	murG	1091	1092	0	0	161	27	0.0053	-7.55979	0.0227007	594048	0	4	0	0.2
CG1967	ftsW	1652	1653	0	0	1345	783	0.0005	-10.9658	1.5e-07	1.34472e+06	0	26	0	0.8
CG1968	murD	1418	1419	0	156	0	0	157	7.29462	0.158826	1007490	1	0	0	0
CG1969	mraY	1100	1101	0	0	448	309	0.0013	-9.58727	0.0126205	603348	0	5	0	0.2
CG197	gltD	1520	1521	0	0	3512	3736	0.0001	-13.2877	0	1.09284e+06	0	84	0	2.8
CG1970	murF	1544	1545	0	0	275	511	0.0013	-9.58727	0.00133371	1186560	0	9	0	0.3
CG1971	murE	1565	1566	0	0	15	1	0.0588	-4.08804	0.0416158	1223829	0	3	0	0.1
CG1972	ftsI	2114	2111	0	0	154	3	0.0063	-7.31043	0.00712799	2.22183e+06	0	6	0	0.1
CG1973	cgp2376	797	798	0	0	398	676	0.0009	-10.1178	0.00229704	315210	0	8	0	0.5
CG1974	mraW	1013	1010	0	0	815	1989	0.0004	-11.2877	1.4e-07	496920	0	26	0	1.3
CG1975	mraZ	431	432	0	0	602	1508	0.0005	-10.9658	2.737e-05	89856	0	17	0	2
CG1976	cgp2380	389	390	0	156	225	924	0.1365	-2.87303	0.00012126	73129	1	16	0.1	2.1
CG1977	cgp2381	425	426	0	0	1626	2154	0.0003	-11.7027	0	83496	0	34	0	4
CG1978	cgp2382	563	564	0	0	2834	1413	0.0002	-12.2877	0	146358	0	45	0	4
CG1979	metF	980	981	467	0	2649	2677	0.0879	-3.50799	0	449331	1	68	0.1	3.5
CG198	cgp0231	242	243	0	0	234	609	0.0012	-9.70275	0.00040433	28188	0	11	0	2.3
CG1980	idsA	1100	1101	0	0	921	1174	0.0005	-10.9658	0	579126	0	49	0	2.2
CG1981	cgp2385	1529	1530	0	156	2711	3822	0.024	-5.38082	0	1.10163e+06	1	93	0	3
CG1982	cgp2386	371	372	0	0	774	851	0.0006	-10.7027	1.542e-05	66030	0	18	0	2.4
CG1983	pknL	2222	2222	0	0	5629	4933	0.0001	-13.2877	0	2324212	0	130	0	2.9
CG1984	cgp2389	1238	1239	0	0	2948	3008	0.0002	-12.2877	0	725434	0	69	0	2.8
CG1985	cgp2390	1310	1311	0	0	4369	4337	0.0001	-13.2877	0	801021	0	89	0	3.4
CG1986	aroG	1388	1389	0	0	81	0	0.0122	-6.35698	0.078687	963272	0	2	0	0.1
CG1987	cgp2392	506	507	0	0	1	8	0.1	-3.32193	0.078752	128018	0	2	0	0.2
CG1988	cgp2393	2438	2439	312	156	7293	6546	0.0339	-4.88257	0	2780604	3	165	0.1	3.4
CG1989	cmt4	1451	1452	0	156	3711	3292	0.0224	-5.48036	0	1002623	1	75	0	2.6
CG199	cgp0232	158	159	0	0	395	196	0.0017	-9.20025	0.00380914	12084	0	7	0	2.2
CG1990	cgp2395	179	180	0	0	287	373	0.0015	-9.38082	0.000686	15300	0	11	0	3.1
CG1991	cgp2397	1190	1191	0	0	1119	867	0.0005	-10.9658	2.5e-07	694353	0	25	0	1
CG1992	plsC	737	738	0	0	1	69	0.0141	-6.14816	0.0415974	271215	0	3	0	0.2
CG1993	glk	971	972	0	0	79	263	0.0029	-8.42973	0.0226946	470448	0	4	0	0.2
CG1994	cgp2400	1145	1146	0	0	6	6	0.0769	-3.70087	0.0416098	654939	0	3	0	0.1
CG1995	cgp2401	1019	1020	0	0	2983	1137	0.0002	-12.2877	0	497250	0	45	0	2.2
CG1996	cgp2402	629	630	0	0	206	1972	0.0005	-10.9658	0	185220	0	42	0	3.3
CG1997	qcrB	1619	1620	0	0	22	1	0.0417	-4.58381	0.0416164	1309770	0	3	0	0.1
CG1998	qcrA1	1226	1219	0	0	0	1	0.5	-1	0.158854	742371	0	1	0	0
CG1999	qcrC	887	888	0	0	2	0	0.3333	-1.58511	0.158928	393828	0	1	0	0.1
CG2	cgp0002	305	306	0	0	121	358	0.0021	-8.89539	0.0124828	46053	0	5	0	0.8
CG20	cgp0025	872	873	0	0	3388	2872	0.0002	-12.2877	0	356620	0	56	0	3.2
CG200	cgp0233	1487	1469	0	0	5896	2848	0.0001	-13.2877	0	1.00994e+06	0	95	0	3.2
CG2000	ctaE	617	618	0	0	0	0	1	0		190962	0	0	0	0
CG2001	cgp2408	431	432	0	0	0	0	1	0		93312	0	0	0	0
CG2002	ctaC	1079	1080	0	0	0	49	0.02	-5.64386	0.0416084	581580	0	3	0	0.1
CG2003	ltsA	1922	1923	0	0	1563	1919	0.0003	-11.7027	0	1.80858e+06	0	44	0	1.1
CG2004	cgp2411	344	345	0	0	0	149	0.0067	-7.22162	0.0125043	58650	0	5	0	0.7
CG2005	cgp2412	719	720	0	0	2995	2099	0.0002	-12.2877	0	241200	0	51	0	3.5
CG2006	cobU	524	525	0	0	1873	890	0.0004	-11.2877	6.3e-07	131775	0	24	0	2.3
CG2007	cobT	1076	1077	0	156	950	3782	0.0332	-4.91267	0	554670	1	48	0	2.2
CG2008	cobS	923	924	156	0	2034	983	0.052	-4.26534	0	407500	1	43	0.1	2.3
CG2009	cgp2416	251	252	0	0	112	709	0.0012	-9.70275	0.00023165	30240	0	12	0	2.4
CG201	emb	3473	3474	0	0	414	522	0.0011	-9.82828	6.37e-06	6001335	0	19	0	0.3
CG2010	cgp2417	716	717	0	0	3656	3498	0.0001	-13.2877	0	238761	0	53	0	3.7
CG2011	ilvE	1103	1104	0	0	1662	1893	0.0003	-11.7027	0	582360	0	49	0	2.2
CG2012	pepB	1541	1542	312	0	4745	5195	0.0315	-4.9885	0	1111056	1	103	0	3.3
CG2013	cgp2420	395	396	0	0	973	961	0.0005	-10.9658	1e-06	74052	0	22	0	2.8
CG2014	sucB	2027	2028	0	0	87	0	0.0114	-6.45482	0.0126448	2051322	0	5	0	0.1
CG2015	lipB	755	756	0	0	24	1	0.0385	-4.699	0.0125962	283878	0	5	0	0.3
CG2016	lipA	1046	1047	156	0	370	183	0.2834	-1.81909	0.0511942	546012	1	5	0	0.2
CG2017	cgp2424	782	783	0	0	272	91	0.0027	-8.53282	0.0125989	304587	0	5	0	0.3
CG2018	cgp2425	1619	1620	0	0	6646	6638	0.0001	-13.2877	0	1210140	0	126	0	3.9
CG2019	tnp2d	1514	1515	0	0	0	0	1	0		1.14761e+06	0	0	0	0
CG202	cgp0236	2033	2026	312	0	123	0	2.5242	1.33583	0.0293846	2047276	1	6	0	0.1
CG2020	cgp2428	473	474	0	0	35	16	0.0192	-5.70275	0.0226363	111390	0	4	0	0.4
CG2021	glnA	1433	1434	0	0	0	0	1	0		1028178	0	0	0	0
CG2022	cgp2430	167	168	0	0	249	262	0.002	-8.96578	0.00120628	13356	0	9	0	2.7
CG2023	cgp2431	401	398	0	0	764	795	0.0006	-10.7027	5.21e-06	75421	0	19	0	2.4
CG2024	cgp2432	536	537	0	312	1166	1524	0.1163	-3.10408	1e-08	135609	1	33	0.1	3.1
CG2025	cgp2434	908	909	0	0	1680	3002	0.0002	-12.2877	0	387234	0	58	0	3.2
CG2026	cgp2435	347	348	0	0	362	196	0.0018	-9.11779	0.00224371	59160	0	8	0	1.1
CG2027	cgp2436	92	93	0	0	56	207	0.0038	-8.03978	0.0120506	4092	0	5	0	2.7
CG2028	thrC	1445	1446	0	156	2986	3466	0.0243	-5.3629	0	992701	1	75	0	2.6
CG2029	cgp2438	218	219	0	0	825	1088	0.0005	-10.9658	4.31e-06	21900	0	20	0	4.6
CG203	cgp0237	761	762	468	0	231	1125	0.3456	-1.53282	4.053e-05	282728	3	23	0.2	1.5
CG2030	cgp2440	1325	1326	0	0	7606	4208	0.0001	-13.2877	0	804882	0	112	0	4.2
CG2031	cgp2441	494	401	0	0	943	735	0.0006	-10.7027	4.684e-05	77393	0	15	0	1.9
CG2032	cgp2442	446	447	0	0	1764	306	0.0005	-10.9658	9.23e-06	95881.5	0	18	0	2
CG2033	cgp2443	407	408	0	0	328	838	0.0009	-10.1178	8.129e-05	80376	0	14	0	1.7
CG2034	cgp2444	482	483	0	0	762	1751	0.0004	-11.2877	0	108916	0	33	0	3.4
CG2035	hmuO	647	648	0	0	1356	2255	0.0003	-11.7027	0	196992	0	42	0	3.2
CG2036	glnE	3137	3138	0	156	5037	8193	0.0119	-6.39289	0	4686658	1	154	0	2.5
CG2037	glnA2	1340	1341	0	0	3298	2628	0.0002	-12.2877	0	849524	0	75	0	2.8
CG2038	cgp2449	1106	1107	0	0	4764	4479	0.0001	-13.2877	0	572319	0	74	0	3.3
CG2039	cgp2450	1817	1818	0	0	4538	5858	0.0001	-13.2877	0	1548027	0	118	0	3.2
CG204	cgp0238	1466	1467	0	0	8	68	0.013	-6.26534	0.0227133	1.07311e+06	0	4	0	0.1
CG2040	cgp2451	182	183	0	0	202	78	0.0036	-8.11779	0.0224554	16378.5	0	4	0	1.1
CG2041	galK	1295	1296	0	0	3474	3668	0.0001	-13.2877	0	793800	0	71	0	2.7
CG2042	cgp2453	1409	1410	0	0	3622	4417	0.0001	-13.2877	0	938355	0	79	0	2.8
CG2043	cgp4102	395	396	0	0	1	48	0.02	-5.64386	0.0415673	77814	0	3	0	0.4
CG2044	cgp2455	1148	1149	0	156	2561	3421	0.0262	-5.25429	0	630816	1	52	0	2.3
CG2045	cgp2456	719	720	0	0	3066	2018	0.0002	-12.2877	0	240120	0	53	0	3.7
CG2046	cgp2457	1142	1143	0	156	5088	3831	0.0176	-5.82828	0	608665	1	81	0	3.5
CG2047	pgp2	656	657	0	0	2073	3098	0.0002	-12.2877	0	196443	0	60	0	4.6
CG2048	ptpA	500	487	0	0	702	936	0.0006	-10.7027	2e-08	111523	0	30	0	3.1
CG2049	cgp2460	1001	1002	0	0	917	1351	0.0004	-11.2877	5.98e-06	492483	0	19	0	0.9
CG205	cgp0239	227	228	0	0	105	31	0.0073	-7.09789	0.0038885	25194	0	7	0	1.5
CG2050	tnp4a	395	396	0	0	1049	1817	0.0003	-11.7027	4e-08	72864	0	28	0	3.5
CG2051	cgp2462	593	594	0	0	2597	1864	0.0002	-12.2877	0	166023	0	35	0	2.9
CG2052	cgpt5041	75	76	0	0	0	0	1	0		2888	0	0	0	0
CG2053	cgp2464	431	432	0	0	383	683	0.0009	-10.1178	1.78e-06	88776	0	21	0	2.4
CG2054	aceE	2768	2769	0	0	71	155	0.0044	-7.82828	0.00045087	3818451	0	11	0	0.2
CG2055	cgp2467	791	792	0	0	812	1608	0.0004	-11.2877	0	296604	0	44	0	2.8
CG2056	cgp2468	890	887	0	0	3293	2143	0.0002	-12.2877	0	371210	0	50	0	2.8
CG2057	cgp2470	992	993	0	312	4436	4934	0.0334	-4.90401	0	454332	1	83	0.1	4.2
CG2058	cgp2471	800	801	0	0	2202	1824	0.0002	-12.2877	0	299974	0	52	0	3.2
CG2059	cgp2472	1016	1017	156	0	2049	1969	0.0391	-4.67669	0	490722	1	56	0	2.8
CG206	cgp0240	491	488	0	0	1662	1100	0.0004	-11.2877	4e-08	112240	0	30	0	3.1
CG2060	acpM	293	294	0	0	450	333	0.0013	-9.58727	0.00072236	41748	0	10	0	1.7
CG2061	cgp2474	827	828	312	0	2082	1837	0.0798	-3.64747	6e-08	329973	2	36	0.1	2.2
CG2062	cgp2475	1034	1035	0	0	3112	4591	0.0001	-13.2877	0	503010	0	63	0	3
CG2063	cgp2477	428	429	156	0	685	2722	0.0461	-4.43909	3e-08	85594	1	31	0.1	3.6
CG2064	cgp2478	809	810	0	0	2501	3953	0.0002	-12.2877	0	299295	0	71	0	4.4
CG2065	cgp2479	458	459	0	0	1328	946	0.0004	-11.2877	0	97537.5	0	35	0	3.8
CG2066	cgp2480	563	564	0	0	3013	1622	0.0002	-12.2877	0	148050	0	39	0	3.5
CG2067	cgp2481	242	243	0	0	525	369	0.0011	-9.82828	0.00124936	28431	0	9	0	1.9
CG2068	cgp2482	545	546	0	0	1925	1355	0.0003	-11.7027	0	139503	0	35	0	3.2
CG2069	cgp2483	428	425	0	0	577	1021	0.0006	-10.7027	1.58e-05	86700	0	17	0	2
CG207	cgp0241	455	456	0	0	3140	2087	0.0002	-12.2877	0	92112	0	54	0	5.9
CG2070	cgp2484	344	345	0	0	1424	1949	0.0003	-11.7027	1e-07	55027.5	0	26	0	3.8
CG2071	cgpt5042	76	77	0	0	0	0	1	0		2964.5	0	0	0	0
CG2072	phoD	1550	1551	0	0	3245	3397	0.0002	-12.2877	0	1.13921e+06	0	83	0	2.7
CG2073	cgpt5043	75	76	0	0	0	0	1	0		2888	0	0	0	0
CG2074	cgpt5044	75	76	0	0	289	0	0.0034	-8.20025	0.0412919	2774	0	3	0	2
CG2075	cgp2487	1838	1839	0	0	5768	8089	0.0001	-13.2877	0	1.58246e+06	0	119	0	3.2
CG2076	cgp2488	242	243	156	0	505	392	0.1748	-2.51622	0.00020156	27831	1	15	0.2	3.1
CG2077	dnaG	1901	1902	0	0	3	728	0.0014	-9.48036	0.0126429	1804047	0	5	0	0.1
CG2078	cgp2490	494	495	0	0	2070	2017	0.0002	-12.2877	1e-08	115088	0	30	0	3
CG2079	cgp2491	245	246	0	0	1495	927	0.0004	-11.2877	1.46e-06	27675	0	22	0	4.5
CG208	cgp0242	896	897	0	0	989	1553	0.0004	-11.2877	0	383019	0	43	0	2.4
CG2080	glmS	1871	1872	0	0	0	0	1	0		1752192	0	0	0	0
CG2081	dgt	1274	1275	0	0	4194	3556	0.0001	-13.2877	0	764362	0	77	0	3
CG2082	cgp2495	677	678	0	0	1263	3315	0.0002	-12.2877	0	213909	0	48	0	3.5
CG2083	cgp2496	2054	2055	0	156	6435	4221	0.0147	-6.08804	0	1986196	1	123	0	3
CG2084	cgp2497	488	489	0	0	959	889	0.0005	-10.9658	1.06e-06	114182	0	23	0	2.4
CG2085	cgp2498	584	585	0	156	267	414	0.2302	-2.11904	1.497e-05	165565	1	20	0.1	1.7
CG2086	glyS	1385	1386	0	0	1	1	0.3333	-1.58511	0.078687	959112	0	2	0	0.1
CG2087	cgp2500	371	372	0	0	1305	1793	0.0003	-11.7027	2.96e-06	65472	0	20	0	2.7
CG2088	fur	434	435	0	0	1242	480	0.0006	-10.7027	4e-08	88522.5	0	29	0	3.3
CG2089	cgp2504	1553	1554	0	0	1420	617	0.0005	-10.9658	3.63e-06	1191918	0	20	0	0.6
CG209	cgp0243	434	435	156	0	876	884	0.0892	-3.48681	4e-08	88100	1	31	0.1	3.6
CG2090	cgp2505	107	108	0	0	521	303	0.0012	-9.70275	0.00368732	5454	0	7	0	3.2
CG2091	cgp2507	1073	1074	0	0	3161	1898	0.0002	-12.2877	0	545592	0	59	0	2.7
CG2092	uppS2	731	731	0	156	0	1	78.5	6.29462	0.5	267181	1	1	0.1	0.1
CG2093	recO	728	729	0	0	50	195	0.0041	-7.93016	1.695e-05	259524	0	17	0	1.2
CG2094	bex	917	918	0	0	87	2	0.0111	-6.4933	0.00709564	418608	0	6	0	0.3
CG2095	cgp2511	1322	1323	0	156	3539	5074	0.0182	-5.77992	0	820284	1	85	0	3.2
CG2096	cgp2512	590	591	0	0	0	13	0.0714	-3.80793	0.0787375	174050	0	2	0	0.2
CG2097	phoH2	1019	1016	0	0	2348	1997	0.0002	-12.2877	0	494792	0	43	0	2.1
CG2098	cgp2514	725	725	0	0	2636	2149	0.0002	-12.2877	0	247588	0	42	0	2.9
CG2099	cgp2515	1148	1149	0	0	1504	3663	0.0002	-12.2877	0	615290	0	81	0	3.5
CG21	cgp0026	746	747	623	0	1232	1634	0.2176	-2.20025	1e-08	266695	1	34	0.1	2.3
CG210	cgp0244	404	405	0	6543	994	1535	2.5866	1.37106	1e-07	76357	1	29	0.1	3.6
CG2100	hrcA	1028	1029	0	156	2749	3617	0.0247	-5.33935	0	493941	1	71	0	3.4
CG2101	cgp2517	1142	1143	0	156	1501	3024	0.0347	-4.84892	0	615530	1	69	0	3
CG2102	cgp2518	512	513	0	0	1253	871	0.0005	-10.9658	1.2e-07	124916	0	26	0	2.5
CG2103	cgp2519	680	681	0	0	459	633	0.0009	-10.1178	1.14e-06	224390	0	22	0	1.6
CG2104	cgp2520	380	377	0	0	1585	1223	0.0004	-11.2877	0	64844	0	33	0	4.4
CG2105	fadD15	1847	1848	156	156	8464	9672	0.0173	-5.85308	0	1568103	2	156	0.1	4.2
CG2106	malQ	2120	2121	0	0	9724	7881	0.0001	-13.2877	0	2091306	0	154	0	3.6
CG2107	cgp2524	1865	1866	0	0	2760	2746	0.0002	-12.2877	0	1670070	0	77	0	2.1
CG2108	cgp2525	140	141	0	0	0	0	1	0		9940.5	0	0	0	0
CG2109	cgp2526	206	199	0	0	948	1276	0.0004	-11.2877	1.298e-05	18109	0	17	0	4.3
CG211	cgp0245	635	636	0	0	532	1198	0.0006	-10.7027	1.13e-06	195252	0	22	0	1.7
CG2110	dcp	2036	2037	0	156	7333	7211	0.0108	-6.53282	0	1935186	1	138	0	3.4
CG2111	cgp2528	1181	1182	0	0	4061	3410	0.0001	-13.2877	0	665466	0	56	0	2.4
CG2112	treS	1814	1815	156	0	6110	5878	0.0131	-6.25429	0	1.54097e+06	1	120	0	3.3
CG2113	treX	1091	1088	0	0	2945	2892	0.0002	-12.2877	0	553792	0	73	0	3.4
CG2114	idi	569	570	0	0	717	1163	0.0005	-10.9658	4e-08	154470	0	29	0	2.5
CG2115	cgp2533	1757	1758	0	0	2655	5458	0.0001	-13.2877	0	1464414	0	92	0	2.6
CG2116	cgp2534	566	563	0	0	1628	1249	0.0003	-11.7027	2e-08	150321	0	29	0	2.6
CG2117	cgp2535	521	522	156	0	1544	826	0.0662	-3.91702	1.1e-07	128944	1	29	0.1	2.8
CG2118	aecD	1106	1107	156	0	3614	4214	0.0201	-5.63666	0	575658	1	69	0	3.1
CG2119	brnQ	1280	1281	0	156	5175	1813	0.0225	-5.47393	0	783349	1	59	0	2.3
CG212	cgp0246	932	929	0	0	4	1	0.1667	-2.58467	0.0787055	430592	0	2	0	0.1
CG2120	cgp2538	980	981	0	0	4353	1966	0.0002	-12.2877	0	446846	0	71	0	3.6
CG2121	cgp2539	1847	1848	0	0	3925	4812	0.0001	-13.2877	0	1628088	0	86	0	2.3
CG2122	cgp2540	518	519	0	0	1174	880	0.0005	-10.9658	2e-08	127155	0	29	0	2.8
CG2123	cgp2542	929	930	0	0	2210	2506	0.0002	-12.2877	0	405945	0	58	0	3.1
CG2124	glcD	2846	2847	0	156	4850	4826	0.0162	-5.94786	0	3887619	1	119	0	2.1
CG2125	cgp2544	713	714	0	0	518	873	0.0007	-10.4804	5.77e-06	248115	0	19	0	1.3
CG2126	cgp2545	257	258	0	0	716	731	0.0007	-10.4804	7.585e-05	31476	0	14	0	2.7
CG2127	cgp2546	1349	1350	0	0	3004	2249	0.0002	-12.2877	0	868050	0	64	0	2.4
CG2128	cgp2549	1511	1508	0	0	1509	1924	0.0003	-11.7027	0	1100840	0	48	0	1.6
CG2129	cgp2550	968	969	0	6699	1641	1684	2.0144	1.01035	0	450605	1	42	0.1	2.2
CG213	cgp0247	599	600	0	0	1012	2673	0.0003	-11.7027	0	169200	0	38	0	3.2
CG2130	cgp2551	830	823	0	0	531	816	0.0007	-10.4804	0	325085	0	33	0	2
CG2131	cgp2552	1439	1436	0	312	1695	1282	0.1051	-3.25017	0	992302	1	55	0	1.9
CG2132	cgp2553	551	552	156	0	2801	2302	0.0308	-5.02093	0	139668	1	47	0.1	4.3
CG2133	rbsK2	905	906	156	156	3525	1909	0.0576	-4.11779	0	382820	2	64	0.1	3.5
CG2134	cgp2556	1400	1401	0	0	2291	2698	0.0002	-12.2877	0	930964	0	75	0	2.7
CG2135	cgp2557	974	975	0	0	2464	3451	0.0002	-12.2877	0	444600	0	65	0	3.3
CG2136	cgp2558	767	768	0	0	4465	2013	0.0002	-12.2877	0	270720	0	63	0	4.1
CG2137	aceB	2219	2216	0	0	3991	5115	0.0001	-13.2877	0	2319044	0	124	0	2.8
CG2138	aceA	1298	1299	0	156	6527	6417	0.0121	-6.36885	0	776179	1	109	0	4.2
CG2139	thiX	572	573	0	156	3054	2419	0.0287	-5.12281	0	150139	1	52	0.1	4.5
CG214	cgp0248	791	792	0	0	0	87	0.0114	-6.45482	0.0787151	312840	0	2	0	0.1
CG2140	cgp2562	590	591	0	0	1165	1111	0.0004	-11.2877	1.3e-07	166958	0	26	0	2.2
CG2141	lcoP	1892	1893	0	0	3961	3603	0.0001	-13.2877	0	1698021	0	100	0	2.6
CG2142	cgp2564	281	282	0	0	0	575	0.0017	-9.20025	0.00222182	38634	0	8	0	1.4
CG2143	cgp2565	998	999	156	156	2644	1813	0.0702	-3.83239	0	474555	2	52	0.1	2.6
CG2144	cgp2566	1595	1596	0	0	4120	4016	0.0001	-13.2877	0	1201788	0	92	0	2.9
CG2145	cgp2567	386	387	156	156	981	737	0.1821	-2.4572	0.0060266	73146	2	11	0.3	1.4
CG2146	dctM	1313	1314	0	0	3196	3813	0.0001	-13.2877	0	816651	0	73	0	2.8
CG2147	dctX	524	521	0	0	1162	2242	0.0003	-11.7027	0	125561	0	39	0	3.7
CG2148	dctP	749	750	0	0	1841	1194	0.0003	-11.7027	0	265500	0	43	0	2.9
CG2149	lepA	1847	1848	0	156	3159	4348	0.0209	-5.58035	0	1.61149e+06	1	109	0	2.9
CG215	cgp0249	896	897	0	0	0	107	0.0093	-6.74855	0.0126084	400062	0	5	0	0.3
CG2150	cgp2572	611	612	0	0	718	493	0.0008	-10.2877	4e-08	178704	0	28	0	2.3
CG2151	rpsT	263	264	0	0	1	0	0.5	-1	0.159574	34716	0	1	0	0.2
CG2152	cgp2574	671	672	156	0	1765	1691	0.0454	-4.46116	0	210014	1	49	0.1	3.6
CG2153	cgp2575	401	402	0	0	647	827	0.0007	-10.4804	1.564e-05	77385	0	18	0	2.2
CG2154	cgp2576	977	978	0	0	237	119	0.0028	-8.48036	0.0787027	477264	0	2	0	0.1
CG2155	cgp2577	1664	1665	312	0	4822	4881	0.0323	-4.95232	0	1297114	2	111	0.1	3.3
CG2156	cgp2578	653	650	0	0	1193	1791	0.0003	-11.7027	0	200200	0	34	0	2.6
CG2157	cgp2579	824	825	0	0	127	154	0.0035	-8.15843	0.0416011	339075	0	3	0	0.2
CG2158	cgp2581	710	711	0	0	593	1660	0.0004	-11.2877	1e-08	241384	0	33	0	2.3
CG2159	cgp2582	473	474	0	0	321	1788	0.0005	-10.9658	6.1e-07	106887	0	23	0	2.4
CG216	cgp0250	1175	1172	156	0	5728	5053	0.0146	-6.09789	0	632908	1	94	0	4
CG2160	cgp2583	122	123	0	0	142	18	0.0062	-7.33352	0.0122013	7257	0	5	0	2
CG2161	nadD	656	657	0	0	20	0	0.0476	-4.39289	0.159024	215496	0	1	0	0.1
CG2162	cgp2585	1025	1026	0	0	3394	4281	0.0001	-13.2877	0	492993	0	65	0	3.2
CG2163	proA	1298	1299	0	0	6361	5685	0.0001	-13.2877	0	778101	0	102	0	3.9
CG2164	cgp2587	914	915	0	0	4272	5666	0.0001	-13.2877	0	382012	0	83	0	4.5
CG2165	proB	1229	1230	0	0	2490	1982	0.0002	-12.2877	0	718935	0	61	0	2.5
CG2166	cgp2589	1505	1506	0	0	2	262	0.0038	-8.03978	0.0126348	1130253	0	5	0	0.2
CG2167	cgp2590	1934	1935	156	156	6299	6492	0.0245	-5.35107	0	1.73869e+06	2	144	0.1	3.7
CG2168	dkgA	917	918	156	0	2712	3578	0.025	-5.32193	0	387880	1	76	0.1	4.1
CG2169	cgp2592	623	624	0	0	331	859	0.0008	-10.2877	1.93e-06	188136	0	21	0	1.7
CG217	cgp0251	980	977	0	0	1648	2080	0.0003	-11.7027	0	456259	0	44	0	2.3
CG2170	cgp2593	272	273	0	0	1211	494	0.0006	-10.7027	2.68e-06	34534.5	0	20	0	3.7
CG2171	rpmA	266	267	0	0	0	0	1	0		35644.5	0	0	0	0
CG2172	rplU	305	306	0	0	2	0	0.3333	-1.58511	0.159447	46665	0	1	0	0.2
CG2173	rne	3065	3066	0	0	1713	2958	0.0002	-12.2877	0	4571406	0	84	0	1.4
CG2174	cgp2598	737	738	1091	0	1839	2151	0.2736	-1.86986	0	256122	2	47	0.1	3.2
CG2175	cgp2599	611	598	0	0	1774	1906	0.0003	-11.7027	0	165347	0	46	0	3.8
CG2176	tnp1d	1310	1311	0	0	344	472	0.0012	-9.70275	0.00231334	854116	0	8	0	0.3
CG2177	cgp2601	380	381	0	0	1610	1911	0.0003	-11.7027	1e-08	66675	0	31	0	4.1
CG2178	cgp2602	452	453	0	0	1472	1058	0.0004	-11.2877	1.04e-06	97621.5	0	22	0	2.4
CG2179	ndk	410	411	0	0	839	1736	0.0004	-11.2877	0	77679	0	33	0	4
CG218	cgp0252	527	528	0	0	872	1112	0.0005	-10.9658	7e-08	132264	0	27	0	2.6
CG2180	cgp2604	320	321	0	0	332	1297	0.0006	-10.7027	7.872e-05	49273.5	0	15	0	2.3
CG2181	cgp2605	344	345	0	156	352	167	0.3019	-1.72786	0.00321047	57964	1	10	0.1	1.4
CG2182	cgp2606	467	468	0	0	695	1271	0.0005	-10.9658	1.05e-06	104364	0	22	0	2.4
CG2183	cgp2607	425	426	0	0	297	130	0.0023	-8.76415	0.00397473	89247	0	7	0	0.8
CG2184	folC	1523	1519	0	0	7	38	0.0217	-5.52616	0.0227146	1.15064e+06	0	4	0	0.1
CG2185	valS	2711	2712	0	0	862	184	0.001	-9.96578	0.00713352	3669336	0	6	0	0.1
CG2186	cgp2610	1577	1578	0	0	4219	4391	0.0001	-13.2877	0	1155885	0	116	0	3.7
CG2187	hscA	1454	1455	156	0	5784	2917	0.018	-5.79586	0	991605	1	99	0	3.4
CG2188	cgp2612	587	588	0	0	1540	2911	0.0002	-12.2877	0	161994	0	38	0	3.2
CG2189	mdh	986	987	0	0	4632	3698	0.0001	-13.2877	0	453526	0	69	0	3.5
CG219	cgpt5007	87	88	0	0	0	0	1	0		3872	0	0	0	0
CG2190	cgp2614	779	776	0	0	96	11	0.0093	-6.74855	0.0125983	299148	0	5	0	0.3
CG2191	cgp2615	578	579	0	0	954	1081	0.0005	-10.9658	4e-08	159514	0	28	0	2.4
CG2192	vanA	1130	1131	0	156	2562	3393	0.0264	-5.24332	0	606230	1	61	0	2.7
CG2193	vanB	977	978	156	156	2014	2992	0.0625	-4	0	454312	2	52	0.1	2.7
CG2194	vanK	1340	1341	156	0	4958	4946	0.0159	-5.97483	0	835466	1	100	0	3.7
CG2195	cgp2619	932	918	156	0	3737	1760	0.0286	-5.12784	5e-08	407600	1	33	0.1	1.8
CG2196	clpX	1280	1281	0	0	1	3	0.2	-2.32193	0.0416122	818559	0	3	0	0.1
CG2197	cgp2621	1088	1075	0	0	4756	2947	0.0001	-13.2877	0	538038	0	75	0	3.5
CG2198	pcaJ	635	635	0	0	2455	2660	0.0002	-12.2877	0	182880	0	62	0	4.9
CG2199	pcaI	743	744	0	0	2903	2805	0.0002	-12.2877	0	258540	0	50	0	3.4
CG22	cgp0027	371	372	0	0	2017	2393	0.0002	-12.2877	1e-08	63426	0	31	0	4.2
CG220	cgp0253	281	278	0	0	2622	1540	0.0002	-12.2877	5e-08	34889	0	28	0	5
CG2200	pcaR	767	768	0	0	1611	730	0.0004	-11.2877	0	279936	0	40	0	2.6
CG2201	pcaF	1226	1227	156	0	4238	3698	0.0198	-5.65836	0	704319	1	84	0	3.4
CG2202	pcaD	755	756	0	0	2931	3207	0.0002	-12.2877	0	262710	0	63	0	4.2
CG2203	pcaO	2063	2049	0	156	5291	6263	0.0136	-6.20025	0	1.97937e+06	1	118	0	2.9
CG2204	cgp2628	368	369	0	156	1611	1837	0.0455	-4.45799	3e-08	62553	1	32	0.1	4.3
CG2205	pcaB	1118	1118	0	156	2073	2096	0.0376	-4.73312	0	598702	1	49	0	2.2
CG2206	pcaG	614	589	0	0	2614	2478	0.0002	-12.2877	0	157852	0	53	0	4.5
CG2207	pcaH	692	693	0	0	3673	3251	0.0001	-13.2877	0	217602	0	66	0	4.8
CG2208	cgp2633	1160	1161	0	312	4048	4583	0.0363	-4.78389	0	626993	2	86	0.1	3.7
CG2209	catC	293	294	0	156	1072	1149	0.0707	-3.82215	2.39e-06	39987.5	1	23	0.2	3.9
CG221	cgp0254	1487	1488	0	0	4084	5514	0.0001	-13.2877	0	1019280	0	122	0	4.1
CG2210	catB	1121	1122	0	0	3688	3990	0.0001	-13.2877	0	594099	0	65	0	2.9
CG2211	catA	857	858	0	0	3067	3666	0.0001	-13.2877	0	346632	0	51	0	3
CG2212	benA	1493	1494	156	156	3933	4790	0.0359	-4.79987	0	1054066	2	86	0.1	2.9
CG2213	cgp2638	494	495	156	0	1184	874	0.0763	-3.71217	4.219e-05	118309	1	18	0.1	1.8
CG2214	benC	1538	1535	0	0	3389	3463	0.0001	-13.2877	0	1.12899e+06	0	64	0	2.1
CG2215	benD	830	831	0	0	1970	1809	0.0003	-11.7027	0	326168	0	46	0	2.8
CG2216	benR	2687	2688	156	0	5883	7051	0.0121	-6.36885	0	3439333	1	132	0	2.5
CG2217	benK	1340	1341	467	0	4283	3107	0.0633	-3.98165	0	853579	1	70	0	2.6
CG2218	benE	1244	1245	0	0	962	781	0.0006	-10.7027	3e-08	756960	0	29	0	1.2
CG2219	clpP2	626	627	0	0	1	0	0.5	-1	0.159041	196251	0	1	0	0.1
CG222	cgp0255	371	372	0	0	1565	1115	0.0004	-11.2877	0	63240	0	32	0	4.3
CG2220	clpP1	593	594	0	0	0	0	1	0		176418	0	0	0	0
CG2221	tig	1349	1350	0	0	206	8126	0.0001	-13.2877	0	863325	0	71	0	2.6
CG2222	cgpt5045	73	74	0	0	0	0	1	0		2738	0	0	0	0
CG2223	cgp2648	497	498	0	0	941	956	0.0005	-10.9658	3.6e-07	118026	0	25	0	2.5
CG2224	cgp2649	1028	1028	0	0	3093	3376	0.0002	-12.2877	0	487272	0	81	0	3.9
CG2225	cgp2650	458	455	0	0	2115	1612	0.0003	-11.7027	0	95777.5	0	36	0	4
CG2226	cgpt5046	74	75	0	0	0	0	1	0		2812.5	0	0	0	0
CG2227	cgp2651	251	252	0	0	632	358	0.001	-9.96578	7.551e-05	29988	0	15	0	3
CG2228	tnp12a	440	441	0	0	433	1113	0.0006	-10.7027	8.202e-05	94153.5	0	15	0	1.7
CG2229	tnp12b	302	303	0	0	896	905	0.0006	-10.7027	1.7e-07	42117	0	25	0	4.1
CG223	cgp0256	893	885	0	0	3183	1026	0.0002	-12.2877	0	367718	0	55	0	3.1
CG2230	cgp2657	887	888	0	0	2383	1652	0.0002	-12.2877	0	377400	0	39	0	2.2
CG2231	rpi	473	474	0	0	0	1	0.5	-1	0.159166	112101	0	1	0	0.1
CG2232	cgp2659	698	699	0	0	1993	2158	0.0002	-12.2877	0	231718	0	36	0	2.6
CG2233	cgp2660	101	102	0	0	167	65	0.0043	-7.86145	0.0791602	5100	0	2	0	1
CG2234	cgp2661	611	612	0	0	1311	1831	0.0003	-11.7027	0	175644	0	39	0	3.2
CG2235	pepN	2603	2604	156	156	7693	9576	0.0181	-5.78787	0	3169161	2	174	0	3.3
CG2236	cgp2663	107	108	0	0	0	0	1	0		5832	0	0	0	0
CG2237	cgp2664	1085	1086	0	0	1819	2083	0.0003	-11.7027	0	570693	0	36	0	1.7
CG2238	cgp2665	977	978	0	0	2101	3216	0.0002	-12.2877	0	447435	0	64	0	3.3
CG2239	cgp2666	668	669	0	0	2165	1632	0.0003	-11.7027	1e-08	213076	0	32	0	2.4
CG224	moeB	1073	1074	0	0	2088	1374	0.0003	-11.7027	0	549888	0	50	0	2.3
CG2240	cgp2667	158	159	0	0	0	32	0.0303	-5.04454	0.160182	12561	0	1	0	0.3
CG2241	crtl	329	304	0	0	450	588	0.001	-9.96578	2.571e-05	43776	0	16	0	2.6
CG2242	crtl'	1187	1188	0	0	3064	1689	0.0002	-12.2877	0	678348	0	48	0	2
CG2243	crtB	863	860	0	0	2096	2017	0.0002	-12.2877	0	354320	0	37	0	2.2
CG2244	cgp2673	1121	1122	0	0	2794	4155	0.0001	-13.2877	0	589050	0	72	0	3.2
CG2245	cgp2674	1235	1236	0	0	6424	5547	0.0001	-13.2877	0	708228	0	92	0	3.7
CG2246	cgp2675	1643	1644	0	312	4510	6199	0.0292	-5.09789	0	1265946	2	106	0.1	3.2
CG2247	cgp2676	884	885	0	0	5366	2987	0.0001	-13.2877	0	361965	0	67	0	3.8
CG2248	cgp2677	941	942	0	0	5176	4711	0.0001	-13.2877	0	404118	0	87	0	4.6
CG2249	cgp2678	1709	1710	156	0	8298	9076	0.009	-6.79586	0	1.32871e+06	1	160	0	4.7
CG225	moaE	458	444	156	0	3428	876	0.0365	-4.77596	1e-07	92357.5	1	29	0.1	3.3
CG2250	cgp2679	1943	1944	468	0	6957	5894	0.0365	-4.77596	0	1769130	2	129	0.1	3.3
CG2251	cgp2680	1370	1371	0	156	4676	5993	0.0147	-6.08804	0	873346	1	98	0	3.6
CG2252	cgp2683	1553	1554	0	0	2973	2098	0.0002	-12.2877	0	1171716	0	47	0	1.5
CG2253	cgp2684	749	746	0	0	1483	1137	0.0004	-11.2877	0	265949	0	33	0	2.2
CG2254	cgp2685	710	711	0	0	794	1427	0.0005	-10.9658	0	238540	0	40	0	2.8
CG2255	cgp2686	740	741	0	0	3839	5267	0.0001	-13.2877	0	250828	0	68	0	4.6
CG2256	metB	1160	1161	0	0	8467	5717	0.0001	-13.2877	0	611847	0	111	0	4.8
CG2257	cgp2688	785	786	0	156	1464	1390	0.055	-4.18442	2e-08	296332	1	33	0.1	2.1
CG2258	glbO	395	396	0	0	1597	859	0.0004	-11.2877	9.01e-06	74844	0	18	0	2.3
CG2259	chrA	1130	1127	0	0	2763	3321	0.0002	-12.2877	0	592802	0	75	0	3.3
CG226	moaB	473	458	0	0	1764	1281	0.0003	-11.7027	0	95493	0	41	0	4.5
CG2260	cgp2691	629	630	0	0	174	175	0.0029	-8.42973	0.00075409	195300	0	10	0	0.8
CG2261	cgp2692	467	467	0	0	0	0	1	0		109044	0	0	0	0
CG2262	cgp2693	623	624	0	0	2105	838	0.0003	-11.7027	1e-08	185016	0	31	0	2.5
CG2263	cgp2694	164	165	0	0	140	459	0.0017	-9.20025	0.0006776	12787.5	0	10	0	3
CG2264	cgp2695	1670	1671	0	0	2	3	0.1667	-2.58467	0.0227178	1.39278e+06	0	4	0	0.1
CG2265	cgp2697	617	618	0	0	1624	1031	0.0004	-11.2877	0	180765	0	34	0	2.8
CG2266	cgp2699	2153	2154	0	0	16	26	0.0233	-5.42353	0.00712849	2313396	0	6	0	0.1
CG2267	cgpt5047	76	77	0	0	0	0	1	0		2964.5	0	0	0	0
CG2268	phoB	1421	1422	0	0	5578	5452	0.0001	-13.2877	0	930699	0	113	0	4
CG2269	cgpt5048	75	76	0	0	0	0	1	0		2888	0	0	0	0
CG227	moaC	470	471	0	0	2145	2807	0.0002	-12.2877	0	101265	0	41	0	4.4
CG2270	cgp2701	641	642	0	0	2674	2395	0.0002	-12.2877	0	189069	0	53	0	4.1
CG2271	cgp2703	914	915	0	0	3588	3427	0.0001	-13.2877	0	396195	0	51	0	2.8
CG2272	cgp2704	845	846	0	0	2818	3443	0.0002	-12.2877	0	335439	0	54	0	3.2
CG2273	cgp2705	1331	1332	0	156	5876	6853	0.0123	-6.3452	0	815214	1	113	0	4.2
CG2274	cgp2707	1244	1245	0	156	6208	5292	0.0137	-6.18968	0	717142	1	100	0	4
CG2275	msiK1	1130	1131	156	0	4350	4700	0.0173	-5.85308	0	588145	1	94	0	4.2
CG2276	cgp2709	743	738	156	0	3992	2531	0.0241	-5.37482	0	250198	1	63	0.1	4.3
CG2277	int3	692	693	0	0	2341	1915	0.0002	-12.2877	0	223146	0	50	0	3.6
CG2278	cgp2711	692	693	0	0	2772	1123	0.0003	-11.7027	0	225225	0	45	0	3.2
CG2279	cgp2712	563	482	0	0	1307	864	0.0005	-10.9658	0	108450	0	32	0	3.3
CG228	moeA1	1187	1188	0	312	2851	3745	0.0474	-4.39897	0	667105	2	68	0.1	2.9
CG2280	dhaS	626	627	0	0	1686	1781	0.0003	-11.7027	0	186219	0	33	0	2.6
CG2281	cgp2714	878	879	0	0	2720	3009	0.0002	-12.2877	0	362148	0	55	0	3.1
CG2282	cgp2715	1184	1185	0	0	3933	2789	0.0001	-13.2877	0	664785	0	63	0	2.7
CG2283	hyi	752	753	0	0	2160	2996	0.0002	-12.2877	0	262044	0	59	0	3.9
CG2284	cgp2717	800	801	0	0	186	0	0.0053	-7.55979	0.158958	320400	0	1	0	0.1
CG2285	ornA	659	660	0	0	2172	1732	0.0003	-11.7027	0	205590	0	38	0	2.9
CG2286	cgp2719	1244	1241	0	0	1733	1982	0.0003	-11.7027	0	736534	0	54	0	2.2
CG2287	lppS	1211	1212	779	312	6335	6092	0.0879	-3.50799	0	674577	3	103	0.1	4.2
CG2288	cgpt5049	75	76	0	0	0	0	1	0		2888	0	0	0	0
CG2289	cgpt5050	72	73	0	0	0	0	1	0		2664.5	0	0	0	0
CG229	modB	839	840	156	0	2909	3295	0.0253	-5.30472	0	331812	1	53	0.1	3.2
CG2290	cgp2722	647	648	0	0	2210	1483	0.0003	-11.7027	1e-08	199908	0	31	0	2.4
CG2291	cgp2724	152	149	0	0	527	580	0.0009	-10.1178	0.00118876	10430	0	9	0	3
CG2292	tnp1b	1310	1311	0	0	0	0	1	0		859360	0	0	0	0
CG2293	cgp2726	209	210	0	0	135	1	0.0073	-7.09789	0.0224933	21630	0	4	0	1
CG2294	cgp2727	641	638	0	0	3330	1992	0.0002	-12.2877	0	187572	0	51	0	4
CG2295	glsK	1241	1242	156	0	4443	2013	0.0243	-5.3629	0	727836	1	72	0	2.9
CG2296	cgp4010	311	148	0	0	476	0	0.0021	-8.89539	0.0414581	10730	0	3	0	1
CG2297	cgp2729	455	456	156	0	1294	1566	0.0549	-4.18705	1.1e-07	97592.5	1	30	0.1	3.3
CG2298	cgp2730	479	476	0	0	427	1125	0.0006	-10.7027	9.33e-06	109004	0	18	0	1.9
CG2299	uxaC	1556	1557	0	0	2561	4137	0.0001	-13.2877	0	1150623	0	80	0	2.6
CG23	cgp0029	995	992	0	0	3242	3555	0.0001	-13.2877	0	458800	0	68	0	3.4
CG230	modA	806	787	0	0	1673	2868	0.0002	-12.2877	0	294338	0	39	0	2.5
CG2300	gntV	503	504	312	0	544	1157	0.1839	-2.44301	1.468e-05	122230	1	21	0.1	2.1
CG2301	cgp2733	1166	1167	0	0	1507	2053	0.0003	-11.7027	0	658772	0	40	0	1.7
CG2302	pncA	560	561	0	0	1193	2018	0.0003	-11.7027	0	148384	0	32	0	2.9
CG2303	cgp2735	275	276	0	0	22	516	0.0019	-9.03978	0.00392064	37122	0	7	0	1.3
CG2304	bcp	476	477	0	0	983	1457	0.0004	-11.2877	2.1e-07	107802	0	25	0	2.6
CG2305	cgp2737	611	612	0	0	232	0	0.0043	-7.86145	0.0787344	186660	0	2	0	0.2
CG2306	ppt1	407	397	0	0	46	1	0.0208	-5.58727	0.0415674	78209	0	3	0	0.4
CG2307	cgp2739	1427	1428	0	0	3775	4387	0.0001	-13.2877	0	954618	0	91	0	3.2
CG2308	cgp2740	326	327	0	0	1392	844	0.0004	-11.2877	1.501e-05	50685	0	18	0	2.8
CG2309	cgp2741	407	408	0	0	1155	1339	0.0004	-11.2877	1.75e-06	78948	0	21	0	2.6
CG231	cgp0264	257	258	0	0	501	577	0.0009	-10.1178	0.00013274	31605	0	13	0	2.5
CG2310	fas-IA	8990	8991	0	0	640	669	0.0008	-10.2877	0	4.01493e+07	0	60	0	0.3
CG2311	cgp2745	206	207	0	0	596	1363	0.0005	-10.9658	4.21e-06	19458	0	19	0	4.6
CG2312	cgp2746	1184	1185	0	0	3891	5301	0.0001	-13.2877	0	654120	0	86	0	3.6
CG2313	cgp2747	575	576	0	0	876	1197	0.0005	-10.9658	7e-08	158112	0	28	0	2.4
CG2314	cgpt5051	84	85	0	0	0	0	1	0		3612.5	0	0	0	0
CG2315	cgp2748	464	465	0	0	10	128	0.0072	-7.11779	0.0125479	106950	0	5	0	0.5
CG2316	cgp2750	356	357	0	0	96	202	0.0033	-8.24332	0.01251	62832	0	5	0	0.7
CG2317	cgp2751	620	621	0	0	893	1527	0.0004	-11.2877	1e-08	183195	0	31	0	2.5
CG2318	rph	737	738	0	0	1703	1580	0.0003	-11.7027	0	259776	0	34	0	2.3
CG2319	cgp2755	248	249	0	0	1020	916	0.0005	-10.9658	4.54e-06	28635	0	19	0	3.8
CG232	cgp0265	914	911	0	156	2520	2674	0.0302	-5.04931	0	390377	1	55	0.1	3
CG2320	cgp2756	695	696	0	0	2601	525	0.0003	-11.7027	0	230724	0	33	0	2.4
CG2321	tnp15a	584	585	0	0	225	611	0.0012	-9.70275	0.00130745	168480	0	9	0	0.8
CG2322	cgp2758	1325	1326	0	0	2746	4391	0.0001	-13.2877	0	824109	0	84	0	3.2
CG2323	tnp15b	536	519	0	0	177	0	0.0056	-7.48036	0.0226461	133642	0	4	0	0.4
CG2324	cgp2760	629	630	0	0	2043	1449	0.0003	-11.7027	3e-08	189315	0	29	0	2.3
CG2325	cgp2761	767	768	0	0	841	1203	0.0005	-10.9658	0	279936	0	39	0	2.5
CG2326	murI	842	843	0	0	2	337	0.0029	-8.42973	0.0416017	354060	0	3	0	0.2
CG2327	cgp2765	620	621	0	0	2361	2187	0.0002	-12.2877	0	179780	0	43	0	3.5
CG2328	cgp2766	494	495	0	0	387	221	0.0016	-9.28771	8.3e-05	119048	0	14	0	1.4
CG2329	cgp2767	749	750	0	0	2547	1263	0.0003	-11.7027	0	265875	0	41	0	2.7
CG233	cgp0266	422	412	0	0	559	825	0.0007	-10.4804	1.02e-06	80340	0	22	0	2.7
CG2330	cgp2768	914	911	0	0	2846	2276	0.0002	-12.2877	0	390819	0	53	0	2.9
CG2331	cgp2770	539	539	0	0	810	1717	0.0004	-11.2877	5.54e-06	140140	0	19	0	1.8
CG2332	clpS	374	375	0	156	1629	3319	0.0317	-4.97937	0	63759	1	37	0.1	4.9
CG2333	cgp2773	551	552	0	0	2419	1954	0.0002	-12.2877	0	141312	0	41	0	3.7
CG2334	cgp2774	1340	1337	0	0	1336	1015	0.0004	-11.2877	0	861696	0	49	0	1.8
CG2335	cgp6023	110	111	0	0	479	0	0.0021	-8.89539	0.0222646	5938.5	0	4	0	1.8
CG2336	cgp2775	308	309	0	0	1112	568	0.0006	-10.7027	2.58e-05	45268.5	0	17	0	2.8
CG2337	dinG	1877	1862	156	0	3815	2019	0.0269	-5.21625	0	1669303	1	70	0	1.9
CG2338	cgp2777	893	894	0	0	3911	6002	0.0001	-13.2877	0	369669	0	70	0	3.9
CG2339	cgp2778	623	624	0	0	1816	656	0.0004	-11.2877	2e-08	185328	0	31	0	2.5
CG234	pat	1025	1026	0	0	2190	3182	0.0002	-12.2877	0	488376	0	76	0	3.7
CG2340	serB	1301	1302	156	156	1349	877	0.1405	-2.83136	0	815750	2	51	0.1	2
CG2341	ctaD	1754	1755	0	0	220	155	0.0027	-8.53282	3.056e-05	1.52597e+06	0	17	0	0.5
CG2342	nrdF	1004	1005	0	0	0	0	1	0		505012	0	0	0	0
CG2343	ftn	488	489	0	0	706	345	0.001	-9.96578	3.16e-06	114670	0	20	0	2
CG2344	gntR1	752	749	0	0	2450	1714	0.0002	-12.2877	0	264772	0	43	0	2.9
CG2345	cgp2784	662	663	0	0	1234	569	0.0006	-10.7027	3.9e-07	211828	0	24	0	1.8
CG2346	cgp2785	278	279	0	0	204	174	0.0026	-8.58727	0.0124645	38223	0	5	0	0.9
CG2347	nrdE	2147	2148	0	0	0	6	0.1429	-2.80692	0.0786738	2304804	0	2	0	0
CG2348	nrdI	446	447	0	0	46	119	0.006	-7.38082	0.0415747	99234	0	3	0	0.3
CG2349	cgp2788	110	111	0	0	277	538	0.0012	-9.70275	0.00668674	5827.5	0	6	0	2.7
CG235	cgpt5008	88	89	0	0	0	0	1	0		3960.5	0	0	0	0
CG2350	mrx2	233	234	0	0	0	274	0.0036	-8.11779	0.159692	27261	0	1	0	0.2
CG2351	rpmJ	122	123	0	0	0	60	0.0164	-5.93016	0.16063	7503	0	1	0	0.4
CG2352	nadE	833	834	156	0	0	268	0.5836	-0.776948	0.5	347778	1	1	0.1	0.1
CG2353	cgp2793	749	746	312	0	2667	2806	0.0572	-4.12784	0	258511	1	54	0.1	3.6
CG2354	cgp2794	413	414	0	0	1027	2079	0.0003	-11.7027	1e-08	79488	0	32	0	3.9
CG2355	cgp2795	1022	1023	0	0	1801	2233	0.0002	-12.2877	0	497178	0	52	0	2.5
CG2356	cgp2796	1373	1374	312	0	6497	4575	0.0283	-5.14305	0	873220	1	106	0	3.9
CG2357	cgp2797	836	837	0	0	649	1242	0.0005	-10.9658	0	336056	0	34	0	2
CG2358	cgpt5052	75	76	0	0	10	29	0.025	-5.32193	0.0793357	2812	0	2	0	1.3
CG2359	cgp2799	794	795	0	0	64	137	0.005	-7.64386	0.00131857	312435	0	9	0	0.6
CG236	cgpt5009	75	76	0	0	0	0	1	0		2888	0	0	0	0
CG2360	pgm	1664	1665	0	156	6515	6082	0.0125	-6.32193	0	1279590	1	134	0	4
CG2361	cgp2801	290	287	0	0	503	182	0.0015	-9.38082	1.455e-05	38745	0	17	0	3
CG2362	cgp2802	326	327	0	0	204	346	0.0018	-9.11779	0.00127466	51993	0	9	0	1.4
CG2363	cgp2803	794	795	0	0	2514	2235	0.0002	-12.2877	0	295342	0	55	0	3.5
CG2364	cgp2804	1367	1368	156	156	3889	4100	0.0392	-4.673	0	875574	2	91	0.1	3.3
CG2365	psp4	1622	1623	0	0	3550	4444	0.0001	-13.2877	0	1251333	0	81	0	2.5
CG2366	cgp2806	356	357	0	0	151	134	0.0035	-8.15843	0.00395545	62475	0	7	0	1
CG2367	tnp11a	449	450	0	0	1393	894	0.0004	-11.2877	1.595e-05	97425	0	17	0	1.9
CG2368	tnp13a	1403	1404	0	0	0	0	1	0		985608	0	0	0	0
CG2369	cgp2809	716	717	0	0	480	1178	0.0006	-10.7027	3.9e-07	248440	0	26	0	1.8
CG237	cgp0269	908	909	0	0	1329	1290	0.0004	-11.2877	0	396324	0	38	0	2.1
CG2370	cgp2810	1397	1398	0	0	4918	4962	0.0001	-13.2877	0	905205	0	105	0	3.8
CG2371	cgp2811	2561	2562	0	0	906	3368	0.0002	-12.2877	0	3196095	0	67	0	1.3
CG2372	cgp2812	854	854	0	0	339	603	0.0011	-9.82828	1.72e-05	357399	0	17	0	1
CG2373	cgpr5107	119	120	0	0	0	0	1	0		7200	0	0	0	0
CG2374	cgpr5131	3086	3087	0	0	0	0	1	0		4.76478e+06	0	0	0	0
CG2375	cgpr5119	1523	1524	0	0	0	0	1	0		1161288	0	0	0	0
CG2376	cgp2822	680	681	0	156	7740	6745	0.0108	-6.53282	0	198870	1	103	0.1	7.6
CG2377	cgp2823	674	675	0	0	4582	5109	0.0001	-13.2877	0	201488	0	80	0	5.9
CG2378	cgp2824	527	528	0	0	1009	79	0.0009	-10.1178	9.49e-06	134640	0	18	0	1.7
CG2379	cgpr5109	119	120	0	0	0	0	1	0		7200	0	0	0	0
CG238	cgp0270	284	285	0	0	899	617	0.0007	-10.4804	8.32e-06	38047.5	0	18	0	3.2
CG2380	cgpr5133	3086	3087	0	0	0	0	1	0		4.76478e+06	0	0	0	0
CG2381	cgpr5121	1523	1524	0	0	0	0	1	0		1161288	0	0	0	0
CG2382	cgp2828	197	198	0	0	0	0	1	0		19602	0	0	0	0
CG2383	murA2	1256	1257	0	0	107	0	0.0093	-6.74855	0.158848	789396	0	1	0	0
CG2384	pduO	572	573	312	0	4048	2105	0.0509	-4.29619	0	151863	1	44	0.1	3.8
CG2385	ramA	845	846	0	0	190	701	0.0011	-9.82828	2.02e-06	348975	0	21	0	1.2
CG2386	cysK	935	936	0	0	0	0	1	0		438048	0	0	0	0
CG2387	cysE	566	567	0	0	6	16	0.0435	-4.52284	0.0787412	160178	0	2	0	0.2
CG2388	cgp2835	290	291	0	0	170	341	0.002	-8.96578	0.00013521	40449	0	14	0	2.4
CG2389	cgpt5053	75	76	0	0	0	0	1	0		2888	0	0	0	0
CG239	cgp0272	764	765	0	0	5855	5748	0.0001	-13.2877	0	263925	0	78	0	5.1
CG2390	cgpt5054	73	74	0	0	0	0	1	0		2738	0	0	0	0
CG2391	sucD	884	885	0	0	3257	2401	0.0002	-12.2877	0	363735	0	65	0	3.7
CG2392	sucC	1208	1209	0	0	2842	3404	0.0002	-12.2877	0	693966	0	62	0	2.6
CG2393	cgpt5055	73	74	0	0	0	0	1	0		2738	0	0	0	0
CG2394	cgpt5056	75	76	0	0	0	0	1	0		2888	0	0	0	0
CG2395	cgp2838	737	738	0	156	3300	2333	0.0279	-5.16359	0	254993	1	49	0.1	3.3
CG2396	cgp2839	821	822	156	0	3583	3373	0.0226	-5.46753	0	312784	1	64	0.1	3.9
CG2397	cgpt5057	72	73	0	0	0	0	1	0		2664.5	0	0	0	0
CG2398	actA	1508	1509	0	156	5144	6987	0.0129	-6.27649	0	1052557	1	115	0	3.8
CG2399	cgp2841	1145	1146	156	0	6502	5740	0.0128	-6.28771	0	591368	1	117	0	5.1
CG24	cgp0031	176	177	0	0	0	883	0.0011	-9.82828	0.0789434	15487.5	0	2	0	0.6
CG240	cgp0273	1019	1019	0	0	2452	1063	0.0003	-11.7027	0	496762	0	44	0	2.2
CG2400	phoU	734	735	0	0	3857	3183	0.0001	-13.2877	0	248430	0	61	0	4.1
CG2401	pstB	773	774	156	0	3856	2995	0.0229	-5.44851	0	274401	1	69	0.1	4.5
CG2402	pstA	923	924	312	156	3647	3277	0.0677	-3.8847	0	391838	2	81	0.1	4.4
CG2403	pstC	1067	1068	0	0	3964	3178	0.0001	-13.2877	0	530262	0	79	0	3.7
CG2404	pstS	1127	1128	0	156	4698	3405	0.0194	-5.6878	0	588840	1	88	0	3.9
CG2405	mshD	878	879	0	156	2120	2748	0.0322	-4.9568	0	363921	1	52	0.1	3
CG2406	cgp2848	785	786	0	0	1543	1004	0.0004	-11.2877	0	294750	0	36	0	2.3
CG2407	cgp2849	1076	1073	0	0	3071	2764	0.0002	-12.2877	0	540792	0	66	0	3.1
CG2408	cgp2850	689	690	0	0	0	0	1	0		238050	0	0	0	0
CG2409	cgp2851	944	945	156	0	2737	2302	0.0312	-5.00231	0	417710	1	63	0.1	3.3
CG241	cgp0274	803	804	0	0	2170	1841	0.0002	-12.2877	0	303510	0	49	0	3
CG2410	cgp2852	1103	1104	0	0	562	889	0.0007	-10.4804	0.00403642	605544	0	7	0	0.3
CG2411	cgp2853	215	216	0	0	131	1	0.0075	-7.05889	0.0788902	23112	0	2	0	0.5
CG2412	cgp2854	1514	1515	0	0	0	0	1	0		1.14761e+06	0	0	0	0
CG2413	purM	1076	1077	0	0	163	587	0.0013	-9.58727	4.2e-07	567040	0	24	0	1.1
CG2414	purF	1547	1548	0	0	608	508	0.0009	-10.1178	0	1172610	0	33	0	1.1
CG2415	cgp2859	377	378	0	0	573	749	0.0008	-10.2877	1.71e-06	67473	0	21	0	2.8
CG2416	cgp2860	1019	1020	0	0	2505	2167	0.0002	-12.2877	0	485010	0	70	0	3.4
CG2417	cgp2861	764	765	0	0	2221	2892	0.0002	-12.2877	0	272340	0	54	0	3.5
CG2418	purL	2288	2289	156	0	1068	1414	0.0632	-3.98393	0	2545399	1	68	0	1.5
CG2419	purQ	671	672	0	0	544	270	0.0012	-9.70275	2.3e-07	217392	0	25	0	1.9
CG242	mgtE2	1310	1311	0	0	2307	2997	0.0002	-12.2877	0	812820	0	72	0	2.7
CG2420	cgp2865	245	242	0	0	47	206	0.0039	-8.00231	0.0124326	28677	0	5	0	1
CG2421	gpx	479	480	0	0	1747	1014	0.0004	-11.2877	0	106560	0	36	0	3.8
CG2422	nuc	2750	2751	312	0	9779	9354	0.0164	-5.93016	0	3529628	2	188	0	3.4
CG2423	cgp2869	689	690	0	0	1481	985	0.0004	-11.2877	0	223905	0	41	0	3
CG2424	dctA	1340	1341	0	0	3951	3557	0.0001	-13.2877	0	850864	0	74	0	2.8
CG2425	ptrB	2120	2121	0	0	5333	6284	0.0001	-13.2877	0	2129484	0	114	0	2.7
CG2426	purC	893	894	0	156	1	112	1.3772	0.461738	0.282397	399172	1	2	0.1	0.1
CG2427	cgp2875	116	117	0	100024	5	657	150.867	7.23714	0.460699	6866	7	7	3	3
CG2428	purB	1430	1431	0	0	1	0	0.5	-1	0.158824	1023165	0	1	0	0
CG2429	cgp2877	1151	1152	26330	0	3933	3832	3.3905	1.7615	0	630763	2	61	0.1	2.6
CG243	dccT	1583	1584	0	0	7313	4818	0.0001	-13.2877	0	1169784	0	109	0	3.4
CG2430	purD	1265	1266	0	0	1289	1763	0.0003	-11.7027	0	759600	0	66	0	2.6
CG2431	cgp2880	410	411	0	0	923	1613	0.0004	-11.2877	1e-08	78295.5	0	32	0	3.9
CG2432	cgp2883	755	756	0	0	712	766	0.0007	-10.4804	3e-08	274806	0	29	0	1.9
CG2433	cgp2884	1445	1446	0	0	3725	5443	0.0001	-13.2877	0	982557	0	89	0	3.1
CG2434	bioA	1271	1272	0	0	4142	3793	0.0001	-13.2877	0	761928	0	74	0	2.9
CG2435	bioD	674	652	0	0	1567	1064	0.0004	-11.2877	0	201794	0	33	0	2.5
CG2436	cgtS3	1457	1458	312	0	3428	4236	0.0408	-4.61529	0	1000246	2	89	0.1	3.1
CG2437	cgtR3	707	708	0	0	2380	1305	0.0003	-11.7027	0	235056	0	44	0	3.1
CG2438	cgp2889	755	756	0	0	2473	1998	0.0002	-12.2877	0	271782	0	38	0	2.5
CG2439	cgp2890	1031	1032	0	0	3726	4222	0.0001	-13.2877	0	489684	0	85	0	4.1
CG244	cgpt5010	72	73	0	0	0	0	1	0		2664.5	0	0	0	0
CG2440	pqo	1739	1736	0	0	4890	7635	0.0001	-13.2877	0	1411368	0	115	0	3.3
CG2441	cgp2892	176	177	0	0	276	109	0.0026	-8.58727	0.00685862	15133.5	0	6	0	1.7
CG2442	cgp2893	1484	1474	0	0	2484	3095	0.0002	-12.2877	0	1042855	0	61	0	2.1
CG2443	cgp2894	533	534	0	0	921	196	0.0009	-10.1178	0.00014426	139107	0	13	0	1.2
CG2444	cgp2895	1322	1323	0	0	2623	3304	0.0002	-12.2877	0	831506	0	67	0	2.5
CG2445	cgp2896	2144	2145	0	156	7539	8175	0.01	-6.64386	0	2138607	1	154	0	3.6
CG2446	cgp2898	950	951	312	156	3466	4294	0.0604	-4.04931	0	426090	3	59	0.2	3.1
CG2447	cgp2899	707	708	0	0	459	1442	0.0005	-10.9658	3.9e-07	242136	0	24	0	1.7
CG2448	ddh	962	963	0	0	4608	3052	0.0001	-13.2877	0	437202	0	55	0	2.9
CG2449	cgp2901	815	816	0	0	1300	1555	0.0004	-11.2877	1e-08	320280	0	31	0	1.9
CG245	tyrA	1022	1023	0	0	1	344	0.0029	-8.42973	0.00403334	519684	0	7	0	0.3
CG2450	cgp2902	815	802	0	0	1127	2127	0.0003	-11.7027	0	302755	0	48	0	3
CG2451	cgp2903	431	432	0	0	1386	1426	0.0004	-11.2877	0	86184	0	34	0	3.9
CG2452	cgp2904	401	402	0	0	805	578	0.0007	-10.4804	9.04e-06	77184	0	18	0	2.2
CG2453	cgpt5058	75	76	0	0	0	0	1	0		2888	0	0	0	0
CG2454	thrE	1469	1470	0	0	4540	2073	0.0002	-12.2877	0	1018710	0	85	0	2.9
CG2455	cgp2906	329	330	156	156	65	10	4.1184	2.04208	0.209423	54124	2	4	0.3	0.6
CG2456	otsA	1457	1454	1092	780	7	378	4.8523	2.27867	0.270289	1054932	10	13	0.3	0.4
CG2457	cgp2908	488	489	0	0	655	750	0.0007	-10.4804	2.784e-05	115648	0	16	0	1.6
CG2458	otsB	770	771	0	0	16	2	0.0526	-4.24879	0.0415989	296064	0	3	0	0.2
CG2459	cgp2910	1082	1083	0	156	3463	3688	0.022	-5.50635	0	545853	1	79	0	3.6
CG246	cgp0280	494	494	0	0	601	341	0.0011	-9.82828	1.618e-05	117819	0	17	0	1.7
CG2460	cgp2911	944	945	0	0	2292	3418	0.0002	-12.2877	0	414382	0	69	0	3.7
CG2461	cgp2912	692	693	0	0	2312	1882	0.0002	-12.2877	0	225918	0	41	0	3
CG2462	cgp2913	881	882	0	0	3357	3149	0.0002	-12.2877	0	364707	0	57	0	3.2
CG2463	tnp5b	1502	1503	0	0	0	0	1	0		1.1295e+06	0	0	0	0
CG2464	cgp2915	203	204	0	0	1	84	0.0116	-6.42973	0.0789044	20604	0	2	0	0.5
CG2465	ksdD	1691	1692	156	468	7095	8633	0.0397	-4.65472	0	1330016	4	126	0.1	3.7
CG2466	cgp2917	749	750	0	0	2244	1169	0.0003	-11.7027	0	266250	0	40	0	2.7
CG2467	cgp2918	620	621	312	156	2507	1099	0.13	-2.94342	6e-08	183215	2	33	0.2	2.7
CG2468	cgp2919	437	418	0	0	1482	1617	0.0003	-11.7027	2e-08	81301	0	29	0	3.5
CG2469	cgp2920	857	858	0	0	2491	2216	0.0002	-12.2877	0	348348	0	47	0	2.7
CG247	cgp0281	479	480	0	0	0	0	1	0		115200	0	0	0	0
CG2470	cgp2921	428	429	0	0	1185	830	0.0005	-10.9658	5.9e-07	87087	0	23	0	2.7
CG2471	cgp2922	656	657	0	0	1269	480	0.0006	-10.7027	3.33e-06	209254	0	20	0	1.5
CG2472	cgp2923	941	942	0	0	0	208	0.0048	-7.70275	0.158912	443211	0	1	0	0.1
CG2473	cysS	1382	1383	0	0	3	2	0.1667	-2.58467	0.0227111	953578	0	4	0	0.1
CG2474	ptsS	1985	1986	468	0	6680	6657	0.0352	-4.82828	0	1.82723e+06	2	149	0.1	3.8
CG2475	scrB	1289	1290	0	0	6425	5053	0.0001	-13.2877	0	770775	0	96	0	3.7
CG2476	nagB	761	762	156	0	4462	5925	0.0151	-6.04931	0	256812	1	92	0.1	6
CG2477	nagA1	1166	1167	0	156	2823	2240	0.031	-5.01159	0	648287	1	58	0	2.5
CG2478	nanA	938	939	0	0	3161	2712	0.0002	-12.2877	0	415038	0	55	0	2.9
CG2479	cgp2932	911	912	156	156	2459	3779	0.0502	-4.31617	0	382637	2	78	0.1	4.3
CG248	cgp0282	203	204	0	0	1687	1820	0.0003	-11.7027	1.31e-05	19074	0	17	0	4.2
CG2480	nanE	698	699	0	0	2365	2215	0.0002	-12.2877	0	229622	0	45	0	3.2
CG2481	cgp2934	179	180	0	0	318	412	0.0014	-9.48036	0.0003875	15210	0	11	0	3.1
CG2482	nanP	1217	1207	156	0	4585	3211	0.0201	-5.63666	0	684995	1	74	0	3.1
CG2483	cgp2936	722	723	0	0	1358	2490	0.0003	-11.7027	0	246904	0	40	0	2.8
CG2484	cgp2937	1610	1611	156	0	4709	7956	0.0124	-6.33352	0	1206671	1	117	0	3.6
CG2485	cgp2938	965	966	0	156	2335	2809	0.0305	-5.03505	0	439550	1	57	0.1	3
CG2486	cgp2939	2003	2004	0	0	5172	7575	0.0001	-13.2877	0	1881756	0	127	0	3.2
CG2487	cgp2940	818	815	0	0	2281	2590	0.0002	-12.2877	0	312960	0	48	0	2.9
CG2488	cgp2941	623	624	0	0	2608	2159	0.0002	-12.2877	0	181272	0	44	0	3.5
CG2489	cgp2942	500	501	0	0	2106	2655	0.0002	-12.2877	0	117484	0	32	0	3.2
CG249	cgpt5011	90	91	0	0	1	0	0.5	-1	0.161329	4095	0	1	0	0.5
CG2490	cgp2943	362	363	0	0	210	618	0.0012	-9.70275	8.011e-05	63343.5	0	14	0	1.9
CG2491	ispF	482	483	0	0	175	3	0.0056	-7.48036	0.0226383	115678	0	4	0	0.4
CG2492	ispD	770	763	0	0	2	1	0.25	-2	0.0415985	289940	0	3	0	0.2
CG2493	cgp2946	596	597	0	0	1	1	0.3333	-1.58511	0.0787365	177608	0	2	0	0.2
CG2494	cgtR5	725	722	0	0	3345	3918	0.0001	-13.2877	0	237177	0	66	0	4.6
CG2495	cgtS5	1118	1119	0	0	2960	4628	0.0001	-13.2877	0	584118	0	75	0	3.4
CG2496	cgp2949	569	570	0	0	608	244	0.0012	-9.70275	0.00014497	158745	0	13	0	1.1
CG2497	radA	1394	1395	0	0	3218	2270	0.0002	-12.2877	0	924188	0	70	0	2.5
CG2498	cgp2951	1100	1092	0	0	3606	2976	0.0002	-12.2877	0	564564	0	60	0	2.7
CG2499	cgp2952	680	681	0	0	1598	1562	0.0003	-11.7027	1e-08	220984	0	32	0	2.3
CG25	cgp0033	101	102	0	0	126	640	0.0013	-9.58727	0.00366525	4845	0	7	0	3.4
CG250	cgp0283	251	252	0	0	0	606	0.0016	-9.28771	0.00694549	30996	0	6	0	1.2
CG2500	cgp2953	1454	1455	0	0	2616	4443	0.0001	-13.2877	0	1.00613e+06	0	76	0	2.6
CG2501	cynT	623	624	0	0	109	1	0.009	-6.79586	0.0226636	193440	0	4	0	0.3
CG2502	mutY	881	882	0	0	3790	2330	0.0002	-12.2877	0	361620	0	62	0	3.5
CG2503	cgp2956	1157	1158	0	0	2272	3220	0.0002	-12.2877	0	638058	0	58	0	2.5
CG2504	cgp2957	173	174	0	0	208	2	0.0047	-7.73312	0.00383161	14529	0	7	0	2
CG2505	butA	776	777	0	0	1993	1209	0.0003	-11.7027	0	287102	0	38	0	2.4
CG2506	cgp2959	326	327	0	156	567	1611	0.0721	-3.79386	2.55e-06	49875	1	24	0.2	3.7
CG2507	cgp2960	743	744	0	0	479	786	0.0008	-10.2877	2e-08	265608	0	30	0	2
CG2508	cgp2962	293	294	0	0	186	766	0.001	-9.96578	0.00023633	41454	0	12	0	2
CG2509	clpC	2777	2778	0	312	220	532	0.4157	-1.26639	0.00080112	3840596	2	15	0	0.3
CG251	cgp0284	2405	2406	467	0	5567	4651	0.0458	-4.44851	0	2744106	1	130	0	2.7
CG2510	guaB1	1433	1434	0	156	3599	4174	0.0202	-5.6295	0	970126	1	83	0	2.9
CG2511	cgp2965	1013	1014	468	0	2197	2703	0.0957	-3.38534	0	490303	2	50	0.1	2.5
CG2512	cgp2966	1883	1884	0	156	4806	6128	0.0144	-6.11779	0	1.65984e+06	1	126	0	3.3
CG2513	cgp2968	1718	1719	0	0	3243	2749	0.0002	-12.2877	0	1411299	0	79	0	2.3
CG2514	cgp2969	1943	1944	0	0	8004	6662	0.0001	-13.2877	0	1755432	0	141	0	3.6
CG2515	cgp2970	1724	1725	0	0	5033	2065	0.0001	-13.2877	0	1.43089e+06	0	67	0	1.9
CG2516	lmrB	1445	1446	0	0	3140	1867	0.0002	-12.2877	0	997017	0	68	0	2.4
CG2517	cgp2973	953	954	0	0	2512	2861	0.0002	-12.2877	0	430254	0	52	0	2.7
CG2518	lysS	1580	1581	0	0	1	2	0.25	-2	0.041616	1247409	0	3	0	0.1
CG2519	cgp2975	800	797	0	0	2548	1726	0.0002	-12.2877	0	296086	0	56	0	3.5
CG252	tgt	1256	1257	0	0	4138	1993	0.0002	-12.2877	0	734088	0	92	0	3.7
CG2520	cgp2976	695	695	0	0	2128	2654	0.0002	-12.2877	0	224832	0	49	0	3.5
CG2521	cgp2977	749	750	0	0	1618	1146	0.0004	-11.2877	2e-08	270000	0	30	0	2
CG2522	cgp2978	476	477	0	0	645	992	0.0006	-10.7027	2.1e-07	107802	0	25	0	2.6
CG2523	folK	479	479	0	0	620	631	0.0008	-10.2877	0.00398581	113044	0	7	0	0.7
CG2524	folX	392	385	0	0	311	152	0.0022	-8.82828	0.0415654	73535	0	3	0	0.4
CG2525	folP1	854	855	0	0	1	0	0.5	-1	0.158938	365085	0	1	0	0.1
CG2526	folE	605	606	0	0	0	0	1	0		183618	0	0	0	0
CG2527	ftsH	2561	2539	0	0	3243	3046	0.0002	-12.2877	0	3074729	0	119	0	2.3
CG2528	hpt	602	603	0	0	109	0	0.0091	-6.77992	0.159057	181503	0	1	0	0.1
CG2529	tilS	944	945	0	0	136	0	0.0073	-7.09789	0.041605	445095	0	3	0	0.2
CG253	cgp0286	740	719	156	0	2454	1085	0.0444	-4.4933	1e-08	246987	1	33	0.1	2.3
CG2530	dacB	1283	1284	0	0	4087	8336	0.0001	-13.2877	0	767190	0	92	0	3.6
CG2531	ppa	476	477	0	0	90	4	0.0105	-6.57347	0.022637	112810	0	4	0	0.4
CG2532	cgp2990	1541	1542	156	0	5418	4603	0.0157	-5.99309	0	1.1226e+06	1	89	0	2.9
CG2533	cgp2991	425	413	0	0	883	1164	0.0005	-10.9658	2e-08	79296	0	29	0	3.5
CG2534	cgp2992	413	414	0	0	1941	826	0.0004	-11.2877	2e-08	79695	0	29	0	3.5
CG2535	cgp2993	500	497	0	0	1753	1268	0.0003	-11.7027	2e-08	116298	0	30	0	3
CG2536	cgp2994	611	608	0	0	746	2285	0.0003	-11.7027	3e-08	176016	0	29	0	2.4
CG2537	ptsX'	251	140	0	0	59	243	0.0033	-8.24332	0.00377364	9310	0	7	0	2.5
CG2538	ptsX	266	267	156	0	476	1040	0.1035	-3.2723	0.00011437	33646	1	16	0.2	3
CG2539	cgp2999	1235	1236	0	0	4545	5365	0.0001	-13.2877	0	711936	0	88	0	3.6
CG254	cgp0287	1082	1083	0	0	2478	3195	0.0002	-12.2877	0	560994	0	48	0	2.2
CG2540	cgp3000	290	291	0	0	928	1269	0.0005	-10.9658	1.57e-06	39285	0	22	0	3.8
CG2541	cgp3001	446	447	0	0	224	368	0.0017	-9.20025	1.593e-05	96105	0	17	0	1.9
CG2542	cgp3003	3887	3888	0	312	15303	12190	0.0114	-6.45482	0	7095740	2	248	0	3.2
CG2543	gabD1	1565	1566	156	0	3332	4537	0.0199	-5.65109	0	1162783	1	82	0	2.6
CG2544	cgp3007	899	900	0	0	3609	4205	0.0001	-13.2877	0	367200	0	86	0	4.8
CG2545	porA	137	138	0	156	0	8	17.4444	4.12469	0.5	9522.5	1	1	0.4	0.4
CG2546	porH	173	174	623	623	142	223	3.4071	1.76854	0.0804742	14796	2	6	0.6	1.7
CG2547	groEL	1646	1647	0	0	0	250	0.004	-7.96578	0.0786811	1.35466e+06	0	2	0	0.1
CG2548	cgp3012	182	183	0	0	221	665	0.0011	-9.82828	0.00216022	16012.5	0	9	0	2.5
CG2549	cgp3013	1211	1204	0	0	4391	3721	0.0001	-13.2877	0	673638	0	88	0	3.7
CG255	cgp0288	1439	1432	0	0	2697	3826	0.0002	-12.2877	0	966600	0	82	0	2.9
CG2550	cgp3014	965	966	0	0	3079	2221	0.0002	-12.2877	0	438564	0	58	0	3
CG2551	cgp3015	1964	1961	0	312	3916	6072	0.0313	-4.99769	0	1826714	1	100	0	2.5
CG2552	cgp3016	2456	2457	0	0	5369	6122	0.0001	-13.2877	0	2.82432e+06	0	158	0	3.2
CG2553	cgp3017	2801	2801	0	312	6626	9937	0.0189	-5.72547	0	3.69322e+06	2	169	0	3
CG2554	cgp3018	3593	3594	0	467	14836	15157	0.0156	-6.00231	0	5.98054e+06	1	272	0	3.8
CG2555	cgp3019	2681	2682	0	156	6792	7289	0.0111	-6.4933	0	3380712	1	166	0	3.1
CG2556	cgp3020	614	608	0	0	1781	1353	0.0003	-11.7027	0	173888	0	38	0	3.1
CG2557	tpdA	1373	1374	156	156	8331	7152	0.0202	-5.6295	0	854702	2	137	0.1	5
CG2558	cgp3022	560	561	0	0	2196	2033	0.0002	-12.2877	0	146421	0	40	0	3.6
CG2559	mrpA	3059	3060	0	0	9584	7876	0.0001	-13.2877	0	4437000	0	166	0	2.7
CG256	gltX	881	882	0	623	931	2269	0.1949	-2.35919	0	368700	1	47	0.1	2.7
CG2560	mrpC	491	484	0	0	327	770	0.0009	-10.1178	1.613e-05	113014	0	17	0	1.8
CG2561	mrpD	1700	1701	0	156	6125	7110	0.0119	-6.39289	0	1340416	1	128	0	3.8
CG2562	mrpE	509	506	0	0	1322	1711	0.0003	-11.7027	0	118910	0	37	0	3.7
CG2563	mrpF	275	276	0	0	823	257	0.0009	-10.1178	7.679e-05	36156	0	14	0	2.5
CG2564	mrpG	380	381	0	0	1306	2084	0.0003	-11.7027	4e-08	67246.5	0	28	0	3.7
CG2565	cgp3030	599	600	0	0	1334	1487	0.0004	-11.2877	4e-08	171600	0	28	0	2.3
CG2566	cgp3031	1130	1131	0	156	1913	2243	0.0378	-4.72547	0	610194	1	54	0	2.4
CG2567	cgp3032	593	594	0	156	1868	1959	0.041	-4.60823	0	163662	1	44	0.1	3.7
CG2568	cgp3033	212	213	0	0	344	494	0.0012	-9.70275	0.00039748	21513	0	11	0	2.6
CG2569	def1	581	571	312	0	220	169	0.8026	-0.317247	0.00110444	159886	1	12	0.1	1.1
CG257	cgp0291	992	986	0	0	2870	4197	0.0001	-13.2877	0	451095	0	72	0	3.7
CG2570	cgp3035	1007	1008	0	156	2861	2801	0.0277	-5.17397	0	478313	1	60	0	3
CG2571	xthA	791	792	0	0	784	885	0.0006	-10.7027	1e-08	300960	0	32	0	2
CG2572	cls	1502	1503	0	0	1169	1995	0.0003	-11.7027	0	1079154	0	70	0	2.3
CG2573	cgp3038	1196	1197	156	156	2900	4842	0.0404	-4.6295	0	669168	2	83	0.1	3.5
CG2574	cgp3039	1310	1311	156	0	2105	2130	0.0371	-4.75244	0	824638	1	55	0	2.1
CG2575	cgp3040	842	839	156	0	1758	2509	0.0368	-4.76415	0	328489	1	57	0.1	3.4
CG2576	cgp3041	758	759	467	0	2717	1754	0.1047	-3.25567	0	272501	1	46	0.1	3
CG2577	cgp3042	932	925	0	0	3139	3603	0.0001	-13.2877	0	397750	0	65	0	3.5
CG2578	cgp3043	494	495	156	0	1740	2829	0.0344	-4.86145	0	111141	1	47	0.1	4.7
CG2579	cgp3044	1505	1506	0	0	1361	913	0.0004	-11.2877	0	1088838	0	61	0	2
CG258	tnp16a	1160	1161	0	0	30	203	0.0043	-7.86145	0.0786943	672800	0	2	0	0.1
CG2580	cgp3045	1034	1024	0	156	1461	832	0.0684	-3.86986	0	505870	1	37	0	1.8
CG2581	pknG	2468	2469	0	156	761	1416	0.0721	-3.79386	0	2985044	1	52	0	1.1
CG2582	ackA	1193	1194	156	0	2390	1983	0.0359	-4.79987	0	681792	1	53	0	2.2
CG2583	pta	1385	1385	0	0	4953	3916	0.0001	-13.2877	0	897480	0	90	0	3.2
CG2584	fpr1	1367	1368	0	0	205	1	0.0048	-7.70275	0.0786875	934344	0	2	0	0.1
CG2585	cgp3050	548	537	0	0	2191	1207	0.0003	-11.7027	0	134250	0	39	0	3.6
CG2586	cgp3051	1010	1011	65435	0	2523	906	19.0776	4.25381	0	491377	2	41	0.1	2
CG2587	cgp3052	1031	1032	0	0	2437	2443	0.0002	-12.2877	0	505164	0	54	0	2.6
CG2588	cgp3053	401	402	0	0	1885	1584	0.0003	-11.7027	1e-08	74571	0	32	0	4
CG2589	purT	1226	1227	0	0	2256	2705	0.0002	-12.2877	0	717182	0	58	0	2.4
CG259	cgp0293	305	306	0	0	0	0	1	0		46818	0	0	0	0
CG2590	cgp3057	767	768	0	0	2591	1652	0.0002	-12.2877	0	275712	0	51	0	3.3
CG2591	tnp8b	896	897	0	0	2414	1352	0.0003	-11.7027	0	387504	0	33	0	1.8
CG2592	tnp8a	269	270	0	0	559	548	0.0009	-10.1178	1.432e-05	34155	0	19	0	3.5
CG2593	cgtS6	1142	1143	0	0	1145	1300	0.0004	-11.2877	0	631508	0	38	0	1.7
CG2594	cgtR6	620	621	0	0	481	1313	0.0006	-10.7027	2.2e-07	185058	0	25	0	2
CG2595	purA	1292	1293	0	0	559	426	0.001	-9.96578	3e-08	817176	0	29	0	1.1
CG2596	cgp3065	851	852	0	0	2	0	0.3333	-1.58511	0.0787105	362100	0	2	0	0.1
CG2597	cgp3066	266	263	0	0	165	558	0.0014	-9.48036	0.00023302	33006.5	0	12	0	2.3
CG2598	cgp3067	1169	1170	0	0	3098	3226	0.0002	-12.2877	0	644670	0	71	0	3
CG2599	fda	1034	1035	0	0	396	0	0.0025	-8.64386	0.022698	533542	0	4	0	0.2
CG26	cgp0034	530	531	0	0	1191	1326	0.0004	-11.2877	0	131954	0	34	0	3.2
CG260	cgpt5012	87	88	0	0	0	0	1	0		3872	0	0	0	0
CG2600	cgp3069	1217	1218	156	624	11690	10174	0.0357	-4.80793	0	688857	4	93	0.2	3.8
CG2601	cgp3070	668	669	0	156	1411	2680	0.0384	-4.70275	0	211415	1	41	0.1	3.1
CG2602	pyrE	554	541	0	0	1	1	0.3333	-1.58511	0.0787455	145800	0	2	0	0.2
CG2603	cgp3072	1340	1341	0	0	3085	3122	0.0002	-12.2877	0	850864	0	72	0	2.7
CG2604	sseA1	824	825	0	0	1515	1374	0.0003	-11.7027	0	326700	0	34	0	2.1
CG2605	cgp3074	722	723	0	156	1795	2191	0.0394	-4.66566	0	247278	1	41	0.1	2.8
CG2606	cmr	1379	1380	0	0	3587	4321	0.0001	-13.2877	0	897000	0	81	0	2.9
CG2607	cgp3077	281	282	0	0	167	107	0.0036	-8.11779	0.00392391	38775	0	7	0	1.2
CG2608	cgp3078	401	402	0	0	1361	4152	0.0002	-12.2877	5.8e-07	76179	0	25	0	3.1
CG2609	clpB	2558	2559	156	0	8475	10180	0.0084	-6.89539	0	3049094	1	179	0	3.5
CG261	aspT	1280	1281	0	0	184	345	0.0019	-9.03978	0.00025895	812794	0	12	0	0.5
CG2610	cgp3080	1349	1350	0	156	1779	4325	0.0257	-5.28209	0	857278	1	81	0	3
CG2611	cgp3081	119	120	0	0	1	101	0.0097	-6.6878	0.0223009	6960	0	4	0	1.7
CG2612	cgp3082	371	368	0	0	529	1425	0.0005	-10.9658	1.539e-05	64584	0	17	0	2.3
CG2613	cgp3083	1022	1023	0	0	2474	2675	0.0002	-12.2877	0	497178	0	53	0	2.6
CG2614	cgp3084	1172	1173	0	0	2107	2617	0.0002	-12.2877	0	659812	0	49	0	2.1
CG2615	cgp3085	1043	1044	0	0	2625	2465	0.0002	-12.2877	0	514692	0	58	0	2.8
CG2616	cgp3086	1148	1145	0	0	3736	4773	0.0001	-13.2877	0	608568	0	84	0	3.7
CG2617	cgp3087	569	570	0	0	2347	2685	0.0002	-12.2877	0	151335	0	40	0	3.5
CG2618	arr'	242	239	0	0	1067	299	0.0007	-10.4804	4.258e-05	26768	0	15	0	3.1
CG2619	arr	185	186	0	0	268	98	0.0027	-8.53282	0.00687247	16740	0	6	0	1.6
CG262	cgp0295	632	633	0	0	1263	1861	0.0003	-11.7027	2e-08	190850	0	32	0	2.5
CG2620	cgp3090	1127	1128	0	0	0	279	0.0036	-8.11779	0.0786956	635064	0	2	0	0.1
CG2621	cgp3091	809	769	0	0	1145	959	0.0005	-10.9658	2e-08	284146	0	30	0	2
CG2622	cgp3092	1157	1158	0	0	1031	1477	0.0004	-11.2877	0	650217	0	35	0	1.5
CG2623	cgp3093	800	801	0	0	1444	1651	0.0003	-11.7027	0	303980	0	42	0	2.6
CG2624	cgp3094	245	246	0	0	277	344	0.0016	-9.28771	0.00220504	29274	0	9	0	1.8
CG2625	cgp3095	1136	1136	0	0	4118	2723	0.0001	-13.2877	0	611168	0	60	0	2.6
CG2626	ald	1520	1521	0	0	3619	3470	0.0001	-13.2877	0	1096641	0	81	0	2.7
CG2627	hspR	440	441	0	0	4	57	0.0161	-5.9568	0.0226278	96358.5	0	4	0	0.5
CG2628	dnaJ	1187	1188	0	468	2790	3519	0.0743	-3.75049	0	667704	2	66	0.1	2.8
CG2629	grpE	656	657	0	0	54	61	0.0086	-6.86145	0.00707295	213854	0	6	0	0.5
CG263	dnaZX	2327	2328	0	0	5	32	0.0263	-5.24879	0.00232447	2700480	0	8	0	0.2
CG2630	cgp3100	1856	1857	0	0	364	1034	0.0007	-10.4804	7.5e-07	1702869	0	23	0	0.6
CG2631	cgp3101	1400	1401	156	0	4247	2377	0.0237	-5.39897	0	934486	1	68	0	2.4
CG2632	cgp3102	560	561	0	0	1374	971	0.0004	-11.2877	1e-08	148665	0	31	0	2.8
CG2633	cgp3103	1106	1107	156	0	3192	3839	0.0223	-5.48681	0	584511	1	52	0	2.3
CG2634	cgp3104	3335	3332	0	779	7340	6929	0.0547	-4.19232	0	5.32127e+06	1	140	0	2.1
CG2635	cgp3105	638	639	0	0	1673	2491	0.0002	-12.2877	0	193298	0	34	0	2.7
CG2636	cgp3106	1487	1484	0	0	3685	3214	0.0001	-13.2877	0	1049930	0	69	0	2.3
CG2637	adhA	1037	1038	0	0	3361	3668	0.0001	-13.2877	0	501873	0	73	0	3.5
CG2638	cgp3108	146	147	0	0	89	51	0.0071	-7.13797	0.0223833	10510.5	0	4	0	1.4
CG2639	mrr'	101	88	156	0	201	513	0.2196	-2.18705	0.0497689	3696.5	1	5	0.6	2.8
CG264	cgp0297	311	312	0	0	677	861	0.0006	-10.7027	2.81e-06	45552	0	21	0	3.4
CG2640	mrr	506	507	0	0	1390	1015	0.0004	-11.2877	1.85e-06	123201	0	21	0	2.1
CG2641	cgp3111	140	141	0	0	180	549	0.0014	-9.48036	0.00020718	9094.5	0	12	0	4.3
CG2642	cysZ	929	930	0	0	3361	2415	0.0002	-12.2877	0	406410	0	60	0	3.2
CG2643	cysY	725	726	0	0	392	362	0.0013	-9.58727	0.00025365	259182	0	12	0	0.8
CG2644	cysN	1301	1301	0	0	1234	604	0.0005	-10.9658	1e-08	826135	0	33	0	1.3
CG2645	cysD	914	915	0	0	507	287	0.0013	-9.58727	2.957e-05	411292	0	16	0	0.9
CG2646	cysH	785	782	0	0	459	306	0.0013	-9.58727	8.601e-05	300288	0	14	0	0.9
CG2647	cgp3117	248	241	0	0	238	153	0.0026	-8.58727	0.0069361	28317.5	0	6	0	1.2
CG2648	cysI	1685	1686	0	0	104	86	0.0052	-7.58727	0.00133505	1413711	0	9	0	0.3
CG2649	fpr2	1373	1374	0	0	5634	3457	0.0001	-13.2877	0	862872	0	118	0	4.3
CG265	recR	656	657	0	0	695	382	0.0009	-10.1178	0.00014636	211554	0	14	0	1.1
CG2650	cgp3120	1364	1365	0	0	3538	2778	0.0002	-12.2877	0	894075	0	55	0	2
CG2651	cgp3121	206	207	0	0	44	424	0.0021	-8.89539	0.012392	20907	0	5	0	1.2
CG2652	cgp3122	416	417	0	0	296	153	0.0022	-8.82828	0.00073978	84859.5	0	10	0	1.2
CG2653	cgp3124	368	369	0	0	413	303	0.0014	-9.48036	5.12e-06	64575	0	19	0	2.6
CG2654	tctA	1532	1533	0	0	4409	4260	0.0001	-13.2877	0	1103760	0	94	0	3.1
CG2655	cgp3126	566	565	156	0	424	536	0.1634	-2.61352	0.00109319	156508	1	12	0.1	1.1
CG2656	tctC	1004	1005	0	156	3927	4785	0.018	-5.79586	0	474874	1	64	0	3.2
CG2657	cgp3128	734	731	0	0	1311	871	0.0005	-10.9658	0	254388	0	35	0	2.4
CG2658	cgp3129	722	723	0	0	1185	1141	0.0004	-11.2877	1.4e-07	251966	0	26	0	1.8
CG2659	cgp3130	1211	1208	0	0	1926	2000	0.0003	-11.7027	0	701244	0	49	0	2
CG266	cobQ	752	752	0	0	153	447	0.0017	-9.20025	0.00708304	280496	0	6	0	0.4
CG2660	cgp3131	1325	1326	156	0	3715	2222	0.0264	-5.24332	0	832750	1	74	0	2.8
CG2661	cgp3132	1739	1740	0	0	0	160	0.0062	-7.33352	0.158794	1512930	0	1	0	0
CG2662	cgp3133	1028	1029	0	0	1718	3802	0.0002	-12.2877	0	501123	0	57	0	2.8
CG2663	cgp3134	644	635	0	156	1365	2969	0.0362	-4.78787	0	190507	1	38	0.1	3
CG2664	cgp3135	788	789	0	0	923	1339	0.0004	-11.2877	1e-08	298636	0	32	0	2
CG2665	cgp3136	818	819	312	0	1630	1142	0.1129	-3.14688	1.3e-07	323928	1	29	0.1	1.8
CG2666	iunH1	905	906	779	0	4058	2806	0.1136	-3.13797	0	387355	2	54	0.1	3
CG2667	cgp3138	977	978	0	0	4629	694	0.0002	-12.2877	0	458193	0	43	0	2.2
CG2668	cgp3139	194	195	0	0	99	0	0.01	-6.64386	0.0123748	18525	0	5	0	1.3
CG2669	tagA1	590	587	0	0	2732	1716	0.0002	-12.2877	3e-08	163773	0	30	0	2.6
CG267	cgp0300	1271	1272	0	0	1	4	0.1667	-2.58467	0.0126276	805812	0	5	0	0.2
CG2670	hmp	1160	1157	0	0	5072	3053	0.0001	-13.2877	0	621888	0	86	0	3.7
CG2671	cgp3142	605	606	0	0	1384	2467	0.0003	-11.7027	4e-08	175134	0	29	0	2.4
CG2672	cgp3143	626	613	0	0	3145	1541	0.0002	-12.2877	0	174398	0	44	0	3.6
CG2673	bglG	590	591	0	0	921	743	0.0006	-10.7027	1.91e-06	168435	0	21	0	1.8
CG2674	bglY	362	363	0	0	1091	1191	0.0004	-11.2877	9.8e-07	61891.5	0	23	0	3.2
CG2675	bglY'	242	243	0	0	942	220	0.0009	-10.1178	0.00040433	28188	0	11	0	2.3
CG2676	fepC	218	198	0	0	426	734	0.0009	-10.1178	0.00012635	18315	0	13	0	3.3
CG2677	alaT	1313	1314	0	0	2107	1422	0.0003	-11.7027	0	826506	0	56	0	2.1
CG2678	tnp2b	1514	1515	0	0	0	0	1	0		1.14761e+06	0	0	0	0
CG2679	cgp3153	1259	1260	0	0	2876	2720	0.0002	-12.2877	0	745290	0	77	0	3.1
CG268	cgp0302	1082	1083	0	0	2328	2482	0.0002	-12.2877	0	553954	0	61	0	2.8
CG2680	cgp3154	1319	1316	0	0	1992	4506	0.0002	-12.2877	0	817236	0	76	0	2.9
CG2681	dcd	569	570	0	0	604	910	0.0007	-10.4804	0	152760	0	34	0	3
CG2682	cgpt5059	73	74	0	0	0	0	1	0		2738	0	0	0	0
CG2683	cgp3156	773	774	0	0	1990	2311	0.0002	-12.2877	0	283671	0	41	0	2.6
CG2684	cgp3157	1691	1692	156	0	5398	6563	0.0131	-6.25429	0	1349400	1	102	0	3
CG2685	nagA2	1157	1158	0	0	2624	2024	0.0002	-12.2877	0	634005	0	64	0	2.8
CG2686	cgp3159	446	447	0	0	1419	1131	0.0004	-11.2877	1e-08	92976	0	32	0	3.6
CG2687	cgp3160	203	204	0	0	30	44	0.0133	-6.23243	0.0123879	20298	0	5	0	1.2
CG2688	cgp3161	3023	3024	0	0	1119	1176	0.0004	-11.2877	0	4477032	0	63	0	1
CG2689	cgp3163	1070	1071	0	0	568	319	0.0011	-9.82828	7.2e-07	561204	0	23	0	1.1
CG269	leuA	1850	1851	1558	0	9971	9687	0.0793	-3.65654	0	1563251	1	166	0	4.5
CG2690	cgp3164	818	819	0	0	733	724	0.0007	-10.4804	5e-08	323914	0	28	0	1.7
CG2691	cgp3165	1424	1425	0	0	485	683	0.0009	-10.1178	1e-08	992512	0	32	0	1.1
CG2692	cgp3166	1103	1074	0	0	250	434	0.0015	-9.38082	5e-08	561702	0	28	0	1.3
CG2693	cgp3167	590	591	0	0	1604	854	0.0004	-11.2877	1e-08	165480	0	31	0	2.6
CG2694	cgp3168	773	774	0	0	44	192	0.0042	-7.89539	0.00131773	296055	0	9	0	0.6
CG2695	pck	1832	1833	1402	0	5909	4519	0.1345	-2.89432	0	1559949	1	134	0	3.7
CG2696	cgp3170	1013	1014	0	0	2981	3893	0.0001	-13.2877	0	474045	0	82	0	4
CG2697	cgp3172	767	767	0	0	2930	2108	0.0002	-12.2877	0	278038	0	42	0	2.7
CG2698	cgp3173	686	687	0	156	2641	2040	0.0335	-4.8997	0	222256	1	42	0.1	3.1
CG2699	mmpL1	2318	2319	0	156	10733	6655	0.009	-6.79586	0	2487180	1	181	0	3.9
CG27	cgp0035	1238	1239	0	468	4280	1879	0.0761	-3.71596	0	715594	2	89	0.1	3.6
CG270	cgp0304	692	693	0	0	2590	3481	0.0002	-12.2877	0	216216	0	71	0	5.1
CG2700	cgp3175	1085	1086	0	0	1718	1908	0.0003	-11.7027	0	559833	0	55	0	2.5
CG2701	cgp3176	365	362	0	0	1170	131	0.0008	-10.2877	1.533e-05	62445	0	17	0	2.3
CG2702	pccB	1550	1551	2337	0	3	5	259.778	8.02113	0.0293827	1198926	1	6	0	0.2
CG2703	pks	4832	4833	312	468	47	1	15.9388	3.99447	0.158872	11671704	3	6	0	0.1
CG2704	fadD2	1862	1863	0	0	2	92	0.0105	-6.57347	0.00712467	1.7298e+06	0	6	0	0.2
CG2705	cgp3180	929	930	0	0	5774	6624	0.0001	-13.2877	0	398040	0	79	0	4.2
CG2706	cgp3181	500	501	0	0	1242	2230	0.0003	-11.7027	0	116232	0	37	0	3.7
CG2707	cgp3182	1973	1974	312	467	8004	8366	0.0476	-4.39289	0	1788601	2	170	0.1	4.3
CG2708	cgp3185	1373	1374	0	0	3847	3080	0.0001	-13.2877	0	884169	0	87	0	3.2
CG2709	cmt2	1025	1026	0	312	333	769	0.2838	-1.81705	1.4e-07	511988	1	29	0	1.4
CG271	lysC	1265	1266	0	0	0	1	0.5	-1	0.158846	800745	0	1	0	0
CG2710	cgp3187	2060	2061	8885	8104	221	164	44.0155	5.45994	0.00020619	2154270	50	21	1.2	0.5
CG2711	ubiA	998	999	0	0	1	0	0.5	-1	0.158898	498501	0	1	0	0.1
CG2712	cgp3190	506	492	0	467	15	0	29.25	4.87036	0.282844	120787	1	2	0.1	0.2
CG2713	glfT	1970	1971	0	0	1	119	0.0083	-6.91267	0.0416192	1939464	0	3	0	0.1
CG2714	cgp3192	1400	1369	0	312	8086	5983	0.0222	-5.4933	0	865248	2	111	0.1	4.1
CG2715	cgp3193	479	480	0	0	1790	2393	0.0002	-12.2877	0	105120	0	44	0	4.6
CG2716	cgp3194	593	594	0	0	873	546	0.0007	-10.4804	9.65e-06	171072	0	18	0	1.5
CG2717	cgp3195	1790	1791	312	156	9830	7470	0.0271	-5.20556	0	1491117	3	132	0.1	3.7
CG2718	glf	1205	1206	0	0	4	122	0.0079	-6.98393	0.0126251	724203	0	5	0	0.2
CG2719	psp5	2120	2121	0	0	9139	5815	0.0001	-13.2877	0	2087064	0	157	0	3.7
CG272	asd	1034	1035	0	0	4	0	0.2	-2.32193	0.158889	535095	0	1	0	0
CG2720	glpK	1529	1530	156	0	4321	3305	0.0206	-5.60121	0	1111570	1	79	0	2.6
CG2721	cgp3199	836	833	0	0	1014	2566	0.0003	-11.7027	2e-08	334450	0	31	0	1.9
CG2722	cgp3200	887	888	0	0	7	1	0.1111	-3.17007	0.0787081	393384	0	2	0	0.1
CG2723	serS	1268	1269	0	0	184	0	0.0054	-7.53282	0.0786905	803912	0	2	0	0.1
CG2724	farR	800	801	0	0	2502	2425	0.0002	-12.2877	0	301576	0	50	0	3.1
CG2725	cgp3203	1022	1019	0	156	2470	2750	0.0301	-5.05409	0	490160	1	58	0	2.8
CG2726	cgp3204	344	345	467	0	1046	706	0.267	-1.90509	2.65e-06	55729	1	23	0.1	3.3
CG2727	cgp3206	671	672	0	0	2232	977	0.0003	-11.7027	0	210000	0	47	0	3.5
CG2728	cgp3207	947	948	0	0	2019	1246	0.0003	-11.7027	0	425652	0	51	0	2.7
CG2729	cgp3208	1139	1140	0	0	2202	3938	0.0002	-12.2877	0	604200	0	81	0	3.6
CG273	cgp0308	1436	1437	0	0	1984	2378	0.0002	-12.2877	0	1000152	0	46	0	1.6
CG2730	cgp3209	731	728	0	0	3027	2571	0.0002	-12.2877	0	245700	0	54	0	3.7
CG2731	cgp3210	1244	1245	156	0	5049	4225	0.0169	-5.88683	0	724613	1	83	0	3.3
CG2732	cgp3211	872	873	0	0	1941	1588	0.0003	-11.7027	0	358803	0	53	0	3
CG2733	cgp3212	329	330	0	0	844	463	0.0008	-10.2877	1.504e-05	51645	0	18	0	2.7
CG2734	cgp3213	1286	1287	0	156	4842	3418	0.019	-5.71786	0	769653	1	92	0	3.6
CG2735	cgp3214	914	915	0	0	2973	2941	0.0002	-12.2877	0	396195	0	52	0	2.8
CG2736	glpQ1	761	745	156	0	1091	2119	0.0489	-4.35402	4e-08	266347	1	32	0.1	2.1
CG2737	gntP	1391	1392	0	0	5123	2849	0.0001	-13.2877	0	906888	0	93	0	3.3
CG2738	cgp3218	1859	1860	0	0	3801	4926	0.0001	-13.2877	0	1634010	0	105	0	2.8
CG2739	ldh	944	945	312	0	3981	5356	0.0335	-4.8997	0	410634	1	81	0.1	4.3
CG274	cgp0309	581	582	0	0	0	7	0.125	-3	0.159071	169071	0	1	0	0.1
CG2740	cgp3220	1778	1779	0	156	6143	4798	0.0143	-6.12784	0	1483720	1	114	0	3.2
CG2741	cgp3221	638	639	0	0	2317	3144	0.0002	-12.2877	0	188505	0	51	0	4
CG2742	cgp3223	545	546	0	0	1526	980	0.0004	-11.2877	0	140322	0	33	0	3
CG2743	lldR	668	669	156	0	1857	1203	0.0513	-4.2849	0	210081	1	42	0.1	3.1
CG2744	cgp3225	788	789	0	0	723	1770	0.0004	-11.2877	0	295480	0	40	0	2.5
CG2745	cgp3226	1301	1302	0	0	4669	3574	0.0001	-13.2877	0	793569	0	85	0	3.3
CG2746	lldD	1262	1263	0	0	3168	2381	0.0002	-12.2877	0	750854	0	74	0	2.9
CG2747	cgp3230	314	315	0	0	173	106	0.0036	-8.11779	0.00698671	48667.5	0	6	0	1
CG2748	cgp3231	170	34	0	0	0	0	1	0		578	0	0	0	0
CG2749	cgp4026	395	396	0	0	789	1037	0.0005	-10.9658	1.74e-06	74250	0	21	0	2.7
CG275	katA	1550	1551	156	0	4741	2948	0.0204	-5.61529	0	1124515	1	103	0	3.3
CG2750	cgp3232	1619	1620	623	0	5832	5794	0.0537	-4.21893	0	1222345	1	112	0	3.5
CG2751	cgp3233	548	549	0	0	1173	1037	0.0005	-10.9658	2.2e-07	143838	0	25	0	2.3
CG2752	cgp3234	404	405	0	0	1049	1181	0.0004	-11.2877	5.8e-07	77355	0	24	0	3
CG2753	msrA	653	654	0	0	1986	2117	0.0002	-12.2877	0	201105	0	39	0	3
CG2754	sod	602	603	0	0	437	355	0.0013	-9.58727	3.28e-06	175774	0	20	0	1.7
CG2755	cgp3238	116	117	0	0	3	129	0.0075	-7.05889	0.0414117	6669	0	3	0	1.3
CG2756	lysR2	926	927	0	0	1300	2206	0.0003	-11.7027	0	410661	0	42	0	2.3
CG2757	cgp3240	1238	1239	0	0	2256	2939	0.0002	-12.2877	0	734727	0	53	0	2.1
CG2758	cgp3242	1613	1614	0	0	3367	3255	0.0002	-12.2877	0	1251657	0	63	0	2
CG2759	cgp3243	1523	1524	156	0	5024	5214	0.0153	-6.03032	0	1.07598e+06	1	116	0	3.8
CG276	cgp0311	293	294	0	0	462	617	0.0009	-10.1178	4.81e-06	40425	0	19	0	3.2
CG2760	cgp3244	635	636	0	0	1911	1341	0.0003	-11.7027	0	189210	0	42	0	3.3
CG2761	cgp3245	1466	1467	0	0	4692	5505	0.0001	-13.2877	0	1001961	0	105	0	3.6
CG2762	cgp3246	458	459	156	156	741	1268	0.1557	-2.68316	7.6e-07	99389.5	2	28	0.2	3.1
CG2763	cgtR11	638	639	0	0	399	510	0.0011	-9.82828	1.93e-06	197451	0	21	0	1.6
CG2764	cgtS11	1334	1333	0	0	1352	1433	0.0004	-11.2877	0	859785	0	44	0	1.7
CG2765	cgp3249	551	552	0	0	1868	1511	0.0003	-11.7027	1.3e-07	145176	0	26	0	2.4
CG2766	cgp3250	152	153	0	0	84	297	0.0026	-8.58727	0.00681299	11245.5	0	7	0	2.3
CG2767	cgp3251	824	825	0	0	2575	1754	0.0002	-12.2877	0	321338	0	50	0	3
CG2768	cgp3252	1268	1195	156	0	2037	1534	0.044	-4.50635	0	690126	1	42	0	1.8
CG2769	mcbR	641	642	0	0	0	50	0.0196	-5.673	0.0415922	205119	0	3	0	0.2
CG277	lrp	455	456	0	0	1360	1470	0.0004	-11.2877	2e-08	97356	0	29	0	3.2
CG2770	cgp3254	263	264	0	0	180	230	0.0024	-8.70275	0.00071573	33528	0	10	0	1.9
CG2771	uspA3	905	906	156	0	1502	2203	0.0424	-4.55979	0	386431	1	54	0.1	3
CG2772	cgp3256	989	990	0	0	1241	1520	0.0004	-11.2877	0	471735	0	37	0	1.9
CG2773	cgp3257	140	141	0	0	68	291	0.0028	-8.48036	0.0122612	9588	0	5	0	1.8
CG2774	rluC2	1016	997	0	0	1697	1442	0.0003	-11.7027	0	475070	0	44	0	2.2
CG2775	cgpr5111	119	120	0	0	0	0	1	0		7200	0	0	0	0
CG2776	cgpr5135	3085	3086	0	0	0	0	1	0		4761698	0	0	0	0
CG2777	cgpr5123	1523	1524	0	0	0	0	1	0		1161288	0	0	0	0
CG2778	cgp3261	365	366	0	0	1155	1019	0.0005	-10.9658	2e-08	61671	0	30	0	4.1
CG2779	cgp3263	1418	1419	0	0	2701	1879	0.0002	-12.2877	0	947892	0	84	0	3
CG278	brnF	755	756	0	156	638	603	0.1264	-2.98393	3.7e-07	275952	1	28	0.1	1.9
CG2780	cgp3264	875	876	156	0	1380	3801	0.0303	-5.04454	0	359180	1	59	0.1	3.4
CG2781	tnp5c	1238	1239	0	0	2697	2465	0.0002	-12.2877	0	738444	0	47	0	1.9
CG2782	cgp3267	920	738	0	0	5251	5262	0.0001	-13.2877	0	246492	0	74	0	5
CG2783	cgp3268	251	252	0	0	765	509	0.0008	-10.2877	1.404e-05	29610	0	17	0	3.4
CG2784	cgp3269	254	255	0	0	576	935	0.0007	-10.4804	1.409e-05	30345	0	17	0	3.3
CG2785	cgp3270	206	206	0	0	1410	2159	0.0003	-11.7027	1.315e-05	19467	0	17	0	4.1
CG2786	cgp3271	773	774	0	0	3051	1503	0.0002	-12.2877	0	280188	0	51	0	3.3
CG2787	cgp3272	722	723	156	0	2765	2115	0.0322	-4.9568	0	239696	1	62	0.1	4.3
CG2788	cgp3273	296	297	0	156	2399	1902	0.0365	-4.77596	1.259e-05	41285	1	20	0.2	3.4
CG2789	cgp4011	173	174	0	0	692	697	0.0007	-10.4804	2.191e-05	13746	0	19	0	5.5
CG279	brnE	326	323	0	0	715	579	0.0008	-10.2877	0.00013714	50065	0	13	0	2
CG2790	cgp3274	218	137	0	0	805	594	0.0007	-10.4804	0.00117534	8768	0	10	0	3.6
CG2791	fdxA	323	324	0	0	2004	799	0.0004	-11.2877	9.4e-07	48924	0	22	0	3.4
CG2792	cgp3277	335	336	0	156	1121	1551	0.0587	-4.0905	7.64e-06	53093	1	22	0.1	3.3
CG2793	tnp20a	113	114	0	0	300	521	0.0012	-9.70275	0.00669894	6156	0	6	0	2.6
CG2794	cgp3279	128	129	0	0	214	380	0.0017	-9.20025	0.00116512	7740	0	9	0	3.5
CG2795	cgp3280	662	663	623	0	4179	3370	0.0826	-3.59771	0	198600	1	68	0.1	5.1
CG2796	cgp3281	2219	2220	0	0	11521	9469	0	#NUM!	0	2247750	0	202	0	4.5
CG2797	cgp3282	332	208	0	0	1897	2313	0.0002	-12.2877	1.3e-07	19032	0	28	0	6.7
CG2798	cgp3283	173	174	0	0	1377	956	0.0004	-11.2877	0.00012268	14007	0	13	0	3.7
[truncated: 938 more rows]

## Sheet: WT-CL31_1_results_genes
Loci	Name	length	TA sites	WT-CL31_1 F reads	WT-CL31_1 R reads	nophage_1 F reads	nophage_1 R reads	Ratio (Mut/WT)	log2	Mann Pvalue	Mann Statistic	WT-CL31_1 Unique Insertions	nophage_1 Unique Insertions	WT-CL31_1 Diversity	nophage_1 Diversity
CG1	dnaA	1574	1576	0	0	4	0	0.2	-2.32193	0.0786825	1240312	0	2	0	0.1
CG10	ssuR	1067	1068	0	0	2698	1837	0.0002	-12.2877	0	539340	0	61	0	2.9
CG100	ureF	680	680	0	0	1081	515	0.0006	-10.7027	5e-08	221680	0	29	0	2.1
CG1000	cgp1103	2498	2499	0	0	6095	6337	0.0001	-13.2877	0	2971311	0	124	0	2.5
CG1001	cgp1104	1280	1281	0	0	3568	2836	0.0002	-12.2877	0	770522	0	78	0	3
CG1002	lysI	1505	1506	0	0	3951	1856	0.0002	-12.2877	0	1086579	0	64	0	2.1
CG1003	cgp1106	212	213	0	0	514	482	0.001	-9.96578	0.00022577	21406.5	0	12	0	2.8
CG1004	cgp1107	587	561	0	173	1130	841	0.0882	-3.50308	2.93e-06	151197	1	23	0.1	2
CG1005	cgp1108	371	372	0	0	828	1031	0.0005	-10.9658	2.673e-05	66216	0	17	0	2.3
CG1006	cgp1109	380	381	173	0	1507	1417	0.0595	-4.07097	0	65736	1	37	0.1	4.9
CG1007	cgp1110	764	765	0	0	1975	2631	0.0002	-12.2877	0	275400	0	45	0	2.9
CG1008	eno	1277	1278	0	0	0	77	0.0128	-6.28771	0.0416121	814725	0	3	0	0.1
CG1009	cgp1112	542	543	0	0	806	626	0.0007	-10.4804	8.372e-05	143624	0	14	0	1.3
CG101	ureG	617	618	0	0	1567	1492	0.0003	-11.7027	0	178293	0	42	0	3.4
CG1010	cgp1113	554	555	0	0	0	73	0.0135	-6.2109	0.159092	153735	0	1	0	0.1
CG1011	ppx2	965	965	0	0	1298	1662	0.0003	-11.7027	0	443418	0	46	0	2.4
CG1012	cgpt5024	76	77	0	0	0	0	1	0		2964.5	0	0	0	0
CG1013	tdcB	932	933	0	0	1397	2209	0.0003	-11.7027	0	414718	0	46	0	2.5
CG1014	cgp1117	197	198	0	0	299	1	0.0033	-8.24332	0.00688899	19008	0	6	0	1.5
CG1015	cgp1118	332	333	0	173	1625	1355	0.0584	-4.09789	2e-08	50291	1	32	0.2	4.8
CG1016	cgp1119	191	192	0	0	218	11	0.0043	-7.86145	0.00688136	17856	0	6	0	1.6
CG1017	ripA	995	996	0	1561	2823	2235	0.3088	-1.69526	0	477104	1	39	0.1	2
CG1018	cgp1121	818	819	520	0	1181	0	0.4408	-1.1818	1.55e-05	327610	1	20	0.1	1.2
CG1019	cgp1122	452	453	0	0	509	286	0.0013	-9.58727	0.00014229	99660	0	13	0	1.4
CG102	ureD	851	852	0	0	3152	2841	0.0002	-12.2877	0	340374	0	54	0	3.2
CG1020	greA	524	525	0	0	53	159	0.0047	-7.73312	0.0125623	136500	0	5	0	0.5
CG1021	cgp1124	98	99	0	0	50	124	0.0057	-7.45482	0.0413714	4752	0	3	0	1.5
CG1022	cgp1125	338	302	0	0	0	29	0.0333	-4.90833	0.159458	45451	0	1	0	0.2
CG1023	mca	884	885	0	173	3483	3127	0.0263	-5.24879	0	364196	1	65	0.1	3.7
CG1024	cgp1128	320	321	0	0	183	1	0.0054	-7.53282	0.022582	50878.5	0	4	0	0.6
CG1025	aorR	77	78	0	0	0	0	1	0		3042	0	0	0	0
CG1026	aroF	1100	1101	0	0	2991	2448	0.0002	-12.2877	0	571970	0	64	0	2.9
CG1027	uppS1	770	771	173	0	1680	1182	0.0608	-4.03978	0	283741	1	37	0.1	2.4
CG1028	cgp1131	521	522	0	0	2677	2028	0.0002	-12.2877	0	126585	0	37	0	3.5
CG1029	coaA	971	972	0	0	0	15	0.0625	-4	0.078703	471420	0	2	0	0.1
CG103	cgp0120	779	776	1041	0	2654	1816	0.2331	-2.10098	0	285219	2	43	0.1	2.8
CG1030	glyA	1304	1305	0	0	0	1	0.5	-1	0.158841	850860	0	1	0	0
CG1031	pab	1862	1859	0	173	3139	3129	0.0278	-5.16877	0	1660111	1	74	0	2
CG1032	cgp1135	725	726	0	0	1828	3033	0.0002	-12.2877	0	248292	0	43	0	3
CG1033	cgp1136	389	390	0	0	283	663	0.0011	-9.82828	1.73e-06	71955	0	21	0	2.7
CG1034	cgp1137	674	675	0	0	59	238	0.0034	-8.20025	0.00025274	223762	0	12	0	0.9
CG1035	cgp1138	539	536	0	0	161	596	0.0013	-9.58727	2.816e-05	139360	0	16	0	1.5
CG1036	cgp1139	881	882	0	0	1591	1195	0.0004	-11.2877	0	370881	0	42	0	2.4
CG1037	cgp1140	653	650	0	0	1632	2335	0.0003	-11.7027	0	197275	0	43	0	3.3
CG1038	cgp1141	758	748	0	0	2814	2309	0.0002	-12.2877	0	257312	0	60	0	4
CG1039	cgp1142	1310	1311	0	0	4265	3676	0.0001	-13.2877	0	804298	0	86	0	3.3
CG104	cgp0121	1154	1155	0	173	1523	2281	0.0457	-4.45166	0	640461	1	47	0	2
CG1040	cgp1143	653	654	0	0	453	1260	0.0006	-10.7027	2.3e-07	205683	0	25	0	1.9
CG1041	cgp1144	1244	1245	520	0	2375	3170	0.0939	-3.41273	0	743304	2	55	0.1	2.2
CG1042	fum	1409	1410	0	0	371	195	0.0018	-9.11779	2.13e-06	979245	0	21	0	0.7
CG1043	ssuI	491	492	0	520	821	1099	0.2712	-1.88257	7e-08	113913	1	30	0.1	3
CG1044	cgp1148	263	264	0	0	189	546	0.0014	-9.48036	0.00125716	33660	0	9	0	1.7
CG1045	cgp1149	425	426	0	0	624	1516	0.0005	-10.9658	3.4e-07	85626	0	25	0	2.9
CG1046	cgp1150	566	567	0	173	2411	2871	0.0329	-4.92577	0	146022	1	53	0.1	4.7
CG1047	seuA	1463	1464	0	0	3869	3189	0.0001	-13.2877	0	1010892	0	87	0	3
CG1048	seuB	1082	1075	0	0	1167	2783	0.0003	-11.7027	0	556312	0	40	0	1.9
CG1049	seuC	1199	1200	0	0	1984	2667	0.0002	-12.2877	0	687600	0	55	0	2.3
CG105	cgp0122	2777	2778	0	173	6775	7006	0.0126	-6.31043	0	3.64757e+06	1	155	0	2.8
CG1050	ssuD2	1178	1179	0	0	3166	3359	0.0002	-12.2877	0	654934	0	68	0	2.9
CG1051	fbp	1007	1008	0	0	2734	3490	0.0002	-12.2877	0	475272	0	65	0	3.2
CG1052	cgp1158	572	573	173	0	1376	510	0.0922	-3.43909	1.73e-06	157584	1	24	0.1	2.1
CG1053	cgp1159	1904	1905	0	0	3839	4820	0.0001	-13.2877	0	1712595	0	112	0	2.9
CG1054	cgp1160	227	228	0	0	1021	343	0.0007	-10.4804	1.361e-05	24054	0	17	0	3.7
CG1055	xseB	245	246	0	0	232	259	0.002	-8.96578	0.00125056	29151	0	9	0	1.8
CG1056	xseA	1253	1254	0	0	4058	4226	0.0001	-13.2877	0	733590	0	86	0	3.4
CG1057	ispH	977	978	0	0	0	0	1	0		478242	0	0	0	0
CG1058	cgp1165	830	831	0	0	1987	1529	0.0003	-11.7027	2e-08	332816	0	30	0	1.8
CG1059	cgp1166	1481	1482	0	173	3356	3951	0.0238	-5.39289	0	1036687	1	84	0	2.8
CG106	htpG	1826	1827	0	0	4470	6777	0.0001	-13.2877	0	1.57213e+06	0	109	0	3
CG1060	cgp1167	182	183	0	173	86	1037	0.1548	-2.69152	0.00010717	15378	1	16	0.3	4.4
CG1061	metP	1691	1692	0	0	5789	4080	0.0001	-13.2877	0	1333296	0	116	0	3.4
CG1062	cmt5	1235	1236	0	0	3347	5249	0.0001	-13.2877	0	705138	0	97	0	3.9
CG1063	cgp1171	1085	1086	0	0	131	257	0.0026	-8.58727	2.99e-05	581010	0	16	0	0.7
CG1064	cgp1172	281	282	0	0	438	461	0.0011	-9.82828	0.00041114	38211	0	11	0	2
CG1065	cgp1173	299	300	520	0	292	827	0.4652	-1.10408	0.00107209	43356	1	13	0.2	2.2
CG1066	arcB	833	830	0	0	1360	1250	0.0004	-11.2877	0	329925	0	35	0	2.1
CG1067	cgp1175	503	504	0	0	803	1690	0.0004	-11.2877	9.42e-06	122472	0	18	0	1.8
CG1068	cgp1176	557	558	0	0	917	898	0.0006	-10.7027	1e-08	147312	0	31	0	2.8
CG1069	tnp9a	1208	1209	173	520	4167	2751	0.1003	-3.31761	0	686800	3	76	0.1	3.1
CG107	amn	1409	1410	0	0	2835	2757	0.0002	-12.2877	0	940470	0	77	0	2.7
CG1070	cgp1179	3056	3057	0	0	6068	6485	0.0001	-13.2877	0	4475448	0	133	0	2.2
CG1071	cgp1180	1469	1466	0	0	3641	3360	0.0001	-13.2877	0	1024001	0	69	0	2.4
CG1072	cgp1182	221	222	0	0	27	24	0.0192	-5.70275	0.0788837	24420	0	2	0	0.5
CG1073	cgp1183	335	336	0	0	625	755	0.0007	-10.4804	1.51e-05	53592	0	17	0	2.5
CG1074	tnp10c	293	290	0	173	815	475	0.1348	-2.89111	0.00011762	39881	1	17	0.2	2.9
CG1075	tnp10b	377	378	0	0	661	440	0.0009	-10.1178	4.645e-05	68607	0	15	0	2
CG1076	Name=tnp10a'	146	147	0	0	169	116	0.0035	-8.15843	0.0414569	10584	0	3	0	1
CG1077	cgp1189	188	189	0	0	0	39	0.025	-5.32193	0.159939	17766	0	1	0	0.3
CG1078	cgp1190	368	369	0	0	102	165	0.0037	-8.07826	0.0125153	67158	0	5	0	0.7
CG1079	cgp1191	500	501	0	173	812	1050	0.0934	-3.42043	8.36e-06	120495	1	23	0.1	2.3
CG108	cgp0126	581	582	0	0	403	974	0.0007	-10.4804	6.5e-07	162669	0	23	0	2
CG1080	cgp1192	803	804	0	0	2112	1690	0.0003	-11.7027	0	306726	0	41	0	2.5
CG1081	cgp1193	323	324	0	0	846	742	0.0006	-10.7027	1.8e-07	48438	0	25	0	3.9
CG1082	cgp1194	656	657	0	0	1138	1283	0.0004	-11.2877	4e-08	206626	0	28	0	2.1
CG1083	cgp1195	1697	1698	346	0	4349	4183	0.0407	-4.61883	0	1372040	2	88	0.1	2.6
CG1084	cgp1197	599	600	0	0	675	1099	0.0006	-10.7027	4e-08	171600	0	28	0	2.3
CG1085	cgp1198	500	497	520	0	944	1005	0.2672	-1.90401	9.405e-05	119294	2	20	0.2	2
CG1086	cgp1199	335	336	0	0	328	233	0.0018	-9.11779	0.0007297	54768	0	10	0	1.5
CG1087	cgp1200	122	123	0	0	176	82	0.0039	-8.00231	0.0414225	7380	0	3	0	1.2
CG1088	cgp1201	155	149	0	173	18	595	0.2834	-1.81909	0.00536583	10508	1	9	0.3	3
CG1089	cgp1202	1958	1959	0	0	4480	3432	0.0001	-13.2877	0	1.8444e+06	0	77	0	2
CG109	cgp0127	554	555	0	0	1852	757	0.0004	-11.2877	0	144022	0	37	0	3.3
CG1090	cgp1203	1364	1365	347	0	3070	2315	0.0646	-3.95232	0	887282	1	66	0	2.4
CG1091	cgp1204	689	690	0	0	1383	1281	0.0004	-11.2877	8e-08	228735	0	27	0	2
CG1092	cgp1205	707	704	0	0	724	677	0.0007	-10.4804	2.3e-07	239008	0	26	0	1.8
CG1093	cgp1206	764	765	0	0	1421	2346	0.0003	-11.7027	0	277312	0	41	0	2.7
CG1094	cgp1207	1643	1644	0	0	2298	2776	0.0002	-12.2877	0	1295472	0	68	0	2.1
CG1095	cgp1208	398	385	0	0	1505	1896	0.0003	-11.7027	3.3e-07	69492.5	0	25	0	3.2
CG1096	cgp1209	344	345	0	0	863	572	0.0007	-10.4804	7.955e-05	57097.5	0	15	0	2.2
CG1097	cgp1210	92	93	0	0	301	557	0.0012	-9.70275	0.0221708	4138.5	0	4	0	2.2
CG1098	cgp1211	476	477	0	0	664	696	0.0007	-10.4804	1.609e-05	109710	0	17	0	1.8
CG1099	cgp1212	1220	1221	0	0	2819	3866	0.0001	-13.2877	0	702686	0	70	0	2.9
CG11	cgp0013	263	264	0	0	689	672	0.0007	-10.4804	1.51e-06	32076	0	21	0	4
CG110	cgp0128	551	552	0	0	1202	1641	0.0004	-11.2877	1.88e-06	146556	0	21	0	1.9
CG1100	tnp1a	1310	1311	0	0	0	0	1	0		859360	0	0	0	0
CG1101	cgp1214	1076	1076	0	0	1708	2649	0.0002	-12.2877	0	544994	0	65	0	3
CG1102	nadC	839	840	0	0	1825	1868	0.0003	-11.7027	0	335580	0	41	0	2.4
CG1103	nadA	1286	1287	0	0	3532	3056	0.0002	-12.2877	0	778635	0	79	0	3.1
CG1104	cgp1218	644	645	0	0	2371	1186	0.0003	-11.7027	4e-08	198982	0	28	0	2.2
CG1105	cgp1219	923	924	0	0	3174	2453	0.0002	-12.2877	0	396396	0	69	0	3.7
CG1106	cgp1220	602	603	0	0	347	656	0.001	-9.96578	3.28e-06	175774	0	20	0	1.7
CG1107	cgp1221	344	345	0	0	748	710	0.0007	-10.4804	2.9e-06	56062.5	0	21	0	3
CG1108	lplA	1058	1059	0	0	3968	4112	0.0001	-13.2877	0	526852	0	65	0	3.1
CG1109	cgp1224	413	414	0	0	1320	635	0.0005	-10.9658	3.04e-06	81558	0	20	0	2.4
CG111	putA	3458	3459	0	347	7367	8387	0.0221	-5.49981	0	5665927	1	188	0	2.7
CG1110	pcaK	1295	1296	0	0	3652	3319	0.0001	-13.2877	0	784080	0	86	0	3.3
CG1111	cgp1226	1187	1188	0	347	2640	3100	0.0606	-4.04454	0	665907	1	70	0	2.9
CG1112	cgp1227	605	606	0	0	1274	798	0.0005	-10.9658	3e-08	174831	0	29	0	2.4
CG1113	cgp1228	1340	1337	0	347	1815	2290	0.0848	-3.55979	0	857713	1	55	0	2.1
CG1114	cgp1229	755	752	0	0	1741	1494	0.0003	-11.7027	0	269592	0	37	0	2.5
CG1115	cgp1230	533	534	0	0	1053	1172	0.0004	-11.2877	6.3e-07	136437	0	23	0	2.2
CG1116	chaA	1052	1053	0	0	2620	1623	0.0002	-12.2877	0	524920	0	59	0	2.8
CG1117	cgp1232	704	705	0	0	854	1913	0.0004	-11.2877	1e-08	237232	0	32	0	2.3
CG1118	cgp1233	725	692	0	0	1530	1655	0.0003	-11.7027	1e-08	228360	0	32	0	2.3
CG1119	cgp1234	2342	2343	2775	0	3801	6461	0.2705	-1.8863	0	2614844	1	112	0	2.4
CG112	cgp0131	935	936	173	0	2651	3596	0.0278	-5.16877	0	407178	1	67	0.1	3.6
CG1120	tpx	497	498	0	0	1381	870	0.0004	-11.2877	1.2e-07	117528	0	26	0	2.6
CG1121	cgp1237	1778	1775	173	694	4526	4274	0.0986	-3.34227	0	1.49817e+06	2	92	0.1	2.6
CG1122	cgp1238	956	957	520	0	3285	2486	0.0903	-3.46913	0	427832	2	66	0.1	3.4
CG1123	cgp1239	902	903	173	0	4369	2646	0.0248	-5.33352	0	386044	1	49	0.1	2.7
CG1124	cgp1240	368	369	0	0	926	66	0.001	-9.96578	1.7e-06	64206	0	21	0	2.8
CG1125	cgp4004	260	247	0	0	86	307	0.0025	-8.64386	0.00694129	29763.5	0	6	0	1.2
CG1126	cgp1241	263	125	0	0	732	31	0.0013	-9.58727	0.00673809	7437.5	0	7	0	2.8
CG1127	cgp1242	389	390	0	0	603	921	0.0007	-10.4804	1.73e-06	71955	0	21	0	2.7
CG1128	cgp1243	836	837	0	0	1548	2332	0.0003	-11.7027	0	327267	0	56	0	3.3
CG1129	cgp1244	347	348	0	0	495	202	0.0014	-9.48036	0.00041929	58638	0	12	0	1.7
CG113	cgp0133	1523	1524	0	0	2768	3101	0.0002	-12.2877	0	1113282	0	64	0	2.1
CG1130	cgp1245	1202	1203	0	0	4519	2801	0.0001	-13.2877	0	688116	0	59	0	2.5
CG1131	cgp1246	539	540	703182	1115906	813	1091	954.902	9.89921	0.00158683	152706	54	29	5	2.7
CG1132	cgp1247	716	717	53411	0	932	1781	19.6802	4.29867	1.88e-05	247496	8	36	0.6	2.5
CG1133	cgp1248	1922	1923	173	0	241	0	0.719	-0.475936	0.0097926	1842238	1	8	0	0.2
CG1134	cgp1249	1502	1489	0	0	545	132	0.0015	-9.38082	8.854e-05	1.09814e+06	0	14	0	0.5
CG1135	mshB	872	873	0	0	3378	2098	0.0002	-12.2877	0	349200	0	75	0	4.3
CG1136	cgp1251	413	414	0	0	1696	1512	0.0003	-11.7027	5.9e-07	80937	0	23	0	2.8
CG1137	fdxC	317	318	0	0	192	195	0.0026	-8.58727	0.00223481	49290	0	8	0	1.3
CG1138	dapC	1103	1104	0	0	1	3	0.2	-2.32193	0.0227012	607200	0	4	0	0.2
CG1139	cgp1254	590	591	0	0	170	309	0.0021	-8.89539	0.00400271	172572	0	7	0	0.6
CG114	cgp0134	1388	1389	0	0	2370	1555	0.0003	-11.7027	0	924380	0	58	0	2.1
CG1140	cgp1255	1187	1188	0	0	867	1468	0.0004	-11.2877	1.033e-05	694980	0	18	0	0.8
CG1141	dapD	893	890	0	0	1450	2390	0.0003	-11.7027	0	372020	0	54	0	3
CG1142	cgp1257	1391	1392	173	0	3417	2487	0.0295	-5.08314	0	925702	1	63	0	2.3
CG1143	dapD2	899	900	0	0	5097	3036	0.0001	-13.2877	0	365850	0	89	0	4.9
CG1144	dapE	1109	1110	0	0	4090	2223	0.0002	-12.2877	0	583305	0	61	0	2.7
CG1145	cgp1261	770	771	0	0	3696	2100	0.0002	-12.2877	0	278716	0	48	0	3.1
CG1146	folP2	833	834	0	0	1863	3645	0.0002	-12.2877	0	325677	0	53	0	3.2
CG1147	cgp1263	716	717	0	0	1775	1223	0.0003	-11.7027	0	245214	0	33	0	2.3
CG1148	cgp1264	308	309	0	0	1	218	0.0045	-7.79586	0.003937	46659	0	7	0	1.1
CG1149	cgp1265	167	168	0	0	143	188	0.003	-8.38082	0.0224291	13776	0	4	0	1.2
CG115	cgp0135	368	369	520	0	709	708	0.3674	-1.44458	0.00036495	65689	1	15	0.1	2
CG1150	rlmA	866	867	0	173	1478	1320	0.0622	-4.00694	0	355925	1	48	0.1	2.8
CG1151	cgp1267	1496	1497	0	0	2750	5071	0.0001	-13.2877	0	1052391	0	91	0	3
CG1152	glgA	1172	1173	0	0	2878	2626	0.0002	-12.2877	0	649256	0	67	0	2.9
CG1153	glgC	1217	1218	0	0	6159	3412	0.0001	-13.2877	0	684516	0	98	0	4
CG1154	cgp1270	641	642	0	520	256	547	0.648	-0.625934	0.00078428	201923	2	15	0.2	1.2
CG1155	sigE	641	642	0	0	105	123	0.0044	-7.82828	0.0070711	204156	0	6	0	0.5
CG1156	cgp1272	494	495	0	0	287	187	0.0021	-8.89539	0.0125556	121275	0	6	0	0.6
CG1157	cgp1273	470	471	0	0	160	140	0.0033	-8.24332	0.0415776	110214	0	3	0	0.3
CG1158	mrp	1127	1128	0	0	189	85	0.0036	-8.11779	0.0126218	633372	0	5	0	0.2
CG1159	cgp1275	581	582	0	0	911	1854	0.0004	-11.2877	1e-08	160341	0	31	0	2.7
CG116	cgp0136	317	318	0	0	594	570	0.0009	-10.1178	0.00013686	48495	0	14	0	2.2
CG1160	mgtE1	1292	1285	0	0	1665	1821	0.0003	-11.7027	0	796058	0	48	0	1.9
CG1161	cgp1277	497	498	173	0	1431	1086	0.0691	-3.85517	4e-08	116542	1	32	0.1	3.2
CG1162	cgp1278	668	669	0	0	1113	1014	0.0005	-10.9658	3.9e-07	215752	0	24	0	1.8
CG1163	cgp1279	533	525	0	0	1345	588	0.0005	-10.9658	4e-08	130462	0	29	0	2.8
CG1164	odhA	3665	3666	0	0	10	151	0.0062	-7.33352	9.023e-05	6694116	0	14	0	0.2
CG1165	cgp1281	3743	3744	0	520	12815	11017	0.0219	-5.51293	0	6580192	1	236	0	3.2
CG1166	cgp1282	719	720	0	0	1319	1597	0.0003	-11.7027	0	245520	0	38	0	2.6
CG1167	aroE2	806	807	0	0	3414	3023	0.0002	-12.2877	0	293344	0	82	0	5.1
CG1168	cgp1284	1679	1680	0	0	6490	7828	0.0001	-13.2877	0	1299480	0	136	0	4
CG1169	cgp1285	653	654	0	0	123	1375	0.0007	-10.4804	6.6e-07	206337	0	23	0	1.8
CG117	cgp0138	1955	1956	0	0	5063	5094	0.0001	-13.2877	0	1805388	0	111	0	2.8
CG1170	cgp1286	803	804	0	0	930	728	0.0006	-10.7027	3e-08	311550	0	29	0	1.8
CG1171	cgp1287	473	474	173	0	1300	564	0.0933	-3.42198	0	104296	1	36	0.1	3.8
CG1172	cgp1288	1217	1218	173	0	2695	2017	0.0369	-4.76024	0	710720	1	53	0	2.2
CG1173	cgp1289	1349	1342	0	0	2796	3892	0.0001	-13.2877	0	853512	0	71	0	2.6
CG1174	metE	2237	2238	0	0	3006	3216	0.0002	-12.2877	0	2402493	0	91	0	2
CG1175	cgp1291	347	348	0	0	1130	1053	0.0005	-10.9658	5.04e-06	57246	0	19	0	2.7
CG1176	cgp1292	1412	1413	0	0	4257	1842	0.0002	-12.2877	0	946004	0	75	0	2.7
CG1177	cgp1293	326	327	0	0	485	285	0.0013	-9.58727	0.00127465	51993	0	9	0	1.4
CG1178	cgp1294	896	897	0	520	1656	1833	0.1493	-2.74371	5e-08	388864	1	31	0.1	1.7
CG1179	cgp1295	794	795	0	173	2738	1824	0.0381	-4.71407	0	296947	1	49	0.1	3.1
CG118	cgp0139	782	783	0	0	1101	1019	0.0005	-10.9658	0	292842	0	35	0	2.2
CG1180	cgp1296	1649	1650	0	173	2310	2405	0.0369	-4.76024	0	1.31507e+06	1	58	0	1.8
CG1181	cydC	1556	1553	0	0	2721	3515	0.0002	-12.2877	0	1.1531e+06	0	68	0	2.2
CG1182	cydD	1535	1536	347	0	1590	2341	0.0885	-3.49818	0	1.13667e+06	1	58	0	1.9
CG1183	cydB	1001	1002	0	0	1681	1275	0.0003	-11.7027	0	483966	0	36	0	1.8
CG1184	cydA	1541	1542	0	0	3506	3904	0.0001	-13.2877	0	1126431	0	84	0	2.7
CG1185	cgp1302	2915	2916	1040	0	7111	4876	0.0868	-3.52616	0	4.05039e+06	1	140	0	2.4
CG1186	cgp1303	395	395	0	0	979	996	0.0005	-10.9658	5.21e-06	74260	0	20	0	2.5
CG1187	cgp1304	767	768	0	0	1236	461	0.0006	-10.7027	4e-07	285696	0	24	0	1.6
CG1188	cgp1305	1406	1407	0	173	4173	6759	0.0159	-5.97483	0	914582	1	112	0	4
CG1189	cgp1307	2198	2199	0	0	260	0	0.0038	-8.03978	0.00077442	2.40681e+06	0	10	0	0.2
CG119	cgp0141	392	393	0	0	811	172	0.001	-9.96578	5.2e-06	73491	0	19	0	2.4
CG1190	cgp1308	689	690	0	0	983	1063	0.0005	-10.9658	0	226665	0	33	0	2.4
CG1191	cgp1309	1592	1593	0	0	1156	2539	0.0003	-11.7027	0	1.22103e+06	0	62	0	1.9
CG1192	tfdF	1070	1071	0	0	1898	2133	0.0002	-12.2877	0	546210	0	51	0	2.4
CG1193	cgp1311	887	888	0	0	1793	2836	0.0002	-12.2877	0	369408	0	56	0	3.2
CG1194	cgp1312	473	474	0	0	938	1439	0.0004	-11.2877	1e-08	105228	0	30	0	3.2
CG1195	cgp1313	542	543	0	0	2893	1654	0.0002	-12.2877	0	138736	0	33	0	3
CG1196	putP	1574	1575	173	0	3678	2508	0.0281	-5.15329	0	1191508	1	63	0	2
CG1197	cgp1316	3104	3097	0	173	5098	3872	0.0194	-5.6878	0	4623864	1	112	0	1.8
CG1198	cgp1317	854	855	0	0	1762	1477	0.0003	-11.7027	0	347558	0	43	0	2.5
CG1199	cgp1318	1175	1176	0	173	3226	2482	0.0305	-5.03505	0	653876	1	65	0	2.8
CG12	cgp0014	248	245	0	0	644	647	0.0008	-10.2877	1.392e-05	27930	0	17	0	3.5
CG120	sixA	512	509	0	0	492	1257	0.0006	-10.7027	3.6e-07	123432	0	24	0	2.4
CG1200	cgp1319	2630	2631	0	0	7973	6838	0.0001	-13.2877	0	3.24797e+06	0	166	0	3.2
CG1201	lipP	776	777	0	0	1403	1904	0.0003	-11.7027	0	285936	0	41	0	2.6
CG1202	cgp1321	380	381	0	0	1932	933	0.0003	-11.7027	4e-08	67246.5	0	29	0	3.8
CG1203	cgp1322	539	540	0	0	526	1144	0.0006	-10.7027	3.7e-07	139320	0	24	0	2.2
CG1204	rosR	488	489	347	0	1920	1359	0.1061	-3.2365	9.8e-07	113704	1	26	0.1	2.7
CG1205	cgp1325	215	216	0	0	452	111	0.0018	-9.11779	0.00070145	22248	0	10	0	2.3
CG1206	cgp1326	422	423	0	0	1603	1068	0.0004	-11.2877	1e-08	83119.5	0	30	0	3.5
CG1207	cgp1327	752	753	0	0	830	671	0.0007	-10.4804	1.701e-05	277104	0	17	0	1.1
CG1208	cgp1328	236	237	0	0	393	481	0.0011	-9.82828	0.00124688	27018	0	9	0	1.9
CG1209	ctpC	1877	1878	0	0	2737	2383	0.0002	-12.2877	0	1696773	0	71	0	1.9
CG121	mtlD	1511	1512	0	1040	4326	2987	0.1423	-2.81299	0	1087202	2	77	0.1	2.5
CG1210	cgp1330	632	633	0	1387	602	841	0.9612	-0.0570914	6.1e-07	192445	1	26	0.1	2.1
CG1211	cgpt5025	72	73	0	0	0	0	1	0		2664.5	0	0	0	0
CG1212	cgp1332	1583	1584	0	0	5873	5404	0.0001	-13.2877	0	1161072	0	120	0	3.8
CG1213	argS	1652	1653	0	0	0	1	0.5	-1	0.158802	1365378	0	1	0	0
CG1214	lysA	1337	1338	0	0	602	493	0.0009	-10.1178	2e-08	875052	0	31	0	1.2
CG1215	cgp1335	605	602	694	0	648	1362	0.3456	-1.53282	3.5e-07	173390	1	29	0.1	2.4
CG1216	cgp1336	122	123	0	0	222	451	0.0015	-9.38082	0.00064437	6949.5	0	10	0	4.1
CG1217	hom	1337	1338	0	0	1815	1753	0.0003	-11.7027	0	851637	0	65	0	2.4
CG1218	thrB	929	930	0	0	2348	1361	0.0003	-11.7027	0	412455	0	45	0	2.4
CG1219	arnR	692	693	0	0	744	529	0.0008	-10.2877	1.3e-07	231116	0	27	0	1.9
CG122	rbtT	1337	1338	0	347	4639	3803	0.0412	-4.60121	0	831611	1	98	0	3.7
CG1220	narI	779	780	0	0	1701	2572	0.0002	-12.2877	0	287040	0	44	0	2.8
CG1221	narJ	686	687	0	0	3738	1275	0.0002	-12.2877	0	221901	0	41	0	3
CG1222	narH	1595	1595	0	173	2919	2682	0.0311	-5.00694	0	1215415	1	76	0	2.4
CG1223	narG	3746	3747	1214	173	10521	12825	0.0595	-4.07097	0	6.59501e+06	3	231	0	3.1
CG1224	narK	1337	1338	0	0	2326	3539	0.0002	-12.2877	0	842271	0	80	0	3
CG1225	mog	488	489	0	0	1457	1118	0.0004	-11.2877	1.06e-06	114182	0	22	0	2.2
CG1226	cgp1347	1868	1869	0	0	3763	4580	0.0001	-13.2877	0	1644720	0	109	0	2.9
CG1227	cgp1348	1010	1011	0	0	2099	2091	0.0002	-12.2877	0	484269	0	53	0	2.6
CG1228	cgp1349	1403	1404	0	0	3609	4103	0.0001	-13.2877	0	928044	0	85	0	3
CG1229	mob	563	564	0	0	1787	2351	0.0002	-12.2877	0	147486	0	41	0	3.6
CG123	sucR	848	849	0	0	1899	1643	0.0003	-11.7027	0	344270	0	38	0	2.2
CG1230	cgp1351	1211	1212	0	0	3231	2455	0.0002	-12.2877	0	696900	0	62	0	2.6
CG1231	moaA	1208	1209	0	0	2778	3200	0.0002	-12.2877	0	693966	0	61	0	2.5
CG1232	fadD4	1727	1717	1908	0	1305	1257	0.7448	-0.425075	0	1.42774e+06	2	56	0.1	1.6
CG1233	rho	2288	2289	0	0	177	54	0.0043	-7.86145	0.0126481	2614038	0	5	0	0.1
CG1234	prfA	1076	1076	0	0	0	0	1	0		578888	0	0	0	0
CG1235	cgp1356	839	840	0	0	0	0	1	0		352800	0	0	0	0
CG1236	cgp1358	650	651	0	0	0	1	0.5	-1	0.159027	211575	0	1	0	0.1
CG1237	cgp1359	1148	1149	0	0	1	4	0.1667	-2.58467	0.0416099	658377	0	3	0	0.1
CG1238	cgp1360	449	450	0	0	19	431	0.0022	-8.82828	0.0125438	100125	0	5	0	0.6
CG1239	cgp1361	242	243	0	0	0	2	0.3333	-1.58511	0.078863	29281.5	0	2	0	0.4
CG124	xylB	1382	1383	0	0	2431	3185	0.0002	-12.2877	0	910014	0	68	0	2.5
CG1240	atpB	935	936	0	0	0	2	0.3333	-1.58511	0.158914	437580	0	1	0	0.1
CG1241	atpE	242	243	0	0	0	0	1	0		29524.5	0	0	0	0
CG1242	atpF	566	567	0	0	0	0	1	0		160744	0	0	0	0
CG1243	atpH	815	816	0	0	0	0	1	0		332928	0	0	0	0
CG1244	atpA	1643	1644	0	0	51	1	0.0189	-5.72547	0.012638	1347258	0	5	0	0.2
CG1245	atpG	977	978	0	0	1	0	0.5	-1	0.158903	477753	0	1	0	0.1
CG1246	atpD	1451	1452	0	0	1	1	0.3333	-1.58511	0.0786853	1052700	0	2	0	0.1
CG1247	atpC	374	375	0	0	1	1	0.3333	-1.58511	0.0787879	69937.5	0	2	0	0.3
CG1248	cgp1370	473	474	0	0	336	350	0.0015	-9.38082	0.00042871	109731	0	11	0	1.2
CG1249	cgp1371	692	693	2948	867	2016	2031	0.9427	-0.0851294	1e-08	227357	3	40	0.2	2.9
CG125	panC	839	835	347	520	1573	1879	0.2514	-1.99194	0	332786	2	40	0.1	2.4
CG1250	cgp1372	287	288	0	0	383	346	0.0014	-9.48036	0.00072114	40032	0	10	0	1.7
CG1251	cgp1373	455	456	0	0	317	785	0.0009	-10.1178	6.1e-07	98724	0	23	0	2.5
CG1252	cgp1374	305	306	0	0	391	1056	0.0007	-10.4804	5.2e-07	43299	0	23	0	3.8
CG1253	cgp1375	923	924	0	519	1808	2418	0.123	-3.02327	0	404301	3	55	0.2	3
CG1254	ssuD1	1145	1146	173	0	5286	2769	0.0216	-5.53282	0	617716	1	69	0	3
CG1255	ssuC	770	771	0	0	1397	2036	0.0003	-11.7027	0	279102	0	47	0	3
CG1256	ssuB	731	732	0	0	1584	1397	0.0003	-11.7027	0	254004	0	38	0	2.6
CG1257	ssuA	959	960	0	0	1854	818	0.0004	-11.2877	0	442080	0	39	0	2
CG1258	glgB	2195	2196	0	0	8104	7264	0.0001	-13.2877	0	2233332	0	168	0	3.8
CG1259	glgE	2027	2028	0	0	1512	2863	0.0002	-12.2877	0	1978314	0	78	0	1.9
CG126	panB	809	810	0	0	1215	1085	0.0004	-11.2877	2e-08	315900	0	31	0	1.9
CG1260	cgp1383	872	873	0	0	835	1593	0.0004	-11.2877	0	364478	0	38	0	2.2
CG1261	cgp1384	800	801	0	173	3008	1579	0.0379	-4.72166	0	299593	1	56	0.1	3.5
CG1262	cgp1385	1163	1164	0	0	2820	4169	0.0001	-13.2877	0	638454	0	71	0	3
CG1263	fixA	788	789	0	0	0	2	0.3333	-1.58511	0.0787154	310472	0	2	0	0.1
CG1264	fixB	953	954	0	0	2	0	0.3333	-1.58511	0.158909	454581	0	1	0	0.1
CG1265	nifS1	1130	1131	346	0	46	40	3.9885	1.99585	0.0479374	636760	2	7	0.1	0.3
CG1266	cgp1390	143	144	0	0	21	73	0.0105	-6.57347	0.0414532	10152	0	3	0	1
CG1267	cgp1391	1148	1145	0	0	2965	1864	0.0002	-12.2877	0	620590	0	61	0	2.7
CG1268	cgp1392	227	228	0	0	44	223	0.0037	-8.07826	0.0225135	25536	0	4	0	0.9
CG1269	cgp1393	506	433	0	0	884	392	0.0008	-10.2877	5.31e-06	89631	0	19	0	2.2
CG127	cgp0150	953	954	0	0	1475	954	0.0004	-11.2877	1e-08	440271	0	31	0	1.6
CG1270	speE2	944	945	347	0	2393	1489	0.0896	-3.48036	0	422912	1	52	0.1	2.8
CG1271	cgp1395	1142	1143	0	0	4811	5620	0.0001	-13.2877	0	605790	0	85	0	3.7
CG1272	cgp1396	398	399	0	0	325	684	0.001	-9.96578	0.00014054	77007	0	13	0	1.6
CG1273	trmU	1097	1098	173	0	0	175	0.9886	-0.0165412	0.0899886	601157	1	4	0	0.2
CG1274	cgp1398	992	989	0	0	2308	1483	0.0003	-11.7027	0	465324	0	48	0	2.4
CG1275	cgp1399	1463	1464	0	0	2050	4801	0.0001	-13.2877	0	1013820	0	80	0	2.7
CG1276	cgp1400	713	714	0	347	3140	3219	0.0547	-4.19232	0	238494	1	47	0.1	3.3
CG1277	ligA	2042	2043	0	0	1	3	0.2	-2.32193	0.0227237	2.08284e+06	0	4	0	0.1
CG1278	cgp1402	665	666	0	0	1546	2825	0.0002	-12.2877	0	210456	0	35	0	2.6
CG1279	gatC	299	300	0	0	0	0	1	0		45000	0	0	0	0
CG128	mag	569	570	0	0	1158	864	0.0005	-10.9658	1.1e-06	156180	0	22	0	1.9
CG1280	gatA	1493	1494	0	0	0	0	1	0		1116018	0	0	0	0
CG1281	cgp1405	851	852	0	0	2464	1481	0.0003	-11.7027	0	344208	0	46	0	2.7
CG1282	cgp1408	320	321	0	0	531	490	0.001	-9.96578	8.59e-06	48631.5	0	18	0	2.8
CG1283	pfk	1031	1032	347	0	662	18	0.511	-0.968605	0.00065535	526326	1	13	0	0.6
CG1284	rbsR	1109	1096	0	0	2019	1149	0.0003	-11.7027	0	578688	0	40	0	1.8
CG1285	rbsA	1574	1575	0	0	5445	3627	0.0001	-13.2877	0	1.15841e+06	0	105	0	3.3
CG1286	rbsC	974	971	0	0	1492	943	0.0004	-11.2877	0	452972	0	38	0	2
CG1287	rbsB	944	945	0	173	1727	2984	0.0369	-4.76024	0	425264	1	47	0.1	2.5
CG1288	rbsD	371	372	0	0	918	957	0.0005	-10.9658	5.13e-06	65658	0	19	0	2.6
CG1289	cgp1417	638	639	0	0	644	514	0.0009	-10.1178	3.31e-06	197770	0	20	0	1.6
CG129	cgp0152	656	657	0	1387	1414	1254	0.52	-0.943416	7e-08	206313	1	31	0.1	2.4
CG1290	cgp1418	1016	1017	0	0	1860	3189	0.0002	-12.2877	0	491720	0	50	0	2.5
CG1291	cgp1419	1007	1008	0	347	2244	1963	0.0827	-3.59597	0	482353	1	54	0	2.7
CG1292	gatB	1505	1506	0	0	0	0	1	0		1134018	0	0	0	0
CG1293	cgp1421	674	675	173	0	2189	1117	0.0526	-4.24879	0	215339	1	38	0.1	2.8
CG1294	cgp1423	1076	1077	0	0	1790	1333	0.0003	-11.7027	0	556270	0	47	0	2.2
CG1295	lysE	701	698	0	0	547	985	0.0007	-10.4804	8e-08	234179	0	27	0	1.9
CG1296	lysG	872	873	0	173	2254	1945	0.0414	-4.59423	0	363181	1	42	0.1	2.4
CG1297	gst	1079	1080	0	0	5069	3888	0.0001	-13.2877	0	537300	0	87	0	4
CG1298	cgp1427	554	555	0	0	1996	1084	0.0003	-11.7027	6.4e-07	147630	0	23	0	2.1
CG1299	cgp1429	1058	1059	0	0	3346	1452	0.0002	-12.2877	0	528441	0	61	0	2.9
CG13	gyrA	2570	2571	0	0	45	0	0.0217	-5.52616	0.00405868	3296022	0	7	0	0.1
CG130	hde	926	927	173	0	2190	2586	0.0364	-4.77992	0	405579	1	53	0.1	2.9
CG1300	ilvD	1841	1842	0	0	1171	1519	0.0004	-11.2877	0	1634775	0	67	0	1.8
CG1301	cgp1433	635	636	0	0	1778	655	0.0004	-11.2877	0	191118	0	36	0	2.8
CG1302	cgp1434	1601	1602	0	0	3992	3258	0.0001	-13.2877	0	1221525	0	78	0	2.4
CG1303	ilvB	1880	1881	0	0	8079	7296	0.0001	-13.2877	0	1642113	0	140	0	3.7
CG1304	ilvN	518	519	0	0	3480	2780	0.0002	-12.2877	0	118072	0	65	0	6.3
CG1305	ilvC	1016	1017	694	0	1054	271	0.5241	-0.932086	3e-08	501397	1	32	0	1.6
CG1306	cgp1438	500	501	0	0	995	1083	0.0005	-10.9658	0	116984	0	34	0	3.4
CG1307	cgp1440	269	270	0	0	216	360	0.0017	-9.20025	0.00695919	35640	0	6	0	1.1
CG1308	cgp1441	884	885	0	0	2905	1727	0.0002	-12.2877	0	365948	0	59	0	3.3
CG1309	cgp1442	434	435	0	0	366	878	0.0008	-10.2877	5.32e-06	90480	0	19	0	2.2
CG131	cgp0154	605	606	0	173	1069	835	0.0913	-3.45324	0	172728	1	37	0.1	3.1
CG1310	cgp1443	371	344	173	0	418	437	0.2033	-2.29832	0.00036286	56939	1	14	0.1	2
CG1311	cgp1444	488	489	0	0	1840	828	0.0004	-11.2877	1.06e-06	114182	0	22	0	2.2
CG1312	cgp1447	956	957	0	0	350	124	0.0021	-8.89539	0.00014925	451704	0	13	0	0.7
CG1313	cgp1448	1817	1818	0	173	4382	2537	0.0251	-5.31617	0	1.57624e+06	1	86	0	2.4
CG1314	cgp1449	1619	1620	0	0	3446	4262	0.0001	-13.2877	0	1253070	0	73	0	2.3
CG1315	serA	1592	1593	173	0	2959	2644	0.031	-5.01159	0	1194789	1	94	0	3
CG1316	cgp1452	869	870	0	173	1175	1157	0.0746	-3.74468	0	361936	1	39	0.1	2.2
CG1317	leuB	1022	1023	0	0	4169	3352	0.0001	-13.2877	0	488994	0	68	0	3.3
CG1318	cgp1454	1031	1032	0	0	2609	2851	0.0002	-12.2877	0	501036	0	61	0	3
CG1319	cgp1456	1856	1857	173	0	5108	4387	0.0183	-5.77201	0	1642543	1	89	0	2.4
CG132	cgp0155	560	540	0	347	1872	1276	0.1105	-3.17788	1e-08	137176	1	33	0.1	3.1
CG1320	dnaQ2	593	594	0	0	1197	427	0.0006	-10.7027	1.658e-05	171369	0	18	0	1.5
CG1321	cgp1458	806	807	0	0	1245	749	0.0005	-10.9658	0	309888	0	39	0	2.4
CG1322	cgp1459	605	606	0	0	588	1634	0.0004	-11.2877	0	173316	0	34	0	2.8
CG1323	entC	1130	1131	0	0	95	8	0.0096	-6.70275	0.0416095	637884	0	3	0	0.1
CG1324	gltS	1481	1482	0	0	68	0	0.0145	-6.1078	0.0786846	1096680	0	2	0	0.1
CG1325	cgp1464	215	216	0	0	152	545	0.0014	-9.48036	0.00218688	22464	0	8	0	1.9
CG1326	cgp1465	473	474	0	173	1688	3363	0.0344	-4.86145	1.1e-07	105712	1	30	0.1	3.2
CG1327	cgp1466	524	525	0	0	663	366	0.001	-9.96578	1.08e-06	132038	0	22	0	2.1
CG1328	cgp1467	455	456	0	0	996	1004	0.0005	-10.9658	2e-07	98268	0	25	0	2.7
CG1329	cgp1468	305	306	0	0	931	1768	0.0004	-11.2877	5.2e-07	43299	0	23	0	3.8
CG133	cysR	1145	1146	0	0	60	211	0.0037	-8.07826	0.00710703	653220	0	6	0	0.3
CG1330	cgp1469	182	183	0	0	1052	704	0.0006	-10.7027	2.22e-06	14914.5	0	20	0	5.5
CG1331	cgpt5026	71	72	0	0	0	0	1	0		2592	0	0	0	0
CG1332	cgpt5027	72	73	0	0	0	0	1	0		2664.5	0	0	0	0
CG1333	cgpt5028	71	72	0	0	0	0	1	0		2592	0	0	0	0
CG1334	cgpt5029	72	73	0	0	0	0	1	0		2664.5	0	0	0	0
CG1335	cgp4019	92	93	0	0	0	268	0.0037	-8.07826	0.02217	4138.5	0	4	0	2.2
CG1336	cgp1470	95	96	0	0	0	0	1	0		4608	0	0	0	0
CG1337	cgp1471	122	123	0	0	93	159	0.004	-7.96578	0.0122011	7257	0	5	0	2
CG1338	cgpt5030	75	76	0	0	245	0	0.0041	-7.93016	0.16186	2850	0	1	0	0.7
CG1339	cgp1472	131	132	0	0	219	604	0.0012	-9.70275	0.00209374	8184	0	8	0	3
CG134	cgp0158	1274	1275	0	0	3741	5289	0.0001	-13.2877	0	768825	0	73	0	2.9
CG1340	cgp1473	185	186	0	0	323	16	0.0029	-8.42973	0.00687264	16740	0	6	0	1.6
CG1341	cgp1474	1145	1146	0	0	1321	798	0.0005	-10.9658	1e-08	638322	0	32	0	1.4
CG1342	cgp1475	326	323	0	0	481	342	0.0012	-9.70275	0.00223646	50872.5	0	8	0	1.2
CG1343	thiC	1763	1760	0	0	3458	2297	0.0002	-12.2877	0	1488960	0	68	0	1.9
CG1344	cgp1478	461	462	0	173	361	1084	0.1203	-3.05529	1.436e-05	102341	1	20	0.1	2.2
CG1345	glgP1	2387	2388	0	0	6304	9335	0.0001	-13.2877	0	2659038	0	164	0	3.4
CG1346	cgp1480	125	126	0	0	305	3	0.0032	-8.28771	0.0223223	7686	0	4	0	1.6
CG1347	cgp1481	158	159	0	0	123	373	0.002	-8.96578	0.00037913	11766	0	11	0	3.5
CG1348	cgp1482	1409	1410	0	0	4837	2745	0.0001	-13.2877	0	938355	0	79	0	2.8
CG1349	cgp1483	752	753	0	0	1661	1427	0.0003	-11.7027	0	267315	0	43	0	2.9
CG135	cgp0159	518	519	0	0	715	616	0.0008	-10.2877	2e-08	127155	0	29	0	2.8
CG1350	cgp1484	479	480	0	0	1087	518	0.0006	-10.7027	2.778e-05	111360	0	16	0	1.7
CG1351	cgp1485	566	549	0	173	1845	1291	0.0555	-4.17137	0	141105	1	37	0.1	3.4
CG1352	cgp1486	707	708	0	173	1740	1718	0.0503	-4.3133	0	235074	1	46	0.1	3.2
CG1353	leuC	1445	1446	0	0	6557	6528	0.0001	-13.2877	0	967374	0	111	0	3.8
CG1354	leuD	593	594	0	0	1762	2758	0.0002	-12.2877	0	165132	0	38	0	3.2
CG1355	cgp1490	1010	1011	0	0	2137	2622	0.0002	-12.2877	0	478203	0	66	0	3.3
CG1356	cgp1491	158	159	173	0	161	70	0.75	-0.415037	0.0907779	12404	1	4	0.3	1.3
CG1357	gpsA	998	999	0	0	413	0	0.0024	-8.70275	0.0416065	497502	0	3	0	0.2
CG1358	ddlA	1082	1083	0	0	1	0	0.5	-1	0.158879	585903	0	1	0	0
CG1359	cgp1494	980	981	0	0	220	55	0.0036	-8.11779	0.0023048	477256	0	8	0	0.4
CG136	cgp0160	422	423	0	0	688	460	0.0009	-10.1178	1.578e-05	85869	0	17	0	2
CG1360	thiL	917	918	0	0	1	0	0.5	-1	0.158919	420903	0	1	0	0.1
CG1361	ung	749	749	346	0	3056	2484	0.0626	-3.99769	0	259942	2	58	0.1	3.9
CG1362	cgp1497	1703	1704	0	0	119	2	0.0082	-6.93016	0.0126393	1447548	0	5	0	0.1
CG1363	cgp1498	2123	2124	0	0	2179	3929	0.0002	-12.2877	0	2163294	0	87	0	2
CG1364	cgp1499	215	216	0	0	216	92	0.0032	-8.28771	0.0124037	22788	0	5	0	1.2
CG1365	cgp1500	584	584	0	0	1021	901	0.0005	-10.9658	0	158848	0	40	0	3.4
CG1366	coaD	482	483	0	0	0	0	1	0		116644	0	0	0	0
CG1367	cgp1502	764	765	173	0	1084	1649	0.0636	-3.97483	0	277711	1	40	0.1	2.6
CG1368	cgp1503	950	951	520	0	1839	2798	0.1123	-3.15457	0	427975	1	53	0.1	2.8
CG1369	cgp1504	983	984	0	0	1727	2144	0.0003	-11.7027	0	450672	0	70	0	3.6
CG137	cgp0161	1943	1944	173	0	6549	5617	0.0143	-6.12784	0	1.75645e+06	1	139	0	3.6
CG1370	cgp1505	809	810	0	0	1920	1487	0.0003	-11.7027	0	310230	0	44	0	2.7
CG1371	cgp1506	980	981	0	0	2634	2630	0.0002	-12.2877	0	450770	0	65	0	3.3
CG1372	cgpt5031	76	77	0	0	0	1	0.5	-1	0.161818	2926	0	1	0	0.6
CG1373	polA	2669	2666	520	0	171	472	0.809	-0.305788	1.646e-05	3528461	1	20	0	0.4
CG1374	cgp1526	1400	1401	0	347	3430	2952	0.0545	-4.1976	0	938697	1	63	0	2.2
CG1375	cgp1527	977	978	0	173	2996	2846	0.0298	-5.06854	0	448920	1	63	0.1	3.2
CG1376	dkgX	875	876	0	0	1950	1682	0.0003	-11.7027	0	363102	0	48	0	2.7
CG1377	cgp1529	161	162	0	0	0	104	0.0095	-6.71786	0.0789707	12960	0	2	0	0.6
CG1378	cgp1530	830	831	0	0	1352	2812	0.0002	-12.2877	0	331154	0	35	0	2.1
CG1379	rpsA	1460	1461	0	0	0	0	1	0		1.06726e+06	0	0	0	0
CG138	cgp0162	1541	1538	0	0	3498	4605	0.0001	-13.2877	0	1121971	0	80	0	2.6
CG1380	ptsG	2051	2052	0	0	1970	2106	0.0002	-12.2877	0	2025324	0	78	0	1.9
CG1381	coaE	602	603	0	5376	3	0	1344.25	10.3926	0.5	181805	1	1	0.1	0.1
CG1382	cgp1540	1085	1086	0	0	2166	2882	0.0002	-12.2877	0	557661	0	62	0	2.9
CG1383	cgp1541	509	510	0	0	1360	1470	0.0004	-11.2877	1e-08	122400	0	30	0	2.9
CG1384	cgp1542	248	167	0	0	111	49	0.0062	-7.33352	0.0224272	13610.5	0	4	0	1.2
CG1385	uriH	938	939	0	0	1968	1970	0.0003	-11.7027	0	417386	0	51	0	2.7
CG1386	uriT	1451	1452	0	0	3112	2914	0.0002	-12.2877	0	998976	0	76	0	2.6
CG1387	rbsK1	923	916	0	0	2049	2564	0.0002	-12.2877	0	395254	0	55	0	3
CG1388	uriR	1040	1041	0	173	1765	2501	0.0408	-4.61529	0	516871	1	49	0	2.4
CG1389	cgp1548	659	660	0	0	724	305	0.001	-9.96578	1.678e-05	212190	0	17	0	1.3
CG139	cgp0163	1463	1464	0	520	6569	5339	0.0437	-4.51622	0	989744	2	116	0.1	4
CG1390	cgp1549	332	333	0	0	378	853	0.0008	-10.2877	4.552e-05	52947	0	15	0	2.3
CG1391	uvrB	2099	2100	0	173	4499	3758	0.0211	-5.56661	0	2124179	1	78	0	1.9
CG1392	uspA1	443	444	0	0	396	63	0.0022	-8.82828	0.00226406	96792	0	8	0	0.9
CG1393	qorR	383	384	0	0	659	961	0.0006	-10.7027	1.551e-05	70464	0	18	0	2.3
CG1394	qor2	848	849	0	0	2711	1942	0.0002	-12.2877	0	336204	0	61	0	3.6
CG1395	cgp1555	2267	2268	0	0	5134	4572	0.0001	-13.2877	0	2444904	0	112	0	2.5
CG1396	cgp1556	914	915	0	0	3134	4125	0.0001	-13.2877	0	392078	0	59	0	3.2
CG1397	cgp1559	602	603	0	0	2212	2049	0.0002	-12.2877	0	167634	0	48	0	4
CG1398	uvrA	2849	2833	347	0	9130	6659	0.022	-5.50635	0	3756642	1	185	0	3.3
CG1399	cgp1562	2126	2127	0	0	5270	5112	0.0001	-13.2877	0	2.13657e+06	0	120	0	2.8
CG14	cgp0016	344	345	0	0	1050	761	0.0006	-10.7027	3e-08	54682.5	0	28	0	4.1
CG140	cgp0165	1733	1734	0	347	4124	5781	0.0351	-4.83239	0	1.3994e+06	1	124	0	3.6
CG1400	infC	569	570	0	0	0	0	1	0		162450	0	0	0	0
CG1401	rpmL	194	195	0	0	0	0	1	0		19012.5	0	0	0	0
CG1402	rplT	383	384	0	0	330	0	0.003	-8.38082	0.0125215	72768	0	5	0	0.7
CG1403	cgp1566	812	813	0	173	1431	3391	0.0361	-4.79186	1e-08	317078	1	35	0.1	2.2
CG1404	cgp1567	491	492	0	0	292	329	0.0016	-9.28771	0.00129954	118818	0	9	0	0.9
CG1405	ugpA	932	929	0	173	536	1867	0.0724	-3.78787	1.87e-06	420846	1	24	0.1	1.3
CG1406	ugpE	836	837	0	0	1803	1298	0.0003	-11.7027	1e-08	337311	0	31	0	1.9
CG1407	ugpB	1316	1317	0	1040	4631	3733	0.1244	-3.00694	0	813947	1	84	0	3.2
CG1408	ugpC	1226	1227	0	0	3091	3274	0.0002	-12.2877	0	707979	0	73	0	3
CG1409	glpQ2	707	708	0	0	2599	386	0.0003	-11.7027	0	235410	0	44	0	3.1
CG141	cgp0166	1067	1068	173	0	1992	2122	0.0423	-4.5632	0	539364	1	60	0	2.8
CG1410	cgp1573	815	816	0	0	1765	898	0.0004	-11.2877	0	318240	0	36	0	2.2
CG1411	pheS	1037	1038	0	0	2	0	0.3333	-1.58511	0.0786996	537684	0	2	0	0.1
CG1412	cgp1575	2507	2508	0	0	1	2	0.25	-2	0.041622	3141270	0	3	0	0.1
CG1413	cgp1577	974	975	0	347	4556	3718	0.0421	-4.57004	0	438296	1	80	0.1	4.1
CG1414	cgp1578	1385	1386	0	0	3910	2216	0.0002	-12.2877	0	912681	0	69	0	2.5
CG1415	cgp1579	404	405	0	0	1101	873	0.0005	-10.9658	5.24e-06	78165	0	19	0	2.3
CG1416	argC	1043	1044	0	173	3642	2241	0.0296	-5.07826	0	506368	1	75	0	3.6
CG1417	argJ	1166	1167	173	693	3017	3939	0.1246	-3.00462	0	638432	3	79	0.1	3.4
CG1418	argB	953	954	0	520	3495	2446	0.0877	-3.51128	0	430754	1	52	0.1	2.7
CG1419	argD	1175	1176	520	0	2798	4728	0.0692	-3.85308	0	648598	1	75	0	3.2
CG142	cgp0167	758	759	0	0	2613	1619	0.0002	-12.2877	0	269824	0	49	0	3.2
CG1420	argF	959	960	0	0	1429	213	0.0006	-10.7027	4.1e-07	449280	0	24	0	1.2
CG1421	argR	515	516	0	0	639	0	0.0016	-9.28771	0.00014388	129774	0	13	0	1.3
CG1422	argG	1205	1206	520	0	5918	5425	0.0459	-4.44536	0	658530	1	118	0	4.9
CG1423	argH	1433	1434	694	1040	6653	8080	0.1178	-3.08559	0	947304	3	118	0.1	4.1
CG1424	cgp1589	1145	1142	0	0	3216	2376	0.0002	-12.2877	0	614967	0	65	0	2.8
CG1425	cgp1590	1577	1578	0	0	2915	2463	0.0002	-12.2877	0	1189812	0	71	0	2.2
CG1426	cgp1591	614	601	0	4162	844	864	2.4359	1.28445	4e-08	171601	1	31	0.1	2.6
CG1427	cgp1592	179	180	0	0	0	0	1	0		16200	0	0	0	0
CG1428	tyrS	1262	1263	0	0	0	217	0.0046	-7.76415	0.0786907	796322	0	2	0	0.1
CG1429	uspA2	467	468	0	0	1212	1253	0.0004	-11.2877	2e-08	102726	0	29	0	3.1
CG143	cgp0168	881	882	173	0	2304	2858	0.0337	-4.89111	0	367369	1	50	0.1	2.8
CG1430	cgpr5117	1523	1524	0	0	0	0	1	0		1161288	0	0	0	0
CG1431	cgpr5129	3085	3086	0	0	38	0	0.0256	-5.28771	0.0786664	4758612	0	2	0	0
CG1432	cgpr5105	119	120	0	0	0	0	1	0		7200	0	0	0	0
CG1433	cgp1597	1304	1305	173	0	840	536	0.1264	-2.98393	4e-07	834557	1	27	0	1
CG1434	cgp1598	986	987	0	0	779	1339	0.0005	-10.9658	1e-08	471786	0	31	0	1.6
CG1435	cgp1599	164	165	0	0	96	11	0.0093	-6.74855	0.00683741	13117.5	0	6	0	1.8
CG1436	cgp1600	821	822	0	0	843	770	0.0006	-10.7027	1.18e-06	328800	0	22	0	1.3
CG1437	ppnK	962	962	0	0	71	5	0.013	-6.26534	0.0126128	460317	0	5	0	0.3
CG1438	recN	1781	1782	0	0	4126	3507	0.0001	-13.2877	0	1504008	0	94	0	2.6
CG1439	cgp1603	1184	1185	519	0	3322	1465	0.1086	-3.2029	0	678456	3	44	0.1	1.9
CG144	cgp0170	719	720	0	0	1741	1790	0.0003	-11.7027	0	243720	0	44	0	3.1
CG1440	cgp1604	965	966	0	0	1505	1318	0.0004	-11.2877	3e-08	452571	0	32	0	1.7
CG1441	pyrG	1664	1665	0	0	2106	2974	0.0002	-12.2877	0	1.31618e+06	0	84	0	2.5
CG1442	cgp1607	671	668	173	520	650	517	0.5942	-0.750979	2.48e-06	215122	2	26	0.1	1.9
CG1443	xerD	914	915	0	0	152	224	0.0027	-8.53282	0.00402838	415410	0	7	0	0.4
CG1444	cgp1609	1532	1533	0	0	5298	2611	0.0001	-13.2877	0	1109892	0	85	0	2.8
CG1445	parA2	872	873	0	0	1848	1059	0.0003	-11.7027	0	363168	0	41	0	2.3
CG1446	scpA	767	768	0	0	691	587	0.0008	-10.2877	1.99e-06	286848	0	22	0	1.4
CG1447	cgp1612	563	564	0	0	1717	713	0.0004	-11.2877	0	149742	0	33	0	2.9
CG1448	sseA2	869	870	520	0	2456	2383	0.1076	-3.21625	0	356726	1	51	0.1	2.9
CG1449	scpB	578	579	0	0	1208	1365	0.0004	-11.2877	1e-08	158646	0	32	0	2.8
CG145	cgp0171	335	328	0	0	521	154	0.0015	-9.38082	0.00023928	51824	0	12	0	1.8
CG1450	rluA	962	963	0	0	7	0	0.125	-3	0.158907	463203	0	1	0	0.1
CG1451	cmk	710	707	0	0	0	108	0.0092	-6.76415	0.0415959	248864	0	3	0	0.2
CG1452	cgp1617	1631	1628	0	0	1	1	0.3333	-1.58511	0.0786815	1323564	0	2	0	0.1
CG1453	cgp1618	668	669	0	0	773	1044	0.0006	-10.7027	1.3e-07	215084	0	26	0	1.9
CG1454	cgp1619	500	501	0	0	1385	1140	0.0004	-11.2877	4e-08	118486	0	28	0	2.8
CG1455	cgp1620	815	816	0	0	1484	998	0.0004	-11.2877	1e-08	320280	0	32	0	2
CG1456	cgp1621	1418	1419	0	0	3518	2865	0.0002	-12.2877	0	950730	0	79	0	2.8
CG1457	cgp1622	1769	1766	173	0	4645	2871	0.0231	-5.43596	0	1.48171e+06	1	89	0	2.5
CG1458	cgp1623	806	807	0	0	28	0	0.0345	-4.85726	0.0226832	324010	0	4	0	0.2
CG1459	cgp1624	1550	1547	0	0	3102	3012	0.0002	-12.2877	0	1.15484e+06	0	54	0	1.7
CG146	panD	410	411	0	0	335	540	0.0011	-9.82828	8.136e-05	81583.5	0	15	0	1.8
CG1460	cgp1625	188	189	0	0	295	9	0.0033	-8.24332	0.0224647	17482.5	0	4	0	1.1
CG1461	cgpt5032	76	77	0	0	0	246	0.004	-7.96578	0.0412964	2849	0	3	0	1.9
CG1462	cgp1626	389	390	0	0	596	860	0.0007	-10.4804	1.73e-06	71955	0	21	0	2.7
CG1463	cgp1628	1181	1182	0	347	2175	4297	0.0538	-4.21625	0	658996	1	70	0	3
CG1464	secA2	2291	2292	0	0	2	3	0.1667	-2.58467	0.041621	2623194	0	3	0	0.1
CG1465	cgp1630	431	432	0	0	1332	793	0.0005	-10.9658	2e-08	87048	0	31	0	3.6
CG1466	cgp1631	758	759	0	0	950	131	0.0009	-10.1178	1.99e-06	280071	0	21	0	1.4
CG1467	cgp1632	635	636	0	0	509	688	0.0008	-10.2877	0.00014606	198114	0	13	0	1
CG1468	cgp1633	575	576	0	0	1008	227	0.0008	-10.2877	1.9e-06	159840	0	21	0	1.8
CG1469	cgp1635	512	513	0	0	515	818	0.0007	-10.4804	6.3e-07	125685	0	24	0	2.3
CG147	cgp0173	1661	1662	0	0	2307	1889	0.0002	-12.2877	0	1309656	0	88	0	2.6
CG1470	cgp1636	1451	1452	0	0	2273	3886	0.0002	-12.2877	0	999702	0	76	0	2.6
CG1471	cgp1638	893	894	0	0	2166	2511	0.0002	-12.2877	0	377715	0	50	0	2.8
CG1472	cgp1639	1064	1065	1214	0	2464	2076	0.2676	-1.90185	0	534693	2	64	0.1	3
CG1473	cgp1640	1382	1379	0	173	3885	3504	0.0235	-5.4112	0	903960	1	69	0	2.5
CG1474	cgp1641	1346	1347	0	0	1899	3771	0.0002	-12.2877	0	866794	0	61	0	2.3
CG1475	cgp1642	737	738	0	0	1128	1560	0.0004	-11.2877	0	257931	0	39	0	2.6
CG1476	gnd	1454	1455	0	0	79	250	0.003	-8.38082	0.0416146	1056330	0	3	0	0.1
CG1477	cgp1644	464	465	0	0	535	626	0.0009	-10.1178	1.603e-05	104160	0	18	0	1.9
CG1478	cgp1645	584	585	0	173	1472	1752	0.054	-4.2109	0	159721	1	40	0.1	3.4
CG1479	cgp1646	743	740	0	0	2332	1826	0.0002	-12.2877	0	258630	0	41	0	2.8
CG148	cgp0174	1139	1140	0	173	2360	4046	0.0272	-5.20025	0	613908	1	64	0	2.8
CG1480	cgp1647	743	744	0	0	2888	1436	0.0002	-12.2877	0	261144	0	44	0	3
CG1481	cgp1648	881	853	0	0	3416	4639	0.0001	-13.2877	0	341626	0	53	0	3.1
CG1482	pctD	848	845	0	0	1917	3431	0.0002	-12.2877	0	332085	0	59	0	3.5
CG1483	pctC	806	807	0	0	2646	2182	0.0002	-12.2877	0	303028	0	56	0	3.5
CG1484	pctB	806	803	0	520	1521	2324	0.1355	-2.88364	0	299948	1	59	0.1	3.7
CG1485	pctA	1052	1053	173	867	4461	3854	0.1252	-2.99769	0	508671	2	91	0.1	4.3
CG1486	pgp1	704	705	0	0	1086	800	0.0005	-10.9658	1.3e-07	239348	0	28	0	2
CG1487	thiD1	2291	2292	173	0	5359	7070	0.014	-6.15843	0	2.48457e+06	1	129	0	2.8
CG1488	thiM	806	807	867	0	1410	2045	0.2512	-1.99309	0	305475	1	52	0.1	3.2
CG1489	ndh	1403	1404	0	0	149	345	0.002	-8.96578	6.13e-06	972270	0	19	0	0.7
CG149	cgp0175	491	492	0	0	799	1015	0.0006	-10.7027	9.38e-06	116604	0	18	0	1.8
CG1490	ufaA	1316	1317	0	346	3726	4133	0.0441	-4.50308	0	805420	2	96	0.1	3.6
CG1491	cgp1658	1388	1389	0	0	2427	1858	0.0002	-12.2877	0	923685	0	59	0	2.1
CG1492	gpt	476	477	0	0	1178	1441	0.0004	-11.2877	0	105656	0	34	0	3.6
CG1493	cgp1660	572	573	0	0	589	1047	0.0006	-10.7027	5.59e-06	158721	0	19	0	1.7
CG1494	cgp1661	998	999	0	0	731	653	0.0007	-10.4804	1e-08	483016	0	32	0	1.6
CG1495	cgp1662	485	486	0	0	1054	0	0.0009	-10.1178	4.799e-05	114453	0	15	0	1.5
CG1496	cgp1663	665	666	0	0	280	105	0.0026	-8.58727	0.00707404	219780	0	6	0	0.5
CG1497	cgp1664	1517	1518	0	0	526	1270	0.0006	-10.7027	9e-08	1131669	0	27	0	0.9
CG1498	cgp1665	617	618	0	0	310	991	0.0008	-10.2877	1.12e-06	184164	0	22	0	1.8
CG1499	cgp1668	191	192	0	0	32	619	0.0015	-9.38082	0.00216838	17664	0	8	0	2.1
CG15	cgpt5001	76	77	0	0	0	0	1	0		2964.5	0	0	0	0
CG150	cgp0176	782	783	0	0	2499	1931	0.0002	-12.2877	0	288927	0	48	0	3.1
CG1500	cgp1669	743	744	0	0	97	0	0.0102	-6.61529	0.158981	276396	0	1	0	0.1
CG1501	cgp1670	338	339	0	0	263	425	0.0015	-9.38082	0.00127726	55935	0	9	0	1.3
CG1502	cgp1671	398	399	0	0	120	20	0.0071	-7.13797	0.0226148	78802.5	0	4	0	0.5
CG1503	ppmC	812	813	2426	2773	82	129	24.5283	4.61638	0.00296049	335814	18	5	1.1	0.3
CG1504	ppmN	1637	1638	0	694	3587	4848	0.0824	-3.60121	0	1.27441e+06	1	84	0	2.6
CG1505	cgp1675	563	564	0	0	1210	1179	0.0004	-11.2877	1.1e-06	152844	0	23	0	2
CG1506	lip3	1307	1308	0	0	3968	2725	0.0001	-13.2877	0	805074	0	77	0	2.9
CG1507	cgp1677	776	777	0	0	2312	1360	0.0003	-11.7027	0	286713	0	39	0	2.5
CG1508	cobL	1292	1258	0	0	5711	3720	0.0001	-13.2877	0	730269	0	98	0	3.9
CG1509	cgp4020	362	363	0	0	1950	1526	0.0003	-11.7027	0	58261.5	0	43	0	5.9
CG151	cgp0177	377	378	0	0	513	1512	0.0005	-10.9658	1e-08	65772	0	30	0	4
CG1510	cgp1679	248	245	0	0	283	744	0.001	-9.96578	0.00220447	29032.5	0	8	0	1.6
CG1511	cgp1680	740	741	173	0	1885	2472	0.0399	-4.64747	0	257882	1	49	0.1	3.3
CG1512	pepE	1139	1136	0	0	2888	2956	0.0002	-12.2877	0	603216	0	76	0	3.3
CG1513	cgp1682	641	642	0	0	2780	2830	0.0002	-12.2877	0	192600	0	42	0	3.3
CG1514	cgp1683	2789	2790	0	0	8233	6963	0.0001	-13.2877	0	3663270	0	169	0	3
CG1515	tatC	944	945	0	0	261	333	0.0017	-9.20025	0.00025647	440842	0	12	0	0.6
CG1516	tatX	317	318	0	0	0	6	0.1429	-2.80692	0.159417	50403	0	1	0	0.2
CG1517	cgp1686	983	984	173	0	3961	2416	0.0273	-5.19496	0	454134	1	64	0.1	3.3
CG1518	cgp1687	977	978	0	0	2494	2498	0.0002	-12.2877	0	451347	0	59	0	3
CG1519	pafA2	1448	1449	0	867	2219	1738	0.2193	-2.18902	0	1007085	1	60	0	2.1
CG152	hrpB	2429	2430	173	0	4227	4707	0.0195	-5.68038	0	2.80427e+06	1	124	0	2.6
CG1520	pup	194	195	0	0	411	1826	0.0004	-11.2877	2.282e-05	17452.5	0	16	0	4.1
CG1521	pafA1	1544	1545	0	0	5035	4322	0.0001	-13.2877	0	1.11781e+06	0	102	0	3.3
CG1522	mpa	1583	1584	0	173	2222	3131	0.0325	-4.94342	0	1.18329e+06	1	92	0	2.9
CG1523	pimT	836	837	0	173	2207	5123	0.0237	-5.39897	0	325194	1	63	0.1	3.8
CG1524	pepC	1262	1263	520	0	3748	4562	0.0627	-3.99539	0	737008	1	97	0	3.8
CG1525	cgp1694	836	837	0	0	4145	2447	0.0002	-12.2877	0	329360	0	51	0	3
CG1526	cgp1695	260	261	0	0	992	443	0.0007	-10.4804	2.483e-05	31972.5	0	16	0	3.1
CG1527	cgp1696	1211	1212	0	173	4053	4564	0.0202	-5.6295	0	676326	1	98	0	4
CG1528	cgp1697	1580	1581	0	173	4616	5556	0.0171	-5.86986	0	1155754	1	121	0	3.8
CG1529	hisG	845	846	0	0	2841	2732	0.0002	-12.2877	0	332901	0	59	0	3.5
CG153	cgp0179	317	318	0	0	330	0	0.003	-8.38082	0.00698826	49608	0	6	0	0.9
CG1530	hisE	263	264	0	0	763	498	0.0008	-10.2877	8.6e-07	31944	0	22	0	4.2
CG1531	cgp1700	695	696	0	173	2116	1348	0.0502	-4.31617	0	227608	1	44	0.1	3.2
CG1532	metH	3590	3591	694	693	13083	12743	0.0537	-4.21893	0	5975884	4	271	0.1	3.8
CG1533	cgp1702	572	573	0	0	827	888	0.0006	-10.7027	2.2e-07	157002	0	25	0	2.2
CG1534	cgp1703	1028	1025	0	0	1331	881	0.0005	-10.9658	5e-08	510962	0	28	0	1.4
CG1535	cgp1704	359	360	520	0	1509	1183	0.1935	-2.36959	8e-08	59425	2	32	0.3	4.4
CG1536	arsC2	1112	1113	0	520	3856	2830	0.0779	-3.68223	0	589915	1	55	0	2.5
CG1537	cgp1706	422	423	0	0	1186	474	0.0006	-10.7027	2.728e-05	86080.5	0	16	0	1.9
CG1538	cgp1707	641	642	0	0	1417	840	0.0004	-11.2877	3.32e-06	199662	0	22	0	1.7
CG1539	cgp1708	380	381	0	0	661	473	0.0009	-10.1178	8.061e-05	69913.5	0	14	0	1.8
CG154	maa	677	651	0	347	971	1410	0.1461	-2.77497	3.04e-06	204750	1	24	0.1	1.8
CG1540	mshC	1262	1263	0	0	2863	1744	0.0002	-12.2877	0	761589	0	58	0	2.3
CG1541	bacA	881	882	0	0	1	281	0.0035	-8.15843	0.00709329	386316	0	6	0	0.3
CG1542	cgp1711	950	951	0	0	326	233	0.0018	-9.11779	5.074e-05	445068	0	15	0	0.8
CG1543	lppL	1025	1026	0	0	0	0	1	0		526338	0	0	0	0
CG1544	pyrD	1115	1116	0	0	296	1	0.0034	-8.20025	0.0416092	621054	0	3	0	0.1
CG1545	cgp1714	353	354	0	0	291	1823	0.0005	-10.9658	1.527e-05	59649	0	17	0	2.4
CG1546	cgp1715	305	306	0	0	0	0	1	0		46818	0	0	0	0
CG1547	cgp1716	1160	1161	0	0	90	0	0.011	-6.50635	0.158864	673380	0	1	0	0
CG1548	cgp1717	434	435	347	0	1588	811	0.145	-2.78588	2.82e-06	89839	1	23	0.1	2.6
CG1549	cgp1718	533	534	0	0	2578	2219	0.0002	-12.2877	0	130563	0	46	0	4.3
CG155	alkB	692	693	0	0	1902	1765	0.0003	-11.7027	0	226264	0	44	0	3.2
CG1550	tetB	1799	1800	0	0	6227	5958	0.0001	-13.2877	0	1507500	0	126	0	3.5
CG1551	tetA	1610	1611	0	0	4503	4858	0.0001	-13.2877	0	1.21711e+06	0	101	0	3.1
CG1552	cgpt5033	85	86	0	0	0	0	1	0		3698	0	0	0	0
CG1553	cgpt5034	88	89	0	0	0	0	1	0		3960.5	0	0	0	0
CG1554	cgp1722	611	612	0	0	1225	1414	0.0004	-11.2877	4e-08	178704	0	30	0	2.5
CG1555	cgp1724	1091	1092	0	0	1550	1919	0.0003	-11.7027	0	568932	0	50	0	2.3
CG1556	mcmB	2213	2206	0	0	5524	5734	0.0001	-13.2877	0	2289828	0	134	0	3
CG1557	mcmA	1850	1851	0	0	5109	5266	0.0001	-13.2877	0	1.6187e+06	0	104	0	2.8
CG1558	cgp1727	776	777	0	0	2349	1777	0.0002	-12.2877	0	285936	0	42	0	2.7
CG1559	cgp1728	599	600	0	0	3069	1135	0.0002	-12.2877	0	168600	0	38	0	3.2
CG156	tagA2	557	558	0	0	1276	1847	0.0003	-11.7027	0	145917	0	35	0	3.1
CG1560	cgp1730	1298	1299	0	0	3394	2907	0.0002	-12.2877	0	793689	0	79	0	3
CG1561	cgp1731	428	429	0	0	1456	1911	0.0003	-11.7027	1e-08	85371	0	33	0	3.8
CG1562	cgp1732	845	846	0	0	720	1579	0.0004	-11.2877	2e-08	345168	0	30	0	1.8
CG1563	cgp1733	785	786	0	0	2779	2862	0.0002	-12.2877	0	286497	0	58	0	3.7
CG1564	hemH	1112	1109	0	0	576	411	0.001	-9.96578	0.00132739	609950	0	9	0	0.4
CG1565	cgp1735	1892	1893	173	520	3673	3983	0.0906	-3.46435	0	1701892	2	97	0.1	2.6
CG1566	cgp1736	500	501	0	173	88	382	0.3694	-1.43674	0.00109532	122750	1	12	0.1	1.2
CG1567	acn	2831	2832	0	0	0	0	1	0		4010112	0	0	0	0
CG1568	acnR	566	567	0	0	209	229	0.0023	-8.76415	1.648e-05	155925	0	18	0	1.6
CG1569	cgp1739	758	751	0	0	1509	1845	0.0003	-11.7027	0	269609	0	34	0	2.3
CG157	cgp0183	680	681	0	0	1310	1386	0.0004	-11.2877	0	220304	0	34	0	2.5
CG1570	cgp1740	665	666	0	0	2296	3062	0.0002	-12.2877	0	203463	0	56	0	4.2
CG1571	cgp1741	254	255	0	0	729	390	0.0009	-10.1178	7.568e-05	30727.5	0	14	0	2.7
CG1572	cgp1742	269	270	0	0	1087	845	0.0005	-10.9658	2.503e-05	34290	0	16	0	3
CG1573	cgp1743	1388	1389	0	0	3940	2409	0.0002	-12.2877	0	913268	0	76	0	2.7
CG1574	pacL	2678	2675	0	0	3798	4386	0.0001	-13.2877	0	3426675	0	114	0	2.1
CG1575	cgp1745	491	492	0	0	967	1165	0.0005	-10.9658	3.6e-07	115128	0	24	0	2.4
CG1576	cgp1753	1631	1632	0	0	2900	2912	0.0002	-12.2877	0	1268064	0	78	0	2.4
CG1577	cgp1754	1478	1479	0	0	4572	3052	0.0001	-13.2877	0	1.04048e+06	0	73	0	2.5
CG1578	nanH	1199	1200	0	0	3576	2705	0.0002	-12.2877	0	673800	0	79	0	3.3
CG1579	tnp3b	710	711	0	0	0	0	1	0		252760	0	0	0	0
CG158	cgp0184	293	293	0	0	1351	526	0.0005	-10.9658	4.8e-06	40141	0	19	0	3.2
CG1580	cgp1758	587	588	0	0	1747	1310	0.0003	-11.7027	1e-08	163758	0	32	0	2.7
CG1581	cgp1759	413	414	0	0	70	154	0.0044	-7.82828	0.00702625	84456	0	7	0	0.8
CG1582	sufU	449	450	0	0	0	149	0.0067	-7.22162	0.078765	100800	0	2	0	0.2
CG1583	sufS	1265	1265	0	0	0	288	0.0035	-8.15843	0.0786906	798848	0	2	0	0.1
CG1584	sufC	758	759	0	0	1	0	0.5	-1	0.158974	287661	0	1	0	0.1
CG1585	sufD	1178	1179	0	0	1	0	0.5	-1	0.158861	694431	0	1	0	0
CG1586	sufB	1445	1446	0	0	0	1	0.5	-1	0.158823	1044735	0	1	0	0
CG1587	sufR	686	687	0	0	1381	1960	0.0003	-11.7027	0	224306	0	34	0	2.5
CG1588	cgp1766	1775	1776	0	0	503	276	0.0013	-9.58727	0.00044827	1567320	0	11	0	0.3
CG1589	cgp1767	1022	1023	520	0	1572	1259	0.184	-2.44222	0	495671	1	57	0	2.8
CG159	cgp0185	854	855	0	0	1576	1623	0.0003	-11.7027	0	344138	0	52	0	3
CG1590	cgp1768	806	807	0	0	1528	1375	0.0003	-11.7027	0	308678	0	44	0	2.7
CG1591	ctaA	1040	1041	0	0	9	70	0.0125	-6.32193	0.0226983	539758	0	4	0	0.2
CG1592	cgp1770	2351	2352	173	0	5736	6070	0.0147	-6.08804	0	2.60841e+06	1	142	0	3
CG1593	qor3	968	969	0	694	6292	4247	0.0659	-3.92358	0	426404	1	92	0.1	4.7
CG1594	ctaB	932	933	0	0	297	172	0.0021	-8.89539	0.00132317	431046	0	9	0	0.5
CG1595	tkt	2102	2103	0	0	177	439	0.0016	-9.28771	0.00405495	2203944	0	7	0	0.2
CG1596	tal	1082	1083	0	0	3738	2786	0.0002	-12.2877	0	540958	0	84	0	3.9
CG1597	zwf	1544	1545	0	0	1126	1591	0.0004	-11.2877	0	1.15025e+06	0	57	0	1.8
CG1598	opcA	959	960	0	0	860	163	0.001	-9.96578	3e-08	446880	0	29	0	1.5
CG1599	pgl	707	708	0	0	125	173	0.0033	-8.24332	0.00025334	246384	0	12	0	0.8
CG16	cgpt5002	72	73	0	0	0	0	1	0		2664.5	0	0	0	0
CG160	cgp0186	344	345	173	0	1579	967	0.0683	-3.87197	1.6e-07	54864	1	28	0.1	4.1
CG1600	soxA	407	408	520	0	1246	1472	0.1916	-2.38383	9.3e-07	78348.5	1	26	0.1	3.2
CG1601	tnp13b	1403	1404	0	0	0	0	1	0		985608	0	0	0	0
CG1602	soxA'	842	843	520	0	2510	1943	0.117	-3.09542	0	334292	2	52	0.1	3.1
CG1603	ocd	1148	1149	0	0	1180	2431	0.0003	-11.7027	0	637120	0	40	0	1.7
CG1604	amt	1358	1355	347	0	4655	3628	0.042	-4.57347	0	870615	1	73	0	2.7
CG1605	secG	233	234	0	0	0	0	1	0		27378	0	0	0	0
CG1606	ppc	2759	2760	0	0	9792	13509	0	#NUM!	0	3490020	0	237	0	4.3
CG1607	tpi	779	780	0	0	9	81	0.011	-6.50635	0.0415993	303030	0	3	0	0.2
CG1608	pgk	1217	1218	0	0	1	134	0.0074	-7.07826	0.0786922	740544	0	2	0	0.1
CG1609	gap	1004	1005	0	0	90	184	0.0036	-8.11779	0.00403258	501495	0	7	0	0.3
CG161	cgp0187	893	894	173	0	1231	1388	0.0664	-3.91267	0	383986	1	36	0.1	2
CG1610	cgp1792	983	984	0	0	117	0	0.0085	-6.87832	0.158901	483636	0	1	0	0.1
CG1611	cgp1793	1025	1026	0	0	4889	1995	0.0001	-13.2877	0	493506	0	65	0	3.2
CG1612	cgp1794	929	930	0	173	2329	2672	0.0348	-4.84477	0	405962	1	59	0.1	3.2
CG1613	uvrC	2090	2091	0	0	4711	2773	0.0001	-13.2877	0	2091000	0	92	0	2.2
CG1614	ribX	581	582	0	0	133	0	0.0075	-7.05889	0.0787388	168780	0	2	0	0.2
CG1615	ribH	479	480	0	0	2815	2178	0.0002	-12.2877	0	105600	0	43	0	4.5
CG1616	ribA	1268	1269	0	0	6561	6170	0.0001	-13.2877	0	732848	0	116	0	4.6
CG1617	ribC	635	636	0	0	1759	1818	0.0003	-11.7027	0	187938	0	45	0	3.5
CG1618	ribG	986	987	0	0	4120	4236	0.0001	-13.2877	0	454020	0	72	0	3.6
CG1619	rpe	659	660	0	0	85	115	0.005	-7.64386	0.00401028	215490	0	7	0	0.5
CG162	cgp0188	908	905	173	0	3226	2777	0.029	-5.1078	0	383287	1	60	0.1	3.3
CG1620	fmu	1535	1532	0	0	6175	9561	0.0001	-13.2877	0	1070102	0	140	0	4.6
CG1621	fmt	947	948	0	0	2	1	0.25	-2	0.0416051	447930	0	3	0	0.2
CG1622	def2	509	510	0	0	567	1938	0.0004	-11.2877	1e-08	122145	0	32	0	3.1
CG1623	priA	2066	2067	0	0	1	0	0.5	-1	0.158772	2135211	0	1	0	0
CG1624	metK	1223	1224	0	0	1	8	0.1	-3.32193	0.078692	747864	0	2	0	0.1
CG1625	dfp	1268	1269	0	0	6	57	0.0156	-6.00231	0.041612	803277	0	3	0	0.1
CG1626	cgp1809	287	288	0	0	0	63	0.0156	-6.00231	0.0225628	40896	0	4	0	0.7
CG1627	gmk	572	573	0	0	1	21	0.0435	-4.52284	0.0787402	163592	0	2	0	0.2
CG1628	ihf	320	321	0	0	0	1	0.5	-1	0.15941	51360	0	1	0	0.2
CG1629	pyrF	836	837	0	0	3	449	0.0022	-8.82828	0.0226856	348610	0	4	0	0.2
CG163	cgp0191	431	432	0	0	1971	1809	0.0003	-11.7027	0	85968	0	34	0	3.9
CG1630	carB	3341	3342	0	0	177	22	0.005	-7.64386	0.00077725	5567772	0	10	0	0.1
CG1631	carA	1181	1182	0	0	117	78	0.0051	-7.61529	0.00710843	695016	0	6	0	0.3
CG1632	pyrC	1343	1344	0	0	18	1	0.05	-4.32193	0.0416131	901152	0	3	0	0.1
CG1633	pyrB	938	939	0	0	1	361	0.0028	-8.48036	0.00402957	437574	0	7	0	0.4
CG1634	pyrR	578	579	0	0	527	260	0.0013	-9.58727	0.00075161	164726	0	10	0	0.9
CG1635	cgp1819	1526	1527	0	0	112	214	0.0031	-8.33352	0.00044709	1157466	0	11	0	0.4
CG1636	cgp1821	479	480	0	0	469	747	0.0008	-10.2877	9.34e-06	110880	0	18	0	1.9
CG1637	cgp1822	464	454	0	0	1064	560	0.0006	-10.7027	5.36e-06	98745	0	20	0	2.2
CG1638	cgp1823	188	189	0	0	219	132	0.0028	-8.48036	0.0123654	17388	0	5	0	1.3
CG1639	nusB	683	684	0	0	239	1756	0.0005	-10.9658	6.7e-07	226062	0	23	0	1.7
CG164	cgp0192	623	624	0	0	2393	3154	0.0002	-12.2877	0	182832	0	38	0	3
CG1640	efp	563	564	0	173	107	451	0.3113	-1.68362	7.464e-05	154544	1	17	0.1	1.5
CG1641	pepQ	1091	1092	173	0	3105	3117	0.028	-5.15843	0	561310	1	65	0	3
CG1642	aroB	1097	1098	0	0	61	8	0.0143	-6.12784	0.0126203	600057	0	5	0	0.2
CG1643	aroK	557	558	0	0	447	264	0.0014	-9.48036	0.0226534	154566	0	4	0	0.4
CG1644	aroC	1223	1224	0	0	1	2	0.25	-2	0.078692	747864	0	2	0	0.1
CG1645	cgp1830	413	414	0	0	673	758	0.0007	-10.4804	1.76e-06	81351	0	21	0	2.5
CG1646	cgp1831	305	306	0	0	963	986	0.0005	-10.9658	6e-08	42687	0	27	0	4.4
CG1647	cgp1832	1076	1077	0	520	3754	2889	0.0784	-3.673	0	549835	1	59	0	2.7
CG1648	cgp1833	959	956	0	0	3615	1981	0.0002	-12.2877	0	427810	0	61	0	3.2
CG1649	cgp1834	755	756	0	694	2668	3008	0.1224	-3.03032	0	269912	1	43	0.1	2.8
CG165	pepO	1928	1929	347	0	4614	4685	0.0374	-4.74082	0	1767974	1	101	0	2.6
CG1650	aroE3	830	831	0	0	144	450	0.0017	-9.20025	0.0126032	343203	0	5	0	0.3
CG1651	cgp1836	1169	1166	0	173	1184	295	0.1176	-3.08804	8e-08	662885	1	30	0	1.3
CG1652	cgp1837	548	549	0	0	0	158	0.0063	-7.31043	0.0787442	150152	0	2	0	0.2
CG1653	alaS	2666	2667	0	173	0	156	1.1083	0.148348	0.0512513	3551113	1	5	0	0.1
CG1654	cgp1839	1379	1380	0	0	5379	5842	0.0001	-13.2877	0	883890	0	103	0	3.7
CG1655	cgp1840	1199	1200	0	0	2911	2038	0.0002	-12.2877	0	684000	0	61	0	2.5
CG1656	aspS	1826	1827	0	0	195	15	0.0047	-7.73312	0.0126416	1664397	0	5	0	0.1
CG1657	cgp1842	893	894	0	0	2437	1435	0.0003	-11.7027	0	379950	0	45	0	2.5
CG1658	cgp1843	2660	2661	0	2081	11203	8468	0.1058	-3.24059	0	3287761	1	194	0	3.6
CG1659	cgp1844	1859	1859	173	0	7674	7485	0.0115	-6.44222	0	1605283	1	135	0	3.6
CG166	cgp0194	743	744	0	0	2831	1818	0.0002	-12.2877	0	255936	0	56	0	3.8
CG1660	cgp1845	650	651	0	0	1439	2447	0.0003	-11.7027	0	199206	0	40	0	3.1
CG1661	cgp1846	596	580	0	0	1590	2346	0.0003	-11.7027	0	154860	0	47	0	4.1
CG1662	cgp1847	716	717	0	0	1869	3927	0.0002	-12.2877	0	238402	0	55	0	3.8
CG1663	cgp1848	1115	1116	0	0	2365	3718	0.0002	-12.2877	0	587016	0	64	0	2.9
CG1664	cgp1849	128	129	0	0	1026	488	0.0007	-10.4804	0.00020228	7546.5	0	12	0	4.7
CG1665	cgp1850	497	498	0	0	1245	2582	0.0003	-11.7027	0	112299	0	48	0	4.8
CG1666	cgp1852	1349	1346	0	0	5569	2825	0.0001	-13.2877	0	850672	0	84	0	3.1
CG1667	glpD	1688	1689	0	173	6893	6665	0.0128	-6.28771	0	1321680	1	126	0	3.7
CG1668	hisS	1289	1290	0	0	0	1	0.5	-1	0.158843	831405	0	1	0	0
CG1669	cgp1856	641	642	173	0	1941	2540	0.0388	-4.6878	0	193258	1	43	0.1	3.3
CG167	cgp0195	965	962	0	0	2792	3130	0.0002	-12.2877	0	431457	0	65	0	3.4
CG1670	ppiB	842	843	0	173	1111	1574	0.0648	-3.94786	0	335115	1	49	0.1	2.9
CG1671	cgp1859	557	558	173	0	2005	3	0.0866	-3.52949	1.72e-06	149274	1	24	0.1	2.2
CG1672	cgp1860	275	276	0	0	400	184	0.0017	-9.20025	0.00221932	36984	0	8	0	1.4
CG1673	cgp1861	2282	2283	0	0	3147	4555	0.0001	-13.2877	0	2.50331e+06	0	93	0	2
CG1674	apt	557	558	0	0	521	1173	0.0006	-10.7027	2e-08	147591	0	31	0	2.8
CG1675	dciAE	1601	1602	0	0	4905	3873	0.0001	-13.2877	0	1207908	0	95	0	3
CG1676	secF	1211	1212	0	0	1958	1968	0.0003	-11.7027	0	701142	0	56	0	2.3
CG1677	secD	1913	1914	0	0	2559	4356	0.0001	-13.2877	0	1741740	0	95	0	2.5
CG1678	secN	365	366	0	694	1502	435	0.3586	-1.47955	4.134e-05	63876	1	18	0.1	2.5
CG1679	cgp1869	1091	1092	0	0	76	156	0.0043	-7.86145	8.751e-05	588588	0	14	0	0.6
CG168	iolR	761	762	0	0	1510	870	0.0004	-11.2877	0	276606	0	36	0	2.4
CG1680	ruvA	620	621	0	0	237	104	0.0029	-8.42973	0.00043495	189405	0	11	0	0.9
CG1681	ruvC	665	666	0	0	200	344	0.0018	-9.11779	2.882e-05	216450	0	16	0	1.2
CG1682	cgp1872	755	756	0	0	101	225	0.0031	-8.33352	0.0415983	284634	0	4	0	0.3
CG1683	tesB2	848	849	520	0	2712	2180	0.1065	-3.23107	0	344711	1	38	0.1	2.2
CG1684	cgp1874	476	477	0	0	981	1681	0.0004	-11.2877	3.14e-06	108994	0	21	0	2.2
CG1685	cgp1875	464	465	0	0	324	156	0.0021	-8.89539	0.00398312	106485	0	7	0	0.8
CG1686	cgp1876	1085	1082	0	0	1	0	0.5	-1	0.158879	584821	0	1	0	0
CG1687	cgp1877	965	966	0	0	1620	2264	0.0003	-11.7027	0	440013	0	55	0	2.8
CG1688	pgsA1	659	659	0	0	0	116	0.0085	-6.87832	0.0787284	216482	0	2	0	0.2
CG1689	cgp1879	638	639	0	0	1555	2714	0.0002	-12.2877	0	191700	0	40	0	3.1
CG169	iolC	956	957	0	0	3221	3125	0.0002	-12.2877	0	428258	0	62	0	3.2
CG1690	thrS	2102	2103	0	0	83	115	0.005	-7.64386	0.04162	2208150	0	3	0	0.1
CG1691	cgp1881	1208	1209	0	0	348	401	0.0013	-9.58727	5.137e-05	721773	0	15	0	0.6
CG1692	cgp1883	548	549	0	0	452	459	0.0011	-9.82828	2.824e-05	146308	0	16	0	1.5
CG1693	cgp1884	614	615	0	0	7	2	0.1	-3.32193	0.078734	188498	0	2	0	0.2
CG1694	cgpt5035	75	76	0	0	0	0	1	0		2888	0	0	0	0
CG1695	cgpt5036	74	75	0	0	0	0	1	0		2812.5	0	0	0	0
CG1696	cgpt5037	70	71	0	0	0	0	1	0		2520.5	0	0	0	0
CG1697	cgpt5038	72	73	0	0	0	0	1	0		2664.5	0	0	0	0
CG1698	cgpt5039	74	75	0	0	0	0	1	0		2812.5	0	0	0	0
CG1699	cgpt5040	72	73	0	0	0	0	1	0		2664.5	0	0	0	0
CG17	cgp0018	1037	1038	0	0	2925	3634	0.0002	-12.2877	0	514329	0	49	0	2.4
CG170	cgp0198	923	924	347	0	637	992	0.2135	-2.22769	0	408428	1	41	0.1	2.2
CG1700	cgp2072	308	309	0	0	872	352	0.0008	-10.2877	7.826e-05	45577.5	0	15	0	2.4
CG1701	cgp2073	359	360	0	0	777	897	0.0006	-10.7027	1.69e-06	61020	0	21	0	2.9
CG1702	cgp2074	347	348	0	0	200	838	0.001	-9.96578	7.965e-05	58116	0	14	0	2
CG1703	cgp2075	338	339	0	173	571	751	0.1315	-2.92687	0.00020884	55094	1	15	0.1	2.2
CG1704	ribD	698	699	0	0	1247	1917	0.0003	-11.7027	2e-08	233816	0	30	0	2.1
CG1705	cgp2077	1256	1257	0	173	662	624	0.1352	-2.88683	1.93e-06	775580	1	24	0	1
CG1706	cgp2078	410	407	0	0	365	1332	0.0006	-10.7027	1.1e-07	77533.5	0	26	0	3.2
CG1707	cgp2079	698	699	0	0	0	0	1	0		244300	0	0	0	0
CG1708	cgp2080	617	618	0	0	473	245	0.0014	-9.48036	5.66e-06	185091	0	19	0	1.5
CG1709	rnd	1211	1212	0	0	4084	2537	0.0002	-12.2877	0	693264	0	68	0	2.8
CG171	iolA	1514	1515	0	0	4011	4844	0.0001	-13.2877	0	1071105	0	102	0	3.4
CG1710	dxs	1910	1911	0	0	2	1	0.25	-2	0.0416188	1823094	0	3	0	0.1
CG1711	cgp2084	1238	1239	347	0	4827	4412	0.0377	-4.72929	0	705038	1	107	0	4.3
CG1712	cgp2085	863	864	0	0	1976	1942	0.0003	-11.7027	0	353376	0	47	0	2.7
CG1713	dut	449	450	0	0	0	1	0.5	-1	0.159194	101025	0	1	0	0.1
CG1714	cgp2087	551	552	0	0	195	0	0.0051	-7.61529	0.0787437	151800	0	2	0	0.2
CG1715	cgp2088	209	210	0	0	330	529	0.0012	-9.70275	0.00012789	20685	0	13	0	3.1
CG1716	cgp2089	293	294	0	173	600	1580	0.0798	-3.64747	7.42e-06	40284.5	1	21	0.2	3.6
CG1717	suhB	842	843	0	0	2626	2705	0.0002	-12.2877	0	333406	0	53	0	3.1
CG1718	ppgK	752	753	0	0	2161	828	0.0003	-11.7027	0	271080	0	33	0	2.2
CG1719	sigA	1484	1485	0	0	0	9	0.1	-3.32193	0.158818	1101870	0	1	0	0
CG172	iolB	890	891	0	0	4316	3111	0.0001	-13.2877	0	358628	0	89	0	5
CG1720	cgp2093	167	168	0	0	0	0	1	0		14112	0	0	0	0
CG1721	cgp2094	104	105	0	0	83	129	0.0047	-7.73312	0.0413864	5355	0	3	0	1.4
CG1722	cgp2095	1406	1407	0	0	3666	3362	0.0001	-13.2877	0	939172	0	73	0	2.6
CG1723	cgp2096	539	540	0	0	840	1197	0.0005	-10.9658	2e-08	137970	0	29	0	2.7
CG1724	cgp2097	1712	1713	0	0	74	121	0.0051	-7.61529	0.00712221	1.46205e+06	0	6	0	0.2
CG1725	cgp2098	239	236	0	0	160	720	0.0011	-9.82828	7.452e-05	26196	0	14	0	3
CG1726	cgp2099	497	484	0	0	942	594	0.0007	-10.4804	9.36e-06	112772	0	18	0	1.9
CG1727	cgp2100	1535	1536	0	0	5786	8032	0.0001	-13.2877	0	1095936	0	110	0	3.6
CG1728	cgp2101	434	435	0	0	1608	1818	0.0003	-11.7027	1e-08	88087.5	0	30	0	3.4
CG1729	sigB	995	996	0	0	1491	267	0.0006	-10.7027	0	473598	0	45	0	2.3
CG173	iolD	1913	1914	0	173	9578	6903	0.0106	-6.55979	0	1700630	1	140	0	3.7
CG1730	dtxR	686	687	0	0	1807	1659	0.0003	-11.7027	0	221901	0	42	0	3.1
CG1731	galE	989	990	0	0	3497	1594	0.0002	-12.2877	0	460845	0	61	0	3.1
CG1732	cgp2105	1133	1130	0	0	1809	2729	0.0002	-12.2877	0	607940	0	56	0	2.5
CG1733	cgp2106	959	960	0	0	1725	3155	0.0002	-12.2877	0	437760	0	50	0	2.6
CG1734	cgp2107	2540	2541	0	1040	4472	3949	0.1236	-3.01625	0	3070861	1	130	0	2.6
CG1735	oxyR	983	984	0	0	881	373	0.0008	-10.2877	3e-08	469860	0	30	0	1.5
CG1736	cgp2110	1091	1092	0	0	1970	3518	0.0002	-12.2877	0	564018	0	61	0	2.8
CG1737	cgp2111	3908	3909	173	0	7632	5695	0.0131	-6.25429	0	7266911	1	197	0	2.5
CG1738	nrdR	452	453	0	347	719	452	0.2969	-1.75195	7.278e-05	98988	1	17	0.1	1.9
CG1739	cgp2113	422	423	0	0	534	588	0.0009	-10.1178	9.13e-06	85657.5	0	18	0	2.1
CG174	iolE	956	957	347	0	4145	4295	0.0412	-4.60121	0	417768	1	87	0.1	4.5
CG1740	lexA	761	762	0	0	763	83	0.0012	-9.70275	0.00075899	286512	0	10	0	0.7
CG1741	sugR	779	780	0	0	63	39	0.0097	-6.6878	0.0787162	303420	0	2	0	0.1
CG1742	cgp2116	962	959	0	0	3583	1818	0.0002	-12.2877	0	436824	0	50	0	2.6
CG1743	ptsI	1706	1707	0	0	389	992	0.0007	-10.4804	5e-08	1.43303e+06	0	28	0	0.8
CG1744	cgp2118	794	795	347	0	1836	2898	0.0735	-3.76611	0	300527	1	42	0.1	2.6
CG1745	fruK	992	985	173	173	755	838	0.2177	-2.19959	7e-08	469874	2	33	0.1	1.7
CG1746	ptsF	2066	2067	173	0	1528	1556	0.0564	-4.14816	0	2072197	1	66	0	1.6
CG1747	ptsH	269	270	0	0	94	3	0.0102	-6.61529	0.0415369	36045	0	4	0	0.7
CG1748	cgp2124	527	528	0	0	770	1733	0.0004	-11.2877	0	126192	0	52	0	4.9
CG1749	uraA	1283	1284	0	0	3994	3383	0.0001	-13.2877	0	774894	0	83	0	3.2
CG175	iolG	1013	1014	0	0	3004	3615	0.0002	-12.2877	0	479622	0	74	0	3.6
CG1750	cgp2126	1460	1461	0	0	3883	3575	0.0001	-13.2877	0	997132	0	97	0	3.3
CG1751	cgp2127	758	759	0	0	149	105	0.0039	-8.00231	0.022679	286522	0	4	0	0.3
CG1752	cgp2128	539	536	0	0	885	1903	0.0004	-11.2877	1.2e-07	136680	0	27	0	2.5
CG1753	cgp2129	833	834	0	0	0	151	0.0066	-7.24332	0.0787118	346944	0	2	0	0.1
CG1754	miaA	905	906	0	173	278	142	0.4133	-1.27474	0.00976711	407251	1	8	0.1	0.4
CG1755	cgp2131	611	612	0	0	765	2171	0.0003	-11.7027	0	175032	0	42	0	3.4
CG1756	cgp2132	1361	1362	0	0	3012	4237	0.0001	-13.2877	0	869637	0	85	0	3.1
CG1757	cgp2133	1025	1026	0	0	3599	2889	0.0002	-12.2877	0	492993	0	65	0	3.2
CG1758	cgp2134	671	672	0	173	483	452	0.1859	-2.4274	4.418e-05	220088	1	18	0.1	1.3
CG1759	cgp2135	1580	1581	0	0	3759	4330	0.0001	-13.2877	0	1165197	0	107	0	3.4
CG176	iolH	878	879	0	0	1753	2792	0.0002	-12.2877	0	359950	0	60	0	3.4
CG1760	cgp2136	752	753	0	0	2239	1401	0.0003	-11.7027	1e-08	271833	0	31	0	2.1
CG1761	gluB	887	888	0	0	2805	2634	0.0002	-12.2877	0	365856	0	64	0	3.6
CG1762	gluC	686	687	0	0	2822	1620	0.0002	-12.2877	0	223275	0	37	0	2.7
CG1763	gluD	947	947	173	347	2647	2160	0.1084	-3.20556	0	424295	2	55	0.1	2.9
CG1764	recX	647	648	0	0	943	742	0.0006	-10.7027	1.94e-06	203148	0	22	0	1.7
CG1765	recA	1130	1131	0	0	99	433	0.0019	-9.03978	8.764e-05	631664	0	14	0	0.6
CG1766	cgp2145	215	216	0	0	311	940	0.0008	-10.2877	0.00070145	22248	0	11	0	2.5
CG1767	cgp2146	680	681	0	0	1260	1214	0.0004	-11.2877	0	219622	0	37	0	2.7
CG1768	cgp2147	605	606	0	0	60	20	0.0123	-6.3452	0.0125771	182103	0	5	0	0.4
CG1769	cgp2148	701	702	0	0	1	18	0.05	-4.32193	0.0787236	245700	0	2	0	0.1
CG177	iolP	1376	1377	0	0	4261	4124	0.0001	-13.2877	0	884722	0	93	0	3.4
CG1770	cgp2149	611	608	520	0	0	1	260.5	8.02514	0.5	184832	1	1	0.1	0.1
CG1771	cgp2151	830	831	0	173	863	1658	0.069	-3.85726	0	330752	1	36	0.1	2.2
CG1772	clgR	323	324	0	0	95	52	0.0068	-7.20025	0.0788099	52164	0	2	0	0.3
CG1773	cgp2153	518	519	0	0	1231	1077	0.0004	-11.2877	3.6e-07	128452	0	24	0	2.3
CG1774	pgsA2	605	606	0	0	232	223	0.0022	-8.82828	0.0040045	181497	0	7	0	0.6
CG1775	cgp2155	287	288	0	0	628	193	0.0012	-9.70275	0.00013501	39600	0	13	0	2.3
CG1776	cgp2156	119	120	0	0	200	0	0.005	-7.64386	0.0223005	6960	0	4	0	1.7
CG1777	terC	1109	1110	0	0	550	501	0.001	-9.96578	0.00044394	609945	0	11	0	0.5
CG1778	ftsK	3032	3033	173	0	282	465	0.2326	-2.10408	0.00023001	4578321	1	15	0	0.2
CG1779	cgp2159	635	636	0	0	500	1292	0.0006	-10.7027	1.3e-07	193980	0	26	0	2
CG178	cgp0207	1025	1026	0	0	4454	2757	0.0001	-13.2877	0	492480	0	69	0	3.4
CG1780	cgp2160	2156	2157	0	0	526	322	0.0012	-9.70275	8.942e-05	2.31123e+06	0	14	0	0.3
CG1781	dapA	905	906	0	0	0	1	0.5	-1	0.158922	409965	0	1	0	0.1
CG1782	thyX	752	753	0	0	1836	1380	0.0003	-11.7027	1e-08	271833	0	32	0	2.1
CG1783	dapB	746	747	0	0	706	95	0.0012	-9.70275	0.0125953	277137	0	5	0	0.3
CG1784	cgp2165	701	702	0	0	1883	1045	0.0003	-11.7027	0	232362	0	42	0	3
CG1785	gpsI	2261	2262	0	0	187	791	0.001	-9.96578	3.71e-06	2535702	0	21	0	0.5
CG1786	cgp2167	269	270	0	0	0	0	1	0		36450	0	0	0	0
CG1787	iunH2	950	951	0	0	3953	4604	0.0001	-13.2877	0	410356	0	89	0	4.7
CG1788	ribF	1025	1026	0	0	3	23	0.037	-4.75633	0.00710165	523260	0	6	0	0.3
CG1789	truB	893	894	0	0	1795	1584	0.0003	-11.7027	0	377715	0	49	0	2.7
CG179	cgp0208	458	459	0	0	2670	1479	0.0002	-12.2877	0	95701.5	0	42	0	4.6
CG1790	pptA	653	643	520	9538	6	347	28.4153	4.8286	0.49758	206730	4	4	0.3	0.3
CG1791	cgp2172	806	807	80290	93815	923	718	106.033	6.72837	0.0244249	320906	12	24	0.7	1.5
CG1792	dinF	1313	1300	0	0	3751	3009	0.0001	-13.2877	0	798850	0	72	0	2.8
CG1793	cgp2174	998	999	347	347	1123	2542	0.1896	-2.39897	0	474078	2	53	0.1	2.7
CG1794	rbfA	449	450	0	0	194	122	0.0032	-8.28771	0.0125438	100125	0	5	0	0.6
CG1795	cgp2176	3014	3015	0	0	0	101	0.0098	-6.673	0.0416237	4540590	0	3	0	0
CG1796	cgp2177	338	339	0	0	550	38	0.0017	-9.20025	0.00073016	55765.5	0	10	0	1.5
CG1797	nusA	998	999	0	0	2	0	0.3333	-1.58511	0.0787015	498002	0	2	0	0.1
CG1798	cgp2179	536	537	0	0	199	287	0.0021	-8.89539	0.00130371	141768	0	9	0	0.8
CG1799	cgp2180	818	819	0	0	2801	3544	0.0002	-12.2877	0	310810	0	62	0	3.8
CG18	cgp0019	896	897	0	0	2856	2600	0.0002	-12.2877	0	376292	0	58	0	3.2
CG180	cgp0209	347	348	0	0	557	842	0.0007	-10.4804	2.641e-05	57768	0	16	0	2.3
CG1800	cgp2181	1604	1605	0	693	4556	5562	0.0686	-3.86565	0	1203836	2	109	0.1	3.4
CG1801	cgp2182	926	919	0	0	2012	2337	0.0002	-12.2877	0	396548	0	58	0	3.2
CG1802	cgp2183	1034	1031	0	0	2629	5083	0.0001	-13.2877	0	500035	0	63	0	3.1
CG1803	cgp2184	1733	1734	0	0	5854	4444	0.0001	-13.2877	0	1401072	0	120	0	3.5
CG1804	proS	1766	1767	0	0	1	33	0.0286	-5.12784	0.0126405	1556727	0	5	0	0.1
CG1805	cgp2186	737	734	0	0	2164	2016	0.0002	-12.2877	0	252863	0	45	0	3.1
CG1806	cgp2187	761	762	0	0	2155	2117	0.0002	-12.2877	0	273939	0	44	0	2.9
CG1807	cgp2188	1103	1104	173	0	3000	3174	0.0282	-5.14816	0	574653	1	65	0	2.9
CG1808	cysG	752	753	0	0	46	260	0.0033	-8.24332	0.0226784	281998	0	4	0	0.3
CG1809	cgp2190	1424	1425	173	0	4235	3710	0.0219	-5.51293	0	951932	1	91	0	3.2
CG181	cgp0210	995	996	0	0	2460	3066	0.0002	-12.2877	0	466626	0	60	0	3
CG1810	cgp2191	902	903	0	0	707	1771	0.0004	-11.2877	2e-08	394160	0	31	0	1.7
CG1811	mqo	1502	1503	0	0	801	971	0.0006	-10.7027	0	1.09343e+06	0	48	0	1.6
CG1812	cgp2193	1025	1026	0	0	4262	5149	0.0001	-13.2877	0	478629	0	95	0	4.6
CG1813	mtr	1397	1398	2948	0	5270	2850	0.3631	-1.46156	0	915066	2	92	0.1	3.3
CG1814	cgp2195	476	477	0	0	752	488	0.0008	-10.2877	1.609e-05	109710	0	17	0	1.8
CG1815	cgp2196	359	360	0	0	309	0	0.0032	-8.28771	0.00700735	63720	0	6	0	0.8
CG1816	cgp2197	731	728	0	0	1285	907	0.0005	-10.9658	3e-08	254436	0	29	0	2
CG1817	map2	875	876	0	0	0	0	1	0		383688	0	0	0	0
CG1818	pbp	1868	1869	0	346	5661	7847	0.0257	-5.28209	0	1.64384e+06	2	115	0.1	3.1
CG1819	cgp2200	632	629	0	0	1601	1509	0.0003	-11.7027	0	185240	0	41	0	3.3
CG182	cgp0211	1235	1236	0	0	3777	4441	0.0001	-13.2877	0	719352	0	73	0	3
CG1820	cgp2201	1133	1134	0	0	953	2015	0.0003	-11.7027	0	619164	0	42	0	1.9
CG1821	cgp2202	959	960	0	0	2701	2244	0.0002	-12.2877	0	433440	0	57	0	3
CG1822	cgp2204	692	693	0	0	699	1064	0.0006	-10.7027	8e-08	230769	0	27	0	1.9
CG1823	ispG	1211	1212	0	0	1	311	0.0032	-8.28771	0.0126254	731442	0	5	0	0.2
CG1824	cgp2207	1214	1215	347	0	2357	2506	0.0715	-3.80591	0	707153	1	52	0	2.1
CG1825	dxr	1169	1170	0	0	2	0	0.3333	-1.58511	0.0786939	683280	0	2	0	0.1
CG1826	cgp2211	443	444	0	0	737	320	0.0009	-10.1178	1.591e-05	94794	0	18	0	2
CG1827	cgp2212	1580	1581	0	0	2462	2730	0.0002	-12.2877	0	1190493	0	76	0	2.4
CG1828	cgp2213	857	858	0	0	1415	1709	0.0003	-11.7027	1e-08	354354	0	32	0	1.9
CG1829	cgp2214	1100	1101	520	0	3587	6641	0.0509	-4.29619	0	561000	1	83	0	3.8
CG183	cgp0212	1013	1014	0	0	2513	2775	0.0002	-12.2877	0	492297	0	43	0	2.1
CG1830	cgp2215	500	501	0	0	1548	618	0.0005	-10.9658	7e-08	118737	0	27	0	2.7
CG1831	cdsA	893	894	0	0	0	116	0.0085	-6.87832	0.158926	399171	0	1	0	0.1
CG1832	frr	557	558	0	0	0	3	0.25	-2	0.0787427	155124	0	2	0	0.2
CG1833	pyrH	731	732	0	0	9	69	0.0127	-6.29903	0.0125937	266082	0	5	0	0.3
CG1834	tsf	827	828	0	0	0	260	0.0038	-8.03978	0.0416012	341550	0	3	0	0.2
CG1835	rpsB	818	819	0	0	1	0	0.5	-1	0.158951	334971	0	1	0	0.1
CG1836	cgp2223	482	483	0	0	2704	1388	0.0002	-12.2877	0	107226	0	40	0	4.1
CG1837	xerC	947	944	0	0	411	18	0.0023	-8.76415	0.00230347	441792	0	8	0	0.4
CG1838	cgp2226	1184	1185	0	0	4077	2883	0.0001	-13.2877	0	663600	0	65	0	2.7
CG1839	cgp2227	1523	1520	173	0	5506	3668	0.019	-5.71786	0	1089104	1	89	0	2.9
CG184	cgp0214	431	432	0	0	536	1286	0.0005	-10.9658	3.4e-07	88128	0	24	0	2.8
CG1840	cgp2228	368	355	0	0	388	153	0.0018	-9.11779	0.00128047	61415	0	9	0	1.3
CG1841	cgp2229	305	302	0	0	722	388	0.0009	-10.1178	0.00072391	44092	0	10	0	1.7
CG1842	rnhB	668	669	0	0	1371	1109	0.0004	-11.2877	6.6e-07	216087	0	23	0	1.7
CG1843	lepB	788	789	0	0	2	0	0.3333	-1.58511	0.158962	310866	0	1	0	0.1
CG1844	cgp2234	944	945	0	0	1097	262	0.0007	-10.4804	1.4e-07	434228	0	26	0	1.4
CG1845	rplS	341	342	0	0	0	1	0.5	-1	0.159364	58311	0	1	0	0.1
CG1846	thiE	665	662	0	0	1643	1606	0.0003	-11.7027	0	203896	0	46	0	3.5
CG1847	thiO	1124	1125	0	0	3317	2933	0.0002	-12.2877	0	595688	0	66	0	2.9
CG1848	thiS	197	198	0	0	488	233	0.0014	-9.48036	0.00022293	18414	0	12	0	3
CG1849	thiG	782	783	694	346	1968	2377	0.2395	-2.0619	0	290545	3	45	0.2	2.9
CG185	cspA	203	204	0	0	1001	151	0.0009	-10.1178	0.00039506	19686	0	11	0	2.7
CG1850	thiF	1076	1077	0	0	1988	2787	0.0002	-12.2877	0	554655	0	47	0	2.2
CG1851	tex	2276	2277	173	173	4839	3207	0.0431	-4.53617	0	2488821	2	94	0	2.1
CG1852	cgp2242	977	978	0	0	1706	2792	0.0002	-12.2877	0	453792	0	51	0	2.6
CG1853	cgp2243	1331	1332	0	0	3253	4159	0.0001	-13.2877	0	836496	0	76	0	2.9
CG1854	cgp2244	1253	1254	2254	0	3490	3379	0.3282	-1.60735	0	739898	1	75	0	3
CG1855	cgp2247	371	372	0	0	541	472	0.001	-9.96578	4.633e-05	66402	0	15	0	2
CG1856	cgp2248	692	693	0	0	625	1186	0.0006	-10.7027	1.3e-07	231116	0	26	0	1.9
CG1857	trmD	869	866	0	173	27	6	5.1176	2.35547	0.0900241	373681	1	4	0.1	0.2
CG1858	cgp2250	650	651	0	0	2396	2060	0.0002	-12.2877	2e-08	202136	0	30	0	2.3
CG1859	rimM	515	512	0	0	0	39	0.025	-5.32193	0.078751	130560	0	2	0	0.2
CG186	cgp0216	536	537	0	0	1081	449	0.0007	-10.4804	9.51e-06	139352	0	18	0	1.7
CG1860	cgp2252	350	351	0	0	450	735	0.0008	-10.2877	9.6e-07	57739.5	0	22	0	3.1
CG1861	rpsP	497	498	0	0	0	231	0.0043	-7.86145	0.0226418	123006	0	4	0	0.4
CG1862	cgp2254	476	477	0	0	2506	1967	0.0002	-12.2877	0	103748	0	43	0	4.5
CG1863	cgp2255	869	866	0	0	491	952	0.0007	-10.4804	3.45e-06	366318	0	20	0	1.2
CG1864	cgp2256	878	879	0	0	2319	1930	0.0002	-12.2877	0	366982	0	45	0	2.6
CG1865	srp	1643	1644	0	0	58	16	0.0133	-6.23243	0.012638	1347258	0	5	0	0.2
CG1866	glnD	2078	2079	173	0	9459	7396	0.0103	-6.60121	0	2040566	1	118	0	2.8
CG1867	glnK	338	339	0	0	1628	1812	0.0003	-11.7027	2e-08	52545	0	32	0	4.7
CG1868	amtB	1316	1317	0	0	3025	3549	0.0002	-12.2877	0	825759	0	64	0	2.4
CG1869	cgp2262	1730	1731	0	0	2	1	0.25	-2	0.0416174	1495584	0	3	0	0.1
CG187	cgp0217	308	305	0	0	633	480	0.0009	-10.1178	0.00041437	44835	0	11	0	1.8
CG1870	cgp2263	3374	3375	173	0	5018	5149	0.0171	-5.86986	0	5405133	1	176	0	2.6
CG1871	cgp2265	3467	3468	0	347	4221	6719	0.0318	-4.97483	0	5.76042e+06	1	151	0	2.2
CG1872	cgp2266	284	285	0	0	984	553	0.0007	-10.4804	4.76e-06	37905	0	19	0	3.3
CG1873	cgp2267	1838	1839	0	0	3415	4679	0.0001	-13.2877	0	1594413	0	105	0	2.9
CG1874	cgp2268	860	861	694	173	2227	1715	0.2201	-2.18377	0	351328	2	47	0.1	2.7
CG1875	cgp2269	809	810	0	0	1663	2812	0.0002	-12.2877	0	311040	0	42	0	2.6
CG1876	cgp2270	449	450	0	0	806	1567	0.0004	-11.2877	3.1e-06	96750	0	20	0	2.2
CG1877	cgp2271	617	618	0	0	989	1319	0.0004	-11.2877	6.5e-07	183855	0	24	0	1.9
CG1878	mutM1	833	834	0	0	1146	1951	0.0003	-11.7027	0	326511	0	52	0	3.1
CG1879	rnc	743	740	0	0	303	444	0.0013	-9.58727	5.79e-06	266770	0	19	0	1.3
CG188	cgp0218	416	417	0	0	242	288	0.0019	-9.03978	0.00073978	84859.5	0	10	0	1.2
CG1880	cgp2274	536	537	0	0	323	269	0.0017	-9.20025	8.363e-05	140426	0	14	0	1.3
CG1881	cgp2275	791	792	0	0	1387	832	0.0005	-10.9658	1.17e-06	304920	0	22	0	1.4
CG1882	cgp2277	1625	1626	0	0	4098	3633	0.0001	-13.2877	0	1255272	0	82	0	2.5
CG1883	cgp2279	1532	1529	0	0	6596	6172	0.0001	-13.2877	0	1.08024e+06	0	119	0	3.9
CG1884	gdh	1343	1344	0	173	463	3085	0.049	-4.35107	0	871602	1	49	0	1.8
CG1885	glxK	1124	1121	0	0	2052	2163	0.0002	-12.2877	0	598054	0	56	0	2.5
CG1886	cgp2283	398	399	0	0	315	721	0.001	-9.96578	1.562e-05	76209	0	17	0	2.1
CG1887	galT	1328	1329	0	0	3468	3629	0.0001	-13.2877	0	840592	0	64	0	2.4
CG1888	cgp2285	1265	1266	0	0	2928	1930	0.0002	-12.2877	0	761499	0	65	0	2.6
CG1889	cgp2286	338	335	173	0	436	714	0.1512	-2.72547	2.345e-05	53106	1	19	0.1	2.8
CG189	cgp0219	137	138	0	0	416	380	0.0013	-9.58727	0.00210402	8970	0	8	0	2.9
CG1890	cgp2287	116	117	0	0	349	27	0.0027	-8.53282	0.00671008	6493.5	0	6	0	2.6
CG1891	cgp2288	278	279	0	0	361	496	0.0012	-9.70275	0.00071919	37525.5	0	10	0	1.8
CG1892	glgP2	2552	2553	520	173	8455	7832	0.0426	-4.553	0	3057396	3	164	0.1	3.2
CG1893	cgp2290	902	903	0	173	3122	2723	0.0298	-5.06854	0	381535	1	60	0.1	3.3
CG1894	pyk	1427	1428	0	0	480	804	0.0008	-10.2877	0	993888	0	36	0	1.3
CG1895	lgt	950	951	0	0	311	224	0.0019	-9.03978	0.00044202	446970	0	11	0	0.6
CG1896	cgp2293	785	786	0	0	1403	1118	0.0004	-11.2877	0	295536	0	34	0	2.2
CG1897	cgp2294	659	660	0	0	0	37	0.0263	-5.24879	0.0787283	217140	0	2	0	0.2
CG1898	cgp2296	356	357	0	0	886	1983	0.0003	-11.7027	2.93e-06	60154.5	0	20	0	2.8
CG1899	hisF	776	773	0	0	1204	1207	0.0004	-11.2877	3e-08	287556	0	29	0	1.9
CG19	cgp0021	422	423	0	0	857	410	0.0008	-10.2877	9.13e-06	85657.5	0	18	0	2.1
CG190	cgp0220	428	429	0	0	46	421	0.0021	-8.89539	0.00042596	89661	0	11	0	1.3
CG1900	impA	827	828	0	0	1957	1774	0.0003	-11.7027	0	324990	0	43	0	2.6
CG1901	hisA	740	741	0	0	1100	2049	0.0003	-11.7027	0	258980	0	43	0	2.9
CG1902	hisH	635	636	0	347	4945	6783	0.0297	-5.07339	0	188589	1	45	0.1	3.5
CG1903	cgp2301	1316	1317	0	0	3158	2542	0.0002	-12.2877	0	827076	0	62	0	2.4
CG1904	cgp2302	227	228	0	0	1	303	0.0033	-8.24332	0.00388852	25194	0	7	0	1.5
CG1905	hisB	608	609	0	0	3200	3780	0.0001	-13.2877	0	172347	0	46	0	3.8
CG1906	hisC	1100	1101	0	0	2442	4951	0.0001	-13.2877	0	567566	0	73	0	3.3
CG1907	hisD	1328	1329	347	173	4596	4723	0.0559	-4.16101	0	831346	2	83	0.1	3.1
CG1908	cgp2306	1202	1203	173	0	1982	1857	0.0453	-4.46435	0	689945	1	59	0	2.5
CG1909	cgp2307	653	654	0	0	4046	1658	0.0002	-12.2877	0	201432	0	38	0	2.9
CG191	cgp0221	992	993	0	173	1578	2012	0.0485	-4.36587	0	468221	1	53	0.1	2.7
CG1910	cgp2308	644	645	2426	2426	1024	713	2.7923	1.48145	0.239688	206574	18	23	1.4	1.8
CG1911	cgp2309	563	564	0	0	1170	1008	0.0005	-10.9658	0	149742	0	34	0	3
CG1912	glgX	2510	2511	0	173	5816	4993	0.0161	-5.9568	0	2984378	1	137	0	2.7
CG1913	cgp2311	803	804	0	0	1896	2657	0.0002	-12.2877	0	303108	0	53	0	3.3
CG1914	gip	776	777	0	173	1466	1937	0.0511	-4.29053	0	284013	1	49	0.1	3.2
CG1915	idhA3	1013	1014	0	0	2892	3633	0.0002	-12.2877	0	474045	0	81	0	4
CG1916	cgp2314	998	999	867	0	2917	1919	0.1795	-2.47794	0	476070	2	49	0.1	2.5
CG1917	cgp2315	731	732	0	0	1586	1790	0.0003	-11.7027	2.3e-07	258762	0	25	0	1.7
CG1918	cgp2317	1040	1041	1040	0	1768	2335	0.2537	-1.9788	0	516361	1	50	0	2.4
CG1919	cgp2318	989	990	0	0	1891	3914	0.0002	-12.2877	0	461835	0	62	0	3.1
CG192	cgp0222	404	405	0	0	178	150	0.003	-8.38082	0.00702346	80797.5	0	6	0	0.7
CG1920	cgp2320	395	396	0	0	1956	616	0.0004	-11.2877	4e-08	72864	0	29	0	3.7
CG1921	cgp2321	1430	1431	0	173	2903	3014	0.0294	-5.08804	0	968102	1	81	0	2.8
CG1922	cgp2322	608	609	0	0	2449	2434	0.0002	-12.2877	0	170824	0	50	0	4.1
CG1923	treY	2435	2436	173	0	5300	4382	0.018	-5.79586	0	2831886	1	113	0	2.3
CG1924	cgp2324	1025	1026	0	0	3141	2937	0.0002	-12.2877	0	491967	0	69	0	3.4
CG1925	cgp2325	131	132	0	0	646	102	0.0013	-9.58727	0.00065312	8052	0	10	0	3.8
CG1926	cgp2326	374	375	0	0	1001	805	0.0006	-10.7027	3.3e-07	65812.5	0	24	0	3.2
CG1927	cgp2328	1040	1041	0	0	2349	4003	0.0002	-12.2877	0	510610	0	60	0	2.9
CG1928	cgp2329	1046	1047	347	173	4881	5856	0.0485	-4.36587	0	514119	2	69	0.1	3.3
CG1929	cgp2330	380	381	0	0	806	1635	0.0004	-11.2877	6e-08	67437	0	27	0	3.5
CG193	cgp0223	1475	1476	0	1040	1884	2379	0.2441	-2.03446	0	1.04799e+06	1	57	0	1.9
CG1930	cgp2331	233	234	0	0	712	627	0.0007	-10.4804	0.00040245	26091	0	12	0	2.6
CG1931	cgp2332	653	654	0	0	1439	1218	0.0004	-11.2877	4e-08	204702	0	28	0	2.1
CG1932	treZ	1724	1725	0	0	5419	3528	0.0001	-13.2877	0	1400700	0	103	0	3
CG1933	ilvA	1310	1311	0	0	4299	4854	0.0001	-13.2877	0	799710	0	93	0	3.5
CG1934	cgp2336	503	504	0	0	1259	1068	0.0004	-11.2877	1.2e-07	120456	0	26	0	2.6
CG1935	cgp2337	1205	1206	0	0	3844	5720	0.0001	-13.2877	0	665712	0	103	0	4.3
CG1936	dnaE1	3566	3567	0	0	2	2	0.2	-2.32193	0.022735	6.35461e+06	0	4	0	0.1
CG1937	cgp2339	842	843	0	0	1153	1022	0.0005	-10.9658	1e-08	341836	0	33	0	2
CG1938	cgp2340	470	471	0	0	762	244	0.001	-9.96578	3.13e-06	106210	0	20	0	2.1
CG1939	cgp2341	986	983	0	173	1930	2457	0.0397	-4.65472	0	460060	1	48	0.1	2.4
CG194	tnp2f	1514	1515	0	0	0	0	1	0		1.14761e+06	0	0	0	0
CG1940	cgp2342	887	888	0	0	1633	1798	0.0003	-11.7027	0	372072	0	52	0	2.9
CG1941	cgp2343	2654	2624	0	0	5349	7529	0.0001	-13.2877	0	3282624	0	124	0	2.4
CG1942	cgp2344	953	954	0	0	2118	2484	0.0002	-12.2877	0	431208	0	51	0	2.7
CG1943	cgp2345	581	582	0	1214	2016	1498	0.3457	-1.53241	1e-08	159776	1	35	0.1	3
CG1944	rluD	932	931	0	0	677	346	0.001	-9.96578	3.48e-06	424070	0	20	0	1.1
CG1945	IspA	572	573	0	0	107	301	0.0024	-8.70275	0.00130658	161586	0	10	0	0.9
CG1946	cgp2348	1004	1005	0	0	2776	3214	0.0002	-12.2877	0	469335	0	71	0	3.5
CG1947	cgp2349	1652	1653	0	0	3523	3061	0.0002	-12.2877	0	1309176	0	69	0	2.1
CG1948	cgp2350	602	603	2427	2772	857	1760	1.9862	0.990011	0.00319788	176275	14	35	1.2	2.9
CG1949	ansA	977	978	27571	23754	1717	1258	17.2466	4.10824	0.440906	477593	41	45	2.1	2.3
CG195	cgp0228	437	438	0	0	219	873	0.0009	-10.1178	0.00014184	93075	0	14	0	1.6
CG1950	cgp2353	317	236	0	0	704	307	0.001	-9.96578	4.246e-05	26078	0	15	0	3.2
CG1951	tnp2e	1514	1515	0	0	0	0	1	0		1.14761e+06	0	0	0	0
CG1952	dinP	1403	1404	0	0	3784	2210	0.0002	-12.2877	0	939276	0	67	0	2.4
CG1953	cgp2356	860	861	0	0	1846	1957	0.0003	-11.7027	0	349136	0	50	0	2.9
CG1954	cgp2357	1004	998	0	0	1227	1258	0.0004	-11.2877	0	481036	0	34	0	1.7
CG1955	cgp2358	629	630	0	0	1386	1862	0.0003	-11.7027	1e-08	188685	0	32	0	2.5
CG1956	ileS	3164	3165	0	0	1	0	0.5	-1	0.158732	5007030	0	1	0	0
CG1957	cgp2360	218	219	0	0	647	303	0.0011	-9.82828	0.00012896	22557	0	13	0	3
CG1958	cgp2361	1097	1098	0	0	230	224	0.0022	-8.82828	0.00403621	598959	0	7	0	0.3
CG1959	cgp2362	287	288	0	0	56	121	0.0056	-7.48036	0.00392703	40464	0	7	0	1.2
CG196	gltB	4532	4532	0	694	16614	15882	0.0214	-5.54625	0	9639696	1	288	0	3.2
CG1960	cgp2363	458	459	0	0	30	399	0.0023	-8.76415	0.0226326	104422	0	4	0	0.4
CG1961	cgp2364	704	705	0	0	1930	2323	0.0002	-12.2877	0	233708	0	43	0	3
CG1962	cgp2365	740	741	0	0	1844	2109	0.0003	-11.7027	0	258980	0	42	0	2.8
CG1963	ftsZ	1328	1329	0	0	3	0	0.25	-2	0.158837	882456	0	1	0	0
CG1964	ftsQ	668	669	0	0	30	0	0.0323	-4.95232	0.0787272	223112	0	2	0	0.1
CG1965	cgp2368	1460	1461	0	0	0	1	0.5	-1	0.158821	1066530	0	1	0	0
CG1966	murG	1091	1092	0	0	0	0	1	0		596232	0	0	0	0
CG1967	ftsW	1652	1653	173	0	1142	373	0.1148	-3.12281	4.636e-05	1352160	1	18	0	0.5
CG1968	murD	1418	1419	0	0	0	0	1	0		1.00678e+06	0	0	0	0
CG1969	mraY	1100	1101	0	0	215	163	0.0026	-8.58727	0.0126205	603348	0	5	0	0.2
CG197	gltD	1520	1521	0	173	3887	3093	0.0249	-5.32771	0	1095146	1	83	0	2.7
CG1970	murF	1544	1545	0	0	108	172	0.0036	-8.11779	0.0023172	1.18733e+06	0	8	0	0.3
CG1971	murE	1565	1566	0	173	0	3	43.5	5.44294	0.282163	1225396	1	2	0	0.1
CG1972	ftsI	2114	2111	0	0	177	0	0.0056	-7.48036	0.0786742	2.22605e+06	0	2	0	0
CG1973	cgp2376	797	798	0	0	622	66	0.0015	-9.38082	0.00076005	314412	0	10	0	0.6
CG1974	mraW	1013	1010	0	0	791	1529	0.0004	-11.2877	0	491365	0	37	0	1.8
CG1975	mraZ	431	432	0	0	1229	828	0.0005	-10.9658	3.07e-06	88992	0	20	0	2.3
CG1976	cgp2380	389	390	0	0	111	695	0.0012	-9.70275	0.0001402	73515	0	13	0	1.7
CG1977	cgp2381	425	426	0	0	2611	2093	0.0002	-12.2877	0	82431	0	39	0	4.6
CG1978	cgp2382	563	564	173	0	2118	1140	0.0534	-4.22702	0	147501	1	42	0.1	3.7
CG1979	metF	980	981	0	0	845	1159	0.0005	-10.9658	1e-08	465484	0	34	0	1.7
CG198	cgp0231	242	243	0	0	331	285	0.0016	-9.28771	0.00040431	28188	0	11	0	2.3
CG1980	idsA	1100	1101	0	173	1090	1023	0.0823	-3.60296	0	585748	1	39	0	1.8
CG1981	cgp2385	1529	1530	0	0	3141	3688	0.0001	-13.2877	0	1096245	0	98	0	3.2
CG1982	cgp2386	371	372	0	0	1038	537	0.0006	-10.7027	8.9e-06	65844	0	18	0	2.4
CG1983	pknL	2222	2222	1908	173	5954	6865	0.1624	-2.62238	0	2326543	2	132	0	3
CG1984	cgp2389	1238	1239	0	0	2278	2667	0.0002	-12.2877	0	723576	0	72	0	2.9
CG1985	cgp2390	1310	1311	0	173	2705	2648	0.0325	-4.94342	0	813500	1	72	0	2.7
CG1986	aroG	1388	1389	0	866	375	54	2.0163	1.01171	0.022936	959128	4	12	0.1	0.4
CG1987	cgp2392	506	507	0	0	0	20	0.0476	-4.39289	0.159133	128271	0	1	0	0.1
CG1988	cgp2393	2438	2439	0	0	6769	6535	0.0001	-13.2877	0	2775582	0	164	0	3.4
CG1989	cmt4	1451	1452	0	0	2622	3118	0.0002	-12.2877	0	1002606	0	71	0	2.4
CG199	cgp0232	158	159	0	0	435	366	0.0012	-9.70275	0.0123076	12243	0	7	0	2.2
CG1990	cgp2395	179	180	0	0	237	539	0.0013	-9.58727	0.00038749	15210	0	11	0	3.1
CG1991	cgp2397	1190	1191	0	0	1939	1651	0.0003	-11.7027	1.5e-07	693758	0	26	0	1.1
CG1992	plsC	737	738	0	0	1	130	0.0076	-7.03978	0.0415974	271215	0	3	0	0.2
CG1993	glk	971	972	0	0	50	271	0.0031	-8.33352	0.0226946	470448	0	4	0	0.2
CG1994	cgp2400	1145	1146	173	0	0	16	10.2353	3.35548	0.089983	654941	1	4	0	0.2
CG1995	cgp2401	1019	1020	0	0	2231	1420	0.0003	-11.7027	0	496740	0	46	0	2.3
CG1996	cgp2402	629	630	0	0	93	1968	0.0005	-10.9658	0	188055	0	34	0	2.7
CG1997	qcrB	1619	1620	0	0	84	138	0.0045	-7.79586	0.00712044	1307340	0	6	0	0.2
CG1998	qcrA1	1226	1219	0	0	1	1	0.3333	-1.58511	0.0786922	741762	0	2	0	0.1
CG1999	qcrC	887	888	0	0	0	0	1	0		394272	0	0	0	0
CG2	cgp0002	305	306	0	0	187	251	0.0023	-8.76415	0.00698176	45900	0	6	0	1
CG20	cgp0025	872	873	0	0	2898	2371	0.0002	-12.2877	0	356620	0	57	0	3.3
CG200	cgp0233	1487	1469	0	0	4159	3211	0.0001	-13.2877	0	1.02316e+06	0	77	0	2.6
CG2000	ctaE	617	618	0	0	0	0	1	0		190962	0	0	0	0
CG2001	cgp2408	431	432	0	0	0	1	0.5	-1	0.159216	93096	0	1	0	0.1
CG2002	ctaC	1079	1080	0	0	0	106	0.0093	-6.74855	0.158879	582660	0	1	0	0
CG2003	ltsA	1922	1923	0	0	1588	1484	0.0003	-11.7027	0	1813389	0	38	0	1
CG2004	cgp2411	344	345	0	0	0	196	0.0051	-7.61529	0.0125044	58650	0	5	0	0.7
CG2005	cgp2412	719	720	0	0	1970	1905	0.0003	-11.7027	0	242640	0	47	0	3.3
CG2006	cobU	524	525	0	0	1498	1461	0.0003	-11.7027	1.2e-07	130988	0	27	0	2.6
CG2007	cobT	1076	1077	0	0	1639	2087	0.0003	-11.7027	0	555194	0	46	0	2.1
CG2008	cobS	923	924	0	0	1574	1633	0.0003	-11.7027	0	408408	0	40	0	2.2
CG2009	cgp2416	251	252	0	0	255	614	0.0011	-9.82828	0.00040608	30366	0	11	0	2.2
CG201	emb	3473	3474	0	0	431	751	0.0008	-10.2877	5.292e-05	6008283	0	16	0	0.2
CG2010	cgp2417	716	717	0	173	2818	3274	0.0286	-5.12784	0	240924	1	46	0.1	3.2
CG2011	ilvE	1103	1104	0	173	2546	1506	0.0429	-4.54288	0	585687	1	45	0	2
CG2012	pepB	1541	1542	0	0	4517	4459	0.0001	-13.2877	0	1117179	0	93	0	3
CG2013	cgp2420	395	396	0	0	1124	699	0.0005	-10.9658	5.8e-07	73854	0	23	0	2.9
CG2014	sucB	2027	2028	0	0	11	47	0.0169	-5.88683	0.0786752	2054364	0	2	0	0
CG2015	lipB	755	756	0	0	11	2	0.0714	-3.80793	0.0787183	285012	0	2	0	0.1
CG2016	lipA	1046	1047	0	0	351	68	0.0024	-8.70275	0.0040343	544440	0	7	0	0.3
CG2017	cgp2424	782	783	0	0	33	1	0.0286	-5.12784	0.0226812	304978	0	4	0	0.3
CG2018	cgp2425	1619	1620	0	0	5038	5117	0.0001	-13.2877	0	1225530	0	107	0	3.3
CG2019	tnp2d	1514	1515	0	0	0	0	1	0		1.14761e+06	0	0	0	0
CG202	cgp0236	2033	2026	0	0	56	0	0.0175	-5.8365	0.0416196	2049299	0	3	0	0.1
CG2020	cgp2428	473	474	0	0	116	97	0.0047	-7.73312	0.00398486	110679	0	7	0	0.7
CG2021	glnA	1433	1434	0	0	0	0	1	0		1028178	0	0	0	0
CG2022	cgp2430	167	168	0	0	57	426	0.0021	-8.89539	0.00382312	13524	0	7	0	2.1
CG2023	cgp2431	401	398	0	0	897	662	0.0006	-10.7027	5.21e-06	75421	0	19	0	2.4
CG2024	cgp2432	536	537	0	0	1302	1353	0.0004	-11.2877	7e-08	136935	0	27	0	2.5
CG2025	cgp2434	908	909	0	0	1529	2910	0.0002	-12.2877	0	391779	0	48	0	2.6
CG2026	cgp2435	347	348	0	0	190	0	0.0052	-7.58727	0.0225951	59856	0	4	0	0.6
CG2027	cgp2436	92	93	0	0	196	249	0.0022	-8.82828	0.0120506	4092	0	5	0	2.7
CG2028	thrC	1445	1446	0	0	2365	3288	0.0002	-12.2877	0	997017	0	67	0	2.3
CG2029	cgp2438	218	219	0	0	1046	920	0.0005	-10.9658	7.62e-06	22009.5	0	18	0	4.1
CG203	cgp0237	761	762	0	0	283	380	0.0015	-9.38082	9.95e-06	283464	0	19	0	1.2
CG2030	cgp2440	1325	1326	0	0	5654	2888	0.0001	-13.2877	0	811512	0	102	0	3.8
CG2031	cgp2441	494	401	0	0	431	477	0.0011	-9.82828	0.00024398	77994.5	0	12	0	1.5
CG2032	cgp2442	446	447	0	0	750	397	0.0009	-10.1178	9.23e-06	95881.5	0	18	0	2
CG2033	cgp2443	407	408	347	0	629	241	0.3995	-1.32373	0.00108507	80993	1	13	0.1	1.6
CG2034	cgp2444	482	483	0	0	1250	1333	0.0004	-11.2877	2e-08	109641	0	30	0	3.1
CG2035	hmuO	647	648	0	173	1649	2215	0.045	-4.47393	0	198944	1	37	0.1	2.9
CG2036	glnE	3137	3138	0	0	4880	5520	0.0001	-13.2877	0	4708569	0	139	0	2.2
CG2037	glnA2	1340	1341	0	0	2781	1395	0.0002	-12.2877	0	855558	0	65	0	2.4
CG2038	cgp2449	1106	1107	0	347	3840	3838	0.0453	-4.46435	0	578432	1	63	0	2.8
CG2039	cgp2450	1817	1818	0	0	5434	4934	0.0001	-13.2877	0	1549845	0	114	0	3.1
CG204	cgp0238	1466	1467	0	0	58	1	0.0167	-5.90401	0.078685	1.07458e+06	0	2	0	0.1
CG2040	cgp2451	182	183	0	0	109	0	0.0091	-6.77992	0.0414915	16470	0	3	0	0.8
CG2041	galK	1295	1296	0	0	3145	2884	0.0002	-12.2877	0	794448	0	70	0	2.7
CG2042	cgp2453	1409	1410	0	0	3656	3901	0.0001	-13.2877	0	939765	0	77	0	2.7
CG2043	cgp4102	395	396	0	0	1	28	0.0333	-4.90833	0.0787808	78012	0	2	0	0.3
CG2044	cgp2455	1148	1149	0	0	2345	3781	0.0002	-12.2877	0	626205	0	59	0	2.6
CG2045	cgp2456	719	720	0	0	2236	1343	0.0003	-11.7027	0	244080	0	43	0	3
CG2046	cgp2457	1142	1143	173	0	5197	4144	0.0186	-5.74855	0	605815	1	88	0	3.8
CG2047	pgp2	656	657	0	173	3331	2297	0.0309	-5.01625	0	198758	1	56	0.1	4.3
CG2048	ptpA	500	487	0	0	887	1978	0.0003	-11.7027	1e-08	111280	0	31	0	3.2
CG2049	cgp2460	1001	1002	0	1387	985	960	0.7133	-0.487419	0.0001319	494495	1	16	0	0.8
CG205	cgp0239	227	228	0	0	82	126	0.0048	-7.70275	0.0124179	25422	0	5	0	1.1
CG2050	tnp4a	395	396	0	0	701	1486	0.0005	-10.9658	1.1e-07	73260	0	26	0	3.3
CG2051	cgp2462	593	594	0	0	2222	1584	0.0003	-11.7027	1e-08	167211	0	31	0	2.6
CG2052	cgpt5041	75	76	0	0	0	0	1	0		2888	0	0	0	0
CG2053	cgp2464	431	432	173	0	487	336	0.2112	-2.24332	1.433e-05	89218	1	20	0.1	2.3
CG2054	aceE	2768	2769	0	0	4	0	0.2	-2.32193	0.0227306	3.82814e+06	0	4	0	0.1
CG2055	cgp2467	791	792	0	0	1255	2265	0.0003	-11.7027	0	297000	0	42	0	2.7
CG2056	cgp2468	890	887	0	0	1819	2286	0.0002	-12.2877	0	373427	0	45	0	2.5
CG2057	cgp2470	992	993	0	0	4009	3964	0.0001	-13.2877	0	453801	0	81	0	4.1
CG2058	cgp2471	800	801	0	0	2741	2721	0.0002	-12.2877	0	297572	0	58	0	3.6
CG2059	cgp2472	1016	1017	0	0	3396	1247	0.0002	-12.2877	0	491720	0	52	0	2.6
CG206	cgp0240	491	488	0	0	1006	1418	0.0004	-11.2877	0	111020	0	33	0	3.4
CG2060	acpM	293	294	0	0	920	430	0.0007	-10.4804	0.00126639	41895	0	9	0	1.5
CG2061	cgp2474	827	828	0	867	1197	1791	0.2904	-1.78389	3e-08	329974	1	34	0.1	2.1
CG2062	cgp2475	1034	1035	0	0	2220	4465	0.0001	-13.2877	0	505598	0	58	0	2.8
CG2063	cgp2477	428	429	0	0	1613	1984	0.0003	-11.7027	0	84942	0	33	0	3.8
CG2064	cgp2478	809	810	0	0	2481	3506	0.0002	-12.2877	0	300915	0	70	0	4.3
CG2065	cgp2479	458	459	0	0	1010	1204	0.0005	-10.9658	1e-08	98226	0	31	0	3.4
CG2066	cgp2480	563	564	0	173	1631	1730	0.0518	-4.2709	0	148906	1	37	0.1	3.3
CG2067	cgp2481	242	243	0	0	905	115	0.001	-9.96578	0.00220343	28552.5	0	8	0	1.6
CG2068	cgp2482	545	546	0	0	1049	1202	0.0004	-11.2877	2.2e-07	142233	0	25	0	2.3
CG2069	cgp2483	428	425	0	0	484	1177	0.0006	-10.7027	0.00014143	87550	0	13	0	1.5
CG207	cgp0241	455	456	0	0	2091	2158	0.0002	-12.2877	0	94164	0	45	0	4.9
CG2070	cgp2484	344	345	0	0	1473	1443	0.0003	-11.7027	9.6e-07	55717.5	0	22	0	3.2
CG2071	cgpt5042	76	77	0	0	0	0	1	0		2964.5	0	0	0	0
CG2072	phoD	1550	1551	0	0	3623	4993	0.0001	-13.2877	0	1136883	0	89	0	2.9
CG2073	cgpt5043	75	76	0	0	0	0	1	0		2888	0	0	0	0
CG2074	cgpt5044	75	76	0	0	160	0	0.0062	-7.33352	0.0412919	2774	0	3	0	2
CG2075	cgp2487	1838	1839	0	0	4488	5767	0.0001	-13.2877	0	1.5751e+06	0	127	0	3.5
CG2076	cgp2488	242	243	0	0	791	402	0.0008	-10.2877	0.00013143	27945	0	13	0	2.7
CG2077	dnaG	1901	1902	0	0	0	272	0.0037	-8.07826	0.0416187	1805949	0	3	0	0.1
CG2078	cgp2490	494	495	0	1214	1373	1325	0.4502	-1.15136	3.3e-07	116091	1	30	0.1	3
CG2079	cgp2491	245	246	0	0	1004	499	0.0007	-10.4804	4.7e-07	27429	0	26	0	5.3
CG208	cgp0242	896	897	347	0	1687	1660	0.1039	-3.26673	0	379009	1	55	0.1	3.1
CG2080	glmS	1871	1872	0	0	1	0	0.5	-1	0.158785	1751256	0	1	0	0
CG2081	dgt	1274	1275	347	0	3357	3355	0.0518	-4.2709	0	769493	1	69	0	2.7
CG2082	cgp2495	677	678	0	2254	1438	2444	0.5807	-0.784135	0	214272	1	47	0.1	3.5
CG2083	cgp2496	2054	2055	173	0	4683	4091	0.0198	-5.65836	0	2006742	1	103	0	2.5
CG2084	cgp2497	488	489	0	0	1412	841	0.0004	-11.2877	5.44e-06	114915	0	20	0	2
CG2085	cgp2498	584	585	0	0	317	175	0.002	-8.96578	3.27e-06	165262	0	20	0	1.7
CG2086	glyS	1385	1386	0	0	0	0	1	0		960498	0	0	0	0
CG2087	cgp2500	371	372	0	0	1509	1351	0.0003	-11.7027	3.3e-07	64728	0	24	0	3.2
CG2088	fur	434	435	0	0	831	623	0.0007	-10.4804	2e-07	89175	0	27	0	3.1
CG2089	cgp2504	1553	1554	0	0	1079	1055	0.0005	-10.9658	2.14e-06	1191141	0	21	0	0.7
CG209	cgp0243	434	435	0	0	1289	1015	0.0004	-11.2877	1e-08	88087.5	0	31	0	3.6
CG2090	cgp2505	107	108	0	0	230	118	0.0029	-8.42973	0.0121363	5562	0	5	0	2.3
CG2091	cgp2507	1073	1074	0	0	2742	1867	0.0002	-12.2877	0	541833	0	67	0	3.1
CG2092	uppS2	731	731	0	0	1	6	0.125	-3	0.0787206	266450	0	2	0	0.1
CG2093	recO	728	729	0	0	446	226	0.0015	-9.38082	2.906e-05	259888	0	17	0	1.2
CG2094	bex	917	918	0	0	1	3	0.2	-2.32193	0.0416042	419985	0	3	0	0.2
CG2095	cgp2511	1322	1323	0	0	2927	4714	0.0001	-13.2877	0	820922	0	82	0	3.1
CG2096	cgp2512	590	591	0	0	1	105	0.0093	-6.74855	0.0787375	174050	0	2	0	0.2
CG2097	phoH2	1019	1016	173	0	1752	1216	0.0586	-4.09296	0	494299	1	45	0	2.2
CG2098	cgp2514	725	725	0	0	2080	2305	0.0002	-12.2877	0	246500	0	46	0	3.2
CG2099	cgp2515	1148	1149	0	0	1334	3480	0.0002	-12.2877	0	624482	0	62	0	2.7
CG21	cgp0026	746	747	173	173	1361	1305	0.1301	-2.94231	3e-07	268568	2	30	0.1	2
CG210	cgp0244	404	405	0	0	1292	1689	0.0003	-11.7027	1.1e-07	76747.5	0	27	0	3.3
CG2100	hrcA	1028	1029	0	0	2712	3527	0.0002	-12.2877	0	494949	0	67	0	3.3
CG2101	cgp2517	1142	1143	0	0	3020	2060	0.0002	-12.2877	0	616648	0	66	0	2.9
CG2102	cgp2518	512	513	0	0	1748	715	0.0004	-11.2877	2.1e-07	125172	0	25	0	2.4
CG2103	cgp2519	680	681	4508	7281	465	221	17.1616	4.10111	0.070575	235188	29	18	2.1	1.3
CG2104	cgp2520	380	377	0	0	1412	1180	0.0004	-11.2877	0	64844	0	36	0	4.8
CG2105	fadD15	1847	1848	173	173	6331	11153	0.0198	-5.65836	0	1565342	2	159	0.1	4.3
CG2106	malQ	2120	2121	0	173	11887	8305	0.0086	-6.86145	0	2100885	1	148	0	3.5
CG2107	cgp2524	1865	1866	1734	0	2626	2992	0.3088	-1.69526	0	1667311	1	80	0	2.1
CG2108	cgp2525	140	141	0	0	1	0	0.5	-1	0.160377	9870	0	1	0	0.4
CG2109	cgp2526	206	199	0	0	657	856	0.0007	-10.4804	2.297e-05	18208.5	0	16	0	4
CG211	cgp0245	635	636	0	0	958	1185	0.0005	-10.9658	5.68e-06	196206	0	19	0	1.5
CG2110	dcp	2036	2037	0	0	5670	5866	0.0001	-13.2877	0	1.96061e+06	0	113	0	2.8
CG2111	cgp2528	1181	1182	0	0	2901	1845	0.0002	-12.2877	0	668421	0	51	0	2.2
CG2112	treS	1814	1815	0	1214	4837	7275	0.1003	-3.31761	0	1538273	1	123	0	3.4
CG2113	treX	1091	1088	0	0	1806	2109	0.0003	-11.7027	0	557600	0	63	0	2.9
CG2114	idi	569	570	0	0	787	1401	0.0005	-10.9658	1e-08	153615	0	32	0	2.8
CG2115	cgp2533	1757	1758	173	0	2871	4806	0.0227	-5.46116	0	1.47324e+06	1	83	0	2.4
CG2116	cgp2534	566	563	0	0	1545	1148	0.0004	-11.2877	0	148914	0	34	0	3
CG2117	cgp2535	521	522	0	0	1746	965	0.0004	-11.2877	2e-08	128673	0	30	0	2.9
CG2118	aecD	1106	1107	0	0	1971	2481	0.0002	-12.2877	0	577854	0	64	0	2.9
CG2119	brnQ	1280	1281	173	0	4282	2615	0.0252	-5.31043	0	785908	1	56	0	2.2
CG212	cgp0246	932	929	0	0	0	1	0.5	-1	0.158916	431056	0	1	0	0.1
CG2120	cgp2538	980	981	0	0	3677	2275	0.0002	-12.2877	0	448317	0	68	0	3.5
CG2121	cgp2539	1847	1848	0	0	3817	3897	0.0001	-13.2877	0	1627164	0	88	0	2.4
CG2122	cgp2540	518	519	0	0	1181	692	0.0005	-10.9658	1.2e-07	127934	0	26	0	2.5
CG2123	cgp2542	929	930	0	0	2464	2094	0.0002	-12.2877	0	411060	0	46	0	2.5
CG2124	glcD	2846	2847	347	0	3976	3976	0.0438	-4.51293	0	3901863	1	109	0	1.9
CG2125	cgp2544	713	714	0	347	203	1143	0.2584	-1.95232	3.09e-06	247056	1	23	0.1	1.6
CG2126	cgp2545	257	258	173	0	78	851	0.1871	-2.41812	0.0010458	31867	1	12	0.2	2.3
CG2127	cgp2546	1349	1350	0	173	3151	1919	0.0343	-4.86565	0	872122	1	59	0	2.2
CG2128	cgp2549	1511	1508	0	0	672	1227	0.0005	-10.9658	0	1108380	0	39	0	1.3
CG2129	cgp2550	968	969	0	0	1393	1470	0.0003	-11.7027	0	453008	0	36	0	1.9
CG213	cgp0247	599	600	0	0	735	2834	0.0003	-11.7027	1e-08	170700	0	32	0	2.7
CG2130	cgp2551	830	823	0	0	820	344	0.0009	-10.1178	4e-07	328788	0	24	0	1.5
CG2131	cgp2552	1439	1436	0	0	1854	1383	0.0003	-11.7027	0	996584	0	48	0	1.7
CG2132	cgp2553	551	552	0	0	2358	2609	0.0002	-12.2877	0	137724	0	55	0	5
CG2133	rbsK2	905	906	0	0	3347	1352	0.0002	-12.2877	0	386409	0	54	0	3
CG2134	cgp2556	1400	1401	0	0	2339	2514	0.0002	-12.2877	0	938670	0	65	0	2.3
CG2135	cgp2557	974	975	0	0	2060	4212	0.0002	-12.2877	0	444112	0	65	0	3.3
CG2136	cgp2558	767	768	0	0	3024	2651	0.0002	-12.2877	0	273024	0	57	0	3.7
CG2137	aceB	2219	2216	173	0	4616	5180	0.0178	-5.81198	0	2.33792e+06	1	108	0	2.4
CG2138	aceA	1298	1299	0	173	5952	5508	0.0152	-6.03978	0	776185	1	109	0	4.2
CG2139	thiX	572	573	0	0	2345	2860	0.0002	-12.2877	0	150126	0	51	0	4.5
CG214	cgp0248	791	792	0	0	1	85	0.0115	-6.44222	0.0125998	311652	0	5	0	0.3
CG2140	cgp2562	590	591	0	0	1073	1267	0.0004	-11.2877	1.11e-06	168140	0	22	0	1.9
CG2141	lcoP	1892	1893	0	520	3805	3554	0.0708	-3.82011	0	1705639	1	94	0	2.5
CG2142	cgp2564	281	282	0	0	0	625	0.0016	-9.28771	0.0225588	39198	0	4	0	0.7
CG2143	cgp2565	998	999	0	0	2186	2165	0.0002	-12.2877	0	473026	0	54	0	2.7
CG2144	cgp2566	1595	1596	0	0	4669	4149	0.0001	-13.2877	0	1204182	0	88	0	2.8
CG2145	cgp2567	386	387	173	0	666	403	0.1626	-2.6206	0.00021168	72182	1	15	0.1	1.9
CG2146	dctM	1313	1314	0	0	2922	3451	0.0002	-12.2877	0	819279	0	69	0	2.6
[truncated: 1,661 more rows]

## Sheet: WT-CL31_2_results_genes
Loci	Name	length	TA sites	WT-CL31_2 F reads	WT-CL31_2 R reads	nophage_2 F reads	nophage_2 R reads	Ratio (Mut/WT)	log2	Mann Pvalue	Mann Statistic	WT-CL31_2 Unique Insertions	nophage_2 Unique Insertions	WT-CL31_2 Diversity	nophage_2 Diversity
[truncated: 2,937 more rows]

[truncated: 2 more sheets: CP-CL31_1_results_genes, CP-CL31_2_results_genes]
