# Supplementary material for: Phage resistance profiling identifies new genes required for biogenesis and modification of the corynebacterial cell envelope
Source: eLife. 2022 Nov 9;11:e79981. doi: 10.7554/eLife.79981 (PMC9671496; doi:10.7554/eLife.79981)
Supplement: Figure 2—source data 3. — This spreadsheet contains the data used to create Figure 2. [file elife-79981-fig2-data3.xlsx]

## Sheet: heatmap genes
Name	cgp#	Cog_1	Cog_2	WT-CL31_1	WT-CL31_2	CP-CL31_1	CP-CL31_2
cgp0391	cgp0391	9.41085	9.42362	-11.7027	-1.48237	-2.72642	-4.05649
cgp0393	cgp0393	8.92987	9.54913	-10.1178	-1.07704	-10.1178	-9.70275
cgp0394	cgp0394	9.09045	9.42352	-11.2877	-11.2877	-4.02562	-3.51953
cgp0658	cgp0658	9.0163	8.79212	-4.54625	0.0191	-0.864859	-4.12532
cgp2875	cgp2875	7.10704	7.23714	-8.82828	-9.38082	0.0022	-9.38082
porA	cgp3008	2.32193	4.12469	0.04	-3.17007	-4.64386	-3.17007
porH	cgp3009	1.94152	1.76854	0.0039	-8.53282	0.0039	-8.53282
cgp0810	cgp0810	0.620399	-1.75536	8.29326	8.79494	9.45417	9.38019
cgp0811	cgp0811	-1.58511	5.70966	12.4229	11.3053	14.3336	13.9599
coaE	cgp1538	-2	0	10.3926	8.68299	7.54303	9.68825
otsA	cgp2907	6.33882	2.27867	12.2305	9.67459	15.352	12.0457
pptA	cgp2171	0.0028	-0.356421	4.8286	5.98433	5.33542	6.32121
pccB	cgp3177	6.68883	8.02113	11.1007	13.884	14.5051	16.9109
pks	cgp3178	4.69349	3.99447	9.02237	7.65032	12.2717	10.8
fadD2	cgp3179	1.1145	-6.57347	8.99339	8.62686	11.7962	11.2731
cmt1	cgp0413	3.61624	3.71603	11.1499	9.93256	0.66712	2.41386
aftB	cgp3187	4.49214	5.45994	11.101	11.2978	9.51115	10.5254
deoC	cgp0475	5.2842	2.30241	14.0723	14.221	14.4579	14.2458
cgp1246	cgp1246	-0.481969	-1.24811	9.89921	10.6841	8.46238	9.68124
cgp2172	cgp2172	-1.72977	-3.31043	6.72837	6.58239	7.9932	8.13694
cysR	cgp0156	6.63721	6.23116	0.0037	-1.63756	0.0037	-9.28771
cgp0356	cgp0356	-3.64025	-3.95904	5.94571	5.4924	-4.37482	-12.2877
cgp1356	cgp1356	7.96	5.96809	0	-2.32193	0	-2.32193
ppmC	cgp1672	0.0047	-4.52284	4.61638	6.32663	5.81245	8.07006
ansA	cgp2352	-2.58208	-12.2877	4.10824	3.08212	-11.7027	-4.33061
cgp0047	cgp0047	-2.39365	-5.27649	3.33981	2.73244	5.32428	4.64162
cgp0396	cgp0396	8.99617	9.3582	-11.7027	-4.11029	-0.242294	-4.10284
cgp0475	cgp0475	1.6688	0.425782	8.55232	8.4463	10.8668	10.1999
cgp0853	cgp0853	-10.7027	-10.4804	2.91921	2.7366	-10.7027	-10.4804
cgp1247	cgp1247	-3.44693	-4.06371	4.29867	4.10495	1.5914	2.43787
cgp2519	cgp2519	-9.38082	-10.1178	4.10111	2.39325	-9.38082	-10.1178
cgp2906	cgp2906	7.40939	2.04208	13.7418	10.6572	15.6662	12.6257
cgp3051	cgp3051	4.10124	4.25381	-11.7027	-4.05649	0.0003	-11.7027
