# Supplementary material for: Phage resistance profiling identifies new genes required for biogenesis and modification of the corynebacterial cell envelope
Source: eLife. 2022 Nov 9;11:e79981. doi: 10.7554/eLife.79981 (PMC9671496; doi:10.7554/eLife.79981)
Supplement: Figure 3—source data 1. — This spreadsheet contains the data from Sher et al., 2020 used to make Figure 3C. [file elife-79981-fig3-data1.xlsx]

## Sheet: Fig 3c
	Untreated		Cell wall																	AG			DNA		Transcription		Translation								Stress
gene	11g_A	11g_B	Amp	Amp_H	PenG	Cefs	Cefs_H	Ceph	Mero	Mero_H	Bacit	Vanco	Vanco_H	Cyclo	Phospho	Lyso	Lyso_H	Nisin	Nisin_H	Emb	BZ043	BZ043_H	Novo	Novo_H	Rif	Rif_H	Cam	Cam_H	Erythro	Erythro_H	Strep	Strep_H	Tet	Tet_H	SDS	SDS_H	Heat	MgCl	NaCl	NaCl_H
cgp0396	0.96	0.96	0.81	0.64	0.71	0.68	0.65	0.82	0.9	0.86	1.13	0.95	0.8	0.75	0.95	0.61	0.68	0.87	0.75	0.96	0.83	0.8	0.92	0.94	0.9	0.98	1.02	1.01	0.97	0.94	0.89	0.86	0.97	0.96	0.86	0.88	1	0.99	0.99	1
cgp0658	0.96	0.97	0.82	0.75	0.74	0.72	0.58	0.82	0.89	0.86	1.09	0.94	0.87	0.9	0.95	0.71	0.76	0.84	0.74	0.94	0.82	0.77	0.95	0.9	0.95	0.97	0.97	0.98	0.94	0.93	0.93	0.9	0.95	0.95	0.93	0.9	0.98	0.98	1	1
cgp0394	1	1	0.85	0.8	0.78	0.84	0.82	0.9	0.93	0.86	1.16	0.97	0.9	0.87	0.96	0.73	0.77	0.87	0.79	0.92	0.88	0.83	0.95	0.95	0.96	0.97	1.01	1.02	0.99	0.96	0.98	0.93	0.97	0.97	0.95	0.95	0.99	0.96	1	1
cgp0393	0.95	1.01	0.88	0.79	0.77	0.89	0.91	0.9	0.95	0.86	1.15	1.07	0.87	0.91	0.99	0.75	0.73	0.83	0.73	1.03	0.85	0.85	1.01	0.88	1.03	1.01	1	0.99	1	0.97	0.97	0.97	1	1.01	0.92	0.97	1.02	1.01	1.02	1.01
cgp0391	0.95	1.01	0.9	0.9	0.81	0.94	0.92	0.94	0.9	0.82	1.15	0.99	0.88	1.06	0.98	0.84	0.84	0.81	0.73	0.95	0.89	0.82	1.01	0.96	0.99	1.01	0.99	1	0.99	0.98	0.98	1	0.98	0.95	0.98	0.98	0.99	1.02	1.04	1.04
porH	0.65	0.89	0.9	0.96	0.98	0.85	0.84	0.85	1	1.11	1.08	0.81	1	1	0.85	0.88	0.9	0.81	0.83	0.68	0.8	0.76	0.86	0.98	0.86	0.92	0.86	0.88	0.92	0.8	0.77	0.87	0.84	0.88	0.79	0.9	0.93	0.88	0.92	0.88
porA	0	0.84	0.76	0.96	1	0	0.91	0.86	0.57	1.06	0.77	0	0.88	1	0.61	0.94	0.68	0	0.56	0.65	0	0.64	0.97	1	0	0.74	0.94	0.83	0.71	0.74	0.87	0	0.8	0.63	0.55	0	0	0.68	0.83	0.62
otsA	0.78	0.72	0.67	0.73	0.37	0.71	0.63	0.56	0.11	0.68	0.63	0.64	0.66	0.57	0.64	0.45	0.58	0.06	0.04	0.8	0.63	0.58	0.37	0.51	0.55	0.65	0.64	0.66	0.7	0.57	0.76	0.76	0.64	0.67	0.64	0.43	0.68	0.72	0.65	0.58
