# Supplementary material for: Phage resistance profiling identifies new genes required for biogenesis and modification of the corynebacterial cell envelope
Source: eLife. 2022 Nov 9;11:e79981. doi: 10.7554/eLife.79981 (PMC9671496; doi:10.7554/eLife.79981)
Supplement: Figure 4—source data 1. — This spreadsheet contains the data used to make Figure 4C and D. [file elife-79981-fig4-data1.xlsx]

## Sheet: Fig 4c
adsorption 1	A	B	avg
T0	580000	800000	690000
MB001	293000	230000	261500
ΔporAH	213000	228000	220500
ΔppgS	305000	480000	392500
adsorption 2	A	B	avg
T0	980000	1110000	1045000
MB001	330000	327000	328500
ΔporAH	550000	450000	500000
ΔppgS	570000	510000	540000
adsorption 3	A	B	avg
T0	590000	850000	720000
MB001	590000	410000	500000
ΔporAH	210000	250000	230000
ΔppgS	260000	280000	270000

## Sheet: Fig 4d
COI - 1	A	B	avg
MB001	410000	510000	460000
ΔporAH	26000	34000	30000
ΔppgS	3600	7000	5300
COI - 2	A	B	avg
MB001	350000	340000	345000
ΔporAH	12700	9000	10850
ΔppgS	4900	3200	4050
COI - 3	A	B	avg
MB001	700000	520000	610000
ΔporAH	12200	12700	12450
ΔppgS	11300	11600	11450
