# Supplementary material for: Phage resistance profiling identifies new genes required for biogenesis and modification of the corynebacterial cell envelope
Source: eLife. 2022 Nov 9;11:e79981. doi: 10.7554/eLife.79981 (PMC9671496; doi:10.7554/eLife.79981)
Supplement: Figure 6—source data 1. — This spreadsheet contains the data used to make Figure 6C and D. [file elife-79981-fig6-data1.xlsx]

## Sheet: Fig 6c
WT-CL31
MB001 - 1	A	B	avg		Δcmt1 - 1	A	B	avg
T0	400000	470000	435000		T0	400000	470000	435000
10	198000	248000	223000		10	280000	410000	345000
20	145000	138000	141500		20	270000	270000	270000
30	127000	117000	122000		30	230000	235000	232500
MB001 - 2	A	B	avg		Δcmt1 - 2	A	B	avg
T0	450000	350000	400000		T0	450000	350000	400000
10	430000	350000	390000		10	380000	380000	380000
20	240000	290000	265000		20	290000	280000	285000
30	214000	170000	192000		30	219000	185000	350000
MB001 - 3	A	B	avg		Δcmt1 - 3	A	B	avg
T0	480000	360000	420000		T0	480000	360000	420000
10	214000	201000	207500		10	306000	400000	353000
20	120000	125000	122500		20	288000	350000	319000
30	71000	75000	73000		30	340000	350000	350000

## Sheet: Fig 6d
CP-CL31
MB001 - 1	A	B	avg		Δcmt1 - 1	A	B	avg
T0	184000	209000	196500		T0	184000	209000	196500
10	17000	12000	14500		10	99000	100000	99500
20	5800	5400	5600		20	30000	36000	33000
30	3200	5800	4500		30	9100	9000	9050
MB001 - 2	A	B	avg		Δcmt1 - 2	A	B	avg
T0	228000	186000	207000		T0	228000	186000	207000
10	15700	25700	20700		10	92000	148000	120000
20	9000	12700	10850		20	30000	47000	38500
30	7600	5900	6750		30	12000	14600	13300
MB001 -3	A	B	avg		Δcmt1 - 3	A	B	avg
T0	300000	510000	405000		T0	300000	510000	405000
10	29000	42000	35500		10	75000	98000	86500
20	8600	10700	9650		20	23000	24900	23950
30	6800	9500	8150		30	8400	14100	11250
