# Supplementary material for: Phage resistance profiling identifies new genes required for biogenesis and modification of the corynebacterial cell envelope
Source: eLife. 2022 Nov 9;11:e79981. doi: 10.7554/eLife.79981 (PMC9671496; doi:10.7554/eLife.79981)
Supplement: Figure 7—source data 2. — This spreadsheet contains the data used to make Figure 7D. [file elife-79981-fig7-data2.xlsx]

## Sheet: Fig 7d
WT-CL31 - 1	A	B		CP-CL31 - 1	A	B
T0	236000	228000		T0	300000	360000
MB001	32000	48000		MB001	8600	8600
ΔahfA	200000	217000		ΔahfA	137000	213000
WT-CL31 - 2	A	B		CP-CL31 - 2	A	B
T0	184000	207000		T0	186000	240000
MB001	102000	94000		MB001	31000	45000
ΔahfA	165000	226000		ΔahfA	62000	122000
WT-CL31 - 3	A	B		CP-CL31 - 3	A	B
T0	312000	400000		T0	253000	280000
MB001	163000	139000		MB001	42000	49000
ΔahfA	324000	350000		ΔahfA	81000	75000
