# Supplementary material for: Phage resistance profiling identifies new genes required for biogenesis and modification of the corynebacterial cell envelope
Source: eLife. 2022 Nov 9;11:e79981. doi: 10.7554/eLife.79981 (PMC9671496; doi:10.7554/eLife.79981)
Supplement: Figure 8—source data 2. — This spreadsheet contains the data used to make Figure 8B. [file elife-79981-fig8-data2.xlsx]

## Sheet: Fig 8b
OD - 1	PBS	WT EV	WT Psod-ahfA	ΔahfA	ΔahfA Psod-ahfA	ahfAEVLPL	Δpks		6TMR - 1	PBS	WT EV	WT Psod-ahfA	ΔahfA	ΔahfA Psod-ahfA	ahfAEVLPL	Δpks
A	0.0347	0.1177	0.1117	0.1093	0.1286	0.12	0.124		A	3	216	200	10	230	37	4
B	0.0345	0.1166	0.1145	0.1093	0.128	0.1182	0.1244		B	2	205	208	13	233	36	5
average	0.0346	0.11715	0.1131	0.1093	0.1283	0.1191	0.1242		average	2.5	210.5	204	11.5	231.5	36.5	4.5
OD - 2	PBS	WT EV	WT Psod-ahfA	ΔahfA	ΔahfA Psod-ahfA	ahfAEVLPL	Δpks		6TMR - 2	PBS	WT EV	WT Psod-ahfA	ΔahfA	ΔahfA Psod-ahfA	ahfAEVLPL	Δpks
A	0.0344	0.115	0.1134	0.1005	0.128	0.1092	0.1148		A	3	205	201	9	220	29	6
B	0.0344	0.1161	0.1139	0.1005	0.1276	0.1099	0.1132		B	3	203	200	7	232	29	5
average	0.0344	0.11555	0.11365	0.1005	0.1278	0.10955	0.114		average	3	204	200.5	8	226	29	5.5
OD - 3	PBS	WT EV	WT Psod-ahfA	ΔahfA	ΔahfA Psod-ahfA	ahfAEVLPL	Δpks		6TMR - 3	PBS	WT EV	WT Psod-ahfA	ΔahfA	ΔahfA Psod-ahfA	ahfAEVLPL	Δpks
A	0.0342	0.1253	0.1215	0.119	0.1021	0.1035	0.1257		A	3	234	249	11	212	32	5
B	0.0347	0.1241	0.1214	0.1181	0.1038	0.1039	0.1245		B	2	256	253	11	211	33	7
average	0.03445	0.1247	0.12145	0.11855	0.10295	0.1037	0.1251		average	2.5	245	251	11	211.5	32.5	6
