# Supplementary material for: Phage resistance profiling identifies new genes required for biogenesis and modification of the corynebacterial cell envelope
Source: eLife journal article supplement (doi:10.7554/elife.79981), 2022-11-04

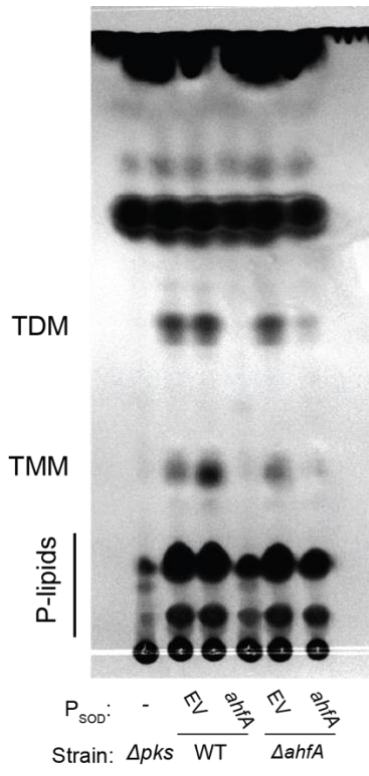

Supplement: supp [file elife-79981-supp-v1.zip]
